# Supplementary material
Source: PubMed Central journal article supplement (PMC3985498)
Supplement: ja501005g_si_001.pdf [file ja501005g_si_001.pdf]

# Acylammonium Salts as Dienophiles in Diels-Alder-Lactonization Organocascades

Mikail E. Abbasov,<sup>†</sup> Brandi M. Hudson,<sup>‡</sup> Dean J. Tantillo<sup>‡</sup> and Daniel Romo<sup>†\*</sup>

<sup>†</sup>*Department of Chemistry, Texas A&M University, P.O. Box 30012, College Station, Texas 77842-3012*

<sup>‡</sup>*Department of Chemistry, University of California-Davis, One Shields Avenue, Davis, California 95616*

## Table of Contents

|                                                                                                                                                                     |           |
|---------------------------------------------------------------------------------------------------------------------------------------------------------------------|-----------|
| General procedures and abbreviation list.....                                                                                                                       | S2-S3     |
| Preparation of compounds <b>S3, S4, S7, S8, S11, S12, S14, S15, S17, S18, 2a-f</b> , and (±)- <b>2g</b> .....                                                       | S4-S14    |
| DAL optimization studies ( <b>Tables S1-S3</b> ).....                                                                                                               | S15-S18   |
| Representative procedure for the enantioselective DAL process as described for bicyclic $\gamma$ -lactone (–)- <b>3b</b> .....                                      | S19-S30   |
| Representative procedure for the stereodivergent DAL process as described for bicyclic $\gamma$ -lactones (–)- <b>3k</b> and (+)- <b>3k'</b> .....                  | S31-S35   |
| Synthetic applications of bicyclic $\gamma$ -lactones (–)- <b>3d</b> and (–)- <b>3h</b> .....                                                                       | S36-S37   |
| Single crystal X-ray structures and selected crystallographic data for compounds (–)- <b>3k</b> , (–)- <b>S21</b> and (+)- <b>3c'</b> ( <b>Figures S1-S3</b> )..... | S38-S48   |
| Details of computational studies of the acylammonium conformation and the Diels-Alder reaction ( <b>Figures S4-S11</b> ).....                                       | S49-S130  |
| <sup>1</sup> H and <sup>13</sup> C NMR spectra.....                                                                                                                 | S131-S164 |
| Chiral HPLC traces for compounds <b>3a-k, 3a'</b> , (+)- <b>3c'</b> , and (–)- <b>3k'</b> ( <b>Figures S12-S14</b> ).....                                           | S165-S180 |
| References.....                                                                                                                                                     | S181-S183 |

## General procedures

All non-aqueous reactions were performed under a nitrogen atmosphere in oven-dried glassware. Dichloromethane ( $\text{CH}_2\text{Cl}_2$ ), tetrahydrofuran (THF), diethyl ether ( $\text{Et}_2\text{O}$ ), acetonitrile ( $\text{CH}_3\text{CN}$ ) and toluene (PhMe) were dried by passing through activated alumina (solvent purification system). Diisopropylethylamine ( $\text{EtN}(\text{iPr})_2$ ) and triethylamine ( $\text{Et}_3\text{N}$ ) were distilled from calcium hydride prior to use. Other solvents and reagents were used as received from commercially available sources. Deuterated solvents were purchased from Cambridge Isotopes and used as received.  $^1\text{H}$  NMR spectra were measured at 500 MHz and referenced relative to residual chloroform (7.26 ppm) or benzene (7.16 ppm) and were reported in parts per million. Coupling constants ( $J$ ) were reported in Hertz (Hz), with multiplicity reported following usual convention: s, singlet; d, doublet; t, triplet; q, quartet; dd, doublet of doublets; dt, doublet of triplets; dq, doublet of quartets; qd, quartet of doublets; td, triplet of doublets; tt, triplet of triplets; ddd, doublet of doublet of doublets; ddt, doublet of doublet of triplets; ddq, doublet of doublet of quartets; dddd, doublet of doublet of doublet of doublets; ddddt, doublet of doublet of doublet of doublet of triplets; ddquint, doublet of doublet of quintets; m, multiplet, br s, broad singlet.  $^{13}\text{C}$  NMR spectra were measured at 125 MHz and referenced relative to residual chloroform (77.23 ppm) or benzene (128.06 ppm) and were reported in parts per million (ppm). Flash column chromatography was performed with 60Å Silica Gel (230-400 mesh) as stationary phase on an automated flash chromatography system (EtOAc/hexanes as eluent unless indicated otherwise). High-resolution mass spectra (ESI) were obtained through the Laboratory for Biological Mass Spectrometry (Texas A&M University). Thin Layer Chromatography (TLC) was performed using glass-backed silica gel F254 (Silicycle, 250  $\mu\text{m}$  thickness). Visualization of developed plates was performed by fluorescence quenching or by treating with Seebach's<sup>1</sup> staining solution. *Fourier* Transform Infrared (FTIR) spectra were recorded as thin films on NaCl plates. Optical rotations were recorded on a polarimeter at 589 nm employing a 25 mm cell. High Performance Liquid Chromatography (HPLC) was performed on a chromatographic system using various chiral columns (25 cm) as noted. X-ray diffraction was obtained by the X-ray Diffraction Laboratory at Texas A&M University. (*R*)-(-)-HBTM,<sup>2</sup> TMSQD<sup>3</sup> and BzQN<sup>4</sup> were

synthesized according to literature procedures. (*S*)-(-)-BTM and (*R*)-(+)-BTM were purchased from TCI chemicals and used as received. (DHQ)<sub>2</sub>PHAL, (*S*)-(-)-Tetramisole and (-)-Tröger's base were purchased from Sigma-Aldrich and used as received. (*R*)-(+)-PPY\* was purchased from Strem chemicals and used as received. All unsaturated acid chlorides were purchased from Sigma-Aldrich and used as received without further purification.

### Abbreviation list

|                                    |   |                                                                           |
|------------------------------------|---|---------------------------------------------------------------------------|
| DBU                                | = | 1,8-diazabicyclo[5.4.0]undec-7-ene                                        |
| EtN( <i>i</i> Pr) <sub>2</sub>     | = | <i>N,N</i> -diisopropylethylamine                                         |
| Et <sub>3</sub> N                  | = | triethylamine                                                             |
| DTBP                               | = | 2,6-di- <i>tert</i> -butylpyridine                                        |
| DIBAL-H                            | = | diisobutylaluminum hydride                                                |
| TIPSOTf                            | = | triisopropylsilyl trifluoromethanesulfonate                               |
| TBHP                               | = | <i>tert</i> -butyl hydroperoxide                                          |
| Rh <sub>2</sub> (cap) <sub>4</sub> | = | dirhodium tetracaprolactamate                                             |
| TsCl                               | = | 4-toluenesulfonyl chloride                                                |
| TASF                               | = | tris(dimethylamino)sulfonium difluorotrimethylsilicate                    |
| ( <i>R</i> )-(-)-HBTM              | = | ( <i>R</i> )-(-)-homobenzotetramisole                                     |
| ( <i>S</i> )-(-)-BTM               | = | ( <i>S</i> )-(-)-benzotetramisole                                         |
| TMSQD                              | = | <i>O</i> -trimethylsilyl quinidine                                        |
| BzQN                               | = | <i>O</i> -benzoyl quinine                                                 |
| (DHQ) <sub>2</sub> PHAL            | = | Hydroquinine 1,4-phthalazinediyl diether                                  |
| ( <i>R</i> )-(+)-PPY*              | = | ( <i>R</i> )-(+)-4-pyrrolidinopyrindinyl(pentamethylcyclopentadienyl)iron |

**Preparation of compounds S3, S4, S7, S8, S11, S12, S14, S15, S17, S18, 2a-f, and (±)-2g:**

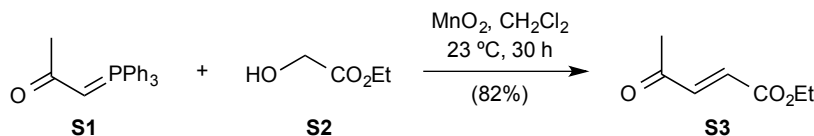

**(E)-ethyl 4-oxopent-2-enoate (S3):** (*E*)-ethyl 4-oxopent-2-enoate **S3** was prepared by a modified reported procedure.<sup>5</sup> To a solution of 1-(triphenylphosphoranylidene)-2-propanone **S1** (21.0 g, 65.9 mmol, 1.0 equiv.) and ethyl glycolate **S2** (7.5 mL, 79.2 mmol, 1.2 equiv.) in anhydrous CH<sub>2</sub>Cl<sub>2</sub> (220 mL) was added MnO<sub>2</sub> (57.5 g, 661.3 mmol, 10.0 equiv.) and vigorously stirred at ambient temperature (23 °C) for 30 h. The mixture was filtered through a short pad of celite and the filtrate was concentrated using rotary evaporation. The residue was then diluted with cold Et<sub>2</sub>O (100 mL), filtered through a plug of celite and washed with additional Et<sub>2</sub>O (50 mL). The filtrate was concentrated by rotary evaporation and purified by an automated flash chromatography system (5 → 20% EtOAc/hexanes) providing 7.68 g (82% yield) of ketoester **S3** as a pale yellow liquid: TLC (EtOAc:hexanes, 1:9 v/v): R<sub>f</sub> = 0.38; <sup>1</sup>H NMR (500 MHz, CDCl<sub>3</sub>): δ 6.99 (d, *J* = 16.1 Hz, 1H), 6.62 (dd, *J* = 16.1, 0.4 Hz, 1H), 4.24 (qd, *J* = 7.1, 0.4 Hz, 2H), 2.34 (s, 3H), 1.30 (td, *J* = 7.1, 0.5 Hz, 3H); <sup>13</sup>C NMR (125 MHz; CDCl<sub>3</sub>): δ 197.7, 165.5, 140.0, 131.7, 61.5, 28.2, 14.2; IR (thin film): 2985, 1726, 1703, 1687 cm<sup>-1</sup>; HRMS (ESI+) *m/z* calcd for C<sub>7</sub>H<sub>10</sub>LiO<sub>3</sub> [M+Li]<sup>+</sup>: 149.0790, found: 149.0784.

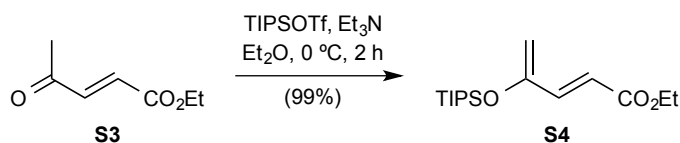

**(E)-ethyl 4-((triisopropylsilyloxy)penta-2,4-dienoate (S4):** To a solution of ketoester **S3** (2.25 g, 15.8 mmol, 1.0 equiv.) in anhydrous Et<sub>2</sub>O (32 mL) at 0 °C was added Et<sub>3</sub>N (4.4 mL, 31.6 mmol, 2.0 equiv.) dropwise. After stirring for 10 min, TIPSOTf (5.1 mL, 18.9 mmol, 1.2 equiv.) was added over a period of 30 min. The reaction was stirred for 2 h at 0 °C then quenched with a saturated aqueous solution of NaHCO<sub>3</sub> (30 mL). The aqueous layer was extracted with Et<sub>2</sub>O (2 × 50 mL) and the combined organic extracts

were then washed with brine (50 mL). The organic layer was then dried over anhydrous MgSO<sub>4</sub>, filtered, and concentrated by rotary evaporation. The residue was purified by an automated flash chromatography system (0.5 → 10% EtOAc/hexanes) providing 4.70 g (99% yield) of diene **S4** as a clear colorless liquid: TLC (EtOAc:hexanes, 1:9 v/v): R<sub>f</sub> = 0.73; <sup>1</sup>H NMR (500 MHz, CDCl<sub>3</sub>): δ 7.07 (d, *J* = 15.2 Hz, 1H), 6.18 (d, *J* = 15.2 Hz, 1H), 4.62 (dd, *J* = 1.3, 0.5 Hz, 1H), 4.61 (dd, *J* = 1.2, 0.6 Hz, 1H), 4.21 (q, *J* = 7.1 Hz, 2H), 1.30 (t, *J* = 7.1 Hz, 3H), 1.28–1.20 (m, 3H), 1.10 (d, *J* = 7.3 Hz, 18H); <sup>13</sup>C NMR (125 MHz; CDCl<sub>3</sub>): δ 167.3, 154.0, 142.6, 119.2, 101.8, 60.6, 18.1 (6), 14.4, 12.9 (3); IR (thin film): 2946, 2869, 1719, 1638, 1593 cm<sup>-1</sup>; HRMS (ESI+) *m/z* calcd for C<sub>16</sub>H<sub>31</sub>O<sub>3</sub>Si [M+H]<sup>+</sup>: 299.2037, found: 299.2054.

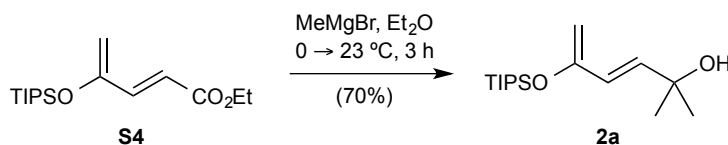

**(E)-2-methyl-5-((triisopropylsilyloxy)hexa-3,5-dien-2-ol (2a):** To a solution of diene **S4** (5.20 g, 17.4 mmol, 1.0 equiv.) in anhydrous Et<sub>2</sub>O (60 mL) at 0 °C was added MeMgBr (3.0 M solution in Et<sub>2</sub>O, 13.4 mL, 40.2 mmol, 2.3 equiv.) was added over a period of 1 h. The reaction was stirred for 2 h at 23 °C then quenched with a saturated aqueous solution of NH<sub>4</sub>Cl (30 mL). The aqueous layer was extracted with Et<sub>2</sub>O (2 × 50 mL) and the combined organic extracts were then washed with brine (30 mL). The organic layer was then dried over anhydrous MgSO<sub>4</sub>, filtered, and concentrated by rotary evaporation. The residue was purified by an automated flash chromatography system (0.5 → 15% EtOAc/hexanes) providing 3.47 g (70% yield) of silyloxydiene alcohol **2a** as a clear colorless oil: TLC (EtOAc:hexanes, 1:9 v/v): R<sub>f</sub> = 0.35; <sup>1</sup>H NMR (500 MHz; CDCl<sub>3</sub>): δ 6.18 (d, *J* = 15.4 Hz, 1H), 6.05 (d, *J* = 15.4 Hz, 1H), 4.31 (s, 1H), 4.28 (s, 1H), 1.34 (s, 6H), 1.26–1.21 (m, 3H), 1.10 (d, *J* = 7.3 Hz, 18H); <sup>13</sup>C NMR (125 MHz; CDCl<sub>3</sub>): δ 155.1, 138.2, 124.8, 95.2, 70.8, 29.9 (2), 18.2 (6), 12.9 (3); IR (thin film): 3374, 2945, 2868, 1591 cm<sup>-1</sup>; HRMS (ESI+) *m/z* calcd for C<sub>16</sub>H<sub>33</sub>O<sub>2</sub>Si [M+H]<sup>+</sup>: 285.2250, found: 285.2242.

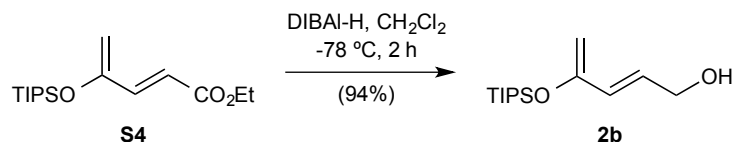

**(E)-4-((triisopropylsilyloxy)penta-2,4-dien-1-ol (2b):** To a solution of diene **S4** (4.70 g, 15.7 mmol, 1.0 equiv.) in anhydrous  $\text{CH}_2\text{Cl}_2$  (120 mL) at  $-78\text{ }^\circ\text{C}$  was added DIBAL-H (1.0 M solution in  $\text{CH}_2\text{Cl}_2$ , 47.0 mL, 3.0 equiv.) dropwise. The reaction was stirred for 2 h then carefully quenched in sequence with  $\text{H}_2\text{O}$  (1.9 mL), 15% aqueous NaOH (1.9 mL), and  $\text{H}_2\text{O}$  (4.7 mL). The dry ice/acetone bath was removed and the mixture was allowed to warm up to ambient temperature ( $23\text{ }^\circ\text{C}$ ) on its own accord. Subsequently, anhydrous  $\text{MgSO}_4$  was added and the reaction mixture was vigorously stirred for 30 min, filtered through a pad of celite and concentrated by rotary evaporation. The residue was purified by an automated flash chromatography (5  $\rightarrow$  20% EtOAc/hexanes) providing 3.78 g (94% yield) of silyloxydiene alcohol **2b** as a pale yellow oil: TLC (EtOAc:hexanes, 1:9 v/v):  $R_f = 0.32$ ;  $^1\text{H NMR}$  (500 MHz,  $\text{CDCl}_3$ ):  $\delta$  6.19 (dt,  $J = 15.2, 5.4$  Hz, 1H), 6.09 (dt,  $J = 15.2, 1.4$  Hz, 1H), 4.31 (d,  $J = 0.5$  Hz, 1H), 4.27 (d,  $J = 0.4$  Hz, 1H), 4.24 (d,  $J = 5.2$  Hz, 2H), 1.27–1.20 (m, 3H), 1.10 (d,  $J = 7.3$  Hz, 18H);  $^{13}\text{C NMR}$  (125 MHz;  $\text{CDCl}_3$ ):  $\delta$  154.8, 129.2, 129.0, 95.1, 63.1, 18.2 (6), 12.9 (3); IR (thin film): 3318, 2945, 2868, 1662, 1591  $\text{cm}^{-1}$ ; HRMS (ESI+)  $m/z$  calcd for  $\text{C}_{14}\text{H}_{29}\text{O}_2\text{Si}$   $[\text{M}+\text{H}]^+$ : 257.1937, found: 257.1926.

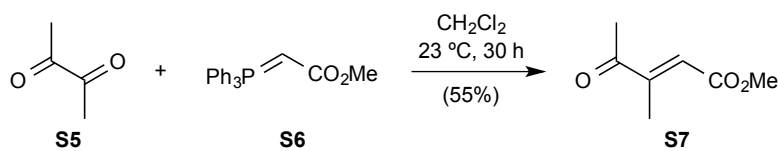

**Methyl (E)-3-methyl-4-oxopent-2-enoate (S7):** To a solution of 2,3-butanedione **S5** (2.6 mL, 30.0 mmol, 1.0 equiv.) in anhydrous  $\text{CH}_2\text{Cl}_2$  (150 mL) was added methyl (triphenylphosphoranylidene)acetate **S6** (10.0 g, 30.0 mmol, 1.0 equiv.) and stirred at ambient temperature ( $23\text{ }^\circ\text{C}$ ) for 30 h. The mixture was filtered through a short pad of celite and the filtrate was concentrated using rotary evaporation. The residue was then diluted with cold  $\text{Et}_2\text{O}$  (80 mL), filtered through a plug of celite and washed with additional  $\text{Et}_2\text{O}$  (40 mL). The filtrate was concentrated by rotary evaporation and purified by an automated flash chromatography system (5  $\rightarrow$  20% EtOAc/hexanes) providing

2.34 g (55% yield) of ketoester **S7** as a clear colorless oil: TLC (EtOAc:hexanes, 1:9 v/v):  $R_f = 0.45$ ;  $^1\text{H NMR}$  (500 MHz,  $\text{CDCl}_3$ ):  $\delta$  6.56 (q,  $J = 1.5$  Hz, 1H), 3.77 (s, 3H), 2.36 (s, 3H), 2.19 (d,  $J = 1.5$  Hz, 3H);  $^{13}\text{C NMR}$  (125 MHz;  $\text{CDCl}_3$ ):  $\delta$  199.9, 166.7, 150.9, 126.1, 51.9, 26.3, 13.2; IR (thin film): 2955, 1728, 1687, 1642  $\text{cm}^{-1}$ ; HRMS (ESI+)  $m/z$  calcd for  $\text{C}_7\text{H}_{10}\text{LiO}_3$   $[\text{M}+\text{Li}]^+$ : 149.0790, found: 149.0797.

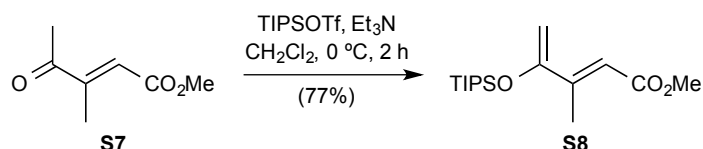

**Methyl (E)-3-methyl-4-((triisopropylsilyl)oxy)penta-2,4-dienoate (S8):** To a solution of ketoester **S7** (2.34 g, 16.5 mmol, 1.0 equiv.) in anhydrous  $\text{CH}_2\text{Cl}_2$  (60 mL) at 0 °C was added  $\text{Et}_3\text{N}$  (5.7 mL, 41.2 mmol, 2.5 equiv.) dropwise. After stirring for 10 min, TIPSOTf (5.3 mL, 19.8 mmol, 1.2 equiv.) was added over a period of 30 min. The reaction was stirred for 2 h at 0 °C then quenched with a saturated aqueous solution of  $\text{NaHCO}_3$  (30 mL). The aqueous layer was extracted with  $\text{Et}_2\text{O}$  (2  $\times$  50 mL) and the combined organic extracts were then washed with brine (50 mL). The organic layer was then dried over anhydrous  $\text{MgSO}_4$ , filtered, and concentrated by rotary evaporation. The residue was purified by an automated flash chromatography system (0.5  $\rightarrow$  10% EtOAc/hexanes) providing 3.79 g (77% yield) of diene **S8** as a yellow oil: TLC (EtOAc:hexanes, 1:9 v/v):  $R_f = 0.76$ ;  $^1\text{H NMR}$  (500 MHz,  $\text{CDCl}_3$ ):  $\delta$  6.39 (d,  $J = 0.6$  Hz, 1H), 4.80 (d,  $J = 1.9$  Hz, 1H), 4.56 (d,  $J = 1.9$  Hz, 1H), 3.71 (s, 3H), 2.28 (d,  $J = 1.2$  Hz, 3H), 1.28-1.20 (m, 3H), 1.10 (d,  $J = 7.3$  Hz, 18H).  $^{13}\text{C NMR}$  (125 MHz;  $\text{CDCl}_3$ ):  $\delta$  168.1, 156.6, 149.8, 115.8, 96.2, 51.2, 18.2 (6), 14.6, 12.9 (3); IR (thin film): 2947, 2869, 1722, 1629, 1597  $\text{cm}^{-1}$ ; HRMS (ESI+)  $m/z$  calcd for  $\text{C}_{16}\text{H}_{31}\text{O}_3\text{Si}$   $[\text{M}+\text{H}]^+$ : 299.2042, found: 299.2029.

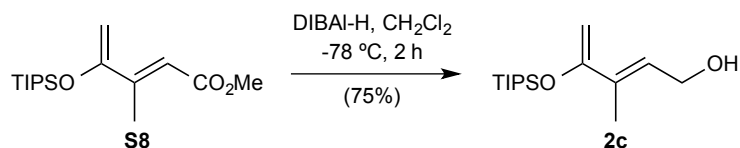

**(E)-3-methyl-4-((triisopropylsilyloxy)methyl)pent-2,4-dien-1-ol (2c):** To a solution of diene **S8** (7.5 g, 25.1 mmol, 1.0 equiv.) in anhydrous  $\text{CH}_2\text{Cl}_2$  (180 mL) at  $-78\text{ }^\circ\text{C}$  was added DIBAL-H (1.0 M solution in  $\text{CH}_2\text{Cl}_2$ , 72.0 mL, 3.0 equiv.) dropwise. The reaction was stirred for 2 h at  $-78\text{ }^\circ\text{C}$  then carefully quenched in sequence with  $\text{H}_2\text{O}$  (2.9 mL), 15% aqueous NaOH (2.9 mL), and  $\text{H}_2\text{O}$  (7.2 mL). The dry ice/acetone bath was removed and the mixture was allowed to warm up to ambient temperature ( $23\text{ }^\circ\text{C}$ ) on its own accord. Subsequently, anhydrous  $\text{MgSO}_4$  was added and the reaction mixture was vigorously stirred for 30 min, filtered through a pad of celite and concentrated by rotary evaporation. The residue was purified by an automated flash chromatography (5  $\rightarrow$  20% EtOAc/hexanes) providing 4.88 g (75% yield) of silyloxydiene alcohol **2c** as a clear colorless oil: TLC (EtOAc:hexanes, 1:9 v/v):  $R_f = 0.30$ ;  $^1\text{H NMR}$  (500 MHz,  $\text{C}_6\text{D}_6$ ):  $\delta$  6.44 (tt,  $J = 6.48, 0.55$  Hz, 1H), 4.45 (d,  $J = 1.2$  Hz, 1H), 4.36 (d,  $J = 0.9$  Hz, 1H), 4.06 (d,  $J = 6.3$  Hz, 2H), 1.62 (d,  $J = 0.9$  Hz, 3H), 1.23-1.18 (m, 3H), 1.14 (d,  $J = 6.2$  Hz, 18H);  $^{13}\text{C NMR}$  (125 MHz;  $\text{C}_6\text{D}_6$ ):  $\delta$  157.7, 132.6, 128.1, 91.1, 59.8, 18.4 (6), 13.5, 13.2 (3); IR (thin film): 3320, 2945, 2868, 1593  $\text{cm}^{-1}$ ; HRMS (ESI+)  $m/z$  calcd for  $\text{C}_{15}\text{H}_{31}\text{O}_2\text{Si}$   $[\text{M}+\text{H}]^+$ : 271.2093, found: 271.2092.

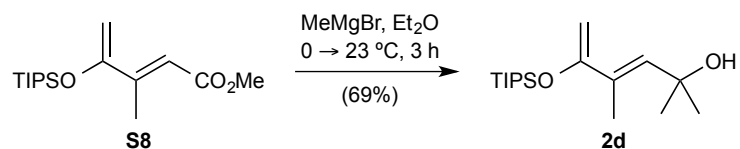

**(E)-2,4-dimethyl-5-((triisopropylsilyloxy)methyl)hexa-3,5-dien-2-ol (2d):** To a solution of diene **S8** (1.0 g, 3.2 mmol, 1.0 equiv.) in anhydrous  $\text{Et}_2\text{O}$  (10 mL) at  $0\text{ }^\circ\text{C}$  was added MeMgBr (3.0 M solution in  $\text{Et}_2\text{O}$ , 2.5 mL, 7.4 mmol, 2.3 equiv.) over a period of 1 h. The reaction was stirred for 2 h at  $23\text{ }^\circ\text{C}$  then quenched with a saturated aqueous solution of  $\text{NH}_4\text{Cl}$  (5 mL). The aqueous layer was extracted with  $\text{Et}_2\text{O}$  (2  $\times$  10 mL) and the combined organic extracts were then washed with brine (5 mL). The organic layer was then dried over anhydrous  $\text{MgSO}_4$ , filtered, and concentrated by rotary evaporation. The residue was purified by an automated flash chromatography system (0.5  $\rightarrow$  15%



EtOAc/hexanes) providing 0.65 g (69% yield) of silyloxydiene alcohol **2d** as a clear colorless oil: TLC (EtOAc:hexanes, 1:9 v/v):  $R_f = 0.48$ ;  $^1\text{H-NMR}$  (500 MHz;  $\text{CDCl}_3$ ):  $\delta$  6.25 (s, 1H), 4.47 (s, 1H), 4.29 (s, 1H), 2.02 (s, 3H), 1.40 (s, 6H), 1.27-1.20 (m, 3H), 1.09 (d,  $J = 7.5$  Hz, 18H);  $^{13}\text{C NMR}$  (125 MHz;  $\text{CDCl}_3$ ):  $\delta$  158.0, 134.6, 132.8, 91.2, 71.2, 31.4 (2), 18.2 (6), 14.0, 12.9 (3); IR (thin film): 3406, 2945, 2868, 1664, 1593  $\text{cm}^{-1}$ ; HRMS (ESI+)  $m/z$  calcd for  $\text{C}_{17}\text{H}_{35}\text{O}_2\text{Si}$   $[\text{M}+\text{H}]^+$ : 299.2406, found: 299.2420.

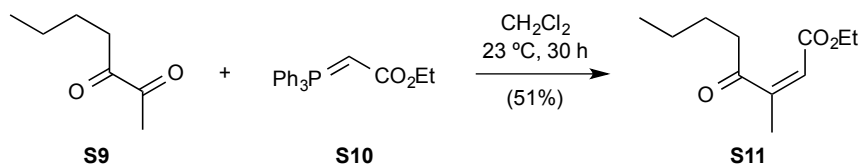

**Ethyl (Z)-3-methyl-4-oxooct-2-enoate (S11):** To a solution of 2,3-heptanedione **S9** (16.8 mL, 120.0 mmol, 1.2 equiv.) in anhydrous  $\text{CH}_2\text{Cl}_2$  (250 mL) was added ethyl (triphenylphosphoranylidene)acetate **S10** (35.0 g, 100.0 mmol, 1.0 equiv.) and stirred at ambient temperature ( $23\text{ }^\circ\text{C}$ ) for 30 h. The mixture was filtered through a short pad of celite and the filtrate was concentrated using rotary evaporation. The residue was then diluted with cold  $\text{Et}_2\text{O}$  (200 mL), filtered through a plug of celite and washed with additional  $\text{Et}_2\text{O}$  (50 mL). The filtrate was concentrated by rotary evaporation and purified by an automated flash chromatography system (5  $\rightarrow$  15% EtOAc/hexanes) providing 10.15 g (51% yield) of ketoester **S11** as a pale yellow oil: TLC (EtOAc:hexanes, 1:9 v/v):  $R_f = 0.59$ ;  $^1\text{H NMR}$  (500 MHz,  $\text{CDCl}_3$ ):  $\delta$  6.52 (q,  $J = 1.5$  Hz, 1H), 4.22 (q,  $J = 7.1$  Hz, 2H), 2.68 (t,  $J = 7.4$  Hz, 2H), 2.20 (d,  $J = 1.5$  Hz, 3H), 1.62-1.56 (m, 2H), 1.36-1.28 (m, 2H), 1.30 (t,  $J = 7.1$  Hz, 3H), 0.90 (t,  $J = 7.4$  Hz, 3H);  $^{13}\text{C NMR}$  (125 MHz;  $\text{CDCl}_3$ ):  $\delta$  202.6, 166.4, 150.8, 125.3, 60.8, 38.1, 26.4, 22.4, 14.3, 14.0, 13.5; IR (thin film): 2961, 2936, 1725, 1687  $\text{cm}^{-1}$ ; HRMS (ESI+)  $m/z$  calcd for  $\text{C}_{11}\text{H}_{18}\text{LiO}_3$   $[\text{M}+\text{Li}]^+$ : 205.1416, found: 205.1424.

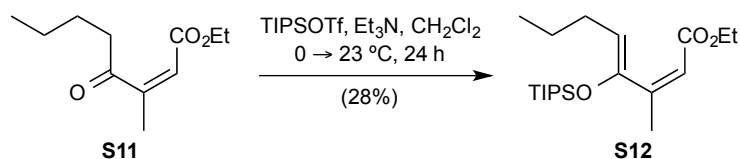

**Ethyl (2Z,4Z)-3-methyl-4-((triisopropylsilyl)oxy)octa-2,4-dienoate (S12):** To a solution of ketoester **S11** (3.51 g, 17.7 mmol, 1.0 equiv.) in anhydrous CH<sub>2</sub>Cl<sub>2</sub> (60 mL) at 0 °C was added Et<sub>3</sub>N (3.7 mL, 26.6 mmol, 1.5 equiv.) dropwise. After stirring for 10 min, TIPSOTf (5.7 mL, 21.2 mmol, 1.2 equiv.) was added over a period of 30 min. The reaction was stirred for 2 h at 0 °C. The mixture was then allowed to warm up to ambient temperature (23 °C) on its own accord and stirred for 22 h. The reaction was quenched with a saturated aqueous solution of NaHCO<sub>3</sub> (30 mL). The aqueous layer was extracted with Et<sub>2</sub>O (2 × 50 mL) and the combined organic extracts were then washed with brine (50 mL). The organic layer was then dried over anhydrous MgSO<sub>4</sub>, filtered, and concentrated by rotary evaporation. The residue was purified by an automated flash chromatography system (5 → 25% CH<sub>2</sub>Cl<sub>2</sub>/hexanes) providing 1.75 g (28% yield) of diene **S12** as a pale yellow oil: TLC (CH<sub>2</sub>Cl<sub>2</sub>:hexanes, 1:4 v/v): R<sub>f</sub> = 0.41; <sup>1</sup>H NMR (500 MHz, CDCl<sub>3</sub>): δ 6.11 (d, *J* = 0.5 Hz, 1H), 5.18 (t, *J* = 7.2 Hz, 1H), 4.16 (q, *J* = 7.1 Hz, 2H), 2.27 (d, *J* = 0.8 Hz, 3H), 2.15 (q, *J* = 7.4 Hz, 2H), 1.40 (q, *J* = 7.5 Hz, 2H), 1.27 (t, *J* = 7.1 Hz, 3H), 1.21-1.14 (m, 3H), 1.09 (d, *J* = 1.9 Hz, 18H), 0.92 (t, *J* = 7.3 Hz, 3H). <sup>13</sup>C NMR (125 MHz; CDCl<sub>3</sub>): δ 167.7, 152.1, 151.3, 115.8, 114.8, 59.7, 28.7, 22.7, 18.1 (6), 15.4, 14.5, 14.1, 13.9 (3); IR (thin film): 2960, 2869, 1716, 1623 cm<sup>-1</sup>; HRMS (MALDI+) *m/z* calcd for C<sub>20</sub>H<sub>39</sub>O<sub>3</sub>Si [M+H]<sup>+</sup>: 355.2668, found: 355.2644.

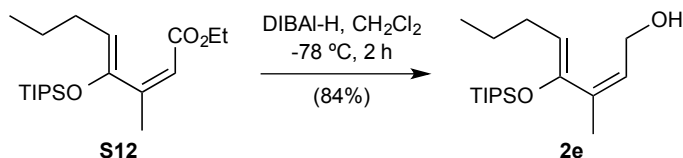

**(2Z,4Z)-3-methyl-4-((triisopropylsilyl)oxy)octa-2,4-dien-1-ol (2e):** To a solution of diene **S12** (1.1 g, 3.1 mmol, 1.0 equiv.) in anhydrous CH<sub>2</sub>Cl<sub>2</sub> (25 mL) at -78 °C was added DIBAL-H (1.0 M solution in CH<sub>2</sub>Cl<sub>2</sub>, 9.3 mL, 3.0 equiv.) dropwise. The reaction was stirred for 2 h at -78 °C then carefully quenched in sequence with H<sub>2</sub>O (0.37 mL), 15% aqueous NaOH (0.37 mL), and H<sub>2</sub>O (0.93 mL). The dry ice/acetone bath was

removed and the mixture was allowed to warm up to ambient temperature (23 °C) on its own accord. Subsequently, anhydrous MgSO<sub>4</sub> was added and the reaction mixture was vigorously stirred for 30 min, filtered through a pad of celite and concentrated by rotary evaporation. The residue was purified by an automated flash chromatography (5 → 20% EtOAc/hexanes) providing 0.80 g (84% yield) of silyloxydiene alcohol **2e** as a clear colorless oil: TLC (EtOAc:hexanes, 1:9 v/v): R<sub>f</sub> = 0.36; <sup>1</sup>H NMR (500 MHz, CDCl<sub>3</sub>): δ 5.95 (td, *J* = 6.8, 0.8 Hz, 1H), 4.84 (t, *J* = 7.1 Hz, 1H), 4.26 (d, *J* = 6.8 Hz, 2H), 2.11 (q, *J* = 7.4 Hz, 2H), 1.79 (d, *J* = 1.1 Hz, 3H), 1.38 (dq, *J* = 14.9, 7.4 Hz, 2H), 1.21-1.16 (m, 3H), 1.10 (d, *J* = 6.8 Hz, 18H), 0.91 (t, *J* = 7.4 Hz, 3H); <sup>13</sup>C NMR (125 MHz; CDCl<sub>3</sub>): δ 151.3, 135.8, 124.5, 110.9, 59.9, 28.4, 23.0, 18.2 (6), 14.3, 14.2, 14.0 (3); IR (thin film): 3332, 2959, 2868, 1626 cm<sup>-1</sup>; HRMS (ESI+) *m/z* calcd for C<sub>18</sub>H<sub>37</sub>O<sub>2</sub>Si [M+H]<sup>+</sup>: 313.2563, found: 313.2571.

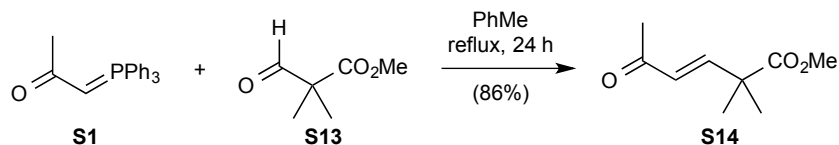

**Methyl (E)-2,2-dimethyl-5-oxohex-3-enoate (S14):** To a solution of 1-(triphenylphosphoranylidene)-2-propanone **S1** (4.32 g, 13.6 mmol, 1.3 equiv.) in anhydrous PhMe (35 mL) was added methyl 2,2-dimethyl-3-oxopropanoate **S13** (1.36 g, 10.5 mmol, 1.0 equiv.), which was freshly prepared from methyl 2,2-dimethyl-3-hydroxypropionate<sup>6</sup> and used immediately without purification, and the mixture was refluxed (115-120 °C) for 24 h. The mixture was filtered through a short pad of celite and the filtrate was concentrated using rotary evaporation. The residue was then diluted with cold Et<sub>2</sub>O (25 mL), filtered through a plug of celite and washed with additional Et<sub>2</sub>O (10 mL). The filtrate was concentrated by rotary evaporation and purified by an automated flash chromatography system (5 → 20% EtOAc/hexanes) providing 1.52 g (86% yield) of ketoester **S14** as a clear colorless oil: TLC (EtOAc:hexanes, 1:9 v/v): R<sub>f</sub> = 0.26; <sup>1</sup>H NMR (500 MHz, CDCl<sub>3</sub>): δ 6.92 (d, *J* = 16.3 Hz, 1H), 6.05 (d, *J* = 16.3 Hz, 1H), 3.68 (s, 3H), 2.25 (s, 3H), 1.34 (s, 6H); <sup>13</sup>C NMR (125 MHz; CDCl<sub>3</sub>): δ 198.7, 175.4, 150.4, 128.8, 52.6, 44.8, 27.3, 24.6 (2); IR (thin film): 2983, 2954, 1734, 1702, 1681, 1626 cm<sup>-1</sup>; HRMS (ESI+) *m/z* calcd for C<sub>9</sub>H<sub>14</sub>LiO<sub>3</sub> [M+Li]<sup>+</sup>: 177.1103, found: 177.1108.

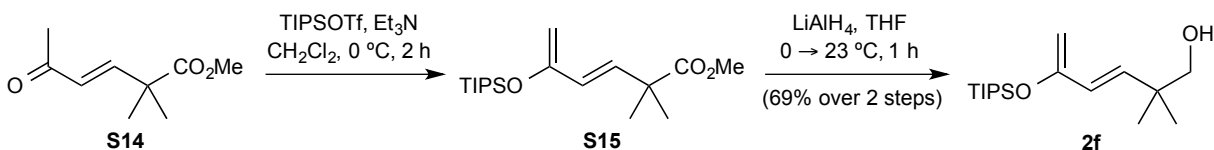

**(E)-2,2-dimethyl-5-((triisopropylsilyl)oxy)hexa-3,5-dien-1-ol (2f):** To a solution of ketoester **S14** (1.52 g, 8.9 mmol, 1.0 equiv.) in anhydrous  $\text{CH}_2\text{Cl}_2$  (45 mL) at 0 °C was added  $\text{Et}_3\text{N}$  (1.5 mL, 10.7 mmol, 1.2 equiv.) dropwise. After stirring for 10 min, TIPSOTf (2.6 mL, 9.6 mmol, 1.1 equiv.) was added over a period of 30 min. The reaction was stirred for 2 h at 0 °C then quenched with a saturated aqueous solution of  $\text{NaHCO}_3$  (20 mL). The aqueous layer was extracted with  $\text{Et}_2\text{O}$  (2  $\times$  50 mL) and the combined organic extracts were then washed with brine (50 mL). The organic layer was then dried over anhydrous  $\text{MgSO}_4$ , filtered, and concentrated by rotary evaporation to afford crude diene **S15** as a pale yellow oil. The crude material was of sufficient purity to be carried on directly to the next step (Note: purification of this compound led to extensive loss of material on  $\text{SiO}_2$ ).

To a solution of crude diene **S15** in anhydrous THF (64 mL) at 0 °C was added  $\text{LiAlH}_4$  (2.0 M solution in THF, 4.5 mL, 1.1 equiv.) dropwise. The reaction was stirred for 30 min at 0 °C then allowed to warm up to ambient temperature (23 °C) and stirred for 30 min. The reaction was then cooled to 0 °C and carefully quenched in sequence with 0.36 mL  $\text{H}_2\text{O}$ , 0.36 mL 15% aqueous  $\text{NaOH}$ , and 0.90 mL  $\text{H}_2\text{O}$ . The ice bath was removed and the mixture was allowed to warm up to ambient temperature (23 °C) on its own accord. Subsequently, anhydrous  $\text{MgSO}_4$  was added and the reaction mixture was vigorously stirred for 30 min, filtered through a pad of celite and concentrated by rotary evaporation. The residue was purified by an automated flash chromatography (5  $\rightarrow$  20%  $\text{EtOAc}$ /hexanes) providing 1.83 g (69% yield over 2 steps) of silyloxydiene alcohol **2f** as a clear colorless oil: TLC ( $\text{EtOAc}$ :hexanes, 1:9 v/v):  $R_f = 0.29$ ;  $^1\text{H}$  NMR (500 MHz,  $\text{CDCl}_3$ ):  $\delta$  6.00 (d,  $J = 15.6$  Hz, 1H), 5.89 (dd,  $J = 15.6, 0.8$  Hz, 1H), 4.29 (s, 1H), 4.25 (s, 1H), 3.35 (s, 2H), 1.27-1.19 (m, 3H), 1.10 (d,  $J = 7.3$  Hz, 18H), 1.05 (s, 6H);  $^{13}\text{C}$  NMR (125 MHz;  $\text{CDCl}_3$ ):  $\delta$  155.2, 137.5, 127.0, 94.5, 71.7, 38.4, 23.9 (2), 18.2 (6), 12.9 (3); IR (thin film): 3377, 2948, 2870, 1593  $\text{cm}^{-1}$ ; HRMS (ESI+)  $m/z$  calcd for  $\text{C}_{17}\text{H}_{35}\text{O}_2\text{Si}$   $[\text{M}+\text{H}]^+$ : 299.2406, found: 299.2413.

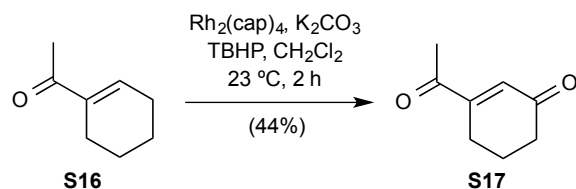

**3-acetylcyclohex-2-en-1-one (S17):** 3-acetylcyclohex-2-en-1-one **S17** was prepared by a modified reported procedure.<sup>7</sup> To a solution of 1-acetyl-1-cyclohexene **S16** (5.2 mL, 40.3 mmol, 1.0 equiv.) in anhydrous  $\text{CH}_2\text{Cl}_2$  (150 mL) was added in sequence  $\text{K}_2\text{CO}_3$  (2.78 g, 20.2 mmol, 0.5 equiv.),  $\text{Rh}_2(\text{cap})_4$  (42 mg, 0.064 mmol, 0.0016 equiv.) and TBHP (5.0-6.0 M solution in decane, 40.0 mL, 201.5 mmol, 5.0 equiv.). The reaction mixture was exposed to air and vigorously stirred at ambient temperature (23 °C) for 2 h. The mixture was filtered through a short pad of  $\text{SiO}_2$  and the filtrate was concentrated using rotary evaporation. Purification by an automated flash chromatography system (5 → 20% EtOAc/hexanes) afforded 2.42 g (44% yield) of diketone **S17** as a yellow oil: TLC (EtOAc:hexanes, 1:9 v/v):  $R_f = 0.20$ ;  $^1\text{H}$  NMR (500 MHz,  $\text{CDCl}_3$ ):  $\delta$  6.55 (t,  $J = 1.7$  Hz, 1H), 2.49 (td,  $J = 6.0, 1.7$  Hz, 2H), 2.44 (t,  $J = 6.8$  Hz, 2H), 2.38 (s, 3H), 2.01 (dt,  $J = 13.1, 6.4$  Hz, 2H);  $^{13}\text{C}$  NMR (125 MHz;  $\text{CDCl}_3$ ):  $\delta$  201.5, 200.2, 154.7, 132.5, 38.0, 26.2, 23.4, 22.0; IR (thin film): 2955, 1681  $\text{cm}^{-1}$ ; HRMS (ESI+)  $m/z$  calcd for  $\text{C}_8\text{H}_{10}\text{LiO}_2$   $[\text{M}+\text{Li}]^+$ : 145.0841, found: 145.0838.

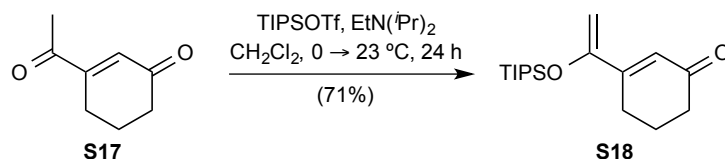

**3-(1-((triisopropylsilyl)oxy)vinyl)cyclohex-2-en-1-one (S18):** To a solution of diketone **S17** (3.28 g, 23.7 mmol, 1.0 equiv.) in anhydrous  $\text{CH}_2\text{Cl}_2$  (100 mL) at 0 °C was added  $\text{EtN}(\text{iPr})_2$  (9.1 mL, 52.2 mmol, 2.2 equiv.) dropwise. After stirring for 10 min, TIPSOTf (7.7 mL, 28.5 mmol, 1.2 equiv.) was added over a period of 30 min. The reaction was stirred for 2 h at 0 °C. The mixture was then allowed to warm up to ambient temperature (23 °C) on its own accord and stirred for 22 h. The reaction was quenched with a saturated aqueous solution of  $\text{NaHCO}_3$  (50 mL). The aqueous layer was extracted with  $\text{Et}_2\text{O}$  (2 × 50 mL) and the combined organic extracts were then washed with brine (50 mL). The organic layer was then dried over anhydrous  $\text{MgSO}_4$ ,

filtered, and concentrated by rotary evaporation. The residue was purified by an automated flash chromatography system (5 → 15% EtOAc/hexanes) providing 4.94 g (71% yield) of diene **S18** as a yellow oil: TLC (EtOAc:hexanes, 1:9 v/v):  $R_f = 0.49$ ;  $^1\text{H}$  NMR (500 MHz,  $\text{CDCl}_3$ ):  $\delta$  6.44 (s, 1H), 4.83 (dd,  $J = 2.1, 0.5$  Hz, 1H), 4.61 (dd,  $J = 2.1, 0.5$  Hz, 1H), 2.48 (td,  $J = 6.1, 1.3$  Hz, 2H), 2.40 (t,  $J = 6.7$  Hz, 2H), 2.06-2.01 (m, 2H), 1.28-1.23 (m, 3H), 1.09 (d,  $J = 7.3$  Hz, 18H);  $^{13}\text{C}$  NMR (125 MHz;  $\text{CDCl}_3$ ):  $\delta$  200.9, 155.2, 155.1, 124.6, 96.9, 37.7, 25.6, 22.7, 18.2 (6), 12.9 (3); IR (thin film): 2945, 2867, 1669  $\text{cm}^{-1}$ ; HRMS (ESI+)  $m/z$  calcd for  $\text{C}_{17}\text{H}_{31}\text{O}_2\text{Si}$   $[\text{M}+\text{H}]^+$ : 295.2093, found: 295.2116.

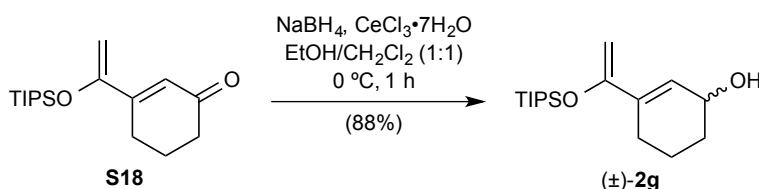

**3-(1-((triisopropylsilyl)oxy)vinyl)cyclohex-2-en-1-ol ((±)-2g):** To a solution of diene **S18** (3.11 g, 10.6 mmol, 1.0 equiv.) in absolute EtOH (105 mL) and anhydrous  $\text{CH}_2\text{Cl}_2$  (105 mL) at 0 °C was added  $\text{CeCl}_3 \cdot 7\text{H}_2\text{O}$  (4.33 g, 11.6 mmol, 1.1 equiv.) in one portion. After stirring for 20 min,  $\text{NaBH}_4$  (1.0 g, 26.4 mmol, 2.5 equiv.) was added portionwise over a period of 30 min. The reaction was stirred for 30 min at 0 °C then quenched with a saturated aqueous solution of  $\text{NaHCO}_3$  (20 mL). The aqueous layer was extracted with  $\text{CH}_2\text{Cl}_2$  (2 × 80 mL) and the combined organic extracts were then washed with brine (20 mL). The organic layer was then dried over anhydrous  $\text{MgSO}_4$ , filtered, and concentrated by rotary evaporation. The residue was purified by an automated flash chromatography system (5 → 15% EtOAc/hexanes) providing 2.75 g (88% yield) of silyloxydiene alcohol (±)-**2g** as a clear colorless oil: TLC (EtOAc:hexanes, 1:9 v/v):  $R_f = 0.46$ ;  $^1\text{H}$  NMR (500 MHz,  $\text{CDCl}_3$ ):  $\delta$  6.30-6.30 (m, 1H), 4.41 (dt,  $J = 1.6, 0.5$  Hz, 1H), 4.33-4.30 (m, 1H), 4.28 (d,  $J = 1.6$  Hz, 1H), 2.22-2.15 (m, 1H), 2.13-2.07 (m, 1H), 1.91-1.86 (m, 1H), 1.83-1.76 (m, 1H), 1.65-1.51 (m, 2H), 1.28-1.20 (m, 3H), 1.10 (d,  $J = 6.7$  Hz, 18H);  $^{13}\text{C}$  NMR (125 MHz;  $\text{CDCl}_3$ ):  $\delta$  156.2, 136.3, 126.8, 91.1, 66.5, 31.9, 25.1, 19.5, 18.3 (6), 13.0 (3); IR (thin film): 3333, 2943, 2867, 1662, 1593  $\text{cm}^{-1}$ ; HRMS (ESI+)  $m/z$  calcd for  $\text{C}_{17}\text{H}_{33}\text{O}_2\text{Si}$   $[\text{M}+\text{H}]^+$ : 297.2250, found: 297.2264.

## DAL optimization studies (Tables S1-S3):

NOTE: The relative and absolute configuration of *trans*-fused bicyclic  $\gamma$ -lactone (+)-**3c'** was unambiguously assigned by X-ray analysis using anomalous dispersion (see **Figure S3**, page 46). Based on this structure, detailed 2D NMR analysis, and computational studies (see **Figure S6**, page 125) which predict the *endo* transition state as the lowest energy pathway, we propose the relative and absolute configurations of bicyclic  $\gamma$ -lactones **3a** and **3a'** as shown in **Table 1a**.

**Catalyst screening studies for the enantioselective DAL process (Table S1):** Into a dried, 2-mL clear-glass vial (12 × 32 mm) equipped with a magnetic stir bar was added silyloxydiene alcohol **2a** (28 mg, 0.10 mmol, 1.0 equiv.), *catalyst* (0.020 mmol, 20 mol%), 2,6-lutidine (35  $\mu$ L, 0.30 mmol, 3.0 equiv.) and anhydrous CH<sub>2</sub>Cl<sub>2</sub> (1.0 mL, to make final concentration of silyloxydiene alcohol 0.1 M) at ambient temperature (23 °C). With vigorous stirring, ethyl fumaroyl chloride **1a** (16  $\mu$ L, 0.12 mmol, 1.2 equiv.) was added dropwise. After stirring for 18 h at ambient temperature (23 °C), the reaction mixture was concentrated by rotary evaporation and purified by an automated flash chromatography (5 → 20% EtOAc/hexanes) to afford an inseparable 1.5:1 mixture of *endo*/*exo* diastereomers (as judged by <sup>1</sup>H NMR) of bicyclic  $\gamma$ -lactones **3a** and **3a'** as a clear colorless oil: TLC (EtOAc:hexanes, 1:9 v/v): R<sub>f</sub> = 0.47. (HPLC data is provided for the 1.5:1 mixture of *endo*/*exo* diastereomers) Enantiomeric excess was determined by chiral HPLC analysis in comparison with authentic racemic material using a Chiralcel OD-H column: hexanes:<sup>i</sup>PrOH = 95:05, flow rate 0.5 mL/min,  $\lambda$  = 210 nm: t<sub>major</sub> = 10.3 min, t<sub>minor</sub> = 10.9 min; t<sub>minor</sub> = 12.7 min, t<sub>major</sub> = 19.4 min. Absolute stereochemistry was assigned by analogy to bicyclic  $\gamma$ -lactone (+)-**3c'**. (NMR data is provided for the 1.5:1 mixture of *endo*/*exo* diastereomers) <sup>1</sup>H NMR (500 MHz; CDCl<sub>3</sub>):  $\delta$  4.78 (s, 1.0H), 4.67 (dd, *J* = 3.3, 2.3 Hz, 1.5H), 4.22-4.06 (m, 5.1H), 3.45 (dd, *J* = 7.6, 2.3 Hz, 1.5H), 3.25-3.22 (m, 2.4H), 2.96-2.93 (m, 1.6H), 2.90-2.85 (m, 0.9H), 2.43 (d, *J* = 16.8 Hz, 1.5H), 2.34 (ddt, *J* = 17.4, 6.5, 2.5 Hz, 1.5H), 2.17-2.08 (m, 2.9H), 1.43 (s, 3.1H), 1.42 (s, 3.3H), 1.32 (s, 4.6H), 1.29 (s, 4.4H), 1.24-1.19 (m, 7.4H), 1.13-1.07 (m, 7.7H), 1.03-1.00 (m, 45.3H). <sup>13</sup>C NMR (125 MHz; CDCl<sub>3</sub>):  $\delta$  176.4, 174.2, 172.9, 172.1, 152.8, 150.9,

101.2, 99.3, 86.2, 84.7, 61.17, 61.16, 46.9, 42.7, 41.5, 40.3, 38.3, 30.5, 30.1, 28.0, 27.6, 27.5, 24.3, 21.0, 17.9 (12), 14.16, 14.08, 12.57 (3), 12.48 (3); IR (thin film): 2945, 2868, 1778, 1769, 1739, 1732, 1666, 1645  $\text{cm}^{-1}$ ; HRMS (ESI+)  $m/z$  calcd for  $\text{C}_{22}\text{H}_{39}\text{O}_5\text{Si}$   $[\text{M}+\text{H}]^+$ : 411.2567, found: 411.2576.

**Table S1.** Catalyst screening studies for the enantioselective DAL process.

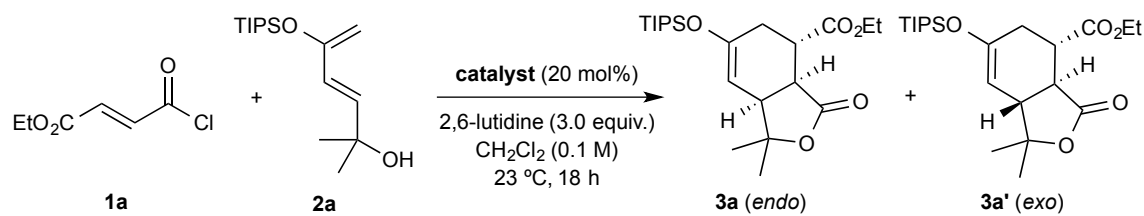

| entry           | catalyst (20 mol%) | temperature (°C) | <i>dr</i> (endo/exo) <sup>¶</sup> | % ee (endo) <sup>§,‡</sup> | yield (%) <sup>⊖</sup> |
|-----------------|--------------------|------------------|-----------------------------------|----------------------------|------------------------|
| 1               | –                  | 23               | 1.2 : 1                           | 0                          | 21                     |
| 2               | <b>A</b>           | 23               | 1.5 : 1                           | 2                          | 40                     |
| 3               | <b>B</b>           | 23               | 1.5 : 1                           | 4                          | 31                     |
| 4               | <b>C</b>           | 23               | 1.5 : 1                           | 7                          | 34                     |
| 5               | <b>D</b>           | 23               | 1.5 : 1                           | 10                         | 52                     |
| 6               | <b>E</b>           | 23               | 1.5 : 1                           | 11                         | 35                     |
| 7               | <b>F</b>           | 23               | 1.5 : 1                           | 82                         | 56                     |
| 8               | <b>G</b>           | 23               | 1.5 : 1                           | 90                         | 64                     |
| 9 <sup>†</sup>  | <b>G</b>           | 23               | 1.5 : 1                           | 95                         | 60                     |
| 10              | <b>H</b>           | 23               | 1.5 : 1                           | 92                         | 63                     |
| 11 <sup>†</sup> | <b>H</b>           | 23               | 1.5 : 1                           | 99                         | 58                     |

<sup>¶</sup> Determined by  $^1\text{H}$  NMR analysis of the crude reaction mixture. <sup>§</sup> Determined by chiral HPLC analysis. <sup>‡</sup> Enantiomeric excess of the major **3a** (endo) diastereomer. <sup>⊖</sup> Isolated yield of the 1.5:1 diastereomeric mixture. <sup>†</sup> Ethyl fumaroyl chloride **1a** in  $\text{CH}_2\text{Cl}_2$  (0.3 mL) was added over a period of 5 h by syringe pump addition.

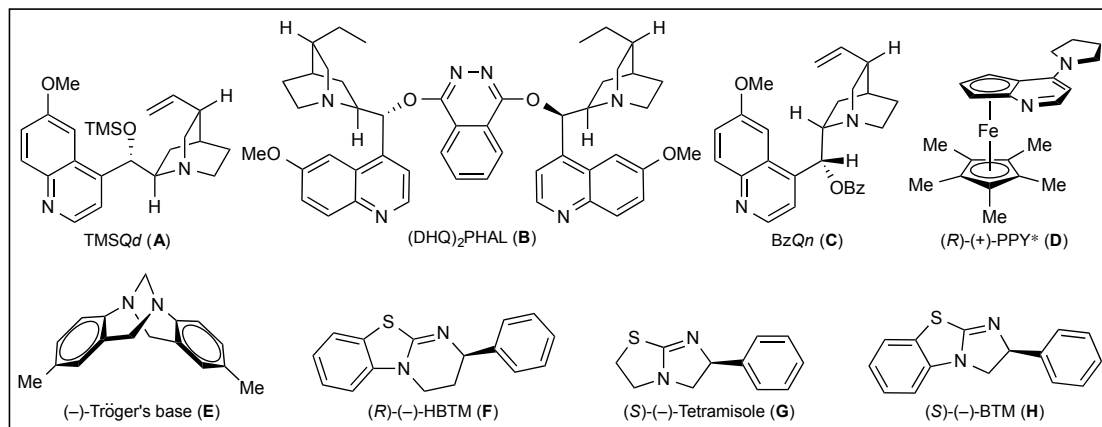

**Base screening studies for the enantioselective DAL process (Table S2):** Into a dried, 2-mL clear-glass vial (12 × 32 mm) equipped with a magnetic stir bar was added silyoxydiene alcohol **2b** (26 mg, 0.10 mmol, 1.0 equiv.), (S)-(-)-BTM (5.0 mg, 0.020



mmol, 20 mol%), *base* (0.30 mmol, 3.0 equiv.) and anhydrous CH<sub>2</sub>Cl<sub>2</sub> (1.0 mL, to make final concentration of silyloxydiene alcohol 0.1 M) at ambient temperature (23 °C). With vigorous stirring, acryloyl chloride **1b** (10 μL, 0.12 mmol, 1.2 equiv.) was added dropwise. After stirring for 18 h at ambient temperature (23 °C), the reaction mixture was filtered through a short pad of celite and the filtrate was concentrated using rotary evaporation. The crude mixture was analyzed by <sup>1</sup>H NMR (500 MHz) and purified by an automated flash chromatography (5 → 20% EtOAc/hexanes) to afford bicyclic γ-lactone (–)-**3b**. All spectral data matched that reported on pages S19-S20.

**Table S2.** Base screening studies for the enantioselective DAL process.

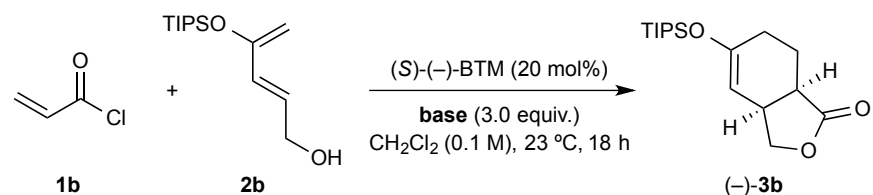

| entry | base                                                   | <i>dr</i> ( <i>endo/exo</i> ) <sup>¶</sup> | <i>ee</i> (%) <sup>§,‡</sup> | conversion (%) <sup>†,¶</sup> |
|-------|--------------------------------------------------------|--------------------------------------------|------------------------------|-------------------------------|
| 1     | –                                                      | <i>n.d.</i>                                | <i>n.d.</i>                  | <5                            |
| 2     | K <sub>2</sub> CO <sub>3</sub>                         | <i>n.d.</i>                                | <i>n.d.</i>                  | <5                            |
| 3     | Et <sub>3</sub> N                                      | 2.4 : 1                                    | 60                           | >95 (60)                      |
| 4     | EtN( <i>t</i> Pr) <sub>2</sub>                         | 2.4 : 1                                    | 65                           | >95 (55)                      |
| 5     | DBU                                                    | 2.1 : 1                                    | 11                           | >95 (30)                      |
| 6     | pyridine                                               | 3.2 : 1                                    | 85                           | >95 (46)                      |
| 7     | 2,6-lutidine                                           | 1 : 1                                      | 99                           | >95 (68)                      |
| 8     | 2,6-di- <i>tert</i> -butylpyridine                     | >19 : 1                                    | 99                           | >95 (43)                      |
| 9     | K <sub>3</sub> PO <sub>4</sub> /2,6-lutidine (20 mol%) | >19 : 1                                    | 99                           | >95 (64)                      |
| 10    | 2-phenylbenzimidazole                                  | 1.7 : 1                                    | 84                           | >95                           |
| 11    | 2-phenylquinoline                                      | 12 : 1                                     | 96                           | >95                           |
| 12    | benzo[ <i>h</i> ]quinoline                             | 2.8 : 1                                    | 96                           | >95                           |
| 13    | acridine                                               | 2.8 : 1                                    | 99                           | >95                           |
| 14    | 1,10-phenanthroline                                    | 4.4 : 1                                    | 97                           | >95                           |
| 15    | 8-(tosylamino)quinoline                                | 6.5 : 1                                    | 96                           | >95                           |
| 16    | 2,6-diphenylpyridine                                   | <i>n.d.</i>                                | <i>n.d.</i>                  | <5                            |

<sup>¶</sup>Determined by <sup>1</sup>H NMR analysis of the crude reaction mixture. <sup>§</sup>Determined by chiral HPLC analysis. <sup>‡</sup>Enantiomeric excess of the major (–)-**3b** (*endo*) diastereomer. <sup>†</sup>Yields in parentheses refer to isolated yields. *n.d.* = not determined.

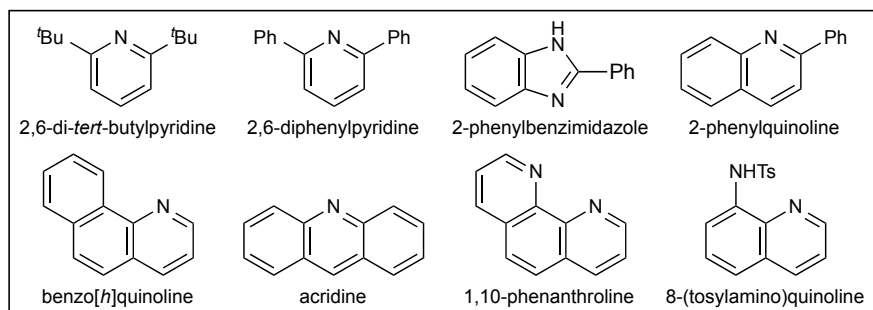

**Solvent screening studies for the enantioselective DAL process (Table S3):** Into a dried, 2-mL clear-glass vial (12 × 32 mm) equipped with a magnetic stir bar was added silyloxydiene alcohol **2b** (26 mg, 0.10 mmol, 1.0 equiv.), (S)-(-)-BTM (5.0 mg, 0.020 mmol, 20 mol%), 2,6-di-*tert*-butylpyridine (0.30 mmol, 3.0 equiv.) and anhydrous *solvent* (1.0 mL, to make final concentration of silyloxydiene alcohol 0.1 M) at ambient temperature (23 °C). With vigorous stirring, acryloyl chloride **1b** (10 μL, 0.12 mmol, 1.2 equiv.) was added dropwise. After stirring for 18 h at ambient temperature (23 °C), the reaction mixture was filtered through a short pad of celite and the filtrate was concentrated using rotary evaporation. The crude mixture of bicyclic  $\gamma$ -lactone (-)-**3b** was analyzed by <sup>1</sup>H NMR (500 MHz) and chiral HPLC. All spectral data matched that reported on pages S19-S20.

**Table S3.** Solvent screening studies for the enantioselective DAL process.

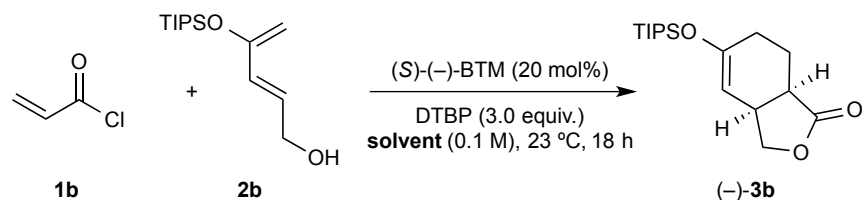

| entry | solvent                          | relative polarity <sup>¶</sup> | <i>dr</i> ( <i>endo</i> / <i>exo</i> ) <sup>Ⓞ</sup> | <i>ee</i> (%) <sup>‡,§</sup> |
|-------|----------------------------------|--------------------------------|-----------------------------------------------------|------------------------------|
| 1     | PhMe <sup>†,€</sup>              | 0.099                          | 8.3 : 1                                             | 92                           |
| 2     | PhH <sup>†,€</sup>               | 0.111                          | 11.7 : 1                                            | 92                           |
| 3     | Et <sub>2</sub> O <sup>†,€</sup> | 0.117                          | 2.8 : 1                                             | 48                           |
| 4     | 1,4-dioxane <sup>†</sup>         | 0.164                          | <i>n.d.</i>                                         | <i>n.d.</i>                  |
| 5     | THF <sup>†</sup>                 | 0.207                          | <i>n.d.</i>                                         | <i>n.d.</i>                  |
| 6     | EtOAc <sup>†</sup>               | 0.228                          | <i>n.d.</i>                                         | <i>n.d.</i>                  |
| 7     | DME <sup>†,€</sup>               | 0.231                          | >19 : 1                                             | 78                           |
| 8     | CHCl <sub>3</sub>                | 0.259                          | >19 : 1                                             | 97                           |
| 9     | CH <sub>2</sub> Cl <sub>2</sub>  | 0.309                          | >19 : 1                                             | 99                           |
| 10    | DCE                              | 0.327                          | >19 : 1                                             | 93                           |
| 11    | acetone <sup>†</sup>             | 0.355                          | <i>n.d.</i>                                         | <i>n.d.</i>                  |
| 12    | DMF                              | 0.386                          | 3.7 : 1                                             | 36                           |
| 13    | DMSO <sup>Δ</sup>                | 0.444                          | <i>n.d.</i>                                         | <i>n.d.</i>                  |
| 14    | MeCN                             | 0.460                          | 2.1 : 1                                             | 67                           |

<sup>¶</sup>The values for relative polarity are normalized from measurements of solvent shifts of absorption spectra and were extracted from Christian Reichardt, *Solvents and Solvent Effects in Organic Chemistry*, Wiley-VCH Publishers, 3<sup>rd</sup> ed., 2003. <sup>Ⓞ</sup>Determined by <sup>1</sup>H NMR analysis of the crude reaction mixture. <sup>‡</sup>Determined by chiral HPLC analysis. <sup>§</sup>Enantiomeric excess of the major (-)-**3b** (*endo*) diastereomer. <sup>†</sup>Instantaneous formation of precipitate (insoluble acylammonium salt) upon addition of acid chloride. <sup>€</sup>Reaction mixture became homogeneous over a period of 18 h. <sup>Δ</sup>Instantaneous exothermic reaction upon addition of acid chloride. *n.d.* = not determined.

**Representative procedure for the enantioselective DAL process as described for bicyclic  $\gamma$ -lactone (–)-**3b**:**

NOTE: The relative and absolute configuration of *trans*-fused bicyclic  $\gamma$ -lactone (+)-**3c'** was unambiguously assigned by X-ray analysis using anomalous dispersion (see **Figure S3**, page 46). Based on this structure, detailed 2D NMR analysis, and computational studies (see **Figure S6**, page 125) which predict the *endo* transition state as the lowest energy pathway, we propose the relative and absolute configurations of bicyclic lactones **3b–j** as shown in **Scheme 1**.

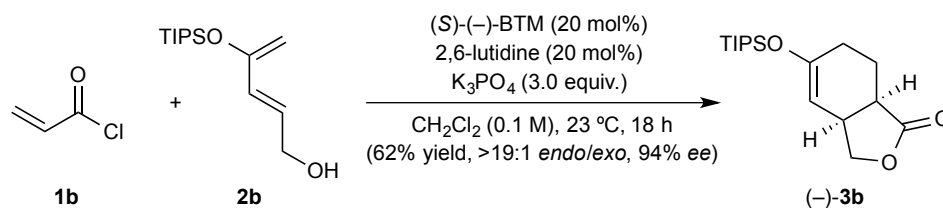

**(3a*S*,7a*R*)-5-((triisopropylsilyl)oxy)-3a,6,7,7a-tetrahydroisobenzofuran-1(3*H*)-on ((–)-**3b**):** To an oven-dried, 25-mL round-bottomed flask equipped with a magnetic stir bar was added silyloxydiene alcohol **2b** (144 mg, 0.56 mmol, 1.0 equiv.), (S)-(-)-BTM (28 mg, 0.11 mmol, 20 mol%), 2,6-lutidine (13  $\mu$ L, 0.11 mmol, 20 mol%),  $K_3PO_4$  (0.36 g, 1.68 mmol, 3.0 equiv.) and anhydrous  $CH_2Cl_2$  (4.0 mL, to make final concentration of silyloxydiene alcohol 0.1 M) at ambient temperature (23 °C). With vigorous stirring, acryloyl chloride **1b** (68  $\mu$ L, 0.84 mmol, 1.5 equiv.) in  $CH_2Cl_2$  (1.6 mL) was added over a period of 5 h by syringe pump addition. After stirring for an additional 13 h, the reaction mixture was filtered through a pad of celite and concentrated by rotary evaporation. Purification by an automated flash chromatography (5  $\rightarrow$  20% EtOAc/hexanes) afforded a single diastereomer (as judged by  $^1H$  NMR) of bicyclic  $\gamma$ -lactone (–)-**3b** (107 mg, 62% yield, 94% ee) as a clear colorless oil: TLC (EtOAc:hexanes, 1:9 v/v):  $R_f$  = 0.34;  $[\alpha]_D^{17.7} = -52.31$  ( $c$  = 1.30,  $CHCl_3$ ). Enantiomeric excess was determined by chiral HPLC analysis in comparison with authentic racemic material using a Chiralcel OD-H column: hexanes: $i$ PrOH = 98:02, flow rate 0.5 mL/min,  $\lambda$  = 210 nm:  $t_{major}$  = 15.9 min,  $t_{minor}$  = 17.9 min; 94% ee. Absolute stereochemistry was assigned by analogy to bicyclic  $\gamma$ -lactone

(+)-**3c'**. <sup>1</sup>H NMR (500 MHz; CDCl<sub>3</sub>): δ 4.77-4.77 (m, 1H), 4.33 (dd, *J* = 8.8, 5.9 Hz, 1H), 3.99 (dd, *J* = 8.8, 2.0 Hz, 1H), 3.17-3.13 (m, 1H), 2.75 (dt, *J* = 7.6, 4.0 Hz, 1H), 2.22-2.14 (m, 2H), 2.03-1.97 (m, 1H), 1.87-1.80 (m, 1H), 1.15-1.11 (m, 3H), 1.06 (dd, *J* = 7.1, 2.9 Hz, 18H); <sup>13</sup>C NMR (125 MHz; CDCl<sub>3</sub>): δ 178.6, 153.8, 102.2, 73.2, 37.7, 35.6, 26.2, 20.7, 18.0 (6), 12.7 (3); IR (thin film): 2944, 2867, 1775, 1665 cm<sup>-1</sup>; HRMS (ESI+) *m/z* calcd for C<sub>17</sub>H<sub>30</sub>LiO<sub>3</sub>Si [M+Li]<sup>+</sup>: 317.2124, found: 317.2119.

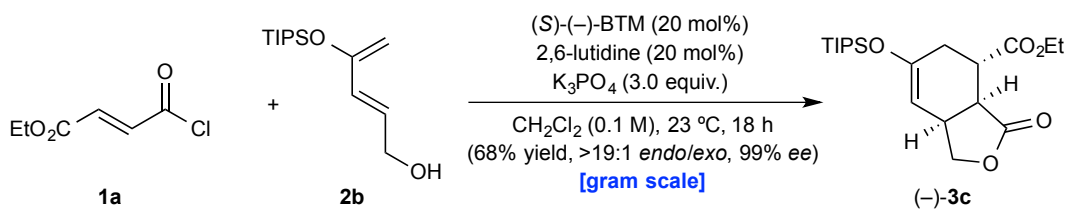

**Ethyl (3a*S*,4*S*,7a*S*)-3-oxo-6-((triisopropylsilyl)oxy)-1,3,3a,4,5,7a-hexahydroisobenzofuran-4-carboxylate ((-)-**3c**):** Prepared according to the representative procedure using silyloxydiene alcohol **2b** (1.44 g, 5.6 mmol, 1.0 equiv.), (*S*)-(-)-BTM (283 mg, 1.1 mmol, 20 mol%), 2,6-lutidine (0.13 mL, 1.1 mmol, 20 mol%), K<sub>3</sub>PO<sub>4</sub> (3.6 g, 16.8 mmol, 3.0 equiv.) in anhydrous CH<sub>2</sub>Cl<sub>2</sub> (40 mL, to make final concentration of silyloxydiene alcohol 0.1 M) and ethyl fumaroyl chloride **1a** (0.97 mL, 7.3 mmol, dissolved in 16 mL CH<sub>2</sub>Cl<sub>2</sub>, 1.3 equiv.) at ambient temperature (23 °C). Upon completion (as judged by TLC), the reaction mixture was purified by an automated flash chromatography (5 → 20% EtOAc/hexanes) to afford a single diastereomer (as judged by <sup>1</sup>H NMR) of bicyclic  $\gamma$ -lactone (-)-**3c** (1.46 g, 68% yield, 99% ee) and ester **S19** (0.41 g, 19% yield) shown below.

(-)-**3c**: clear colorless oil; TLC (EtOAc:hexanes, 1:9 *v/v*): R<sub>f</sub> = 0.49; [ $\alpha$ ]<sub>D</sub><sup>22.1</sup> = -81.33 (*c* = 3.00, CHCl<sub>3</sub>). Enantiomeric excess was determined by chiral HPLC analysis in comparison with authentic racemic material using a Chiralcel OD-H column: hexanes:*i*PrOH = 95:05, flow rate 0.5 mL/min,  $\lambda$  = 210 nm: *t*<sub>minor</sub> = 15.4 min, *t*<sub>major</sub> = 18.1 min; 99% ee. Absolute stereochemistry was assigned by analogy to bicyclic  $\gamma$ -lactone (+)-**3c'**. <sup>1</sup>H NMR (500 MHz; CDCl<sub>3</sub>): δ 4.73 (t, *J* = 2.5 Hz, 1H), 4.37 (dd, *J* = 8.8, 5.6 Hz, 1H), 4.22-4.09 (m, 2H), 4.03 (d, *J* = 8.8 Hz, 1H), 3.30-3.26 (m, 2H), 3.20 (dd, *J* = 7.3, 2.3 Hz, 1H), 2.49 (dd, *J* = 17.7, 1.4 Hz, 1H), 2.39 (ddt, *J* = 17.7, 6.9, 2.4 Hz, 1H), 1.25 (t,

$J = 7.1$  Hz, 3H), 1.16-1.09 (m, 3H), 1.04 (d,  $J = 6.4$  Hz, 18H);  $^{13}\text{C}$  NMR (125 MHz;  $\text{CDCl}_3$ ):  $\delta$  177.2, 172.9, 151.3, 101.7, 73.3, 61.3, 39.4, 37.8, 34.1, 27.9, 17.9 (6), 14.1, 12.6 (3); IR (thin film): 2945, 2867, 1773, 1732, 1668  $\text{cm}^{-1}$ ; HRMS (ESI+)  $m/z$  calcd for  $\text{C}_{20}\text{H}_{34}\text{NaO}_5\text{Si}$   $[\text{M}+\text{Na}]^+$ : 405.2068, found: 405.2088.

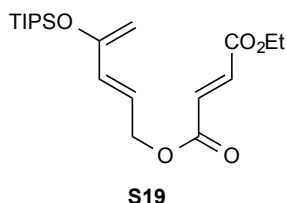

**Ethyl ((E)-4-((triisopropylsilyl)oxy)penta-2,4-dien-1-yl) fumarate (S19):** pale yellow oil; TLC (EtOAc:hexanes, 1:9 v/v):  $R_f = 0.78$ .  $^1\text{H}$  NMR (500 MHz;  $\text{CDCl}_3$ ):  $\delta$  6.92-6.80 (m, 2H), 6.16-6.08 (m, 2H), 4.77 (d,  $J = 4.8$  Hz, 2H), 4.37 (s, 1H), 4.32 (s, 1H), 4.26 (q,  $J = 7.1$  Hz, 2H), 1.32 (t,  $J = 7.1$  Hz, 3H), 1.27-1.20 (m, 3H), 1.10 (d,  $J = 7.3$  Hz, 18H);  $^{13}\text{C}$  NMR (125 MHz;  $\text{CDCl}_3$ ):  $\delta$  165.1, 164.8, 154.3, 134.1, 133.5, 132.3, 123.1, 96.3, 65.1, 61.5, 18.2 (6), 14.3, 12.9 (3); IR (thin film): 2946, 2869, 1727, 1594  $\text{cm}^{-1}$ ; HRMS (ESI+)  $m/z$  calcd for  $\text{C}_{20}\text{H}_{34}\text{LiO}_5\text{Si}$   $[\text{M}+\text{Li}]^+$ : 389.2336, found: 389.2332.

**Use of a lower catalyst loading for the DAL (10 mol%) as described for bicyclic  $\gamma$ -lactone (–)-3c:** This reaction was performed according to the procedure described above for (–)-3c with the exception that a lower catalyst loading (10 vs. 20 mol%), a lower “shuttle” base loading (10 vs. 20 mol%) and a longer addition time (10 vs. 5 h) were employed. Silyloxydiene alcohol **2b** (100 mg, 0.39 mmol, 1.0 equiv.), (S)-(–)-BTM (10 mg, 0.039 mmol, 10 mol%), 2,6-lutidine (4.5  $\mu\text{L}$ , 0.039 mmol, 10 mol%),  $\text{K}_3\text{PO}_4$  (248 mg, 1.2 mmol, 3.0 equiv.) in anhydrous  $\text{CH}_2\text{Cl}_2$  (3.0 mL, to make final concentration of silyloxydiene alcohol 0.1 M) and ethyl fumaroyl chloride **1a** (68  $\mu\text{L}$ , 0.51 mmol, dissolved in 0.9 mL  $\text{CH}_2\text{Cl}_2$ , 1.3 equiv.). The solution of ethyl fumaroyl chloride **1a** was added by syringe pump over 10 h and the reaction was allowed to stir for 8 h at ambient temperature (23  $^\circ\text{C}$ ). Upon completion (as judged by TLC), the reaction mixture was purified by an automated flash chromatography (5  $\rightarrow$  20% EtOAc/hexanes) to afford a single diastereomer (as judged by  $^1\text{H}$  NMR) of bicyclic  $\gamma$ -lactone (–)-3c (59 mg, 40% yield, 98% ee) and ester **S19** (34 mg, 23% yield). Enantiomeric excess was determined by chiral HPLC analysis in comparison with authentic racemic material using a Chiralcel OD-H column: hexanes: $i$ -PrOH = 95:05, flow rate 0.5 mL/min,  $\lambda = 210$  nm:  $t_{\text{minor}} = 15.3$  min,  $t_{\text{major}} = 18.2$  min; 98% ee. All spectral data matched that reported above.

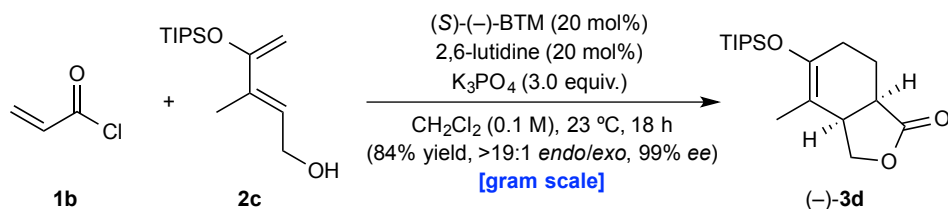

**(3a*R*,7a*R*)-4-methyl-5-((triisopropylsilyl)oxy)-3a,6,7,7a-tetrahydroisobenzofuran-**

**1(3*H*)-one ((-)-3d):** Prepared according to the representative procedure using silyloxydiene alcohol **2c** (4.0 g, 14.8 mmol, 1.0 equiv.), (*S*)-(-)-BTM (747 mg, 2.9 mmol, 20 mol%), 2,6-lutidine (0.34 mL, 2.9 mmol, 20 mol%), K<sub>3</sub>PO<sub>4</sub> (9.4 g, 44.4 mmol, 3.0 equiv.) in anhydrous CH<sub>2</sub>Cl<sub>2</sub> (130 mL, to make final concentration of silyloxydiene alcohol 0.1 M) and acryloyl chloride **1b** (1.8 mL, 22.2 mmol, dissolved in 18 mL CH<sub>2</sub>Cl<sub>2</sub>, 1.5 equiv.) at ambient temperature (23 °C). Upon completion (as judged by TLC), the reaction mixture was purified by an automated flash chromatography (5 → 20% EtOAc/hexanes) to afford a single diastereomer (as judged by <sup>1</sup>H NMR) of bicyclic γ-lactone (-)-**3d** (4.03 g, 84% yield, 99% ee) as a clear colorless oil: TLC (EtOAc:hexanes, 1:9 v/v): R<sub>f</sub> = 0.37; [ $\alpha$ ]<sub>D</sub><sup>20.3</sup> = -87.50 (c = 1.60, CHCl<sub>3</sub>). Enantiomeric excess was determined by chiral HPLC analysis in comparison with authentic racemic material using a Chiralcel AS-H column: hexanes:<sup>i</sup>PrOH = 99:01, flow rate 1.0 mL/min, λ = 210 nm: t<sub>major</sub> = 10.3 min, t<sub>minor</sub> = 11.5 min; 99% ee. Absolute stereochemistry was assigned by analogy to bicyclic γ-lactone (+)-**3c'**. <sup>1</sup>H NMR (500 MHz; CDCl<sub>3</sub>): δ 4.32 (dd, J = 9.0, 6.5 Hz, 1H), 4.14 (dd, J = 9.0, 3.1 Hz, 1H), 3.04-3.01 (m, 1H), 2.77 (dt, J = 7.7, 5.0 Hz, 1H), 2.24-2.17 (m, 1H), 2.13-2.08 (m, 1H), 2.07-2.01 (m, 1H), 1.86-1.79 (m, 1H), 1.66 (s, 3H), 1.14-1.09 (m, 3H), 1.06 (dd, J = 6.6, 2.1 Hz, 18H); <sup>13</sup>C NMR (125 MHz; CDCl<sub>3</sub>): δ 178.9, 146.8, 107.7, 71.2, 40.6, 38.5, 27.0, 21.2, 18.1 (6), 14.2, 13.3 (3); IR (thin film): 2944, 2867, 1775, 1677 cm<sup>-1</sup>; HRMS (ESI+) *m/z* calcd for C<sub>18</sub>H<sub>32</sub>NaO<sub>3</sub>Si [M+Na]<sup>+</sup>: 347.2018, found: 347.2024.

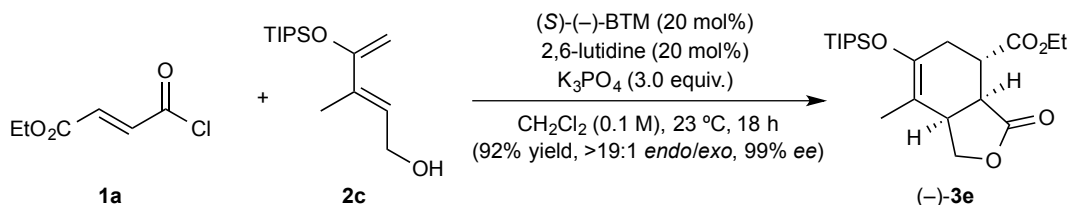

**Ethyl (3*a*S,4*S*,7*a*R)-7-methyl-3-oxo-6-((triisopropylsilyl)oxy)-1,3,3*a*,4,5,7*a*-hexahydroisobenzofuran-4-carboxylate ((-)-**3e**):** Prepared according to the representative procedure using silyloxydiene alcohol **2c** (50 mg, 0.19 mmol, 1.0 equiv.), (*S*)-(-)-BTM (9.3 mg, 0.037 mmol, 20 mol%), 2,6-lutidine (4.3  $\mu\text{L}$ , 0.037 mmol, 20 mol%),  $\text{K}_3\text{PO}_4$  (98 mg, 0.46 mmol, 3.0 equiv.) in anhydrous  $\text{CH}_2\text{Cl}_2$  (1.0 mL, to make final concentration of silyloxydiene alcohol 0.1 M) and ethyl fumaroyl chloride **1a** (37  $\mu\text{L}$ , 0.28 mmol, dissolved in 0.9 mL  $\text{CH}_2\text{Cl}_2$ , 1.5 equiv.) at ambient temperature (23  $^\circ\text{C}$ ). Upon completion (as judged by TLC), the reaction mixture was purified by an automated flash chromatography (5  $\rightarrow$  20% EtOAc/hexanes) to afford a single diastereomer (as judged by  $^1\text{H}$  NMR) of bicyclic  $\gamma$ -lactone (-)-**3e** (67 mg, 92% yield, 99% *ee*) as a clear colorless oil: TLC (EtOAc:hexanes, 1:4 *v/v*):  $R_f = 0.62$ ;  $[\alpha]_D^{20.2} = -78.86$  ( $c = 3.50$ ,  $\text{CHCl}_3$ ). Enantiomeric excess was determined by chiral HPLC analysis in comparison with authentic racemic material using a Chiralcel OD-H column: hexanes: $^i\text{PrOH} = 98:02$ , flow rate 0.4 mL/min,  $\lambda = 210 \text{ nm}$ :  $t_{\text{major}} = 20.0 \text{ min}$ ,  $t_{\text{minor}} = 21.3 \text{ min}$ ; 99% *ee*. Absolute stereochemistry was assigned by analogy to bicyclic  $\gamma$ -lactone (+)-**3c'**.  $^1\text{H}$  NMR (500 MHz;  $\text{CDCl}_3$ ):  $\delta$  4.33 (dd,  $J = 9.1, 6.0 \text{ Hz}$ , 1H), 4.23-4.20 (m, 1H), 4.20-4.08 (m, 2H), 3.24 (ddd,  $J = 7.5, 3.2, 1.2 \text{ Hz}$ , 1H), 3.22-3.20 (m, 1H), 3.19-3.16 (m, 1H), 2.51 (ddq,  $J = 17.1, 2.4, 1.2 \text{ Hz}$ , 1H), 2.43 (ddquint,  $J = 17.1, 6.5, 2.3 \text{ Hz}$ , 1H), 1.63 (t,  $J = 0.9 \text{ Hz}$ , 3H), 1.25 (t,  $J = 7.1 \text{ Hz}$ , 3H), 1.16-1.10 (m, 3H), 1.05 (dd,  $J = 6.9, 3.3 \text{ Hz}$ , 18H);  $^{13}\text{C}$  NMR (125 MHz;  $\text{CDCl}_3$ ):  $\delta$  177.5, 172.8, 144.2, 107.4, 71.0, 61.3, 40.0, 39.2, 38.0, 28.5, 18.0 (6), 14.1, 13.9, 13.2 (3); IR (thin film): 2945, 2868, 1777, 1732, 1679  $\text{cm}^{-1}$ ; HRMS (ESI+)  $m/z$  calcd for  $\text{C}_{21}\text{H}_{37}\text{O}_5\text{Si}$   $[\text{M}+\text{H}]^+$ : 397.2410, found: 397.2432.

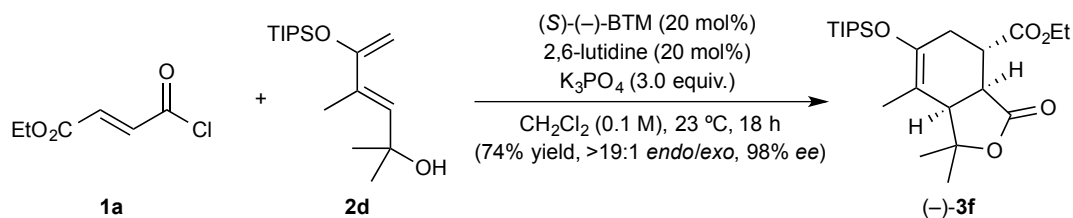

**Ethyl (3a*S*,4*S*,7a*R*)-1,1,7-trimethyl-3-oxo-6-((triisopropylsilyl)oxy)-1,3,3a,4,5,7a-hexahydroisobenzofuran-4-carboxylate ((-)-3f):** Prepared according to the representative procedure using silyloxydiene alcohol **2d** (30 mg, 0.10 mmol, 1.0 equiv.), (S)-(-)-BTM (5.0 mg, 0.020 mmol, 20 mol%), 2,6-lutidine (2.3  $\mu\text{L}$ , 0.020 mmol, 20 mol%),  $\text{K}_3\text{PO}_4$  (64 mg, 0.30 mmol, 3.0 equiv.) in anhydrous  $\text{CH}_2\text{Cl}_2$  (0.7 mL, to make final concentration of silyloxydiene alcohol 0.1 M) and ethyl fumaroyl chloride **1a** (20  $\mu\text{L}$ , 0.15 mmol, dissolved in 0.3 mL  $\text{CH}_2\text{Cl}_2$ , 1.5 equiv.) at ambient temperature (23  $^\circ\text{C}$ ). Upon completion (as judged by TLC), the reaction mixture was purified by an automated flash chromatography (5  $\rightarrow$  20% EtOAc/hexanes) to afford a single diastereomer (as judged by  $^1\text{H}$  NMR) of bicyclic  $\gamma$ -lactone (-)-**3f** (25 mg, 74% yield, 98% ee) as a clear colorless oil: TLC (EtOAc:hexanes, 1:9 v/v):  $R_f = 0.35$ ;  $[\alpha]_D^{18.4} = -25.60$  ( $c = 2.50$ ,  $\text{CHCl}_3$ ). Enantiomeric excess was determined by chiral HPLC analysis in comparison with authentic racemic material using a Chiralcel OD-H column: hexanes: $i$ PrOH = 95:05, flow rate 0.5 mL/min,  $\lambda = 210$  nm:  $t_{\text{major}} = 11.6$  min,  $t_{\text{minor}} = 13.6$  min; 98% ee. Absolute stereochemistry was assigned by analogy to bicyclic  $\gamma$ -lactone (+)-**3c'**.  $^1\text{H}$  NMR (500 MHz;  $\text{CDCl}_3$ ):  $\delta$  4.17 (q,  $J = 7.1$  Hz, 2H), 3.37 (ddd,  $J = 9.1, 6.3, 0.9$  Hz, 1H), 3.10 (q,  $J = 5.9$  Hz, 1H), 2.92 (d,  $J = 9.5$  Hz, 1H), 2.50 (ddd,  $J = 16.4, 5.6, 1.2$  Hz, 1H), 2.30 (ddt,  $J = 16.4, 5.4, 1.8$  Hz, 1H), 1.65 (s, 3H), 1.52 (s, 3H), 1.34 (s, 3H), 1.25 (t,  $J = 7.1$  Hz, 3H), 1.15-1.10 (m, 3H), 1.08 (d,  $J = 6.8$  Hz, 18H);  $^{13}\text{C}$  NMR (125 MHz;  $\text{CDCl}_3$ ):  $\delta$  176.5, 172.9, 145.5, 107.1, 87.5, 61.3, 49.3, 42.0, 40.5, 30.4, 30.3, 25.3, 18.1 (6), 17.0, 14.3, 13.3 (3); IR (thin film): 2945, 2868, 1768, 1735, 1671  $\text{cm}^{-1}$ ; HRMS (ESI+)  $m/z$  calcd for  $\text{C}_{23}\text{H}_{41}\text{O}_5\text{Si}$   $[\text{M}+\text{H}]^+$ : 425.2723, found: 425.2705.



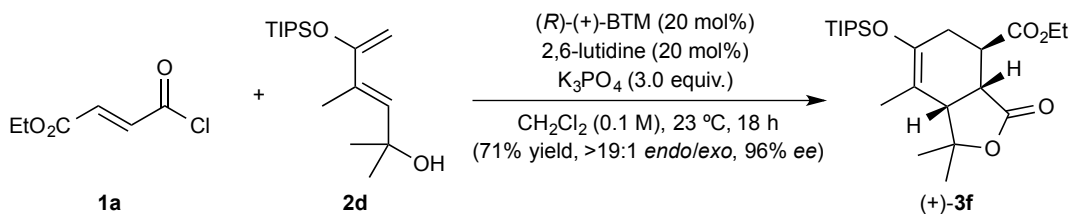

**Ethyl (3a*R*,4*R*,7a*S*)-1,1,7-trimethyl-3-oxo-6-((triisopropylsilyl)oxy)-1,3,3a,4,5,7a-hexahydroisobenzofuran-4-carboxylate ((+)-3f):** Prepared according to the representative procedure using silyloxydiene alcohol **2d** (554 mg, 1.86 mmol, 1.0 equiv.), (*R*)-(+)-BTM (94 mg, 0.37 mmol, 20 mol%), 2,6-lutidine (43  $\mu$ L, 0.37 mmol, 20 mol%),  $K_3PO_4$  (1.20 g, 5.57 mmol, 3.0 equiv.) in anhydrous  $CH_2Cl_2$  (13 mL, to make final concentration of silyloxydiene alcohol 0.1 M) and ethyl fumaroyl chloride **1a** (0.37 mL, 2.78 mmol, dissolved in 5.5 mL  $CH_2Cl_2$ , 1.5 equiv.) at ambient temperature (23  $^{\circ}C$ ). Upon completion (as judged by TLC), the reaction mixture was purified by an automated flash chromatography (5  $\rightarrow$  20% EtOAc/hexanes) to afford a single diastereomer (as judged by  $^1H$  NMR) of bicyclic  $\gamma$ -lactone (+)-**3f** (558 mg, 71% yield, 96% ee) as a clear colorless oil:  $[\alpha]_D^{19.0} = +27.83$  ( $c = 2.30$ ,  $CHCl_3$ ). Enantiomeric excess was determined by chiral HPLC analysis in comparison with authentic racemic material using a Chiralcel OD-H column: hexanes:*i*PrOH = 95:05, flow rate 0.5 mL/min,  $\lambda = 210$  nm:  $t_{minor} = 11.4$  min,  $t_{major} = 13.5$  min; 96% ee. Absolute stereochemistry was assigned by analogy to bicyclic  $\gamma$ -lactone (+)-**3c'**. All spectral data matched that reported above.

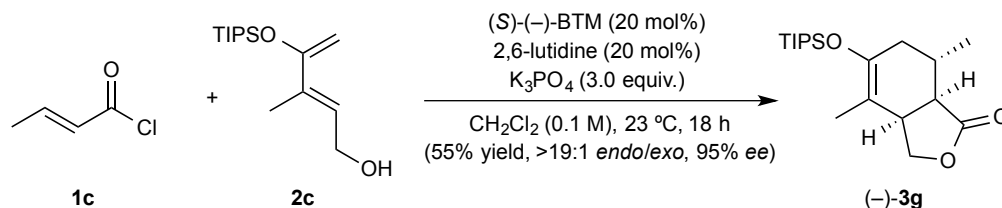

**(3a*R*,7*S*,7a*R*)-4,7-dimethyl-5-((triisopropylsilyl)oxy)-3a,6,7,7a-tetrahydroisobenzofuran-1(3*H*)-one ((-)-3g):** Prepared according to the representative procedure using silyloxydiene alcohol **2c** (287 mg, 1.06 mmol, 1.0 equiv.), (*S*)-(-)-BTM (53 mg, 0.21 mmol, 20 mol%), 2,6-lutidine (25  $\mu$ L, 0.21 mmol, 20 mol%),  $K_3PO_4$  (675 mg, 3.18 mmol, 3.0 equiv.) in anhydrous  $CH_2Cl_2$  (7.5 mL, to make final concentration of silyloxydiene alcohol 0.1 M) and crotonoyl chloride **1c** (0.15 mL, 1.6 mmol, dissolved in 2.5 mL

CH<sub>2</sub>Cl<sub>2</sub>, 1.5 equiv.) at ambient temperature (23 °C). Upon completion (as judged by TLC), the reaction mixture was purified by an automated flash chromatography (5 → 20% EtOAc/hexanes) to afford a single diastereomer (as judged by <sup>1</sup>H NMR) of bicyclic γ-lactone (–)-**3g** (197 mg, 55% yield, 95% ee) as a clear colorless oil: TLC (EtOAc:hexanes, 1:9 v/v): R<sub>f</sub> = 0.43; [α]<sub>D</sub><sup>20.5</sup> = –64.57 (c = 7.00, CHCl<sub>3</sub>). Enantiomeric excess was determined by chiral HPLC analysis in comparison with authentic racemic material using a Chiralcel OD-H column: hexanes:<sup>i</sup>PrOH = 98:02, flow rate 0.5 mL/min, λ = 210 nm: t<sub>minor</sub> = 16.0 min, t<sub>major</sub> = 17.0 min; 95% ee. Absolute stereochemistry was assigned by analogy to bicyclic γ-lactone (+)-**3c'**. <sup>1</sup>H NMR (500 MHz; CDCl<sub>3</sub>): δ 4.33 (dd, J = 8.8, 6.7 Hz, 1H), 4.09 (dd, J = 8.8, 4.7 Hz, 1H), 2.99 (q, J = 5.8 Hz, 1H), 2.39 (t, J = 6.8 Hz, 1H), 2.33–2.30 (m, 1H), 2.29–2.27 (m, 1H), 1.85–1.80 (m, 1H), 1.63 (s, 3H), 1.13–1.09 (m, 6H), 1.05 (dd, J = 6.7, 2.3 Hz, 18H); <sup>13</sup>C NMR (125 MHz; CDCl<sub>3</sub>): δ 178.3, 144.9, 106.4, 71.5, 44.6, 39.8, 35.2, 26.9, 19.2, 18.1 (6), 13.9, 13.2 (3); IR (thin film): 2945, 2868, 1772, 1678 cm<sup>-1</sup>; HRMS (ESI+) *m/z* calcd for C<sub>19</sub>H<sub>35</sub>O<sub>3</sub>Si [M+H]<sup>+</sup>: 339.2355, found: 339.2382.

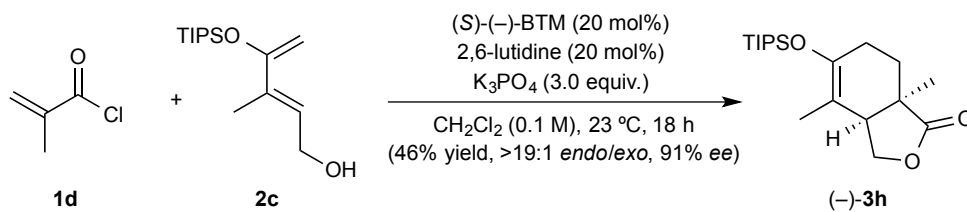

**(3a*S*,7a*R*)-4,7a-dimethyl-5-((triisopropylsilyl)oxy)-3a,6,7,7a-tetrahydroisobenzofuran-1(3*H*)-one ((–)-**3h**):** Prepared by a modified representative procedure. To an oven-dried, 50-mL round-bottomed flask equipped with a magnetic stir bar was added (S)-(-)-BTM (87 mg, 0.34 mmol, 20 mol%), 2,6-lutidine (40 μL, 0.34 mmol, 20 mol%), K<sub>3</sub>PO<sub>4</sub> (1.10 g, 5.16 mmol, 3.0 equiv.) and anhydrous CH<sub>2</sub>Cl<sub>2</sub> (10 mL, to make final concentration of silyloxydiene alcohol 0.07 M) at ambient temperature (23 °C). With vigorous stirring, silyloxydiene alcohol **2c** (464 mg, 1.72 mmol, 1.0 equiv.) in CH<sub>2</sub>Cl<sub>2</sub> (3.5 mL) and methacryloyl chloride **1d** (0.25 mL, 2.58 mmol, 1.5 equiv.) in CH<sub>2</sub>Cl<sub>2</sub> (3.5 mL) were simultaneously added over a period of 8 h using two separate syringe pumps. After stirring for an additional 10 h, the reaction mixture was filtered through a pad of

celite and concentrated by rotary evaporation. Purification by an automated flash chromatography (5 → 20% EtOAc/hexanes) afforded a single diastereomer (as judged by <sup>1</sup>H NMR) of bicyclic  $\gamma$ -lactone (–)-**3h** (266 mg, 46% yield, 91% ee) as a clear colorless oil: TLC (EtOAc:hexanes, 1:9 v/v): R<sub>f</sub> = 0.45; [ $\alpha$ ]<sub>D</sub><sup>20.4</sup> = –60.00 (c = 0.40, CHCl<sub>3</sub>). Enantiomeric excess was determined by chiral HPLC analysis in comparison with authentic racemic material using a Chiralcel AS-H column: hexanes:<sup>i</sup>PrOH = 98:02, flow rate 0.5 mL/min,  $\lambda$  = 210 nm: t<sub>major</sub> = 11.8 min, t<sub>minor</sub> = 14.0 min; 91% ee. Absolute stereochemistry was assigned by analogy to bicyclic  $\gamma$ -lactone (+)-**3c'**. <sup>1</sup>H NMR (500 MHz; CDCl<sub>3</sub>):  $\delta$  4.45 (dd, *J* = 8.9, 7.3 Hz, 1H), 3.97 (dd, *J* = 8.9, 6.2 Hz, 1H), 2.63 (t, *J* = 6.7 Hz, 1H), 2.17-2.13 (m, 2H), 1.94 (ddd, *J* = 13.2, 7.3, 5.9 Hz, 1H), 1.64 (s, 3H), 1.63-1.59 (m, 1H), 1.25 (s, 3H), 1.15-1.11 (m, 3H), 1.08 (d, *J* = 6.3 Hz, 18H); <sup>13</sup>C NMR (125 MHz; CDCl<sub>3</sub>):  $\delta$  181.7, 145.6, 107.7, 70.6, 47.8, 41.1, 28.6, 26.7, 21.5, 18.1 (6), 17.8, 13.3 (3); IR (thin film): 2944, 2867, 1776, 1680 cm<sup>-1</sup>; HRMS (ESI+) *m/z* calcd for C<sub>19</sub>H<sub>34</sub>NaO<sub>3</sub>Si [M+Na]<sup>+</sup>: 361.2175, found: 361.2181.

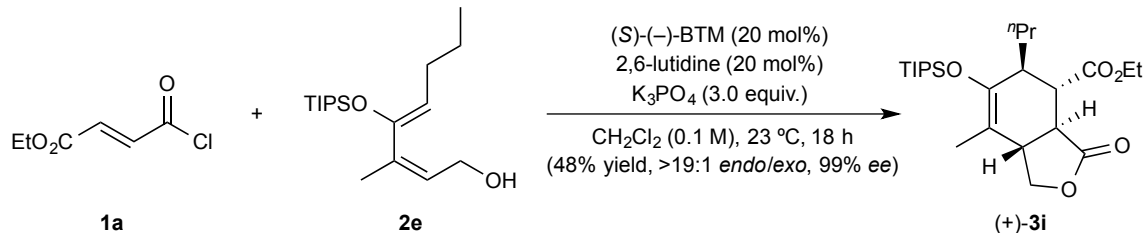

**Ethyl (3a*S*,4*S*,5*S*,7a*S*)-7-methyl-3-oxo-5-propyl-6-((triisopropylsilyl)oxy)-1,3,3a,4,5,7a-hexahydroisobenzofuran-4-carboxylate ((+)-**3i**):** Prepared according to the representative procedure using silyloxydiene alcohol **2e** (740 mg, 2.37 mmol, 1.0 equiv.), (S)-(-)-BTM (120 mg, 0.47 mmol, 20 mol%), 2,6-lutidine (55  $\mu$ L, 0.47 mmol, 20 mol%), K<sub>3</sub>PO<sub>4</sub> (1.50 g, 7.11 mmol, 3.0 equiv.) in anhydrous CH<sub>2</sub>Cl<sub>2</sub> (17 mL, to make final concentration of silyloxydiene alcohol 0.1 M) and ethyl fumaroyl chloride **1a** (0.47 mL, 3.56 mmol, dissolved in 6.0 mL CH<sub>2</sub>Cl<sub>2</sub>, 1.5 equiv.) at ambient temperature (23 °C). Upon completion (as judged by TLC), the reaction mixture was purified by an automated flash chromatography (5 → 20% EtOAc/hexanes) to afford a single diastereomer (as judged by <sup>1</sup>H NMR) of bicyclic  $\gamma$ -lactone (+)-**3i** (496 mg, 48% yield, 99% ee) as a clear

colorless oil: TLC (EtOAc:hexanes, 1:9 v/v):  $R_f = 0.44$ ;  $[\alpha]_D^{19.0} = +61.33$  ( $c = 1.50$ ,  $\text{CHCl}_3$ ). Enantiomeric excess was determined by chiral HPLC analysis in comparison with authentic racemic material using a Chiralcel AD-H column: hexanes:*i*PrOH = 95:05, flow rate 0.5 mL/min,  $\lambda = 210$  nm:  $t_{\text{major}} = 11.4$  min,  $t_{\text{minor}} = 12.7$  min; 99% ee. The relative stereochemistry of bicyclic  $\gamma$ -lactone (+)-**3i** was assigned based on detailed 2D NMR analysis following  $\gamma$ -lactone ring opening with 4-bromobenzylamine as described for amide (–)-**S20** (page S29). Absolute stereochemistry was assigned by analogy to bicyclic  $\gamma$ -lactone (+)-**3c'**.  $^1\text{H}$  NMR (500 MHz;  $\text{CDCl}_3$ ):  $\delta$  4.39 (dd,  $J = 7.9, 6.1$  Hz, 1H), 4.29-4.17 (m, 2H), 3.90 (dd,  $J = 10.9, 8.0$  Hz, 1H), 2.85 (dd,  $J = 11.5, 6.3$  Hz, 1H), 2.80-2.74 (m, 1H), 2.69 (dd,  $J = 13.6, 11.5$  Hz, 1H), 2.53 (t,  $J = 6.2$  Hz, 1H), 1.65-1.57 (m, 5H), 1.31 (t,  $J = 7.2$  Hz, 3H), 1.28-1.25 (m, 1H), 1.19-1.13 (m, 4H), 1.10 (d,  $J = 5.7$  Hz, 18H), 0.84 (t,  $J = 7.2$  Hz, 3H);  $^{13}\text{C}$  NMR (125 MHz;  $\text{CDCl}_3$ ):  $\delta$  174.6, 170.9, 148.2, 109.0, 70.6, 61.1, 44.0, 43.9, 43.6, 41.2, 32.9, 22.0, 18.2 (6), 14.8, 14.2, 13.8, 13.1 (3); IR (thin film): 2946, 2869, 1794, 1736, 1658  $\text{cm}^{-1}$ ; HRMS (ESI+)  $m/z$  calcd for  $\text{C}_{24}\text{H}_{43}\text{O}_5\text{Si}$   $[\text{M}+\text{H}]^+$ : 439.2880, found: 439.2882.

**Use of a lower catalyst loading for the DAL (5 mol%) as described for bicyclic  $\gamma$ -lactone (+)-3i:** This reaction was performed according to the procedure described above for (+)-**3i** with the exception that a lower catalyst loading (5 vs. 20 mol%), a lower “shuttle” base loading (5 vs. 20 mol%) and a longer addition time (15 vs. 5 h) were employed. Silyloxydiene alcohol **2e** (31 mg, 0.10 mmol, 1.0 equiv.), (S)-(–)-BTM (1.3 mg, 0.0050 mmol, 5 mol%), 2,6-lutidine (0.6  $\mu\text{L}$ , 0.0050 mmol, 5 mol%),  $\text{K}_3\text{PO}_4$  (64 mg, 0.30 mmol, 3.0 equiv.) in anhydrous  $\text{CH}_2\text{Cl}_2$  (0.7 mL, to make final concentration of silyloxydiene alcohol 0.1 M) and ethyl fumaroyl chloride **1a** (20  $\mu\text{L}$ , 0.15 mmol, dissolved in 0.3 mL  $\text{CH}_2\text{Cl}_2$ , 1.5 equiv.). The solution of ethyl fumaroyl chloride **1a** was added by syringe pump over 15 h and the reaction was allowed to stir for 3 h at ambient temperature (23  $^\circ\text{C}$ ). Upon completion (as judged by TLC), the reaction mixture was purified by an automated flash chromatography (5  $\rightarrow$  20% EtOAc/hexanes) to afford a single diastereomer (as judged by  $^1\text{H}$  NMR) of bicyclic  $\gamma$ -lactone (+)-**3i** (16 mg, 37% yield, 97% ee) as a clear colorless oil. Enantiomeric excess was determined by chiral

HPLC analysis in comparison with authentic racemic material using a Chiralcel AD-H column: hexanes:PrOH = 95:05, flow rate 0.5 mL/min,  $\lambda = 210$  nm:  $t_{\text{major}} = 11.4$  min,  $t_{\text{minor}} = 12.8$  min; 97% ee. All spectral data matched that reported above.

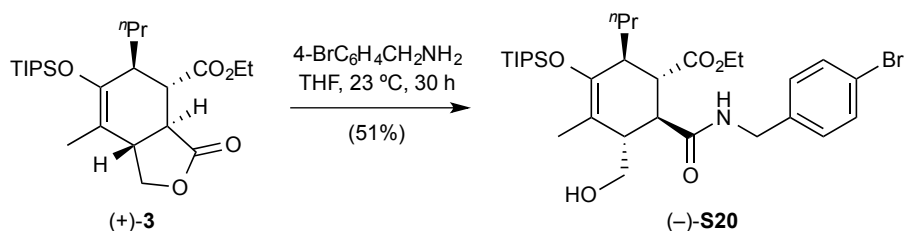

**Ethyl (1*S*,2*S*,5*S*,6*S*)-6-((4-bromobenzyl)carbamoyl)-5-(hydroxymethyl)-4-methyl-2-propyl-3-((triisopropylsilyl)oxy)cyclohex-3-ene-1-carboxylate ((-)-**S20**):** Into an oven-dried, 10-mL round-bottomed flask containing a solution of bicyclic  $\gamma$ -lactone (+)-**3i** (120 mg, 0.27 mmol, 1.0 equiv.) in THF (2.7 mL, to make final concentration of bicyclic  $\gamma$ -lactone 0.1 M), was added dropwise 4-bromobenzylamine (0.14 mL, 1.1 mmol, 4.0 equiv.). The reaction was allowed to stir at ambient temperature (23 °C) for 30 h. Upon completion (as judged by TLC), the reaction was concentrated by rotary evaporation and purified by an automated flash chromatography system (20  $\rightarrow$  50% EtOAc/hexanes) to afford amide (-)-**S20** (86 mg, 51% yield) as a pale yellow solid: m.p. 126-130 °C; TLC (EtOAc:hexanes, 1:2 v/v):  $R_f = 0.55$ ;  $[\alpha]_D^{18.1} = -14.10$  ( $c = 8.60$ ,  $\text{CHCl}_3$ ).  $^1\text{H}$  NMR (500 MHz;  $\text{CDCl}_3$ ):  $\delta$  7.42 (d,  $J = 8.4$  Hz, 2H), 7.18 (d,  $J = 8.2$  Hz, 2H), 6.70 (t,  $J = 5.8$  Hz, 1H), 4.43 (dd,  $J = 15.0, 6.1$  Hz, 1H), 4.31 (dd,  $J = 15.0, 5.6$  Hz, 1H), 4.10-4.00 (m, 2H), 3.70 (dd,  $J = 11.1, 4.6$  Hz, 1H), 3.63 (dd,  $J = 11.2, 2.5$  Hz, 1H), 3.15 (dd,  $J = 12.4, 4.5$  Hz, 1H), 2.98 (dd,  $J = 12.3, 8.6$  Hz, 1H), 2.49-2.45 (m, 2H), 1.60 (s, 3H), 1.44-1.37 (m, 2H), 1.27-1.13 (m, 8H), 1.11 (t,  $J = 6.3$  Hz, 18H), 0.81 (t,  $J = 7.2$  Hz, 3H);  $^{13}\text{C}$  NMR (125 MHz;  $\text{CDCl}_3$ ):  $\delta$  175.4, 173.7, 150.8, 137.7, 131.7 (2), 129.6 (2), 121.2, 107.3, 62.6, 60.6, 45.7, 44.9, 43.1, 42.0, 40.9, 34.2, 21.6, 18.2 (6), 14.9, 14.1, 14.0, 13.6 (3); IR (thin film): 3424, 3288, 2945, 2868, 1731, 1676, 1632, 1556  $\text{cm}^{-1}$ ; HRMS (ESI+)  $m/z$  calcd for  $\text{C}_{31}\text{H}_{51}\text{BrNO}_5\text{Si}$   $[\text{M}+\text{H}]^+$ : 624.2720, found: 624.2693.

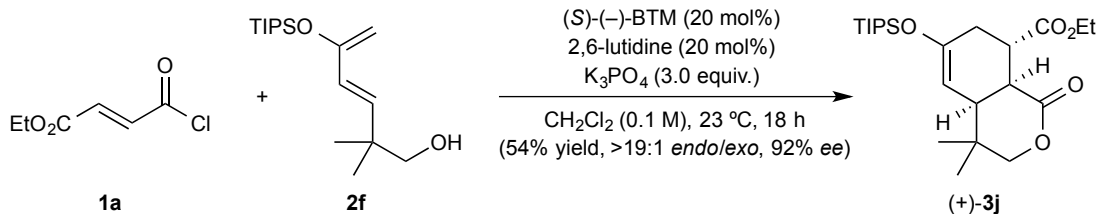

**Ethyl (4a*S*,8*S*,8a*S*)-4,4-dimethyl-1-oxo-6-((triisopropylsilyl)oxy)-3,4,4a,7,8,8a-hexa**

**hydro-1*H*-isochromene-8-carboxylate ((+)-**3j**):** Prepared according to the

representative procedure using silyloxydiene alcohol **2f** (30 mg, 0.10 mmol, 1.0 equiv.), (*S*)-(-)-BTM (5.0 mg, 0.020 mmol, 20 mol%), 2,6-lutidine (2.3  $\mu$ L, 0.020 mmol, 20 mol%),  $K_3PO_4$  (64 mg, 0.30 mmol, 3.0 equiv.) in anhydrous  $CH_2Cl_2$  (0.7 mL, to make final concentration of silyloxydiene alcohol 0.1 M) and ethyl fumaroyl chloride **1a** (20  $\mu$ L, 0.15 mmol, dissolved in 0.3 mL  $CH_2Cl_2$ , 1.5 equiv.) at ambient temperature (23  $^\circ$ C). Upon completion (as judged by TLC), the reaction mixture was purified by an automated flash chromatography (5  $\rightarrow$  20% EtOAc/hexanes) to afford a single diastereomer (as judged by  $^1H$  NMR) of bicyclic  $\delta$ -lactone (+)-**3j** (23 mg, 54% yield, 92% *ee*) as a clear colorless oil: TLC (EtOAc:hexanes, 1:9 *v/v*):  $R_f = 0.35$ ;  $[\alpha]_D^{18.6} = +21.05$  ( $c = 0.57$ ,  $CHCl_3$ ).

Enantiomeric excess was determined by chiral HPLC analysis in comparison with authentic racemic material using a Chiralcel OD-H column: hexanes:*i*PrOH = 95:05, flow rate 0.5 mL/min,  $\lambda = 210$  nm:  $t_{\text{minor}} = 10.7$  min,  $t_{\text{major}} = 12.5$  min; 92% *ee*. Absolute stereochemistry was assigned by analogy to bicyclic  $\gamma$ -lactone (+)-**3c'**.  $^1H$  NMR (500 MHz;  $CDCl_3$ ):  $\delta$  4.79-4.78 (m, 1H), 4.17-4.04 (m, 2H), 3.94 (d,  $J = 10.9$  Hz, 1H), 3.80 (dd,  $J = 10.9, 1.5$  Hz, 1H), 3.49 (dt,  $J = 4.8, 2.4$  Hz, 1H), 3.32 (dd,  $J = 7.1, 3.1$  Hz, 1H), 2.49-2.44 (m, 2H), 2.31 (ddt,  $J = 17.5, 6.2, 3.0$  Hz, 1H), 1.21 (t,  $J = 7.1$  Hz, 3H), 1.14 (s, 3H), 1.12-1.07 (m, 3H), 1.02 (d,  $J = 6.7$  Hz, 18H), 0.90 (s, 3H);  $^{13}C$  NMR (125 MHz;  $CDCl_3$ ):  $\delta$  172.9, 172.2, 152.2, 100.4, 75.8, 61.0, 40.1, 39.4, 38.4, 33.2, 27.7, 24.3, 22.6, 18.0 (6), 14.2, 12.6 (3); IR (thin film): 2945, 2868, 1730, 1661  $cm^{-1}$ ; HRMS (ESI+)  $m/z$  calcd for  $C_{23}H_{41}O_5Si$   $[M+H]^+$ : 425.2723, found: 425.2725.

**Representative procedure for the stereodivergent DAL process as described for bicyclic  $\gamma$ -lactones (–)-**3k** and (+)-**3k'**:**

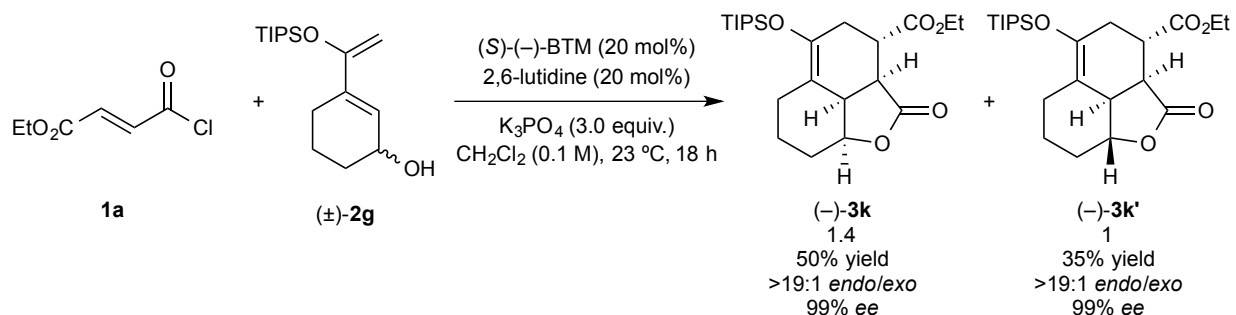

**Ethyl (2*a*S,2*a*<sup>1</sup>*R*,3*S*,8*a*S)-2-oxo-5-((triisopropylsilyl)oxy)-2*a*,2*a*<sup>1</sup>,3,4,6,7,8,8*a*-octahydro-2*H*-naphtho[1,8-*bc*]furan-3-carboxylate ((–)-**3k**) and ethyl (2*a*S,2*a*<sup>1</sup>*R*,3*S*,8*a**R*)-2-oxo-5-((triisopropylsilyl)oxy)-2*a*,2*a*<sup>1</sup>,3,4,6,7,8,8*a*-octahydro-2*H*-naphtho[1,8-*bc*]furan-3-carboxylate ((–)-**3k'**):** Prepared according to the representative procedure using silyloxydiene alcohol ( $\pm$ )-**2g** (250 mg, 0.84 mmol, 1.0 equiv.), (S)-(-)-BTM (43 mg, 0.17 mmol, 20 mol%), 2,6-lutidine (20  $\mu$ L, 0.17 mmol, 20 mol%),  $K_3PO_4$  (535 mg, 2.52 mmol, 3.0 equiv.) in anhydrous  $CH_2Cl_2$  (6.5 mL, to make final concentration of silyloxydiene alcohol 0.1 M) and ethyl fumaroyl chloride **1a** (0.17 mL, 1.26 mmol, dissolved in 1.9 mL  $CH_2Cl_2$ , 1.5 equiv.) at ambient temperature (23 °C). Upon completion (as judged by TLC), the reaction mixture was purified by an automated flash chromatography (5  $\rightarrow$  20% EtOAc/hexanes) to afford a single *endo* diastereomer (as judged by <sup>1</sup>H NMR) of bicyclic  $\gamma$ -lactone (–)-**3k** (179 mg, 50% yield, 99% ee) and a single *endo* diastereomer (as judged by <sup>1</sup>H NMR) of bicyclic  $\gamma$ -lactone (–)-**3k'** (124 mg, 35% yield, 99% ee).

(–)-**3k**: colorless solid; m.p. 58-61 °C (recrystallized from hexanes); TLC (EtOAc:hexanes, 1:9 v/v):  $R_f$  = 0.30;  $[\alpha]_D^{19.2}$  = –31.30 ( $c$  = 2.30,  $CHCl_3$ ). Enantiomeric excess was determined by chiral HPLC analysis in comparison with authentic racemic material using a Chiralcel AS-H column: hexanes:*i*PrOH = 97:03, flow rate 0.5 mL/min,  $\lambda$  = 210 nm:  $t_{major}$  = 21.1 min,  $t_{minor}$  = 28.6 min; 99% ee. Absolute stereochemistry was assigned based on X-ray analysis using anomalous dispersion (see **Figure S1**, page S38). <sup>1</sup>H NMR (500 MHz;  $CDCl_3$ ):  $\delta$  4.56 (q,  $J$  = 3.3 Hz, 1H), 4.18-4.05 (m, 2H), 3.23-

3.19 (m, 2H), 3.03-3.01 (m, 1H), 2.92-2.89 (m, 1H), 2.52-2.50 (m, 2H), 2.15-2.12 (m, 1H), 1.71-1.64 (m, 1H), 1.58-1.54 (m, 1H), 1.48-1.35 (m, 2H), 1.23 (t,  $J = 7.1$  Hz, 3H), 1.14-1.08 (m, 3H), 1.03 (d,  $J = 6.6$  Hz, 18H);  $^{13}\text{C}$  NMR (125 MHz;  $\text{CDCl}_3$ ):  $\delta$  177.6, 173.2, 142.9, 109.6, 79.5, 61.3, 43.0, 38.4, 36.6, 27.9, 27.6, 24.4, 20.7, 18.0 (6), 14.2, 13.3 (3); IR (thin film): 2944, 2867, 1778, 1733, 1677  $\text{cm}^{-1}$ ; HRMS (ESI+)  $m/z$  calcd for  $\text{C}_{23}\text{H}_{39}\text{O}_5\text{Si}$   $[\text{M}+\text{H}]^+$ : 423.2567, found: 423.2558.

(-)-**3k'**: clear colorless oil; TLC (EtOAc:hexanes, 1:9 v/v):  $R_f = 0.42$ ;  $[\alpha]_D^{19.0} = -13.33$  ( $c = 0.60$ ,  $\text{CHCl}_3$ ). Enantiomeric excess was determined by chiral HPLC analysis in comparison with authentic racemic material using a Chiralcel OD-H column: hexanes:*i*PrOH = 95:05, flow rate 0.5 mL/min,  $\lambda = 210$  nm:  $t_{\text{minor}} = 17.4$  min,  $t_{\text{major}} = 25.7$  min; 99% ee. Absolute stereochemistry was assigned by derivatization as described below.  $^1\text{H}$  NMR (500 MHz;  $\text{CDCl}_3$ ):  $\delta$  4.27-4.15 (m, 2H), 3.86 (td,  $J = 11.2, 3.4$  Hz, 1H), 2.93-2.86 (m, 2H), 2.75 (ddd,  $J = 14.0, 5.1, 1.5$  Hz, 1H), 2.56-2.50 (m, 1H), 2.47 (dd,  $J = 11.0, 6.8$  Hz, 1H), 2.26 (dq,  $J = 11.4, 3.5$  Hz, 1H), 2.18 (dd,  $J = 15.6, 3.2$  Hz, 1H), 1.98-1.93 (m, 1H), 1.74-1.69 (m, 1H), 1.65 (td,  $J = 12.0, 4.0$  Hz, 1H), 1.49-1.39 (m, 1H), 1.27 (t,  $J = 7.1$  Hz, 3H), 1.12-1.08 (m, 3H), 1.06 (d,  $J = 4.5$  Hz, 18H);  $^{13}\text{C}$  NMR (125 MHz;  $\text{CDCl}_3$ ):  $\delta$  175.7, 172.6, 140.0, 110.9, 83.9, 61.4, 47.7, 40.9, 38.8, 33.2, 30.4, 24.8, 24.5, 18.0 (6), 14.2, 13.1 (3); IR (thin film): 2945, 2868, 1787, 1737, 1697  $\text{cm}^{-1}$ ; HRMS (ESI+)  $m/z$  calcd for  $\text{C}_{23}\text{H}_{39}\text{O}_5\text{Si}$   $[\text{M}+\text{H}]^+$ : 423.2567, found: 423.2571.

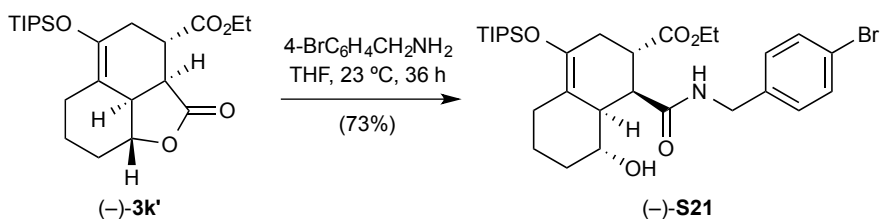

**Ethyl (1S,2S,8R,8aR)-1-((4-bromobenzyl)carbamoyl)-8-hydroxy-4-((triisopropylsilyl)oxy)-1,2,3,5,6,7,8,8a-octahydronaphthalene-2-carboxylate ((-)-S21)**: Into an oven-dried, 5-mL round-bottomed flask containing a solution of tricyclic  $\gamma$ -lactone (-)-**3k'** (57 mg, 0.14 mmol, 1.0 equiv.) in THF (1.4 mL, to make final concentration of tricyclic  $\gamma$ -lactone 0.1 M), was added dropwise 4-bromobenzylamine (68  $\mu\text{L}$ , 0.54 mmol, 4.0 equiv.). The reaction was allowed to stir at ambient temperature (23  $^\circ\text{C}$ ) for 36 h. Upon



completion (as judged by TLC), the reaction was concentrated by rotary evaporation and purified by an automated flash chromatography system (20 → 50% EtOAc/hexanes) to afford bicyclic amide (–)-**S21** (60.1 mg, 73% yield) as a white solid: m.p. 143-147 °C (recrystallized from Et<sub>2</sub>O); TLC (EtOAc:hexanes, 1:2 v/v): R<sub>f</sub> = 0.40; [α]<sub>D</sub><sup>18.5</sup> = –42.00 (c = 6.00, CHCl<sub>3</sub>). Absolute stereochemistry was assigned based on X-ray analysis using anomalous dispersion (see **Figure S2**, page S42). <sup>1</sup>H NMR (500 MHz; CDCl<sub>3</sub>): δ 7.42 (d, *J* = 8.2 Hz, 2H), 7.18 (d, *J* = 8.2 Hz, 2H), 6.44 (t, *J* = 5.7 Hz, 1H), 4.51 (dd, *J* = 15.0, 6.3 Hz, 1H), 4.23 (dd, *J* = 15.0, 5.2 Hz, 1H), 4.12 (q, *J* = 7.1 Hz, 2H), 3.67 (td, *J* = 9.9, 4.4 Hz, 1H), 3.53 (br s, 1H), 3.13 (td, *J* = 11.0, 5.7 Hz, 1H), 2.85 (d, *J* = 12.8 Hz, 1H), 2.71 (dd, *J* = 11.1, 5.4 Hz, 1H), 2.41 (dd, *J* = 16.3, 5.7 Hz, 1H), 2.34 (dd, *J* = 9.6, 5.3 Hz, 1H), 2.26-2.21 (m, 1H), 2.02-1.98 (m, 1H), 1.73-1.69 (m, 1H), 1.42-1.31 (m, 2H), 1.29-1.25 (m, 1H), 1.22 (t, *J* = 7.1 Hz, 3H), 1.12-1.08 (m, 3H), 1.05 (d, *J* = 4.3 Hz, 18H); <sup>13</sup>C NMR (125 MHz; CDCl<sub>3</sub>): δ 177.0, 174.9, 140.6, 137.2, 131.7 (2), 129.7 (2), 121.4, 115.3, 71.3, 61.0, 48.5, 45.6, 43.3, 39.4, 35.6, 33.5, 27.2, 24.9, 18.1 (6), 14.2, 13.2 (3); IR (thin film): 3286, 2942, 2867, 1732, 1714, 1680, 1644, 1557 cm<sup>-1</sup>; HRMS (ESI+) *m/z* calcd for C<sub>30</sub>H<sub>47</sub>BrNO<sub>5</sub>Si [M+H]<sup>+</sup>: 608.2407, found: 608.2386.

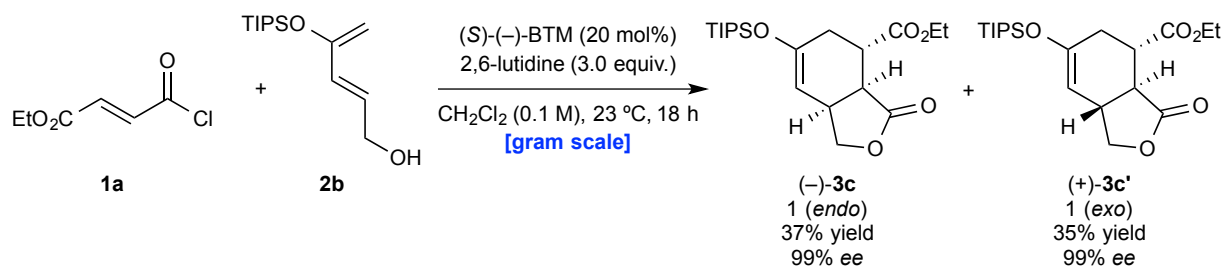

**Ethyl (3a*S*,4*S*,7a*S*)-3-oxo-6-((triisopropylsilyl)oxy)-1,3,3a,4,5,7a-hexahydroisobenzofuran-4-carboxylate ((–)-3c) and ethyl (3a*S*,4*S*,7a*R*)-3-oxo-6-((triisopropylsilyl)oxy)-1,3,3a,4,5,7a-hexahydroisobenzofuran-4-carboxylate ((+)-3c')**: To an oven-dried, 250-mL round-bottomed flask equipped with a magnetic stir bar was added silyloxydiene alcohol **2b** (2.12 g, 8.22 mmol, 1.0 equiv.), (S)-(-)-BTM (416 mg, 1.64 mmol, 20 mol%), 2,6-lutidine (2.9 mL, 24.6 mmol, 3.0 equiv.) and anhydrous CH<sub>2</sub>Cl<sub>2</sub> (70 mL, to make final concentration of silyloxydiene alcohol 0.1 M) at ambient temperature (23 °C). With vigorous stirring, ethyl fumaroyl chloride **1a** (1.31 mL, 9.86 mmol, 1.5

equiv.) in CH<sub>2</sub>Cl<sub>2</sub> (12 mL) was added over a period of 5 h by syringe pump addition. After stirring for an additional 13 h, the reaction mixture was filtered through a short pad of SiO<sub>2</sub> and the filtrate was concentrated by rotary evaporation. Purification by an automated flash chromatography (5 → 20% EtOAc/hexanes) afforded bicyclic  $\gamma$ -lactones (–)-**3c** (1.16 g, 37% yield, 99% ee) and (+)-**3c'** (1.10 g, 35% yield, 99% ee).

(–)-**3c**: All spectral data matched that reported on pages S20-S21.

(+)-**3c'**: colorless solid; m.p. 62.1-64.7 °C (recrystallized from CH<sub>2</sub>Cl<sub>2</sub>); TLC (EtOAc:hexanes, 1:4 v/v): R<sub>f</sub> = 0.58;  $[\alpha]_D^{21.8} = +66.67$  (c = 3.00, CHCl<sub>3</sub>). Enantiomeric excess was determined by chiral HPLC analysis in comparison with authentic racemic material using a Chiralcel OD-H column: hexanes:PrOH = 95:05, flow rate 0.5 mL/min,  $\lambda = 210$  nm: t<sub>minor</sub> = 22.1 min, t<sub>major</sub> = 26.1 min; 99% ee. Absolute stereochemistry was assigned based on X-ray analysis using anomalous dispersion (see **Figure S3**, page S46). <sup>1</sup>H NMR (500 MHz; CDCl<sub>3</sub>):  $\delta$  4.92 (d, J = 1.3 Hz, 1H), 4.40 (dd, J = 8.0, 6.6 Hz, 1H), 4.28-4.20 (m, 2H), 3.84 (dd, J = 11.3, 8.0 Hz, 1H), 2.93 (ddddt, J = 13.2, 11.5, 6.6, 3.3, 1.7 Hz, 1H), 2.81 (ddd, J = 11.6, 10.6, 7.1 Hz, 1H), 2.58 (dd, J = 13.3, 11.7 Hz, 1H), 2.52 (dddd, J = 17.6, 7.1, 2.0, 1.2 Hz, 1H), 2.44 (dddd, J = 17.7, 10.5, 3.3, 1.9 Hz, 1H), 1.30 (t, J = 7.1 Hz, 3H), 1.19-1.12 (m, 3H), 1.06 (d, J = 6.9 Hz, 18H); <sup>13</sup>C NMR (125 MHz; CDCl<sub>3</sub>):  $\delta$  173.9, 172.9, 152.8, 99.5, 71.5, 61.4, 45.1, 40.1, 39.5, 34.4, 18.0 (6), 14.2, 12.6 (3); IR (thin film): 2945, 2868, 1792, 1737, 1650 cm<sup>-1</sup>; HRMS (ESI+) m/z calcd for C<sub>20</sub>H<sub>34</sub>LiO<sub>5</sub>Si [M+Li]<sup>+</sup>: 389.2336, found: 389.2334.

**Use of TsCl for *in situ* activation of carboxylic acid (**1e**) for the stereodivergent DAL process as described for bicyclic  $\gamma$ -lactones (**(-)-3c** and **(+)-3c'**):**

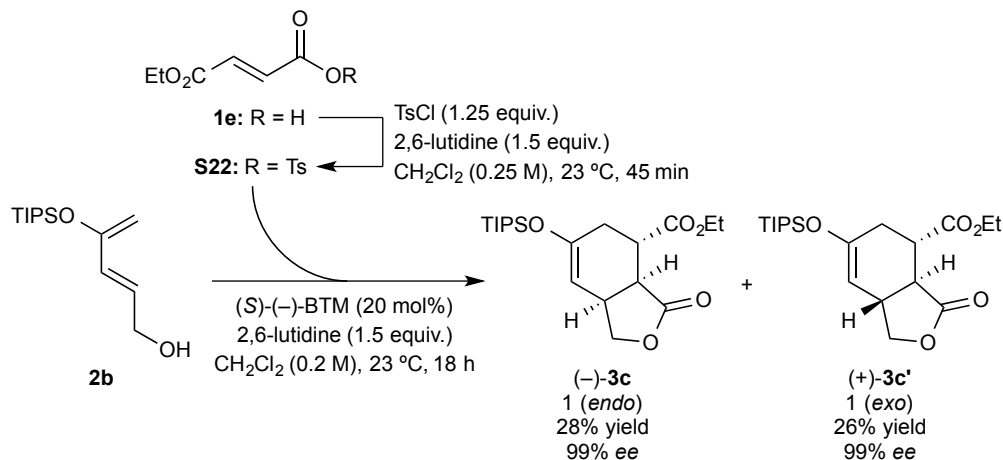

To a solution of *mono*-ethyl fumarate **1e** (18.7 mg, 0.13 mmol, 1.3 equiv.) and TsCl (23.8 mg, 0.125 mmol, 1.25 equiv.) in anhydrous CH<sub>2</sub>Cl<sub>2</sub> (0.5 mL, to make final concentration of mixed tosyl anhydride **S22** 0.25 M) was added 2,6-lutidine (18  $\mu$ L, 0.15 mmol, 1.5 equiv.). The mixture was stirred for 45 min at ambient temperature (23 °C) and then drawn into the syringe. The solution of **S22** was then transferred *via* syringe pump into a second flask containing silyloxydiene alcohol **2b** (25.6 mg, 0.10 mmol, 1.0 equiv.), (S)-(-)-BTM (5.0 mg, 0.020 mmol, 20 mol%), 2,6-lutidine (18  $\mu$ L, 0.15 mmol, 1.5 equiv) and anhydrous CH<sub>2</sub>Cl<sub>2</sub> (0.5 mL) over 5 h. The reaction was stirred for an additional 13 h at ambient temperature (23 °C), concentrated by rotary evaporation, and then directly purified by an automated flash chromatography (5  $\rightarrow$  20% EtOAc/hexanes) to afford bicyclic  $\gamma$ -lactones (**(-)-3c** (10.8 mg, 28% yield, 99% ee) and **(+)-3c'** (10.2 mg, 26% yield, 99% ee). All spectral data matched that reported above.

## Synthetic applications of bicyclic $\gamma$ -lactones (–)-**3d** and (–)-**3h**:

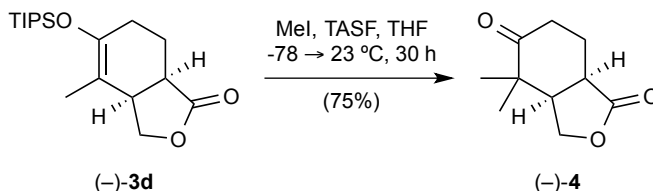

**(3a*R*,7a*R*)-4,4-dimethyltetrahydroisobenzofuran-1,5(3*H*,4*H*)-dione ((–)-**4**):** Into an oven-dried, 5-mL round-bottomed flask containing a solution of bicyclic  $\gamma$ -lactone (–)-**3d** (50 mg, 0.17 mmol, 1.0 equiv.) and MeI (0.11 mL, 1.77 mmol, 10.0 equiv.) in THF (0.20 mL, to make final concentration of bicyclic  $\gamma$ -lactone 0.9 M), was added TASF (73 mg, 0.26 mmol, 1.5 equiv.) in one portion at  $-78$  °C. The dry ice/acetone bath was removed and the mixture was allowed to warm up to ambient temperature (23 °C) on its own accord and the reaction was allowed to stir for 30 h. Upon completion (as judged by TLC), the mixture was filtered through a short pad of celite, concentrated by rotary evaporation and purified by an automated flash chromatography system (20  $\rightarrow$  50% EtOAc/hexanes) to afford  $\alpha,\alpha$ -dimethyl ketone (–)-**4** (24 mg, 75% yield) as a clear colorless oil: TLC (EtOAc:hexanes, 1:1 v/v):  $R_f = 0.31$ ;  $[\alpha]_D^{19.0} = -10.67$  ( $c = 0.75$ ,  $\text{CHCl}_3$ ).  $^1\text{H}$  NMR (500 MHz;  $\text{CDCl}_3$ ):  $\delta$  4.37 (dd,  $J = 9.7, 7.7$  Hz, 1H), 4.04 (dd,  $J = 9.7, 7.9$  Hz, 1H), 2.99 (q,  $J = 7.9$  Hz, 1H), 2.81 (q,  $J = 7.9$  Hz, 1H), 2.61-2.54 (m, 1H), 2.42-2.32 (m, 2H), 2.18-2.10 (m, 1H), 1.24 (s, 3H), 1.05 (s, 3H);  $^{13}\text{C}$  NMR (125 MHz;  $\text{CDCl}_3$ ):  $\delta$  213.1, 178.5, 68.8, 47.2, 44.9, 37.0, 35.8, 26.5, 23.4, 21.2; IR (thin film): 2971, 1771, 1710  $\text{cm}^{-1}$ ; HRMS (ESI+)  $m/z$  calcd for  $\text{C}_{10}\text{H}_{15}\text{O}_3$   $[\text{M}+\text{H}]^+$ : 183.1021, found: 183.1027.

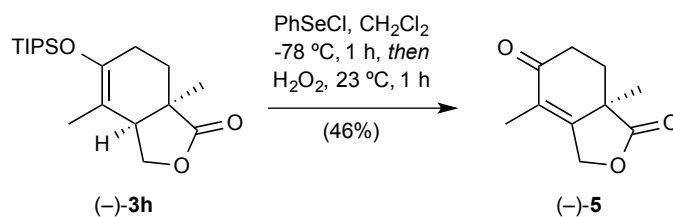

**(R)-4,7a-dimethyl-7,7a-dihydroisobenzofuran-1,5(3H,6H)-dione ((-)-5):** Into an oven-dried, 25-mL round-bottomed flask containing a solution of bicyclic  $\gamma$ -lactone (-)-**3h** (130 mg, 0.38 mmol, 1.0 equiv.) in  $\text{CH}_2\text{Cl}_2$  (4.7 mL, to make initial concentration of bicyclic  $\gamma$ -lactone 0.08 M), was added PhSeCl (88 mg, 0.46 mmol, 1.2 equiv.) in  $\text{CH}_2\text{Cl}_2$  (3.0 mL, to make final concentration of bicyclic  $\gamma$ -lactone 0.05 M) dropwise at  $-78\text{ }^\circ\text{C}$ . After stirring for 15 min,  $\text{H}_2\text{O}_2$  (35% wt. % in  $\text{H}_2\text{O}$ , 52  $\mu\text{L}$ , 3.8 mmol, 10.0 equiv.) was added dropwise. The dry ice/acetone bath was removed and the mixture was allowed to warm up to ambient temperature ( $23\text{ }^\circ\text{C}$ ) on its own accord over 45 min. Upon completion (as judged by TLC), the mixture was filtered through a short pad of celite, concentrated by rotary evaporation and purified by an automated flash chromatography system (10  $\rightarrow$  40% EtOAc/hexanes) to afford enone  $\gamma$ -lactone (-)-**5** (31 mg, 46% yield) as a white crystalline semisolid: TLC (EtOAc:hexanes, 1:2 v/v):  $R_f = 0.29$ ;  $[\alpha]_D^{18.9} = -11.11$  ( $c = 0.36$ ,  $\text{CHCl}_3$ ).  $^1\text{H NMR}$  (500 MHz;  $\text{CDCl}_3$ ):  $\delta$  4.99 (q,  $J = 1.1$  Hz, 2H), 2.66-2.53 (m, 2H), 2.22 (ddd,  $J = 13.3, 5.2, 2.2$  Hz, 1H), 2.09 (td,  $J = 13.4, 6.0$  Hz, 1H), 1.74 (t,  $J = 1.1$  Hz, 3H), 1.51 (s, 3H);  $^{13}\text{C NMR}$  (125 MHz;  $\text{CDCl}_3$ ):  $\delta$  196.7, 178.4, 154.7, 129.0, 67.4, 41.5, 32.6, 29.7, 21.4, 10.9; IR (thin film): 2924, 1778, 1668  $\text{cm}^{-1}$ ; HRMS (ESI+)  $m/z$  calcd for  $\text{C}_{10}\text{H}_{11}\text{O}_3$   $[\text{M}-\text{H}]^+$ : 179.0708, found: 179.0711.

**Single crystal X-ray structures and selected crystallographic data for compounds (–)-3k, (–)-S21 and (+)-3c' (Figures S1-S3):**

**Figure S1. Single crystal X-ray structure (ORTEP) of tricyclic  $\gamma$ -lactone (–)-3k.** The crystals were grown from a concentrated solution of tricyclic  $\gamma$ -lactone (–)-3k in hexanes (2.0 mL), using a slow evaporation method (probability ellipsoids are shown at the 50% level). X-ray crystallographic data have been deposited in the Cambridge Crystallographic Data Centre database (<http://www.ccdc.cam.ac.uk/>) under accession code CCDC 972245.

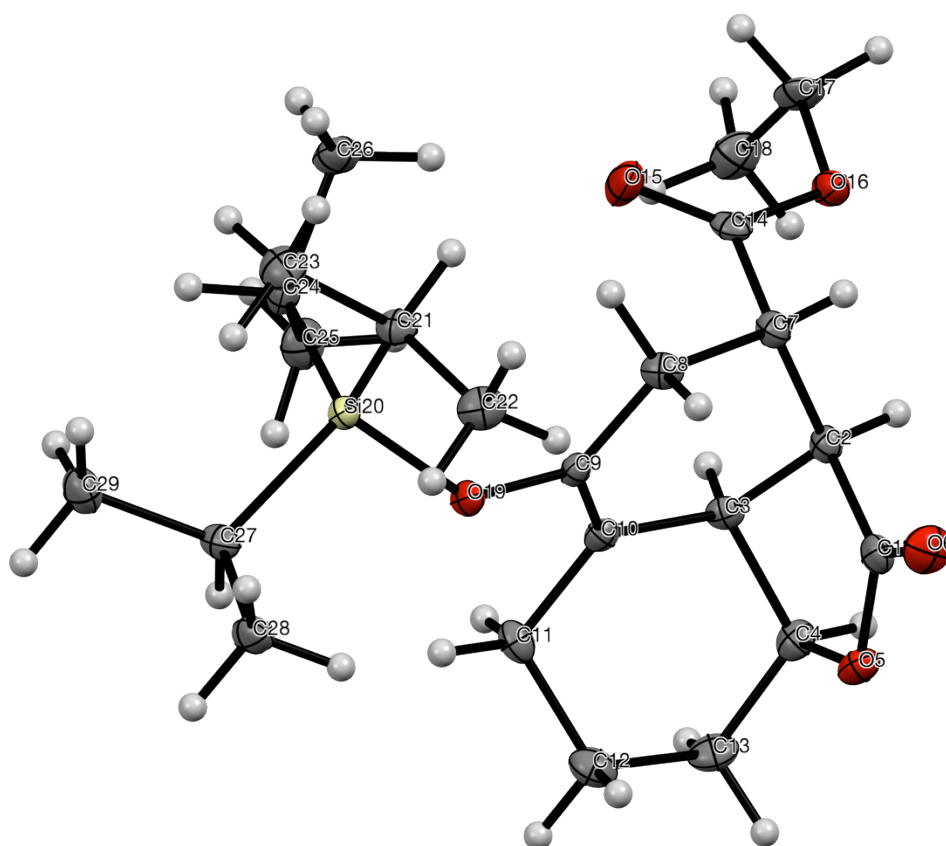

**Alert level B:**

THETM01\_ALERT\_3\_B The value of  $\sin(\theta_{\max})/\lambda$  is less than 0.575. Calculated  $\sin(\theta_{\max})/\lambda = 0.5614$ . Author Response: Data was collected on a Bruker GADDS instrument with Cu-source and MWPC (multiwire proportional counter) detector. Under these experimental conditions the maximum angle that can be collected is 120 degrees two-theta.

**Table 1. Crystal data and structure refinement for DRB\_MA\_130730\_G\_B2.**

|                                   |                                                                                              |
|-----------------------------------|----------------------------------------------------------------------------------------------|
| Identification code               | b2                                                                                           |
| Empirical formula                 | C <sub>23</sub> H <sub>38</sub> O <sub>5</sub> Si                                            |
| Formula weight                    | 422.62                                                                                       |
| Temperature                       | 110(2) K                                                                                     |
| Wavelength                        | 1.54178 Å                                                                                    |
| Crystal system                    | Orthorhombic                                                                                 |
| Space group                       | P2(1)2(1)2(1)                                                                                |
| Unit cell dimensions              | a = 8.6924(6) Å      α = 90°<br>b = 8.9976(6) Å      β = 90°<br>c = 29.0972(18) Å    γ = 90° |
| Volume                            | 2275.7(3) Å <sup>3</sup>                                                                     |
| Z                                 | 4                                                                                            |
| Density (calculated)              | 1.234 Mg/m <sup>3</sup>                                                                      |
| Absorption coefficient            | 1.157 mm <sup>-1</sup>                                                                       |
| F(000)                            | 920                                                                                          |
| Crystal size                      | 0.13 × 0.07 × 0.03 mm <sup>3</sup>                                                           |
| Theta range for data collection   | 3.04 to 59.95°                                                                               |
| Index ranges                      | -9 ≤ h ≤ 9, -9 ≤ k ≤ 10, -32 ≤ l ≤ 31                                                        |
| Reflections collected             | 18633                                                                                        |
| Independent reflections           | 3357 [R(int) = 0.0615]                                                                       |
| Completeness to theta = 59.95°    | 99.8%                                                                                        |
| Absorption correction             | Semi-empirical from equivalents                                                              |
| Max. and min. transmission        | 0.9661 and 0.8641                                                                            |
| Refinement method                 | Full-matrix least-squares on F <sup>2</sup>                                                  |
| Data / restraints / parameters    | 3357 / 0 / 269                                                                               |
| Goodness-of-fit on F <sup>2</sup> | 1.044                                                                                        |
| Final R indices [I > 2σ(I)]       | R <sub>1</sub> = 0.0299, wR <sub>2</sub> = 0.0708                                            |
| R indices (all data)              | R <sub>1</sub> = 0.0322, wR <sub>2</sub> = 0.0715                                            |
| Absolute structure parameter      | 0.00(2)                                                                                      |
| Largest diff. peak and hole       | 0.167 and -0.240 e.Å <sup>-3</sup>                                                           |

**Table 2. Atomic coordinates ( $\times 10^4$ ) and equivalent isotropic displacement parameters ( $\text{\AA}^2 \times 10^3$ ) for DRB\_MA\_130730\_G\_B2. U(eq) is defined as one third of the trace of the orthogonalized  $U^{ij}$  tensor.**

| Atom   | x        | y        | z       | U(eq) |
|--------|----------|----------|---------|-------|
| Si(20) | 4673(1)  | 4355(1)  | 5769(1) | 12(1) |
| O(16)  | 9567(2)  | -615(2)  | 6467(1) | 17(1) |
| O(19)  | 5729(1)  | 4434(2)  | 6248(1) | 14(1) |
| O(5)   | 9365(2)  | 4100(1)  | 7441(1) | 18(1) |
| O(15)  | 7446(2)  | 105(2)   | 6084(1) | 24(1) |
| O(6)   | 10899(2) | 4472(2)  | 6835(1) | 25(1) |
| C(14)  | 8607(2)  | 404(2)   | 6285(1) | 15(1) |
| C(1)   | 9985(2)  | 3702(2)  | 7033(1) | 17(1) |
| C(10)  | 6605(2)  | 3117(2)  | 6893(1) | 13(1) |
| C(7)   | 9199(2)  | 1964(2)  | 6372(1) | 14(1) |
| C(9)   | 6780(2)  | 3508(2)  | 6454(1) | 12(1) |
| C(27)  | 3109(2)  | 5732(2)  | 5901(1) | 16(1) |
| C(2)   | 9344(2)  | 2199(2)  | 6891(1) | 14(1) |
| C(22)  | 7020(3)  | 6156(2)  | 5350(1) | 21(1) |
| C(3)   | 7806(2)  | 2194(2)  | 7141(1) | 13(1) |
| C(4)   | 8292(2)  | 2929(2)  | 7595(1) | 17(1) |
| C(29)  | 1694(2)  | 5606(2)  | 5586(1) | 22(1) |
| C(8)   | 8143(2)  | 3128(2)  | 6158(1) | 15(1) |
| C(11)  | 5281(2)  | 3646(2)  | 7186(1) | 17(1) |
| C(25)  | 3485(3)  | 1700(2)  | 6151(1) | 23(1) |
| C(18)  | 7855(3)  | -2535(2) | 6774(1) | 27(1) |
| C(17)  | 9061(3)  | -2154(2) | 6424(1) | 21(1) |
| C(21)  | 5919(2)  | 4863(2)  | 5261(1) | 16(1) |
| C(12)  | 5896(2)  | 4514(2)  | 7598(1) | 22(1) |
| C(26)  | 4707(3)  | 1402(2)  | 5368(1) | 23(1) |
| C(24)  | 3803(2)  | 2455(2)  | 5686(1) | 18(1) |



|       |         |         |         |       |
|-------|---------|---------|---------|-------|
| C(28) | 3667(3) | 7343(2) | 5916(1) | 21(1) |
| C(13) | 7021(3) | 3593(2) | 7878(1) | 22(1) |
| C(23) | 4979(3) | 5129(3) | 4820(1) | 24(1) |

---

**Figure S2. Single crystal X-ray structure (ORTEP) of bicyclic amide (–)-S21.** The crystals were grown from a concentrated solution of bicyclic amide (–)-S21 in Et<sub>2</sub>O (2.0 mL), using a slow evaporation method (probability ellipsoids are shown at the 50% level). X-ray crystallographic data have been deposited in the Cambridge Crystallographic Data Centre database (<http://www.ccdc.cam.ac.uk/>) under accession code CCDC 972248.

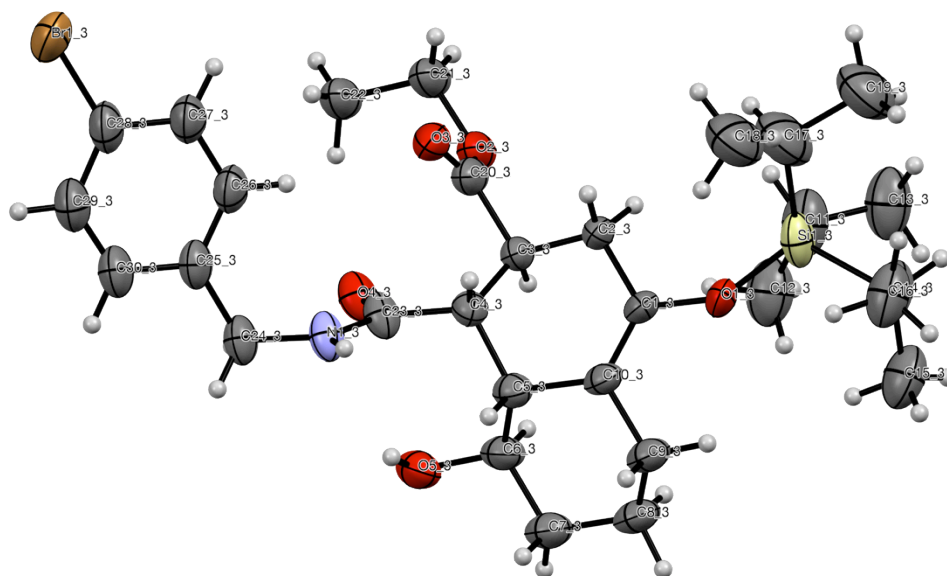

**Alert level B:**

Crystal system given = triclinic. PLAT019\_ALERT\_1\_B Check \_diffrn\_measured\_fraction\_theta\_full/\_max = 0.927. Author Response: Physical limitations of the GADDS X-ray diffractometer and triclinic system.

PLAT220\_ALERT\_2\_B Large Non-Solvent C Ueq(max)/Ueq(min) ... 4.4 Ratio. Author Response: Possible disorder in the terminal groups. The disorder was not modeled.

PLAT242\_ALERT\_2\_B Low Ueq as Compared to Neighbors for ... Si1\_4 Check. Author Response: Possible disorder in the Si terminal groups. The disorder was not modeled.

PLAT341\_ALERT\_3\_B Low Bond Precision on C-C Bonds ... 0.0194 Ang. Author Response: Diffuse scattering due to disorder lowers the precision of the C-C bond length determination.

**Table 1. Crystal data and structure refinement for DR89.**

|                                   |                                                                                                                      |
|-----------------------------------|----------------------------------------------------------------------------------------------------------------------|
| Identification code               | dr89                                                                                                                 |
| Empirical formula                 | C <sub>30</sub> H <sub>46</sub> Br N O <sub>5</sub> Si                                                               |
| Formula weight                    | 608.68                                                                                                               |
| Temperature                       | 110(2) K                                                                                                             |
| Crystal system                    | Triclinic                                                                                                            |
| Space group                       | P1                                                                                                                   |
| Unit cell dimensions              | a = 13.4034(9) Å      α = 89.539(5)°<br>b = 13.4037(9) Å      β = 89.620(5)°<br>c = 17.8225(13) Å     γ = 87.393(5)° |
| Volume                            | 3198.4(4) Å <sup>3</sup>                                                                                             |
| Z                                 | 4                                                                                                                    |
| Density (calculated)              | 1.264 Mg/m <sup>3</sup>                                                                                              |
| Absorption coefficient            | 2.400 mm <sup>-1</sup>                                                                                               |
| F(000)                            | 1288.0                                                                                                               |
| Crystal size                      | 0.11 × 0.1 × 0.01 mm <sup>3</sup>                                                                                    |
| Radiation                         | CuK α (λ = 1.54178)                                                                                                  |
| Theta range for data collection   | 4.958 to 128.74°                                                                                                     |
| Index ranges                      | -15 ≤ h ≤ 15, -15 ≤ k ≤ 15, -20 ≤ l ≤ 20                                                                             |
| Reflections collected             | 55755                                                                                                                |
| Independent reflections           | 18937 [R(int) = 0.0831]                                                                                              |
| Data / restraints / parameters    | 18937 / 2631 / 1372                                                                                                  |
| Goodness-of-fit on F <sup>2</sup> | 1.089                                                                                                                |
| Final R indices [I > 2σ(I)]       | R <sub>1</sub> = 0.0896, wR <sub>2</sub> = 0.2171                                                                    |
| R indices (all data)              | R <sub>1</sub> = 0.1063, wR <sub>2</sub> = 0.2373                                                                    |
| Largest diff. peak and hole       | 0.84 and -0.73 e.Å <sup>-3</sup>                                                                                     |

**Table 2. Fractional atomic coordinates ( $\times 10^4$ ) and equivalent isotropic displacement parameters ( $\text{\AA}^2 \times 10^3$ ) for DR89.  $U(\text{eq})$  is defined as one third of the trace of the orthogonalized  $U^{ij}$  tensor.**

| Atom  | x         | y         | z           | U(eq)    |
|-------|-----------|-----------|-------------|----------|
| Br1_3 | 10682(3)  | 15286(3)  | 10137.5(16) | 81.8(9)  |
| Si1_3 | 9768(4)   | 14978(4)  | 2986(3)     | 56.5(14) |
| O1_3  | 9221(7)   | 14314(6)  | 3624(4)     | 43(2)    |
| O2_3  | 8532(9)   | 17264(7)  | 5792(6)     | 56(2)    |
| O3_3  | 9470(9)   | 16079(9)  | 6369(7)     | 56(3)    |
| O4_3  | 7289(8)   | 15692(8)  | 6721(6)     | 52(3)    |
| O5_3  | 6011(8)   | 14206(10) | 5963(6)     | 54(3)    |
| N1_3  | 7793(10)  | 14158(8)  | 7106(5)     | 47(2)    |
| C1_3  | 8766(10)  | 14473(9)  | 4301(6)     | 38(2)    |
| C2_3  | 9095(10)  | 15341(10) | 4752(6)     | 40(2)    |
| C3_3  | 8383(9)   | 15607(8)  | 5397(6)     | 40(2)    |
| C4_3  | 8190(8)   | 14644(8)  | 5820(5)     | 39(2)    |
| C5_3  | 7630(7)   | 13926(8)  | 5334(6)     | 42(2)    |
| C6_3  | 6489(7)   | 14178(10) | 5245(7)     | 49(2)    |
| C7_3  | 6045(9)   | 13404(12) | 4750(8)     | 55(3)    |
| C8_3  | 6539(9)   | 13318(12) | 4003(8)     | 53(3)    |
| C9_3  | 7673(9)   | 13055(10) | 4074(7)     | 48(3)    |
| C10_3 | 8092(8)   | 13839(8)  | 4559(6)     | 40(2)    |
| C11_3 | 9086(12)  | 16206(10) | 2802(8)     | 86(5)    |
| C12_3 | 7970(13)  | 16218(17) | 2957(14)    | 88(5)    |
| C13_3 | 9268(18)  | 16626(16) | 2046(11)    | 90(5)    |
| C14_3 | 9813(13)  | 14210(11) | 2111(7)     | 75(4)    |
| C15_3 | 8822(14)  | 13897(16) | 1847(12)    | 82(5)    |
| C16_3 | 10498(16) | 13237(14) | 2269(11)    | 76(5)    |
| C17_3 | 11044(10) | 15212(12) | 3317(9)     | 101(5)   |
| C18_3 | 11520(14) | 14410(20) | 3861(14)    | 99(6)    |

|       |           |           |          |        |
|-------|-----------|-----------|----------|--------|
| C19_3 | 11774(13) | 15440(20) | 2663(13) | 106(6) |
| C20_3 | 8853(10)  | 16338(9)  | 5910(7)  | 52(2)  |
| C21_3 | 8929(13)  | 18013(11) | 6287(9)  | 62(3)  |
| C22_3 | 8415(16)  | 17993(17) | 7043(9)  | 66(4)  |
| C23_3 | 7695(10)  | 14872(8)  | 6569(6)  | 45(2)  |
| C24_3 | 7414(9)   | 14304(12) | 7852(6)  | 49(3)  |
| C25_3 | 8225(10)  | 14564(13) | 8400(6)  | 51(3)  |
| C26_3 | 9024(11)  | 15094(13) | 8193(7)  | 55(3)  |
| C27_3 | 9749(12)  | 15362(14) | 8706(6)  | 57(3)  |
| C28_3 | 9645(11)  | 15075(15) | 9459(7)  | 60(3)  |
| C29_3 | 8875(12)  | 14467(16) | 9660(7)  | 64(3)  |
| C30_3 | 8190(11)  | 14213(14) | 9146(7)  | 59(3)  |

---

**Figure S3. Single crystal X-ray structure (ORTEP) of bicyclic  $\gamma$ -lactone (+)-**3c'**.** The crystals were grown from a concentrated solution of bicyclic  $\gamma$ -lactone (+)-**3c'** in CH<sub>2</sub>Cl<sub>2</sub> (2.0 mL), using a slow evaporation method (probability ellipsoids are shown at the 50% level). X-ray crystallographic data have been deposited in the Cambridge Crystallographic Data Centre database (<http://www.ccdc.cam.ac.uk/>) under accession code CCDC 972247.

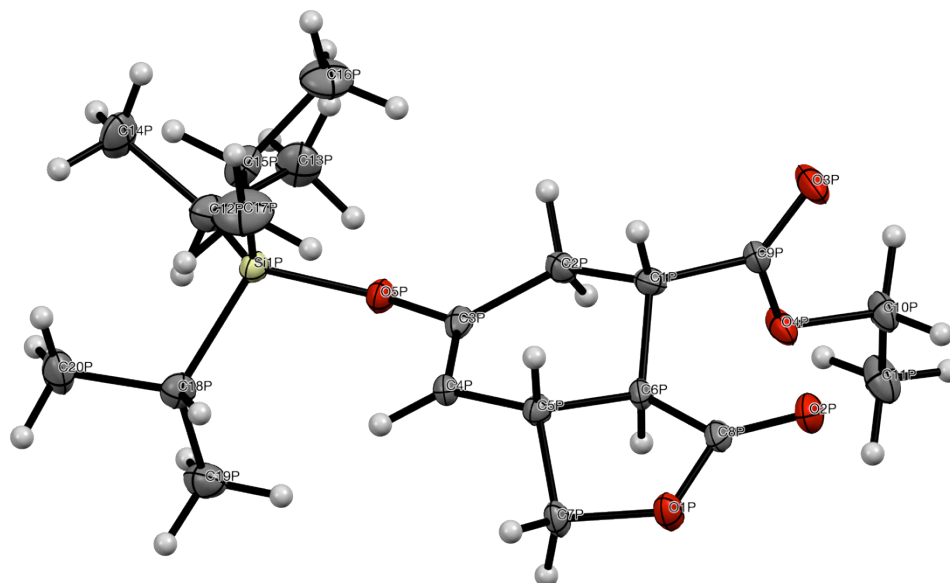

**Alert level B:**

THETM01\_ALERT\_3\_B The value of  $\sin(\theta_{\max})/\lambda$  is less than 0.575. Calculated  $\sin(\theta_{\max})/\lambda = 0.5617$ . Author Response: Data was collected on a Bruker GADDS instrument with Cu-source and MWPC (multiwire proportional counter) detector. Under these experimental conditions the maximum angle that can be collected is 120 degrees two-theta.

**Table 1. Crystal data and structure refinement for DRB\_MA\_130306\_G\_904F2.**

|                     |                                                   |
|---------------------|---------------------------------------------------|
| Identification code | drb                                               |
| Empirical formula   | C <sub>20</sub> H <sub>34</sub> O <sub>5</sub> Si |
| Formula weight      | 382.56                                            |
| Temperature         | 110(2) K                                          |
| Wavelength          | 1.54178 Å                                         |
| Crystal system      | Monoclinic                                        |

|                                                 |                                                                                                                             |
|-------------------------------------------------|-----------------------------------------------------------------------------------------------------------------------------|
| Space group                                     | P2(1)                                                                                                                       |
| Unit cell dimensions                            | a = 16.6474(7) Å $\alpha = 90^\circ$<br>b = 34.4793(14) Å $\beta = 95.850(2)^\circ$<br>c = 19.1312(8) Å $\gamma = 90^\circ$ |
| Volume                                          | 10923.9(8) Å <sup>3</sup>                                                                                                   |
| Z                                               | 20                                                                                                                          |
| Density (calculated)                            | 1.163 Mg/m <sup>3</sup>                                                                                                     |
| Absorption coefficient                          | 1.155 mm <sup>-1</sup>                                                                                                      |
| F(000)                                          | 4160                                                                                                                        |
| Crystal size                                    | 0.28 × 0.06 × 0.05 mm <sup>3</sup>                                                                                          |
| Theta range for data collection                 | 2.32 to 60.00°                                                                                                              |
| Index ranges                                    | -18 ≤ h ≤ 18, -37 ≤ k ≤ 35, -21 ≤ l ≤ 21                                                                                    |
| Reflections collected                           | 225412                                                                                                                      |
| Independent reflections                         | 31523 [R(int) = 0.0593]                                                                                                     |
| Completeness to theta = 60.00°                  | 99.3%                                                                                                                       |
| Absorption correction                           | Semi-empirical from equivalents                                                                                             |
| Max. and min. transmission                      | 0.9445 and 0.7380                                                                                                           |
| Refinement method                               | Full-matrix least-squares on F <sup>2</sup>                                                                                 |
| Data / restraints / parameters                  | 31523 / 1 / 2412                                                                                                            |
| Goodness-of-fit on F <sup>2</sup>               | 1.069                                                                                                                       |
| Final R indices [I > 2σ(I)]                     | R <sub>1</sub> = 0.0551, wR <sub>2</sub> = 0.1469                                                                           |
| R indices (all data)                            | R <sub>1</sub> = 0.0610, wR <sub>2</sub> = 0.1564                                                                           |
| Absolute structure (Hooft / Flack)<br>parameter | -0.006(7) / 0.013(14)                                                                                                       |
| Extinction coefficient                          | 0.00031(2)                                                                                                                  |
| Largest diff. peak and hole                     | 0.720 and -0.591 e.Å <sup>-3</sup>                                                                                          |

**Table 2. Atomic coordinates ( $\times 10^4$ ) and equivalent isotropic displacement parameters ( $\text{\AA}^2 \times 10^3$ ) for DRB\_MA\_130306\_G\_904F2. U(eq) is defined as one third of the trace of the orthogonalized  $U^{ij}$  tensor.**

| Atom   | x       | y       | z        | U(eq) |
|--------|---------|---------|----------|-------|
| Si(1P) | 6042(1) | 7578(1) | 6596(1)  | 16(1) |
| O(1P)  | 7243(1) | 7429(1) | 10228(1) | 22(1) |
| O(2P)  | 8590(1) | 7377(1) | 10271(1) | 25(1) |
| O(3P)  | 9775(1) | 7420(1) | 8850(1)  | 31(1) |
| O(4P)  | 9083(1) | 6861(1) | 8811(1)  | 23(1) |
| O(5P)  | 6727(1) | 7326(1) | 7110(1)  | 18(1) |
| C(1P)  | 8323(2) | 7436(1) | 8634(2)  | 17(1) |
| C(2P)  | 7926(2) | 7322(1) | 7896(2)  | 19(1) |
| C(3P)  | 7020(2) | 7388(1) | 7795(2)  | 16(1) |
| C(4P)  | 6558(2) | 7482(1) | 8303(2)  | 15(1) |
| C(5P)  | 6959(2) | 7552(1) | 9028(2)  | 16(1) |
| C(6P)  | 7734(2) | 7319(1) | 9152(2)  | 16(1) |
| C(7P)  | 6557(2) | 7434(1) | 9677(2)  | 19(1) |
| C(8P)  | 7942(2) | 7376(1) | 9925(2)  | 17(1) |
| C(9P)  | 9146(2) | 7246(1) | 8778(2)  | 17(1) |
| C(10P) | 9836(2) | 6646(1) | 8958(2)  | 22(1) |
| C(11P) | 9644(2) | 6225(1) | 8786(2)  | 29(1) |
| C(12P) | 6146(2) | 7366(1) | 5698(2)  | 24(1) |
| C(13P) | 6983(2) | 7195(1) | 5615(2)  | 33(1) |
| C(14P) | 5908(2) | 7651(1) | 5103(2)  | 33(1) |
| C(15P) | 6291(2) | 8109(1) | 6643(2)  | 25(1) |
| C(16P) | 7199(2) | 8182(1) | 6627(2)  | 36(1) |
| C(17P) | 5966(2) | 8328(1) | 7261(2)  | 43(1) |
| C(18P) | 4999(2) | 7481(1) | 6854(2)  | 20(1) |
| C(19P) | 4865(2) | 7044(1) | 6963(2)  | 28(1) |
| C(20P) | 4340(2) | 7644(1) | 6315(2)  | 30(1) |



## Computational data

**General methods:** All calculations were performed using Gaussian09.<sup>8,9</sup> Conformational analyses on reactants and transition state structures were performed using the Spartan10 software suite.<sup>10</sup> Geometries were optimized at the uM06-2X/6-31G(d)<sup>11,12</sup> level using “guess=(mix,always)” keywords to assure that diradical processes were not missed. The identities of all minima and transition state structures were verified by frequency analysis. Implicit solvent effects of dichloromethane were modeled using the SMD continuum model.<sup>13</sup> Products of the reaction were located by decreasing and constraining the length of the shorter forming bond to ~1.55 Å in the transition state structure and optimizing the complex to a minimum, which resulted in the formation of the second bond, and therefore, the cyclohexene ring. NBO6.0<sup>14</sup> was used with the keywords “E2PERT=0.1” and “STERIC=0.1” for the natural bond orbital analysis of sulfur•••lone pair interactions. Structural drawings were produced using CYLView.<sup>15</sup>

**Conformational search:** The conformational searches of reactants and transition state structures for the Diels-Alder reactions were done using Spartan10. Conformer distribution at the ground state using Molecular Mechanics (MMFF) and keywords “searchmethod=systematic” and “maxenergy=50” were used.

## Calculated coordinates and energies

### Silyloxydiene alcohol (2c):

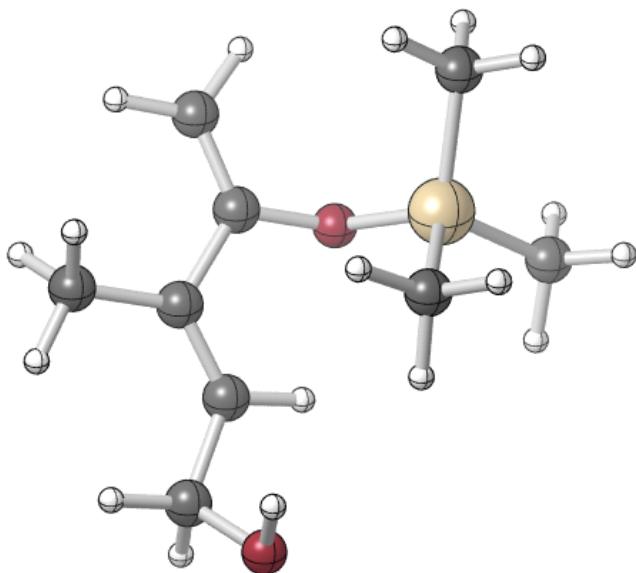

Charge = 0 Multiplicity = 1

mem = 20GB, nproc = 16

Link 0: opt m062x/6-31g(d) freq=noraman scrf=(smd,solvent=dichloromethane)

Job cpu time: 0 days 5 hours 6 minutes 28.9 seconds.

File lengths (MBytes): RWF= 180 Int= 0 D2E= 0 Chk= 8 Scr= 1

Normal termination of Gaussian 09 at Tue Oct 15 02:33:37 2013.

| Item                 | Value    | Threshold | Converged? |
|----------------------|----------|-----------|------------|
| Maximum Force        | 0.000023 | 0.000450  | YES        |
| RMS Force            | 0.000005 | 0.000300  | YES        |
| Maximum Displacement | 0.001517 | 0.001800  | YES        |
| RMS Displacement     | 0.000412 | 0.001200  | YES        |

Predicted change in Energy = -1.292192D-08

Optimization completed.

-- Stationary point found.

Link 1: N Geom=AllCheck Guess=TCheck SCRF=Check GenChk RM062X/6-31G(d) Freq

Job cpu time: 0 days 0 hours 45 minutes 35.1 seconds.

File lengths (MBytes): RWF= 264 Int= 0 D2E= 0 Chk= 13 Scr= 1

Normal termination of Gaussian 09 at Tue Oct 15 02:36:32 2013.

| Item                 | Value    | Threshold | Converged? |
|----------------------|----------|-----------|------------|
| Maximum Force        | 0.000023 | 0.000450  | YES        |
| RMS Force            | 0.000005 | 0.000300  | YES        |
| Maximum Displacement | 0.002559 | 0.001800  | NO         |
| RMS Displacement     | 0.000680 | 0.001200  | YES        |

Predicted change in Energy = -2.142063D-08

Values come from Link 1:

HF = -793.4977666 hartrees (-497927.783519166 kcal/mol)

Imaginary Frequencies: none found

Zero-point correction = 0.255956 (Hartree/Particle)

Temperature 298.150 Kelvin. Pressure 1.00000 Atm.

Sum of electronic and thermal Free Energies =

-793.286374 hartrees (-497795.13254874 kcal/mol)

Comments:

Coordinates (from last standard orientation):

```
-----  
Center      Atomic      Coordinates (Angstroms)  
Number      Number      X          Y          Z  
-----  
  1          6          -1.789481 -0.288014 -0.572437  
  2          6           0.380319  2.656051 -0.177700  
  3          6          -3.090830 -0.997507 -0.350989  
  4          6          -0.048458  1.411338 -0.423352
```

|    |    |           |           |           |
|----|----|-----------|-----------|-----------|
| 5  | 6  | 0.791570  | -1.302206 | 1.391004  |
| 6  | 6  | 3.117543  | 0.624855  | 0.841751  |
| 7  | 6  | 2.564231  | -1.710651 | -1.107445 |
| 8  | 6  | -1.445877 | 0.955064  | -0.200382 |
| 9  | 6  | -2.378693 | 1.946485  | 0.443736  |
| 10 | 1  | -1.034051 | -0.907485 | -1.051103 |
| 11 | 1  | 1.413073  | 2.925175  | -0.374643 |
| 12 | 1  | -0.283560 | 3.425212  | 0.196776  |
| 13 | 1  | -3.831018 | -0.372046 | 0.161086  |
| 14 | 1  | -3.524191 | -1.299905 | -1.310550 |
| 15 | 1  | 0.046637  | -1.982972 | 0.964440  |
| 16 | 1  | 1.448027  | -1.888470 | 2.045693  |
| 17 | 1  | 0.266990  | -0.572411 | 2.018642  |
| 18 | 1  | 3.697007  | 1.161466  | 0.082416  |
| 19 | 1  | 2.678684  | 1.363738  | 1.521178  |
| 20 | 1  | 3.816673  | 0.014203  | 1.425967  |
| 21 | 1  | 3.238273  | -2.390030 | -0.573475 |
| 22 | 1  | 1.786506  | -2.316488 | -1.585546 |
| 23 | 1  | 3.140843  | -1.217469 | -1.897471 |
| 24 | 1  | -2.480754 | -1.965170 | 1.218249  |
| 25 | 1  | -1.969850 | 2.302424  | 1.395567  |
| 26 | 1  | -2.512158 | 2.823853  | -0.199200 |
| 27 | 1  | -3.365079 | 1.520991  | 0.631188  |
| 28 | 8  | 0.810376  | 0.473233  | -0.934987 |
| 29 | 8  | -2.871154 | -2.210857 | 0.364149  |
| 30 | 14 | 1.810874  | -0.464008 | 0.059455  |

---

### Ethyl fumaroyl chloride (1a):

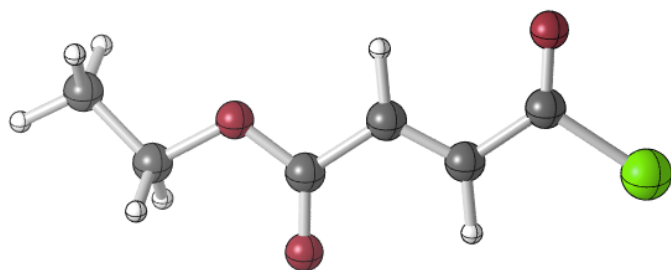

Charge = 0 Multiplicity = 1

mem = 20GB

Link 0: opt freq=noraman m062x/6-31g(d) scrf=(smd,solvent=dichloromethane)

Job cpu time: 0 days 0 hours 41 minutes 50.0 seconds.

File lengths (MBytes): RWF= 61 Int= 0 D2E= 0 Chk= 5 Scr= 1

Normal termination of Gaussian 09 at Tue Oct 15 10:51:54 2013.

| Item                 | Value    | Threshold | Converged? |
|----------------------|----------|-----------|------------|
| Maximum Force        | 0.000017 | 0.000450  | YES        |
| RMS Force            | 0.000004 | 0.000300  | YES        |
| Maximum Displacement | 0.000879 | 0.001800  | YES        |
| RMS Displacement     | 0.000217 | 0.001200  | YES        |

Predicted change in Energy = -4.982950D-09

Optimization completed.

-- Stationary point found.

Link 1: N Geom=AllCheck Guess=TChek SCRF=Check GenChk RM062X/6-31G(d) Freq

Job cpu time: 0 days 0 hours 13 minutes 39.0 seconds.

File lengths (MBytes): RWF= 112 Int= 0 D2E= 0 Chk= 8 Scr= 1

Normal termination of Gaussian 09 at Tue Oct 15 10:52:46 2013.

| Item          | Value    | Threshold | Converged? |
|---------------|----------|-----------|------------|
| Maximum Force | 0.000017 | 0.000450  | YES        |
| RMS Force     | 0.000004 | 0.000300  | YES        |

Maximum Displacement 0.001760 0.001800 YES  
RMS Displacement 0.000477 0.001200 YES

Predicted change in Energy = -9.981294D-09

Optimization completed.

-- Stationary point found.

Values come from Link 1:

HF = -918.5039922 hartrees (-576370.440145422 kcal/mol)

Imaginary Frequencies: none found

Zero-point correction = 0.126267 (Hartree/Particle)

Temperature 298.150 Kelvin. Pressure 1.00000 Atm.

Sum of electronic and thermal Free Energies =

-918.416338 hartrees (-576315.43625838 kcal/mol)

Comments:

Coordinates (from last standard orientation):

---

| Center | Atomic | Coordinates (Angstroms) |           |           |
|--------|--------|-------------------------|-----------|-----------|
| Number | Number | X                       | Y         | Z         |
| 1      | 6      | -2.404785               | 0.535097  | -0.020979 |
| 2      | 6      | 0.008958                | 0.346013  | -0.031898 |
| 3      | 6      | -1.169862               | -0.277188 | -0.025157 |
| 4      | 6      | 1.268965                | -0.453229 | -0.032192 |
| 5      | 6      | 3.616705                | -0.317867 | -0.008249 |
| 6      | 6      | 4.675205                | 0.755901  | 0.080148  |
| 7      | 1      | 0.088461                | 1.428999  | -0.034584 |
| 8      | 1      | -1.250380               | -1.358672 | -0.017684 |
| 9      | 1      | 3.699592                | -0.904604 | -0.927911 |

---

|    |    |           |           |           |
|----|----|-----------|-----------|-----------|
| 10 | 1  | 3.655164  | -1.005150 | 0.841606  |
| 11 | 1  | 4.570953  | 1.326879  | 1.006880  |
| 12 | 1  | 5.665622  | 0.292605  | 0.068215  |
| 13 | 1  | 4.604344  | 1.443500  | -0.767095 |
| 14 | 8  | -2.491100 | 1.719758  | -0.059931 |
| 15 | 8  | 2.334266  | 0.343047  | -0.005009 |
| 16 | 8  | 1.311464  | -1.661878 | -0.054280 |
| 17 | 17 | -3.896583 | -0.468432 | 0.059665  |

---

**(S)-(-)-BTM catalyst:**

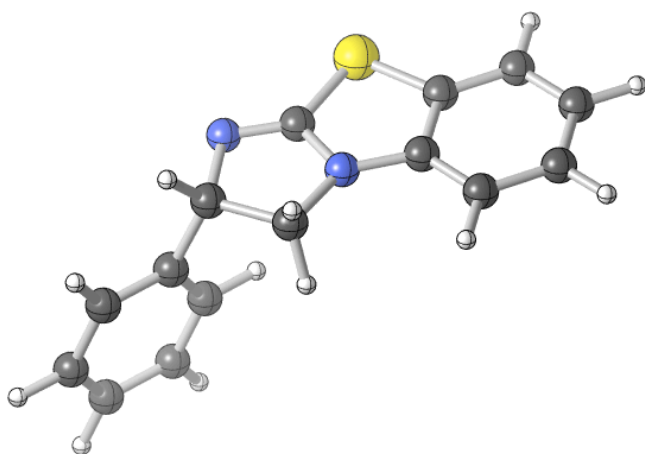

Charge = 0 Multiplicity = 1

mem = 57GB

Link 0: opt freq=norman M062X/6-31g(d) scrf=(smd,solvent=dichloromethane)

Job cpu time: 0 days 3 hours 11 minutes 45.7 seconds.

File lengths (MBytes): RWF= 237 Int= 0 D2E= 0 Chk= 11 Scr= 1

Normal termination of Gaussian 09 at Tue Oct 15 04:29:26 2013.

| Item                 | Value    | Threshold | Converged? |
|----------------------|----------|-----------|------------|
| Maximum Force        | 0.000187 | 0.000450  | YES        |
| RMS Force            | 0.000033 | 0.000300  | YES        |
| Maximum Displacement | 0.000258 | 0.001800  | YES        |
| RMS Displacement     | 0.000054 | 0.001200  | YES        |

Predicted change in Energy = -1.391136D-08

Optimization completed.

-- Stationary point found.

Link 1: N Geom=AllCheck Guess=TCheck SCRF=Check GenChk RM062X/6-31G(d) Freq

Job cpu time: 0 days 1 hours 22 minutes 44.0 seconds.

File lengths (MBytes): RWF= 424 Int= 0 D2E= 0 Chk= 16 Scr= 1



Normal termination of Gaussian 09 at Tue Oct 15 04:38:05 2013.

| Item                 | Value    | Threshold | Converged? |
|----------------------|----------|-----------|------------|
| Maximum Force        | 0.000187 | 0.000450  | YES        |
| RMS Force            | 0.000033 | 0.000300  | YES        |
| Maximum Displacement | 0.153336 | 0.001800  | NO         |
| RMS Displacement     | 0.032624 | 0.001200  | NO         |

Predicted change in Energy = -1.867818D-05

Values come from Link 1:

HF = -1086.2208184 hartrees (-681614.425754184 kcal/mol)

Imaginary Frequencies: 1 (-14.6567 1/cm)

Zero-point correction = 0.238538 (Hartree/Particle)

Temperature 298.150 Kelvin. Pressure 1.00000 Atm.

Sum of electronic and thermal Free Energies =

-1086.022849 hartrees (-681490.19797599 kcal/mol)

Comments:

Coordinates (from last standard orientation):

```
-----  
Center      Atomic      Coordinates (Angstroms)  
Number      Number      X          Y          Z  
-----  
  1         6         -2.622757 -1.835345 -0.226202  
  2         6         -2.051143 -0.567243 -0.191749  
  3         6         -2.800831  0.543358  0.240477  
  4         6         -4.119368  0.401802  0.639518  
  5         6         -4.694017 -0.871669  0.604275  
  6         6         -3.951076 -1.971754  0.177476  
  7         1         -2.040013 -2.689223 -0.557279
```

|    |    |           |           |           |
|----|----|-----------|-----------|-----------|
| 8  | 1  | -4.695008 | 1.261072  | 0.970043  |
| 9  | 1  | -5.726304 | -0.999322 | 0.913007  |
| 10 | 1  | -4.410423 | -2.955214 | 0.155941  |
| 11 | 6  | -0.453291 | 1.125987  | -0.427716 |
| 12 | 16 | -1.834591 | 2.037413  | 0.195902  |
| 13 | 7  | -0.767979 | -0.208171 | -0.537803 |
| 14 | 6  | 0.374198  | -0.911640 | -1.099338 |
| 15 | 1  | 0.711082  | -1.709620 | -0.431290 |
| 16 | 1  | 0.126795  | -1.338116 | -2.075938 |
| 17 | 6  | 1.417213  | 0.264382  | -1.204627 |
| 18 | 7  | 0.716092  | 1.500830  | -0.770152 |
| 19 | 6  | 2.655307  | 0.014957  | -0.368832 |
| 20 | 6  | 3.880315  | -0.258566 | -0.975907 |
| 21 | 6  | 2.574811  | 0.025786  | 1.027006  |
| 22 | 6  | 5.011046  | -0.524068 | -0.203338 |
| 23 | 1  | 3.949754  | -0.262956 | -2.061207 |
| 24 | 6  | 3.700723  | -0.238619 | 1.800282  |
| 25 | 1  | 1.624399  | 0.245994  | 1.508614  |
| 26 | 6  | 4.922813  | -0.515315 | 1.185873  |
| 27 | 1  | 5.959686  | -0.733435 | -0.689213 |
| 28 | 1  | 3.627323  | -0.226295 | 2.883940  |
| 29 | 1  | 5.802044  | -0.721590 | 1.789173  |
| 30 | 1  | 1.723671  | 0.389164  | -2.247721 |

---

### Chloride anion (Cl<sup>-</sup>):

Charge = -1 Multiplicity = 1

mem = 57GB, nproc = 16

Link 0: opt freq=noraman M062X/6-31g(d) scrf=(smd,solvent=dichloromethane)

Job cpu time: 0 days 0 hours 0 minutes 48.6 seconds.

File lengths (MBytes): RWF= 9 Int= 0 D2E= 0 Chk= 1 Scr= 1

Normal termination of Gaussian 09 at Tue Oct 15 04:19:55 2013.

| Item                 | Value    | Threshold | Converged? |
|----------------------|----------|-----------|------------|
| Maximum Force        | 0.000000 | 0.000450  | YES        |
| RMS Force            | 0.000000 | 0.000300  | YES        |
| Maximum Displacement | 0.000000 | 0.001800  | YES        |
| RMS Displacement     | 0.000000 | 0.001200  | YES        |

Predicted change in Energy = 0.000000D+00

Optimization completed.

-- Stationary point found.

Link 1: N Geom=AllCheck Guess=TCheck SCRF=Check GenChk RM062X/6-31G(d) Freq

Job cpu time: 0 days 0 hours 1 minutes 17.4 seconds.

File lengths (MBytes): RWF= 9 Int= 0 D2E= 0 Chk= 2 Scr= 1

Normal termination of Gaussian 09 at Tue Oct 15 04:20:00 2013.

| Item                 | Value    | Threshold | Converged? |
|----------------------|----------|-----------|------------|
| Maximum Force        | 0.000000 | 0.000450  | YES        |
| RMS Force            | 0.000000 | 0.000300  | YES        |
| Maximum Displacement | 0.000000 | 0.001800  | YES        |
| RMS Displacement     | 0.000000 | 0.001200  | YES        |

Predicted change in Energy = 0.000000D+00

Optimization completed.

-- Stationary point found.

Values come from Link 1:

HF = -460.31703 hartrees (-288853.5394953 kcal/mol)

Imaginary Frequencies: none found

Zero-point correction = 0.000000 (Hartree/Particle)

Temperature 298.150 Kelvin. Pressure 1.00000 Atm.

Sum of electronic and thermal Free Energies =

-460.332053 hartrees (-288862.96657803 kcal/mol)

Comments:

Coordinates (from last standard orientation):

atom 1 is isolated, type=Cl

---

| Center | Atomic | Coordinates (Angstroms) |          |          |
|--------|--------|-------------------------|----------|----------|
| Number | Number | X                       | Y        | Z        |
| 1      | 17     | 0.000000                | 0.000000 | 0.000000 |

---

**Acylammonium cation (lowest energy conformer; 0° dihedral angle):**

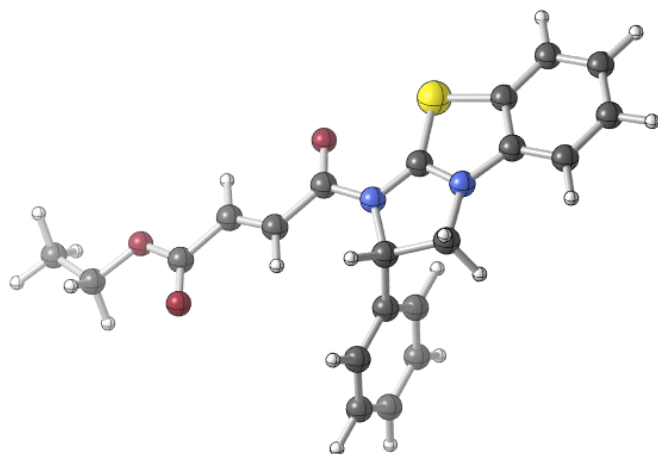

Charge = 1 Multiplicity = 1

mem = 20GB, nproc = 16

Link 0: opt m062x/6-31g(d) freq=noraman scrf=(smd,solvent=dichloromethane)

Job cpu time: 0 days 8 hours 45 minutes 18.1 seconds.

File lengths (MBytes): RWF= 520 Int= 0 D2E= 0 Chk= 20 Scr= 1

Normal termination of Gaussian 09 at Tue Oct 15 03:57:42 2013.

| Item                 | Value    | Threshold | Converged? |
|----------------------|----------|-----------|------------|
| Maximum Force        | 0.000021 | 0.000450  | YES        |
| RMS Force            | 0.000003 | 0.000300  | YES        |
| Maximum Displacement | 0.001572 | 0.001800  | YES        |
| RMS Displacement     | 0.000344 | 0.001200  | YES        |

Predicted change in Energy = -8.895401D-09

Optimization completed.

-- Stationary point found.

Link 1: N Geom=AllCheck Guess=TCheck SCRF=Check GenChk RM062X/6-31G(d) Freq

Job cpu time: 0 days 3 hours 54 minutes 45.1 seconds.

File lengths (MBytes): RWF= 1305 Int= 0 D2E= 0 Chk= 27 Scr= 1

Normal termination of Gaussian 09 at Tue Oct 15 04:12:33 2013.

| Item                 | Value    | Threshold | Converged? |
|----------------------|----------|-----------|------------|
| Maximum Force        | 0.000021 | 0.000450  | YES        |
| RMS Force            | 0.000003 | 0.000300  | YES        |
| Maximum Displacement | 0.002485 | 0.001800  | NO         |
| RMS Displacement     | 0.000557 | 0.001200  | YES        |

Predicted change in Energy = -1.499555D-08

Values come from Link 1:

HF = -1544.4297238 hartrees (-969145.095981738 kcal/mol)

Imaginary Frequencies: none found

Zero-point correction = 0.369165 (Hartree/Particle)

Temperature 298.150 Kelvin. Pressure 1.00000 Atm.

Sum of electronic and thermal Free Energies =

-1544.116364 hartrees (-968948.45957364 kcal/mol)

Comments:

Coordinates (from last standard orientation):

```
-----  
Center      Atomic      Coordinates (Angstroms)  
Number      Number      X          Y          Z  
-----  
  1         6         5.118716  0.557519 -0.672996  
  2         6         3.974890 -0.164938 -0.347371  
  3         6         4.040338 -1.399776  0.309957  
  4         6         5.267544 -1.951514  0.663092  
  5         6         6.413808 -1.233568  0.341594  
  6         6         6.339917  0.001845 -0.316444  
  7         6         1.761554 -0.694356 -0.172008
```

|    |   |           |           |           |
|----|---|-----------|-----------|-----------|
| 8  | 6 | 2.022552  | 1.329876  | -1.262766 |
| 9  | 6 | 0.498065  | 1.049299  | -1.064955 |
| 10 | 6 | -0.190536 | 2.083743  | -0.205172 |
| 11 | 6 | -1.070458 | 2.989354  | -0.797295 |
| 12 | 6 | 0.079524  | 2.167238  | 1.162976  |
| 13 | 6 | -1.678312 | 3.977323  | -0.025250 |
| 14 | 6 | -0.532674 | 3.151049  | 1.932707  |
| 15 | 6 | -1.411009 | 4.057704  | 1.338928  |
| 16 | 6 | -0.592561 | -1.111837 | -0.066609 |
| 17 | 6 | -1.932593 | -0.601409 | -0.422289 |
| 18 | 6 | -3.012540 | -1.280471 | -0.035926 |
| 19 | 6 | -4.367303 | -0.762183 | -0.384195 |
| 20 | 6 | -6.676979 | -1.141952 | -0.167468 |
| 21 | 6 | -7.590487 | -2.172525 | 0.452224  |
| 22 | 1 | 5.045797  | 1.512466  | -1.182892 |
| 23 | 1 | 5.328840  | -2.907601 | 1.172213  |
| 24 | 1 | 7.383695  | -1.640446 | 0.607450  |
| 25 | 1 | 7.253691  | 0.536706  | -0.552594 |
| 26 | 1 | 2.332151  | 2.255339  | -0.774399 |
| 27 | 1 | 2.311331  | 1.339976  | -2.314685 |
| 28 | 1 | -1.281692 | 2.918143  | -1.861515 |
| 29 | 1 | 0.766426  | 1.464302  | 1.630031  |
| 30 | 1 | -2.365469 | 4.678106  | -0.489042 |
| 31 | 1 | -0.324464 | 3.210434  | 2.996500  |
| 32 | 1 | -1.889008 | 4.824148  | 1.941246  |
| 33 | 1 | 0.002605  | 0.968826  | -2.034460 |
| 34 | 1 | -2.032994 | 0.319274  | -0.987940 |
| 35 | 1 | -6.823075 | -0.148272 | 0.265787  |
| 36 | 1 | -6.812969 | -1.067522 | -1.250148 |
| 37 | 1 | -7.427071 | -2.237296 | 1.531413  |
| 38 | 1 | -8.631574 | -1.888294 | 0.275606  |

|    |    |           |           |           |
|----|----|-----------|-----------|-----------|
| 39 | 1  | -7.421666 | -3.158099 | 0.009803  |
| 40 | 1  | -2.941252 | -2.200389 | 0.536454  |
| 41 | 8  | -0.376005 | -2.165968 | 0.498049  |
| 42 | 8  | -4.567629 | 0.250598  | -1.015778 |
| 43 | 8  | -5.319754 | -1.557245 | 0.094370  |
| 44 | 7  | 2.650206  | 0.183925  | -0.595405 |
| 45 | 7  | 0.496113  | -0.306196 | -0.426096 |
| 46 | 16 | 2.427552  | -2.077844 | 0.590884  |

---



**Acylammonium cation (100° dihedral angle):**

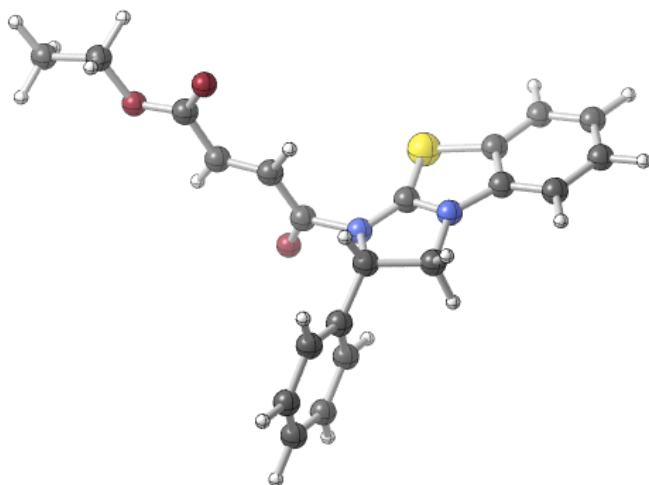

Charge = 1 Multiplicity = 1

mem = 7200MB

Link 0: hf/3-21g----

1/38=1/1;2/12=2,17=6,18=5,40=1/2;3/5=5,11=9,16=1,25=1,30=1/1,2,3;4//1;5/5=2,38=5/  
2;6/7=2,8=2,9=2,10=2,28=1/1;99/5=1,9=1/99; ----Title---- Symbolic Z-matrix: Charge = 1  
Multiplicity = 1C 4.68387 -1.02853 -1.14043 C 3.48635 -1.10242 -0.44016 C  
3.20572 -2.17348 0.41637 C 4.1149 -3.20842 0.5902 C 5.31573 -3.13727 -  
0.10966 C 5.59525 -2.06295 -0.96014 C 1.40876 -0.51036 0.34146 C 2.23597  
1.14936 -1.01566 C 0.72875 1.40484 -0.73246 C 0.39431 2.82034 -0.34686 C -  
0.19471 3.66347 -1.28804 C 0.7094 3.3015 0.92609 C -0.45418 4.99255 -0.96364  
C 0.43921 4.62615 1.24953 C -0.13714 5.4727 0.30347 C -0.8748 0.25319  
0.95912 C -1.82593 -0.46144 0.09061 C -3.0958 -0.62703 0.4694 C -4.02944 -  
1.36631 -0.44119 C -6.22214 -2.15958 -0.70462 C -7.51836 -2.14883 0.07185 H  
4.89632 -0.19448 -1.80105 H 3.90056 -4.04062 1.25198 H 6.0462 -3.92923  
0.01137 H 6.54013 -2.03316 -1.49139 H 2.87009 1.85234 -0.46538 H 2.46964  
1.18447 -2.08032 H -0.45135 3.28444 -2.27446 H 1.13928 2.63517 1.66973 H -  
0.90991 5.64837 -1.69797 H 0.67332 4.99716 2.24182 H -0.34689 6.5064  
0.55834 H 0.13404 1.09906 -1.60376 H -1.48811 -0.85776 -0.86391 H -6.30526

-1.65167 -1.6695 H -5.84909 -3.1714 -0.88664 H -7.85689 -1.12473 0.24603 H  
-8.28972 -2.6767 -0.49409 H -7.39536 -2.64606 1.03684 H -3.47016 -0.24388  
1.41451 O -1.08408 0.71018 2.04303 O -3.69182 -1.81102 -1.5113 O -5.23998  
-1.45614 0.09073 N 2.41718 -0.20357 -0.47446 N 0.46614 0.42363 0.36678 S  
1.61517 -1.99421 1.18878 Input orientation:

Job cpu time: 0 days 0 hours 3 minutes 35.1 seconds.

File lengths (MBytes): RWF= 34 Int= 0 D2E= 0 Chk= 4 Scr= 1

Normal termination of Gaussian 09 at Sat Oct 19 15:40:13 2013.

No convergence data found for this link.

HF = -1528.7887896 hartrees (-959330.253361896 kcal/mol)

Comments:

Coordinates (from last standard orientation):

---

| Center<br>Number | Atomic<br>Number | Coordinates (Angstroms) |           |           |
|------------------|------------------|-------------------------|-----------|-----------|
|                  |                  | X                       | Y         | Z         |
| 1                | 6                | 4.683870                | -1.028527 | -1.140428 |
| 2                | 6                | 3.486347                | -1.102417 | -0.440158 |
| 3                | 6                | 3.205715                | -2.173478 | 0.416368  |
| 4                | 6                | 4.114901                | -3.208424 | 0.590200  |
| 5                | 6                | 5.315733                | -3.137265 | -0.109656 |
| 6                | 6                | 5.595253                | -2.062954 | -0.960140 |
| 7                | 6                | 1.408756                | -0.510359 | 0.341463  |
| 8                | 6                | 2.235973                | 1.149365  | -1.015656 |
| 9                | 6                | 0.728747                | 1.404843  | -0.732458 |
| 10               | 6                | 0.394306                | 2.820342  | -0.346864 |
| 11               | 6                | -0.194714               | 3.663466  | -1.288038 |
| 12               | 6                | 0.709395                | 3.301504  | 0.926090  |

|    |   |           |           |           |
|----|---|-----------|-----------|-----------|
| 13 | 6 | -0.454183 | 4.992547  | -0.963642 |
| 14 | 6 | 0.439210  | 4.626151  | 1.249534  |
| 15 | 6 | -0.137144 | 5.472698  | 0.303471  |
| 16 | 6 | -0.874796 | 0.253194  | 0.959116  |
| 17 | 6 | -1.825932 | -0.461444 | 0.090605  |
| 18 | 6 | -3.095799 | -0.627027 | 0.469395  |
| 19 | 6 | -4.029444 | -1.366307 | -0.441192 |
| 20 | 6 | -6.222142 | -2.159582 | -0.704620 |
| 21 | 6 | -7.518363 | -2.148826 | 0.071854  |
| 22 | 1 | 4.896322  | -0.194480 | -1.801048 |
| 23 | 1 | 3.900556  | -4.040620 | 1.251979  |
| 24 | 1 | 6.046202  | -3.929230 | 0.011373  |
| 25 | 1 | 6.540132  | -2.033157 | -1.491387 |
| 26 | 1 | 2.870090  | 1.852336  | -0.465383 |
| 27 | 1 | 2.469642  | 1.184474  | -2.080320 |
| 28 | 1 | -0.451354 | 3.284443  | -2.274461 |
| 29 | 1 | 1.139276  | 2.635165  | 1.669727  |
| 30 | 1 | -0.909907 | 5.648372  | -1.697966 |
| 31 | 1 | 0.673323  | 4.997155  | 2.241825  |
| 32 | 1 | -0.346887 | 6.506401  | 0.558343  |
| 33 | 1 | 0.134043  | 1.099058  | -1.603764 |
| 34 | 1 | -1.488110 | -0.857755 | -0.863906 |
| 35 | 1 | -6.305257 | -1.651667 | -1.669500 |
| 36 | 1 | -5.849090 | -3.171403 | -0.886637 |
| 37 | 1 | -7.856890 | -1.124734 | 0.246033  |
| 38 | 1 | -8.289716 | -2.676704 | -0.494090 |
| 39 | 1 | -7.395361 | -2.646063 | 1.036843  |
| 40 | 1 | -3.470162 | -0.243875 | 1.414510  |
| 41 | 8 | -1.084077 | 0.710177  | 2.043027  |
| 42 | 8 | -3.691822 | -1.811020 | -1.511300 |
| 43 | 8 | -5.239975 | -1.456138 | 0.090729  |

|    |    |          |           |           |
|----|----|----------|-----------|-----------|
| 44 | 7  | 2.417182 | -0.203570 | -0.474464 |
| 45 | 7  | 0.466143 | 0.423629  | 0.366781  |
| 46 | 16 | 1.615171 | -1.994206 | 1.188782  |

---

**Acylammonium cation (180° dihedral angle):**

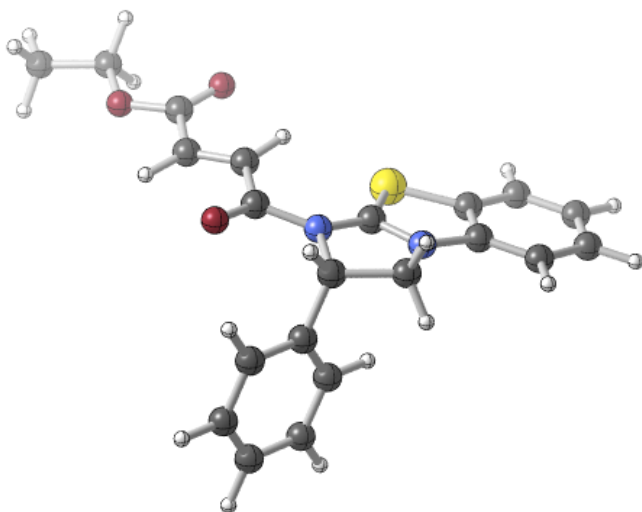

Charge = 1 Multiplicity = 1

mem = 7200MB

Link 0: hf/3-21g----

1/38=1/1;2/12=2,17=6,18=5,40=1/2;3/5=5,11=9,16=1,25=1,30=1/1,2,3;4//1;5/5=2,38=5/  
2;6/7=2,8=2,9=2,10=2,28=1/1;99/5=1,9=1/99; ----Title---- Symbolic Z-matrix: Charge =  
1 Multiplicity = 1C 4.40731 -1.86212 -0.32001 C 3.03795 -1.63608 -0.22928 C  
2.17441 -2.57984 0.33649 C 2.65595 -3.78718 0.82947 C 4.02447 -4.0165  
0.74182 C 4.88574 -3.06844 0.1754 C 1.01243 -0.56811 -0.46456 C 2.73258  
0.72169 -1.33116 C 1.44182 1.57948 -1.24317 C 1.49475 2.67397 -0.20418 C  
1.05071 3.95479 -0.52526 C 1.97616 2.40605 1.08041 C 1.10163 4.96827  
0.42804 C 2.01916 3.41648 2.03363 C 1.58509 4.70004 1.70508 C -0.97372  
0.89064 -1.02705 C -1.9642 -0.14033 -0.66123 C -3.22578 0.20727 -0.40839 C  
-4.2 -0.87272 -0.04893 C -6.44061 -1.3395 0.47173 C -7.73239 -0.57521 0.64641  
H 5.07125 -1.12661 -0.76203 H 1.98945 -4.52313 1.26592 H 4.4292 -4.94875  
1.11959 H 5.94812 -3.27864 0.12023 H 3.5625 1.18938 -0.79806 H 3.02802  
0.49178 -2.35833 H 0.65209 4.15297 -1.51619 H 2.31922 1.40654 1.34694 H  
0.75971 5.96562 0.17238 H 2.39375 3.206 3.02999 H 1.6244 5.49029 2.44781 H

1.16572 1.99055 -2.21524 H -1.70431 -1.19412 -0.62277 H -6.4969 -2.08058 -  
0.33059 H -6.12965 -1.8537 1.38547 H -8.00652 -0.06207 -0.27832 H -8.53566  
-1.26779 0.90941 H -7.63865 0.16584 1.44369 H -3.56516 1.23789 -0.4538 O -  
1.23585 1.98654 -1.45165 O -3.88654 -2.03401 0.06282 O -5.41727 -0.37901  
0.12562 N 2.32694 -0.51608 -0.65636 N 0.40346 0.55325 -0.88418 S 0.49732 -  
2.01536 0.31698 Input orientation:

Job cpu time: 0 days 0 hours 3 minutes 34.7 seconds.

File lengths (MBytes): RWF= 34 Int= 0 D2E= 0 Chk= 4 Scr= 1

Normal termination of Gaussian 09 at Sat Oct 19 15:41:39 2013.

No convergence data found for this link.

HF = -1528.8026458 hartrees (-959338.948265958 kcal/mol)

Comments:

Coordinates (from last standard orientation):

| -----  |        |                         |           |           |
|--------|--------|-------------------------|-----------|-----------|
| Center | Atomic | Coordinates (Angstroms) |           |           |
| Number | Number | X                       | Y         | Z         |
| -----  |        |                         |           |           |
| 1      | 6      | 4.407314                | -1.862115 | -0.320008 |
| 2      | 6      | 3.037947                | -1.636082 | -0.229284 |
| 3      | 6      | 2.174414                | -2.579839 | 0.336494  |
| 4      | 6      | 2.655947                | -3.787180 | 0.829474  |
| 5      | 6      | 4.024465                | -4.016496 | 0.741823  |
| 6      | 6      | 4.885737                | -3.068440 | 0.175398  |
| 7      | 6      | 1.012431                | -0.568109 | -0.464564 |
| 8      | 6      | 2.732576                | 0.721685  | -1.331155 |
| 9      | 6      | 1.441819                | 1.579483  | -1.243168 |
| 10     | 6      | 1.494753                | 2.673973  | -0.204180 |
| 11     | 6      | 1.050713                | 3.954788  | -0.525257 |

|    |   |           |           |           |
|----|---|-----------|-----------|-----------|
| 12 | 6 | 1.976159  | 2.406049  | 1.080414  |
| 13 | 6 | 1.101634  | 4.968269  | 0.428037  |
| 14 | 6 | 2.019163  | 3.416483  | 2.033629  |
| 15 | 6 | 1.585092  | 4.700042  | 1.705075  |
| 16 | 6 | -0.973717 | 0.890644  | -1.027046 |
| 17 | 6 | -1.964201 | -0.140327 | -0.661228 |
| 18 | 6 | -3.225775 | 0.207273  | -0.408391 |
| 19 | 6 | -4.199995 | -0.872717 | -0.048931 |
| 20 | 6 | -6.440613 | -1.339497 | 0.471730  |
| 21 | 6 | -7.732394 | -0.575213 | 0.646406  |
| 22 | 1 | 5.071248  | -1.126605 | -0.762031 |
| 23 | 1 | 1.989449  | -4.523132 | 1.265923  |
| 24 | 1 | 4.429197  | -4.948754 | 1.119594  |
| 25 | 1 | 5.948115  | -3.278640 | 0.120230  |
| 26 | 1 | 3.562502  | 1.189380  | -0.798055 |
| 27 | 1 | 3.028023  | 0.491778  | -2.358334 |
| 28 | 1 | 0.652091  | 4.152972  | -1.516186 |
| 29 | 1 | 2.319223  | 1.406543  | 1.346944  |
| 30 | 1 | 0.759709  | 5.965616  | 0.172376  |
| 31 | 1 | 2.393746  | 3.205996  | 3.029990  |
| 32 | 1 | 1.624402  | 5.490285  | 2.447809  |
| 33 | 1 | 1.165717  | 1.990545  | -2.215238 |
| 34 | 1 | -1.704308 | -1.194121 | -0.622771 |
| 35 | 1 | -6.496904 | -2.080580 | -0.330593 |
| 36 | 1 | -6.129647 | -1.853699 | 1.385467  |
| 37 | 1 | -8.006522 | -0.062068 | -0.278318 |
| 38 | 1 | -8.535655 | -1.267789 | 0.909411  |
| 39 | 1 | -7.638654 | 0.165836  | 1.443692  |
| 40 | 1 | -3.565157 | 1.237891  | -0.453799 |
| 41 | 8 | -1.235846 | 1.986537  | -1.451646 |
| 42 | 8 | -3.886536 | -2.034008 | 0.062824  |

|    |    |           |           |           |
|----|----|-----------|-----------|-----------|
| 43 | 8  | -5.417274 | -0.379010 | 0.125617  |
| 44 | 7  | 2.326941  | -0.516083 | -0.656362 |
| 45 | 7  | 0.403463  | 0.553248  | -0.884179 |
| 46 | 16 | 0.497315  | -2.015363 | 0.316982  |

---



**EndoBottom TSS (background reaction; leads to *endo* cycloadduct):**

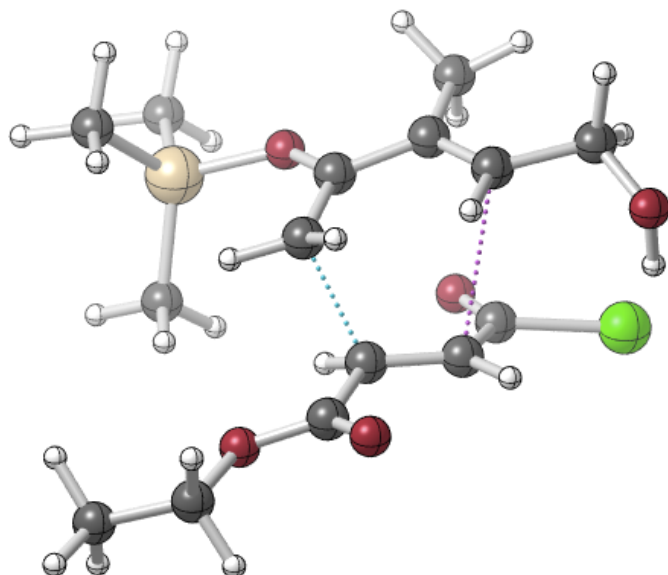

Charge = 0 Multiplicity = 1

mem = 50GB

Dipole moment (field-independent basis, Debye):

X = 8.9322 Y = -2.1207 Z = 2.4065 Tot = 9.4907

Link 0: opt=(calcfc,ts,noeigen) freq=noraman M062X/6-31g(d) scrf=(smd,solvent=dichloromethane)

Job cpu time: 3 days 3 hours 32 minutes 31.3 seconds.

File lengths (MBytes): RWF= 1059 Int= 0 D2E= 0 Chk= 23 Scr= 1

Normal termination of Gaussian 09 at Mon Oct 7 00:33:02 2013.

| Item                 | Value    | Threshold | Converged? |
|----------------------|----------|-----------|------------|
| Maximum Force        | 0.000006 | 0.000450  | YES        |
| RMS Force            | 0.000001 | 0.000300  | YES        |
| Maximum Displacement | 0.000534 | 0.001800  | YES        |
| RMS Displacement     | 0.000113 | 0.001200  | YES        |

Predicted change in Energy = -2.287133D-09

Optimization completed.

-- Stationary point found.

Link 1: N Geom=AllCheck Guess=TCHECK SCRF=Check GenChk RM062X/6-31G(d) Freq

Job cpu time: 0 days 3 hours 12 minutes 22.4 seconds.

File lengths (MBytes): RWF= 1059 Int= 0 D2E= 0 Chk= 32 Scr= 1

Normal termination of Gaussian 09 at Mon Oct 7 00:45:20 2013.

| Item                 | Value    | Threshold | Converged? |
|----------------------|----------|-----------|------------|
| Maximum Force        | 0.000006 | 0.000450  | YES        |
| RMS Force            | 0.000001 | 0.000300  | YES        |
| Maximum Displacement | 0.001144 | 0.001800  | YES        |
| RMS Displacement     | 0.000221 | 0.001200  | YES        |

Predicted change in Energy = -5.719982D-09

Optimization completed.

-- Stationary point found.

Values come from Link 1:

HF = -1712.0012625 hartrees (-1074297.91223137 kcal/mol)

Imaginary Frequencies: 1 (-372.8605 1/cm)

Zero-point correction = 0.384682 (Hartree/Particle)

Temperature 298.150 Kelvin. Pressure 1.00000 Atm.

Sum of electronic and thermal Free Energies =

-1711.674450 hartrees (-1074092.8341195 kcal/mol)

Comments:

Coordinates (from last standard orientation):

---

| Center<br>Number | Atomic<br>Number | Coordinates (Angstroms) |           |           |
|------------------|------------------|-------------------------|-----------|-----------|
|                  |                  | X                       | Y         | Z         |
| 1                | 6                | -1.914100               | 0.344829  | -1.433254 |
| 2                | 6                | 0.046593                | 1.302003  | -0.460606 |
| 3                | 6                | -1.331866               | 1.361819  | -0.628438 |
| 4                | 6                | -2.189280               | -0.344562 | 1.450524  |
| 5                | 6                | 0.634395                | 0.099066  | 1.154345  |
| 6                | 6                | -1.386174               | -1.357780 | 1.035562  |
| 7                | 6                | 0.031202                | -1.120049 | 0.865302  |
| 8                | 6                | -3.687251               | -0.402118 | 1.565667  |
| 9                | 6                | 3.360566                | -2.242173 | 1.413405  |
| 10               | 6                | 2.831588                | -0.956549 | -1.371656 |
| 11               | 6                | 2.377968                | -3.968023 | -0.947818 |
| 12               | 6                | -1.919889               | -2.687187 | 0.571733  |
| 13               | 6                | 0.720289                | 2.512040  | 0.103794  |
| 14               | 6                | 2.777643                | 3.638632  | 0.323082  |
| 15               | 6                | 4.212645                | 3.443299  | -0.106903 |
| 16               | 17               | -3.743829               | 0.622910  | -1.718302 |
| 17               | 1                | 0.629688                | 0.725079  | -1.171581 |
| 18               | 1                | -1.932426               | 2.149006  | -0.192521 |
| 19               | 1                | -1.766065               | 0.580838  | 1.829170  |
| 20               | 1                | 1.713063                | 0.186708  | 1.064870  |
| 21               | 1                | 0.188806                | 0.732276  | 1.911995  |
| 22               | 1                | -4.126670               | -1.015832 | 0.768883  |
| 23               | 1                | -3.957468               | -0.872346 | 2.520586  |
| 24               | 1                | 3.004105                | -2.992704 | 2.127586  |

|    |    |           |           |           |
|----|----|-----------|-----------|-----------|
| 25 | 1  | 4.405161  | -2.477523 | 1.177381  |
| 26 | 1  | 3.343806  | -1.267574 | 1.911074  |
| 27 | 1  | 2.876467  | 0.048179  | -0.937297 |
| 28 | 1  | 3.828785  | -1.188156 | -1.766572 |
| 29 | 1  | 2.140898  | -0.934438 | -2.222385 |
| 30 | 1  | 3.400867  | -4.239108 | -1.232538 |
| 31 | 1  | 2.004853  | -4.736710 | -0.262566 |
| 32 | 1  | 1.760714  | -3.991169 | -1.852267 |
| 33 | 1  | -4.203119 | 1.237721  | 0.680188  |
| 34 | 1  | -2.950055 | -2.844694 | 0.894870  |
| 35 | 1  | -1.879694 | -2.747454 | -0.522066 |
| 36 | 1  | -1.310348 | -3.505124 | 0.965576  |
| 37 | 1  | 2.670827  | 3.643315  | 1.411747  |
| 38 | 1  | 2.355238  | 4.569287  | -0.066327 |
| 39 | 1  | 4.292920  | 3.433703  | -1.197476 |
| 40 | 1  | 4.825220  | 4.263172  | 0.278323  |
| 41 | 1  | 4.610025  | 2.501611  | 0.282997  |
| 42 | 8  | -1.420823 | -0.618465 | -1.945900 |
| 43 | 8  | 0.686102  | -2.113036 | 0.261101  |
| 44 | 8  | -4.255428 | 0.892370  | 1.586119  |
| 45 | 8  | 2.019337  | 2.533044  | -0.206800 |
| 46 | 8  | 0.168457  | 3.356069  | 0.772133  |
| 47 | 14 | 2.339455  | -2.284776 | -0.152298 |

---

**ExoTop TSS (background reaction; leads to exo cycloadduct):**

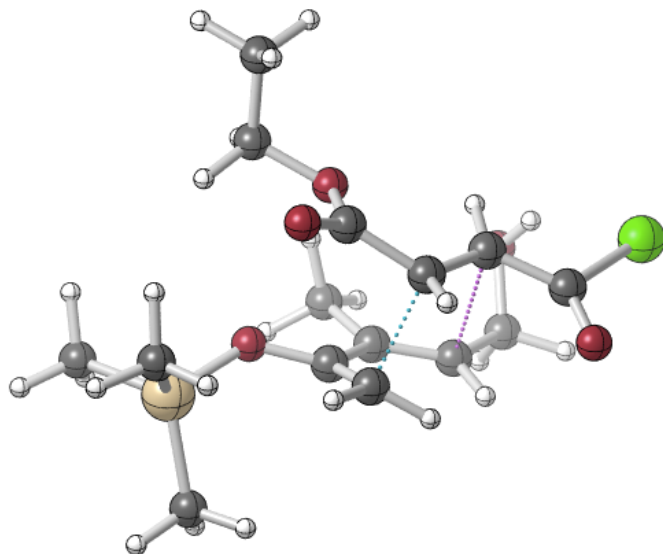

Charge = 0 Multiplicity = 1

mem = 50GB

Dipole moment (field-independent basis, Debye):

X = 8.1597 Y = -2.2281 Z = 1.5963 Tot = 8.6077

Link 0: opt=(calcfc,ts,noeigen) freq=noraman m062x/6-31g(d) scrf=(smd,solvent=dichloromethane)

Job cpu time: 1 days 18 hours 10 minutes 1.7 seconds.

File lengths (MBytes): RWF= 1056 Int= 0 D2E= 0 Chk= 22 Scr= 1

Normal termination of Gaussian 09 at Sun Oct 6 22:23:23 2013.

| Item                 | Value    | Threshold | Converged? |
|----------------------|----------|-----------|------------|
| Maximum Force        | 0.000025 | 0.000450  | YES        |
| RMS Force            | 0.000004 | 0.000300  | YES        |
| Maximum Displacement | 0.000803 | 0.001800  | YES        |
| RMS Displacement     | 0.000192 | 0.001200  | YES        |

Predicted change in Energy = -5.773393D-09

Optimization completed.

-- Stationary point found.

Link 1: N Geom=AllCheck Guess=TCHECK SCRF=Check GenChk RM062X/6-31G(d) Freq

Job cpu time: 0 days 3 hours 24 minutes 42.4 seconds.

File lengths (MBytes): RWF= 1056 Int= 0 D2E= 0 Chk= 31 Scr= 1

Normal termination of Gaussian 09 at Sun Oct 6 22:36:26 2013.

| Item                 | Value    | Threshold | Converged? |
|----------------------|----------|-----------|------------|
| Maximum Force        | 0.000025 | 0.000450  | YES        |
| RMS Force            | 0.000004 | 0.000300  | YES        |
| Maximum Displacement | 0.001013 | 0.001800  | YES        |
| RMS Displacement     | 0.000231 | 0.001200  | YES        |

Predicted change in Energy = -6.934533D-09

Optimization completed.

-- Stationary point found.

Values come from Link 1:

HF = -1711.9989726 hartrees (-1074296.47529623 kcal/mol)

Imaginary Frequencies: 1 (-383.8352 1/cm)

Zero-point correction = 0.384864 (Hartree/Particle)

Temperature 298.150 Kelvin. Pressure 1.00000 Atm.

Sum of electronic and thermal Free Energies =

-1711.671561 hartrees (-1074091.02124311 kcal/mol)

Comments:

Coordinates (from last standard orientation):

---

| Center | Atomic | Coordinates (Angstroms) |   |   |
|--------|--------|-------------------------|---|---|
| Number | Number | X                       | Y | Z |

---

|    |    |           |           |           |
|----|----|-----------|-----------|-----------|
| 1  | 6  | -3.080620 | 0.352505  | -1.359739 |
| 2  | 6  | -0.781102 | 1.052854  | -1.220941 |
| 3  | 6  | -1.991994 | 0.816312  | -0.571769 |
| 4  | 6  | -1.619592 | -1.802151 | 0.310900  |
| 5  | 6  | 0.305695  | -0.671984 | -1.511669 |
| 6  | 6  | -0.363073 | -1.503903 | 0.738263  |
| 7  | 6  | 0.621344  | -1.026766 | -0.204360 |
| 8  | 6  | -2.751963 | -2.159950 | 1.243732  |
| 9  | 6  | 3.770284  | 0.615103  | -1.464383 |
| 10 | 6  | 3.387969  | -2.454943 | -1.339117 |
| 11 | 6  | 4.485989  | -0.888917 | 1.110981  |
| 12 | 6  | 0.026703  | -1.514038 | 2.192648  |
| 13 | 6  | 0.293149  | 1.817723  | -0.517611 |
| 14 | 6  | 1.238163  | 2.313287  | 1.590083  |
| 15 | 6  | 0.994364  | 3.797337  | 1.772958  |
| 16 | 17 | -4.668713 | 0.275045  | -0.364539 |
| 17 | 1  | -0.792086 | 1.210637  | -2.296002 |
| 18 | 1  | -2.123792 | 1.003386  | 0.483604  |
| 19 | 1  | -1.824113 | -1.906520 | -0.750204 |
| 20 | 1  | 1.102184  | -0.310861 | -2.157078 |
| 21 | 1  | -0.512751 | -1.161310 | -2.027303 |
| 22 | 1  | -3.651691 | -2.384089 | 0.659602  |
| 23 | 1  | -2.494627 | -3.068993 | 1.800961  |
| 24 | 1  | 4.830531  | 0.562727  | -1.742929 |
| 25 | 1  | 3.186178  | 0.642409  | -2.389711 |
| 26 | 1  | 3.605249  | 1.560924  | -0.939063 |
| 27 | 1  | 2.665488  | -2.447683 | -2.162454 |
| 28 | 1  | 4.381626  | -2.621762 | -1.770826 |
| 29 | 1  | 3.154566  | -3.307253 | -0.691505 |
| 30 | 1  | 5.534683  | -0.979941 | 0.806424  |
| 31 | 1  | 4.387959  | 0.032473  | 1.695998  |

|    |    |           |           |           |
|----|----|-----------|-----------|-----------|
| 32 | 1  | 4.248261  | -1.733505 | 1.766470  |
| 33 | 1  | -3.454177 | -0.429971 | 1.754062  |
| 34 | 1  | 1.009444  | -1.976101 | 2.320858  |
| 35 | 1  | 0.095613  | -0.489197 | 2.575090  |
| 36 | 1  | -0.702448 | -2.051872 | 2.799448  |
| 37 | 1  | 2.195098  | 2.115572  | 1.100057  |
| 38 | 1  | 1.208126  | 1.781698  | 2.543084  |
| 39 | 1  | 0.016080  | 3.969990  | 2.230668  |
| 40 | 1  | 1.761632  | 4.217711  | 2.430112  |
| 41 | 1  | 1.035735  | 4.318785  | 0.813344  |
| 42 | 8  | -3.138251 | 0.008296  | -2.503832 |
| 43 | 8  | 1.808776  | -0.699301 | 0.324665  |
| 44 | 8  | -3.011123 | -1.160730 | 2.215236  |
| 45 | 8  | 0.187905  | 1.711511  | 0.809566  |
| 46 | 8  | 1.173548  | 2.420288  | -1.090280 |
| 47 | 14 | 3.366186  | -0.851310 | -0.379874 |

-----



**EndoTop TSS (asymmetric reaction; leads to *endo* cycloadduct):**

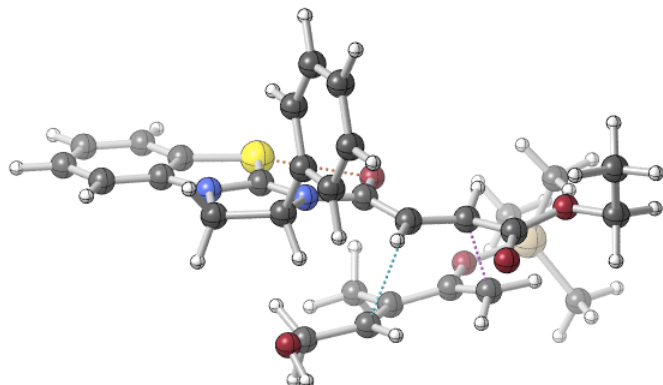

Charge = 1 Multiplicity = 1

mem = 57GB

Dipole moment (field-independent basis, Debye):

X = 6.4375 Y = 1.2759 Z = 3.3855 Tot = 7.3845

Link 0: opt=(calcfc,ts,noeigen) freq=noraman uM062X/6-31g(d) scrf=(smd,solvent=dichloromethane) guess=(mix,always)

Job cpu time: 27 days 6 hours 0 minutes 44.0 seconds.

File lengths (MBytes): RWF= 7631 Int= 0 D2E= 0 Chk= 62 Scr= 1

Normal termination of Gaussian 09 at Sat Oct 5 22:12:16 2013.

| Item                 | Value    | Threshold | Converged? |
|----------------------|----------|-----------|------------|
| Maximum Force        | 0.000024 | 0.000450  | YES        |
| RMS Force            | 0.000003 | 0.000300  | YES        |
| Maximum Displacement | 0.001122 | 0.001800  | YES        |
| RMS Displacement     | 0.000192 | 0.001200  | YES        |

Predicted change in Energy = -3.365820D-09

Optimization completed.

-- Stationary point found.

Link 1: N Geom=AllCheck Guess=TCheck SCRF=Check GenChk UM062X/6-31G(d) Freq

Job cpu time: 1 days 7 hours 5 minutes 19.8 seconds.

File lengths (MBytes): RWF= 7684 Int= 0 D2E= 0 Chk= 78 Scr= 1

Normal termination of Gaussian 09 at Sun Oct 6 00:09:28 2013.

| Item                 | Value    | Threshold | Converged? |
|----------------------|----------|-----------|------------|
| Maximum Force        | 0.000024 | 0.000450  | YES        |
| RMS Force            | 0.000003 | 0.000300  | YES        |
| Maximum Displacement | 0.002293 | 0.001800  | NO         |
| RMS Displacement     | 0.000421 | 0.001200  | YES        |

Predicted change in Energy = -1.806644D-08

Values come from Link 1:

HF = -2337.9289835 hartrees (-1467073.81643608 kcal/mol)

Imaginary Frequencies: 1 (-408.6019 1/cm)

Zero-point correction = 0.627069 (Hartree/Particle)

Temperature 298.150 Kelvin. Pressure 1.00000 Atm.

Sum of electronic and thermal Free Energies =

-2337.376333 hartrees (-1466727.02272083 kcal/mol)

Comments:

Coordinates (from last standard orientation):

```
-----  
Center      Atomic      Coordinates (Angstroms)  
Number      Number      X          Y          Z  
-----  
  1         6         6.011641  0.729163  0.255205  
  2         6         4.681109  0.851146 -0.130982  
  3         6         4.238845  1.915587 -0.927217  
  4         6         5.127429  2.891388 -1.363734
```

|    |   |           |           |           |
|----|---|-----------|-----------|-----------|
| 5  | 6 | 6.460553  | 2.773854  | -0.982110 |
| 6  | 6 | 6.894456  | 1.709117  | -0.183475 |
| 7  | 6 | 2.448520  | 0.374371  | -0.309824 |
| 8  | 6 | 3.494545  | -1.183271 | 1.038554  |
| 9  | 6 | 2.015532  | -1.614280 | 0.795617  |
| 10 | 6 | 1.857478  | -2.902071 | 0.018827  |
| 11 | 6 | 1.284281  | -4.010427 | 0.641746  |
| 12 | 6 | 2.295382  | -3.004451 | -1.304845 |
| 13 | 6 | 1.149375  | -5.213346 | -0.048813 |
| 14 | 6 | 2.157894  | -4.204314 | -1.994990 |
| 15 | 6 | 1.584804  | -5.310898 | -1.367620 |
| 16 | 6 | 0.100803  | -0.179761 | -0.290546 |
| 17 | 6 | -0.874580 | -1.039450 | 0.289809  |
| 18 | 6 | -2.205520 | -0.839067 | -0.055543 |
| 19 | 6 | -0.565119 | 0.961361  | 2.369900  |
| 20 | 6 | -3.157981 | 0.528074  | 1.164183  |
| 21 | 6 | 0.813746  | 1.050217  | 2.965953  |
| 22 | 6 | -2.421514 | 1.694247  | 0.978363  |
| 23 | 6 | -5.656825 | 2.995900  | 0.413861  |
| 24 | 6 | -4.433059 | 1.432199  | -1.995072 |
| 25 | 6 | -3.921916 | 4.448483  | -1.679842 |
| 26 | 6 | -1.123375 | 1.915352  | 1.584407  |
| 27 | 6 | -3.158267 | -1.941041 | 0.294901  |
| 28 | 6 | -5.228982 | -2.942795 | -0.257776 |
| 29 | 6 | -4.829547 | -4.231696 | -0.945119 |
| 30 | 6 | -0.394959 | 3.167914  | 1.175762  |
| 31 | 1 | 6.336245  | -0.101197 | 0.873592  |
| 32 | 1 | 4.793118  | 3.718627  | -1.981249 |
| 33 | 1 | 7.173215  | 3.522145  | -1.312383 |
| 34 | 1 | 7.939854  | 1.644614  | 0.099652  |
| 35 | 1 | 4.206275  | -1.950353 | 0.729145  |

|    |   |           |           |           |
|----|---|-----------|-----------|-----------|
| 36 | 1 | 3.666948  | -0.896836 | 2.078838  |
| 37 | 1 | 0.937449  | -3.929739 | 1.669354  |
| 38 | 1 | 2.742445  | -2.145680 | -1.802076 |
| 39 | 1 | 0.697859  | -6.069725 | 0.442537  |
| 40 | 1 | 2.496792  | -4.276180 | -3.024014 |
| 41 | 1 | 1.476016  | -6.246220 | -1.908290 |
| 42 | 1 | 1.499509  | -1.673057 | 1.755284  |
| 43 | 1 | -0.600109 | -1.824888 | 0.982612  |
| 44 | 1 | -1.139210 | 0.096376  | 2.689144  |
| 45 | 1 | -4.162110 | 0.474117  | 0.754439  |
| 46 | 1 | -3.014716 | -0.034577 | 2.078733  |
| 47 | 1 | -2.425115 | -0.293648 | -0.968920 |
| 48 | 1 | 1.542995  | 1.392596  | 2.223622  |
| 49 | 1 | 0.821975  | 1.794102  | 3.777550  |
| 50 | 1 | -5.861671 | 2.070981  | 0.961670  |
| 51 | 1 | -5.460122 | 3.787720  | 1.145157  |
| 52 | 1 | -6.568628 | 3.268251  | -0.130842 |
| 53 | 1 | -3.532067 | 1.324703  | -2.609858 |
| 54 | 1 | -4.641081 | 0.467743  | -1.519914 |
| 55 | 1 | -5.267338 | 1.655265  | -2.671723 |
| 56 | 1 | -3.730917 | 5.263659  | -0.973625 |
| 57 | 1 | -3.057736 | 4.368033  | -2.347876 |
| 58 | 1 | -4.790120 | 4.727346  | -2.287485 |
| 59 | 1 | -6.149140 | -2.532363 | -0.676249 |
| 60 | 1 | -5.351937 | -3.078894 | 0.819036  |
| 61 | 1 | -5.620219 | -4.976737 | -0.816084 |
| 62 | 1 | -4.682851 | -4.064894 | -2.015948 |
| 63 | 1 | -3.905461 | -4.630308 | -0.518323 |
| 64 | 1 | 0.772698  | -0.447154 | 4.217842  |
| 65 | 1 | -0.238701 | 3.170590  | 0.092242  |
| 66 | 1 | -0.988660 | 4.054301  | 1.421154  |

|    |    |           |           |           |
|----|----|-----------|-----------|-----------|
| 67 | 1  | 0.572245  | 3.261908  | 1.673292  |
| 68 | 8  | -0.108835 | 0.779965  | -1.033128 |
| 69 | 8  | -2.785073 | 2.635499  | 0.109384  |
| 70 | 8  | -2.975446 | -2.740483 | 1.185108  |
| 71 | 8  | -4.241620 | -1.914191 | -0.486339 |
| 72 | 8  | 1.285065  | -0.203221 | 3.429524  |
| 73 | 7  | 3.623440  | 0.002858  | 0.182099  |
| 74 | 7  | 1.462132  | -0.447311 | 0.045747  |
| 75 | 16 | 2.495052  | 1.813505  | -1.251580 |
| 76 | 14 | -4.233484 | 2.843921  | -0.787396 |

---

**ExoBottom TSS (asymmetric reaction; leads to exo cycloadduct):**

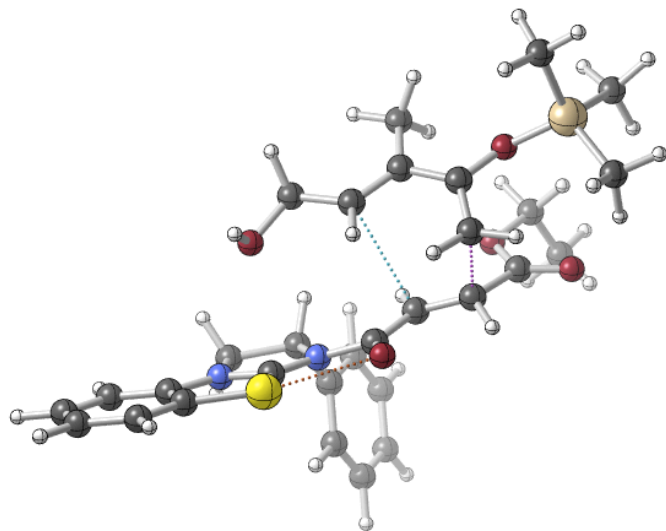

Charge = 1 Multiplicity = 1

mem = 55GB

Dipole moment (field-independent basis, Debye):

X = -8.3541 Y = -2.6696 Z = 6.9204 Tot = 11.1718

Link 0: opt=(calcfc,ts,noeigen) freq=noraman M062X/6-31g(d) scrf=(smd,solvent=dichloromethane)

Job cpu time: 1 days 4 hours 58 minutes 5.1 seconds.

File lengths (MBytes): RWF= 4155 Int= 0 D2E= 0 Chk= 50 Scr= 1

Normal termination of Gaussian 09 at Sun Sep 22 12:21:14 2013.

| Item                 | Value    | Threshold | Converged? |
|----------------------|----------|-----------|------------|
| Maximum Force        | 0.000401 | 0.000450  | YES        |
| RMS Force            | 0.000080 | 0.000300  | YES        |
| Maximum Displacement | 0.000633 | 0.001800  | YES        |
| RMS Displacement     | 0.000128 | 0.001200  | YES        |

Predicted change in Energy = 1.881745D-05

Optimization completed.

-- Stationary point found.

Link 1: N Geom=AllCheck Guess=TChech SCRF=Check GenChk RM062X/6-31G(d) Freq

Job cpu time: 0 days 16 hours 23 minutes 9.4 seconds.

File lengths (MBytes): RWF= 4181 Int= 0 D2E= 0 Chk= 65 Scr= 1

Normal termination of Gaussian 09 at Sun Sep 22 13:23:07 2013.

| Item                 | Value    | Threshold | Converged? |
|----------------------|----------|-----------|------------|
| Maximum Force        | 0.000401 | 0.000450  | YES        |
| RMS Force            | 0.000080 | 0.000300  | YES        |
| Maximum Displacement | 0.000584 | 0.001800  | YES        |
| RMS Displacement     | 0.000082 | 0.001200  | YES        |

Predicted change in Energy = -4.003895D-07

Optimization completed.

-- Stationary point found.

Values come from Link 1:

HF = -2337.9292947 hartrees (-1467074.0117172 kcal/mol)

Imaginary Frequencies: 1 (-395.0181 1/cm)

Zero-point correction = 0.627771 (Hartree/Particle)

Temperature 298.150 Kelvin. Pressure 1.00000 Atm.

Sum of electronic and thermal Free Energies =

-2337.374439 hartrees (-1466725.83421689 kcal/mol)

Comments:

Coordinates (from last standard orientation):

---

| Center | Atomic | Coordinates (Angstroms) |   |   |
|--------|--------|-------------------------|---|---|
| Number | Number | X                       | Y | Z |

---

|    |   |           |           |           |
|----|---|-----------|-----------|-----------|
| 1  | 6 | -6.221235 | -0.868759 | 1.043138  |
| 2  | 6 | -5.083461 | -0.928456 | 0.245046  |
| 3  | 6 | -4.952277 | -1.871346 | -0.782465 |
| 4  | 6 | -5.968435 | -2.783912 | -1.041659 |
| 5  | 6 | -7.108731 | -2.730357 | -0.245492 |
| 6  | 6 | -7.231491 | -1.787076 | 0.781862  |
| 7  | 6 | -2.999579 | -0.423752 | -0.553690 |
| 8  | 6 | -3.519924 | 0.920433  | 1.250457  |
| 9  | 6 | -2.088525 | 1.268488  | 0.730754  |
| 10 | 6 | -1.920608 | 2.710779  | 0.310756  |
| 11 | 6 | -1.086379 | 3.552900  | 1.044547  |
| 12 | 6 | -2.617734 | 3.213872  | -0.790410 |
| 13 | 6 | -0.950415 | 4.892587  | 0.684607  |
| 14 | 6 | -2.478050 | 4.549616  | -1.152366 |
| 15 | 6 | -1.645261 | 5.391231  | -0.413938 |
| 16 | 6 | -0.707662 | 0.020478  | -1.109161 |
| 17 | 6 | 1.661999  | 0.381631  | -1.354445 |
| 18 | 6 | 0.482998  | 0.646915  | -0.653930 |
| 19 | 6 | 0.606811  | -1.552235 | 1.259747  |
| 20 | 6 | 2.320754  | -1.497322 | -1.067275 |
| 21 | 6 | 1.945484  | -1.378162 | 1.396819  |
| 22 | 6 | 2.806515  | -1.433869 | 0.234913  |
| 23 | 6 | -0.386872 | -1.427162 | 2.384921  |
| 24 | 6 | 5.543461  | -1.768905 | -2.083400 |
| 25 | 6 | 5.684681  | -3.516334 | 0.449776  |
| 26 | 6 | 6.838887  | -0.619006 | 0.440947  |
| 27 | 6 | 2.593440  | -1.019608 | 2.708516  |
| 28 | 6 | 2.921049  | 1.103170  | -0.985275 |
| 29 | 6 | 4.057199  | 2.229312  | 0.757220  |
| 30 | 6 | 4.151971  | 3.646503  | 0.229999  |
| 31 | 1 | -6.306579 | -0.132512 | 1.835837  |



|    |   |           |           |           |
|----|---|-----------|-----------|-----------|
| 32 | 1 | -5.873672 | -3.517143 | -1.836252 |
| 33 | 1 | -7.914164 | -3.434114 | -0.426472 |
| 34 | 1 | -8.131542 | -1.770286 | 1.387234  |
| 35 | 1 | -4.202163 | 1.770542  | 1.185761  |
| 36 | 1 | -3.498870 | 0.520454  | 2.265087  |
| 37 | 1 | -0.539872 | 3.157305  | 1.897816  |
| 38 | 1 | -3.265650 | 2.557890  | -1.368123 |
| 39 | 1 | -0.298831 | 5.542352  | 1.260964  |
| 40 | 1 | -3.018102 | 4.935287  | -2.011792 |
| 41 | 1 | -1.537861 | 6.433677  | -0.698001 |
| 42 | 1 | -1.351324 | 1.011504  | 1.494841  |
| 43 | 1 | 1.587254  | 0.156804  | -2.415338 |
| 44 | 1 | 0.489786  | 1.253706  | 0.240510  |
| 45 | 1 | 0.184770  | -1.909952 | 0.323831  |
| 46 | 1 | 3.038739  | -1.573014 | -1.876237 |
| 47 | 1 | 1.354091  | -1.946696 | -1.267955 |
| 48 | 1 | -0.207664 | -2.208498 | 3.137546  |
| 49 | 1 | -0.268744 | -0.465823 | 2.897205  |
| 50 | 1 | 6.578389  | -1.924043 | -2.414764 |
| 51 | 1 | 4.937962  | -2.568331 | -2.522600 |
| 52 | 1 | 5.206589  | -0.806701 | -2.482986 |
| 53 | 1 | 5.821573  | -3.521280 | 1.536489  |
| 54 | 1 | 4.785332  | -4.099265 | 0.218564  |
| 55 | 1 | 6.538594  | -4.033596 | -0.002362 |
| 56 | 1 | 7.834990  | -1.056720 | 0.306964  |
| 57 | 1 | 6.820460  | 0.333482  | -0.099973 |
| 58 | 1 | 6.701716  | -0.415714 | 1.508192  |
| 59 | 1 | -1.944906 | -2.404751 | 1.737113  |
| 60 | 1 | 3.072322  | -0.036805 | 2.643577  |
| 61 | 1 | 1.872776  | -1.003650 | 3.528043  |
| 62 | 1 | 3.376435  | -1.742828 | 2.958805  |

|    |    |           |           |           |
|----|----|-----------|-----------|-----------|
| 63 | 1  | 4.930192  | 1.630246  | 0.486579  |
| 64 | 1  | 3.940354  | 2.216376  | 1.842314  |
| 65 | 1  | 3.246287  | 4.207816  | 0.478541  |
| 66 | 1  | 5.007789  | 4.151286  | 0.688061  |
| 67 | 1  | 4.286082  | 3.649963  | -0.854219 |
| 68 | 8  | -0.796949 | -0.820217 | -2.008391 |
| 69 | 8  | 4.090614  | -1.148400 | 0.470204  |
| 70 | 8  | -1.728591 | -1.476428 | 1.923734  |
| 71 | 8  | 2.873061  | 1.571780  | 0.263779  |
| 72 | 8  | 3.885932  | 1.193474  | -1.712832 |
| 73 | 7  | -3.946555 | -0.130966 | 0.324095  |
| 74 | 7  | -1.911405 | 0.331306  | -0.412556 |
| 75 | 16 | -3.388583 | -1.723662 | -1.610891 |
| 76 | 14 | 5.534737  | -1.776596 | -0.214599 |

-----

**EndoTop TSS (background reaction; leads to enantiomer of *endo* cycloadduct)**

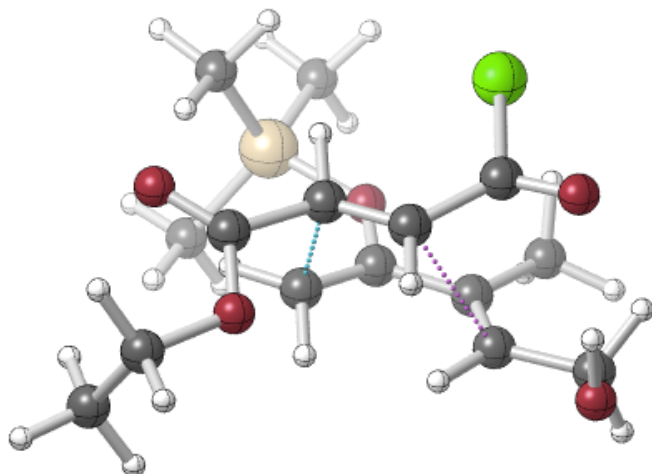

Charge = 0 Multiplicity = 1

HF = -1712.0020168 hartrees (-1074298.38556217 kcal/mol)

Imaginary Frequencies: 1 (-367.8342 1/cm)

Zero-point correction = 0.385144 (Hartree/Particle)

Temperature 298.150 Kelvin. Pressure 1.00000 Atm.

Sum of electronic and thermal Free Energies =

-1711.674659 hartrees (-1074092.96526909 kcal/mol)

Coordinates (from last standard orientation):

---

| Center<br>Number | Atomic<br>Number | Coordinates (Angstroms) |           |           |
|------------------|------------------|-------------------------|-----------|-----------|
|                  |                  | X                       | Y         | Z         |
| 1                | 6                | -2.076063               | 1.207211  | -1.334218 |
| 2                | 6                | -1.896097               | -0.116505 | -0.837998 |
| 3                | 6                | -0.715221               | -0.846522 | -0.891264 |
| 4                | 6                | -1.508005               | 1.341130  | 1.492633  |
| 5                | 6                | 0.381392                | -0.733495 | 0.897915  |

---

|    |    |           |           |           |
|----|----|-----------|-----------|-----------|
| 6  | 6  | -2.638916 | 2.324655  | 1.611478  |
| 7  | 6  | 0.739783  | 0.608183  | 0.971809  |
| 8  | 6  | 4.539213  | 1.548485  | -0.295813 |
| 9  | 6  | 2.931618  | -0.784604 | -1.489580 |
| 10 | 6  | 3.913553  | -0.899430 | 1.469268  |
| 11 | 6  | -0.201299 | 1.657391  | 1.288986  |
| 12 | 6  | 0.294000  | 3.077842  | 1.215079  |
| 13 | 6  | -0.767943 | -2.338458 | -0.787996 |
| 14 | 6  | -1.895911 | -4.189418 | 0.151935  |
| 15 | 6  | -0.966863 | -4.620068 | 1.267853  |
| 16 | 17 | -0.581647 | 1.953102  | -2.107716 |
| 17 | 1  | -2.793754 | -0.555576 | -0.414438 |
| 18 | 1  | -1.811728 | 0.312341  | 1.656705  |
| 19 | 1  | 1.155845  | -1.469231 | 0.703680  |
| 20 | 1  | -0.437507 | -1.087580 | 1.512035  |
| 21 | 1  | 0.092249  | -0.508735 | -1.531568 |
| 22 | 1  | -2.492900 | 3.163756  | 0.917046  |
| 23 | 1  | -2.661969 | 2.742260  | 2.626930  |
| 24 | 1  | 5.482969  | 1.139207  | -0.673492 |
| 25 | 1  | 4.145489  | 2.236455  | -1.051522 |
| 26 | 1  | 4.762118  | 2.128835  | 0.605984  |
| 27 | 1  | 2.216397  | -1.600978 | -1.340632 |
| 28 | 1  | 2.536432  | -0.120168 | -2.266994 |
| 29 | 1  | 3.858140  | -1.224960 | -1.878932 |
| 30 | 1  | 4.898070  | -1.314702 | 1.222961  |
| 31 | 1  | 4.021964  | -0.311151 | 2.387287  |
| 32 | 1  | 0.573162  | 3.343953  | 0.190283  |
| 33 | 1  | -0.458514 | 3.784351  | 1.569509  |
| 34 | 1  | 1.188910  | 3.196659  | 1.833584  |
| 35 | 1  | -3.972161 | 1.608643  | 0.424338  |
| 36 | 1  | -2.941987 | -4.358978 | 0.411039  |

|    |    |           |           |           |
|----|----|-----------|-----------|-----------|
| 37 | 1  | -1.670245 | -4.702945 | -0.785216 |
| 38 | 1  | -1.199212 | -4.079790 | 2.190339  |
| 39 | 1  | -1.088871 | -5.691090 | 1.455139  |
| 40 | 1  | 0.076183  | -4.433895 | 0.997531  |
| 41 | 1  | 3.243475  | -1.738419 | 1.681344  |
| 42 | 8  | -3.075956 | 1.884332  | -1.337814 |
| 43 | 8  | 1.935831  | 1.048263  | 0.572760  |
| 44 | 8  | -3.885875 | 1.697387  | 1.389480  |
| 45 | 8  | -1.804700 | -2.765473 | -0.063167 |
| 46 | 8  | 0.056830  | -3.067766 | -1.293931 |
| 47 | 14 | 3.325496  | 0.181906  | 0.062077  |

---

**ExoBottom TSS (background reaction; leads to enantiomer of exo cycloadduct)**

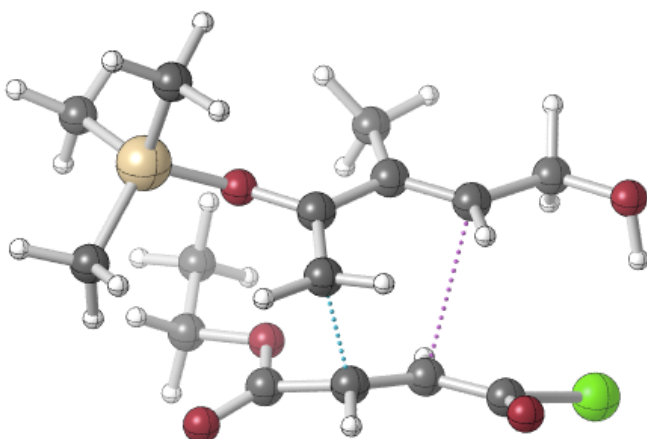

Charge = 0 Multiplicity = 1

HF = -1711.9989996 hartrees (-1074296.492239 kcal/mol)

Imaginary Frequencies: 1 (-386.7660 1/cm)

Zero-point correction = 0.383850 (Hartree/Particle)

Temperature 298.150 Kelvin. Pressure 1.00000 Atm.

Sum of electronic and thermal Free Energies =

-1711.672772 hartrees (-1074091.78115772 kcal/mol)

Coordinates (from last standard orientation):

---

| Center<br>Number | Atomic<br>Number | Coordinates (Angstroms) |           |           |
|------------------|------------------|-------------------------|-----------|-----------|
|                  |                  | X                       | Y         | Z         |
| 1                | 6                | -0.773704               | -1.406040 | -1.011874 |
| 2                | 6                | -1.912111               | -1.171218 | -0.240667 |
| 3                | 6                | -1.713875               | 1.648816  | 0.116832  |
| 4                | 6                | 0.206660                | 0.314481  | -1.574844 |
| 5                | 6                | -0.433220               | 1.476396  | 0.535003  |

---

|    |    |           |           |           |
|----|----|-----------|-----------|-----------|
| 6  | 6  | 0.541508  | 0.880781  | -0.349278 |
| 7  | 6  | -2.833457 | 2.185973  | 0.969347  |
| 8  | 6  | -0.006883 | 1.754847  | 1.952040  |
| 9  | 6  | 0.409067  | -2.075201 | -0.390224 |
| 10 | 6  | 1.707907  | -2.294000 | 1.558896  |
| 11 | 1  | -0.908098 | -1.666488 | -2.058315 |
| 12 | 1  | -3.037176 | 1.499367  | 1.805153  |
| 13 | 1  | -2.530835 | 3.141808  | 1.414705  |
| 14 | 1  | -4.444986 | 1.600225  | 0.060433  |
| 15 | 1  | 0.948774  | 2.285864  | 1.977636  |
| 16 | 1  | -0.747884 | 2.351397  | 2.487499  |
| 17 | 1  | 0.130068  | 0.813135  | 2.495863  |
| 18 | 1  | 1.616322  | -3.379379 | 1.664415  |
| 19 | 8  | 1.753589  | 0.694239  | 0.186771  |
| 20 | 8  | -3.997218 | 2.447184  | 0.214779  |
| 21 | 8  | 0.520928  | -1.799109 | 0.910063  |
| 22 | 8  | 1.191861  | -2.761040 | -1.010218 |
| 23 | 1  | -1.902443 | -1.242330 | 0.837146  |
| 24 | 6  | 1.826305  | -1.599104 | 2.894445  |
| 25 | 1  | 2.692427  | -1.993707 | 3.434048  |
| 26 | 1  | 1.964707  | -0.523141 | 2.752839  |
| 27 | 1  | 0.933692  | -1.768374 | 3.503903  |
| 28 | 1  | 2.570370  | -2.085955 | 0.918946  |
| 29 | 6  | -3.116833 | -0.857670 | -0.918598 |
| 30 | 17 | -4.577000 | -0.811753 | 0.281692  |
| 31 | 8  | -3.354400 | -0.620458 | -2.066275 |
| 32 | 14 | 3.298211  | 0.834114  | -0.545806 |
| 33 | 6  | 3.646554  | -0.576064 | -1.721619 |
| 34 | 1  | 4.729906  | -0.637418 | -1.885288 |
| 35 | 1  | 3.311203  | -1.538055 | -1.320144 |
| 36 | 1  | 3.177225  | -0.436264 | -2.701178 |

|    |   |           |           |           |
|----|---|-----------|-----------|-----------|
| 37 | 6 | 4.433765  | 0.768079  | 0.931857  |
| 38 | 1 | 4.155640  | 1.523376  | 1.675137  |
| 39 | 1 | 4.396648  | -0.214568 | 1.416044  |
| 40 | 1 | 5.472404  | 0.952771  | 0.635236  |
| 41 | 6 | 3.322728  | 2.479816  | -1.426888 |
| 42 | 1 | 2.559067  | 2.515959  | -2.212252 |
| 43 | 1 | 3.135933  | 3.306723  | -0.733117 |
| 44 | 1 | 4.295910  | 2.648132  | -1.901979 |
| 45 | 1 | 1.000495  | -0.101969 | -2.188723 |
| 46 | 1 | -0.649063 | 0.688740  | -2.124678 |
| 47 | 1 | -1.980799 | 1.516468  | -0.928344 |

---



**EndoBottom TSS (asymmetric reaction; leads to enantiomer of *endo* cycloadduct)**

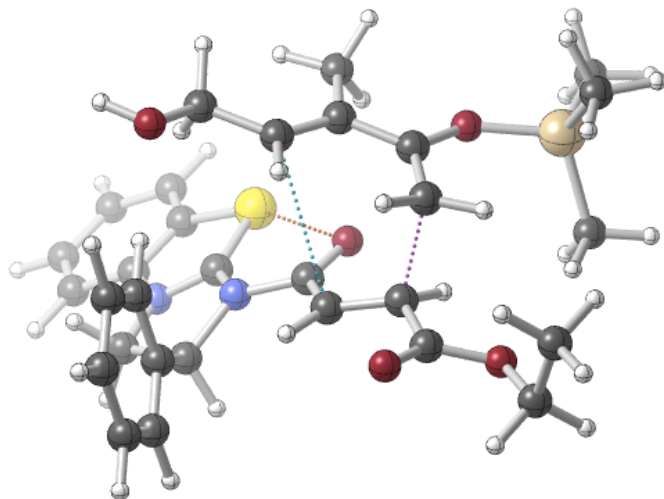

Charge = 1 Multiplicity = 1

HF = -2337.9215634 hartrees (-1467069.16024913 kcal/mol)

Imaginary Frequencies: 1 (-411.3635 1/cm)

Zero-point correction = 0.626765 (Hartree/Particle)

Temperature 298.150 Kelvin. Pressure 1.00000 Atm.

Sum of electronic and thermal Free Energies =

-2337.369239 hartrees (-1466722.57116489 kcal/mol)

Coordinates (from last standard orientation):

---

| Center<br>Number | Atomic<br>Number | Coordinates (Angstroms) |           |           |
|------------------|------------------|-------------------------|-----------|-----------|
|                  |                  | X                       | Y         | Z         |
| 1                | 6                | 6.243099                | -0.617570 | -0.881687 |
| 2                | 6                | 4.881202                | -0.876343 | -0.766347 |
| 3                | 6                | 4.389159                | -2.175111 | -0.587697 |
| 4                | 6                | 5.256763                | -3.260418 | -0.528746 |
| 5                | 6                | 6.620297                | -3.008335 | -0.642463 |

---

|    |   |           |           |           |
|----|---|-----------|-----------|-----------|
| 6  | 6 | 7.104724  | -1.705798 | -0.815553 |
| 7  | 6 | 2.626519  | -0.483094 | -0.641321 |
| 8  | 6 | 3.772619  | 1.502996  | -0.851492 |
| 9  | 6 | 2.247644  | 1.757736  | -1.013762 |
| 10 | 6 | 1.777263  | 2.945914  | -0.213394 |
| 11 | 6 | 1.532121  | 4.151811  | -0.869682 |
| 12 | 6 | 1.605067  | 2.859059  | 1.168244  |
| 13 | 6 | 1.124551  | 5.270009  | -0.144576 |
| 14 | 6 | 1.176638  | 3.969462  | 1.888004  |
| 15 | 6 | 0.942051  | 5.178509  | 1.233194  |
| 16 | 6 | 0.279295  | 0.026971  | -0.685641 |
| 17 | 6 | -0.714520 | 1.041035  | -0.680999 |
| 18 | 6 | -2.023352 | 0.645570  | -0.929095 |
| 19 | 6 | -0.617942 | 0.064704  | 2.416406  |
| 20 | 6 | -3.045879 | 0.036371  | 0.766609  |
| 21 | 6 | 0.625531  | 0.131875  | 3.255322  |
| 22 | 6 | -2.349819 | -1.105872 | 1.141843  |
| 23 | 6 | -4.257051 | -2.242394 | -1.759462 |
| 24 | 6 | -5.595179 | -2.410713 | 1.041973  |
| 25 | 6 | -3.858562 | -4.744503 | 0.005155  |
| 26 | 6 | -1.129280 | -1.090903 | 1.940966  |
| 27 | 6 | -3.011768 | 1.739057  | -1.204744 |
| 28 | 6 | -5.097513 | 2.226833  | -2.207441 |
| 29 | 6 | -6.057774 | 2.227911  | -1.036079 |
| 30 | 6 | -0.455758 | -2.422706 | 2.142981  |
| 31 | 1 | 6.607871  | 0.395383  | -1.016500 |
| 32 | 1 | 4.881932  | -4.270122 | -0.395437 |
| 33 | 1 | 7.318473  | -3.837358 | -0.595236 |
| 34 | 1 | 8.173469  | -1.539512 | -0.900565 |
| 35 | 1 | 4.158125  | 1.905526  | 0.089098  |
| 36 | 1 | 4.346614  | 1.891892  | -1.692681 |

|    |   |           |           |           |
|----|---|-----------|-----------|-----------|
| 37 | 1 | 1.653476  | 4.213161  | -1.948373 |
| 38 | 1 | 1.779013  | 1.919394  | 1.683964  |
| 39 | 1 | 0.936218  | 6.206913  | -0.659844 |
| 40 | 1 | 1.013904  | 3.877260  | 2.956910  |
| 41 | 1 | 0.609449  | 6.045719  | 1.795728  |
| 42 | 1 | 2.003004  | 1.902381  | -2.070929 |
| 43 | 1 | -0.488144 | 2.075696  | -0.464295 |
| 44 | 1 | -1.118684 | 1.017650  | 2.264539  |
| 45 | 1 | -4.031364 | -0.080691 | 0.323817  |
| 46 | 1 | -2.900543 | 0.948086  | 1.333127  |
| 47 | 1 | -2.194561 | -0.291485 | -1.451955 |
| 48 | 1 | 0.578332  | -0.621406 | 4.054524  |
| 49 | 1 | 1.510710  | -0.110918 | 2.641866  |
| 50 | 1 | -4.406340 | -1.157616 | -1.794099 |
| 51 | 1 | -3.357365 | -2.484409 | -2.336099 |
| 52 | 1 | -5.108636 | -2.711166 | -2.267847 |
| 53 | 1 | -5.389821 | -2.594140 | 2.102429  |
| 54 | 1 | -5.881307 | -1.360715 | 0.926195  |
| 55 | 1 | -6.463011 | -3.020895 | 0.764239  |
| 56 | 1 | -2.944667 | -5.013026 | -0.535591 |
| 57 | 1 | -3.767575 | -5.118281 | 1.030682  |
| 58 | 1 | -4.695546 | -5.267866 | -0.470608 |
| 59 | 1 | -5.572497 | 1.863616  | -3.119776 |
| 60 | 1 | -4.676862 | 3.217902  | -2.388432 |
| 61 | 1 | -6.887690 | 2.911182  | -1.239557 |
| 62 | 1 | -6.468622 | 1.226567  | -0.874553 |
| 63 | 1 | -5.554815 | 2.560310  | -0.123240 |
| 64 | 1 | 1.506628  | 1.462059  | 4.368529  |
| 65 | 1 | -1.092741 | -3.099877 | 2.722222  |
| 66 | 1 | -0.277911 | -2.893201 | 1.171782  |
| 67 | 1 | 0.500390  | -2.323870 | 2.659869  |

|    |    |           |           |           |
|----|----|-----------|-----------|-----------|
| 68 | 8  | 0.075124  | -1.186896 | -0.751647 |
| 69 | 8  | -2.696216 | -2.314278 | 0.715262  |
| 70 | 8  | -2.915272 | 2.867229  | -0.780156 |
| 71 | 8  | -4.017741 | 1.299640  | -1.967537 |
| 72 | 8  | 0.719714  | 1.434164  | 3.801706  |
| 73 | 7  | 3.833583  | 0.039606  | -0.809060 |
| 74 | 7  | 1.656437  | 0.438910  | -0.608732 |
| 75 | 16 | 2.618116  | -2.196500 | -0.484525 |
| 76 | 14 | -4.134619 | -2.902929 | -0.017933 |

---

**ExoTop TSS (asymmetric reaction; leads to enantiomer of exo cycloadduct)**

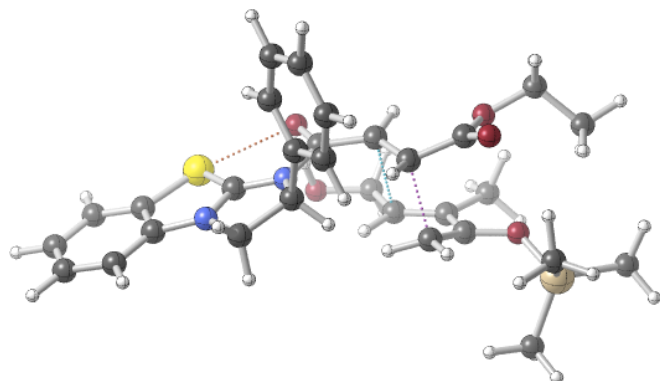

Charge = 1 Multiplicity = 1

HF = -2337.9166877 hartrees (-1467066.10069863 kcal/mol)

Imaginary Frequencies: 1 (-416.3988 1/cm)

Zero-point correction = 0.627953 (Hartree/Particle)

Temperature 298.150 Kelvin. Pressure 1.00000 Atm.

Sum of electronic and thermal Free Energies =

-2337.361318 hartrees (-1466717.60065818 kcal/mol)

Coordinates (from last standard orientation):

---

| Center<br>Number | Atomic<br>Number | Coordinates (Angstroms) |           |           |
|------------------|------------------|-------------------------|-----------|-----------|
|                  |                  | X                       | Y         | Z         |
| 1                | 6                | -5.889345               | -0.097916 | 2.085546  |
| 2                | 6                | -4.971356               | -0.405723 | 1.086367  |
| 3                | 6                | -5.258980               | -1.333089 | 0.077906  |
| 4                | 6                | -6.489715               | -1.979866 | 0.038473  |
| 5                | 6                | -7.411501               | -1.677668 | 1.034521  |
| 6                | 6                | -7.114787               | -0.750760 | 2.042551  |
| 7                | 6                | -3.019651               | -0.378880 | -0.112886 |

|    |   |           |           |           |
|----|---|-----------|-----------|-----------|
| 8  | 6 | -2.862870 | 1.019253  | 1.714416  |
| 9  | 6 | -1.625010 | 1.220535  | 0.788868  |
| 10 | 6 | -1.595134 | 2.577671  | 0.115485  |
| 11 | 6 | -0.940912 | 3.626664  | 0.766177  |
| 12 | 6 | -2.242457 | 2.814172  | -1.098544 |
| 13 | 6 | -0.934654 | 4.901971  | 0.208882  |
| 14 | 6 | -2.232007 | 4.091006  | -1.655405 |
| 15 | 6 | -1.580534 | 5.135894  | -1.003775 |
| 16 | 6 | -0.940393 | -0.273747 | -1.300884 |
| 17 | 6 | 0.432067  | 0.093779  | -1.383417 |
| 18 | 6 | 1.224308  | 0.812311  | -0.488336 |
| 19 | 6 | 1.044092  | -2.588595 | -0.535804 |
| 20 | 6 | 1.829361  | -0.337350 | 1.116465  |
| 21 | 6 | 0.510543  | -3.568575 | -1.547942 |
| 22 | 6 | 2.740094  | -1.213640 | 0.531204  |
| 23 | 6 | 6.728796  | -0.818338 | 1.442639  |
| 24 | 6 | 4.433730  | -1.510184 | 3.404705  |
| 25 | 6 | 4.721484  | 1.365853  | 2.284833  |
| 26 | 6 | 2.351133  | -2.261880 | -0.387638 |
| 27 | 6 | 3.436300  | -2.859871 | -1.244682 |
| 28 | 6 | 2.563238  | 1.292232  | -0.966272 |
| 29 | 6 | 4.319652  | 0.940577  | -2.513646 |
| 30 | 6 | 5.527887  | 0.627318  | -1.656941 |
| 31 | 1 | -5.648145 | 0.621772  | 2.861174  |
| 32 | 1 | -6.720180 | -2.698150 | -0.741594 |
| 33 | 1 | -8.377818 | -2.170702 | 1.028460  |
| 34 | 1 | -7.855134 | -0.538629 | 2.806575  |
| 35 | 1 | -3.392831 | 1.954195  | 1.901940  |
| 36 | 1 | -2.602916 | 0.532866  | 2.657279  |
| 37 | 1 | -0.429467 | 3.441535  | 1.708533  |
| 38 | 1 | -2.748081 | 2.007189  | -1.624011 |

|    |   |           |           |           |
|----|---|-----------|-----------|-----------|
| 39 | 1 | -0.418481 | 5.710110  | 0.717623  |
| 40 | 1 | -2.731690 | 4.266136  | -2.603179 |
| 41 | 1 | -1.570181 | 6.128737  | -1.442959 |
| 42 | 1 | -0.723649 | 1.065503  | 1.381858  |
| 43 | 1 | 0.896000  | -0.302998 | -2.278010 |
| 44 | 1 | 0.295165  | -2.218157 | 0.159442  |
| 45 | 1 | 2.205314  | 0.416336  | 1.803538  |
| 46 | 1 | 0.817404  | -0.674386 | 1.309197  |
| 47 | 1 | 0.798604  | 1.531516  | 0.200189  |
| 48 | 1 | 0.897610  | -4.571453 | -1.324345 |
| 49 | 1 | 0.873567  | -3.308861 | -2.553760 |
| 50 | 1 | 7.390222  | -0.766358 | 2.315594  |
| 51 | 1 | 6.818956  | -1.822934 | 1.015329  |
| 52 | 1 | 7.098168  | -0.098302 | 0.705368  |
| 53 | 1 | 3.375470  | -1.359267 | 3.644742  |
| 54 | 1 | 4.589049  | -2.574924 | 3.199661  |
| 55 | 1 | 5.015961  | -1.251459 | 4.296774  |
| 56 | 1 | 5.623358  | 1.770120  | 2.760578  |
| 57 | 1 | 4.549450  | 1.926280  | 1.359478  |
| 58 | 1 | 4.287174  | -3.170471 | -0.631729 |
| 59 | 1 | 3.079638  | -3.728396 | -1.801387 |
| 60 | 1 | 3.806176  | -2.115805 | -1.959750 |
| 61 | 1 | -1.231577 | -2.828297 | -1.910843 |
| 62 | 1 | 4.351814  | 0.400166  | -3.461258 |
| 63 | 1 | 4.238474  | 2.011637  | -2.715344 |
| 64 | 1 | 5.587467  | -0.443055 | -1.442486 |
| 65 | 1 | 6.433659  | 0.930944  | -2.191761 |
| 66 | 1 | 5.482170  | 1.175362  | -0.712105 |
| 67 | 1 | 3.881175  | 1.559578  | 2.960411  |
| 68 | 8 | -1.505180 | -0.987605 | -2.143616 |
| 69 | 8 | 4.051708  | -0.983555 | 0.601940  |

|    |    |           |           |           |
|----|----|-----------|-----------|-----------|
| 70 | 8  | -0.897123 | -3.651525 | -1.514275 |
| 71 | 8  | 3.088864  | 0.499427  | -1.899936 |
| 72 | 8  | 3.090525  | 2.297722  | -0.543708 |
| 73 | 7  | -3.689497 | 0.111179  | 0.918120  |
| 74 | 7  | -1.768381 | 0.110557  | -0.200291 |
| 75 | 16 | -3.907830 | -1.506994 | -1.055043 |
| 76 | 14 | 4.974136  | -0.458734 | 1.956874  |

---



**Endo cycloadduct (background reaction):**

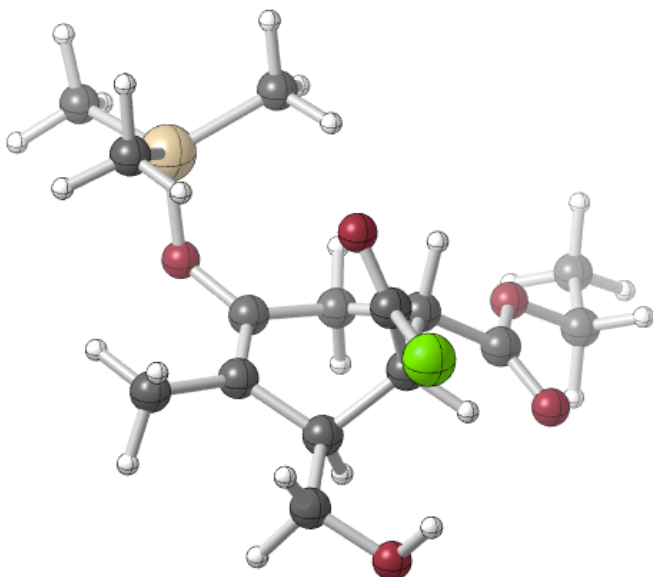

Charge = 0 Multiplicity = 1  
mem = 57GB

Link 0: opt freq=noraman M062X/6-31g(d) scrf=(smd,solvent=dichloromethane)

Job cpu time: 0 days 5 hours 19 minutes 13.0 seconds.

File lengths (MBytes): RWF= 404 Int= 0 D2E= 0 Chk= 17 Scr= 1

Normal termination of Gaussian 09 at Thu Oct 10 13:36:14 2013.

| Item                 | Value    | Threshold | Converged? |
|----------------------|----------|-----------|------------|
| Maximum Force        | 0.000017 | 0.000450  | YES        |
| RMS Force            | 0.000003 | 0.000300  | YES        |
| Maximum Displacement | 0.001359 | 0.001800  | YES        |
| RMS Displacement     | 0.000361 | 0.001200  | YES        |

Predicted change in Energy = -1.496742D-08

Optimization completed.

-- Stationary point found.

Link 1: N Geom=AllCheck Guess=TCheck SCRF=Check GenChk RM062X/6-31G(d) Freq

Job cpu time: 0 days 3 hours 17 minutes 47.3 seconds.

File lengths (MBytes): RWF= 1057 Int= 0 D2E= 0 Chk= 24 Scr= 1

Normal termination of Gaussian 09 at Thu Oct 10 13:48:51 2013.

| Item                 | Value    | Threshold | Converged? |
|----------------------|----------|-----------|------------|
| Maximum Force        | 0.000017 | 0.000450  | YES        |
| RMS Force            | 0.000003 | 0.000300  | YES        |
| Maximum Displacement | 0.002665 | 0.001800  | NO         |
| RMS Displacement     | 0.000692 | 0.001200  | YES        |

Predicted change in Energy = -3.061451D-08

Values come from Link 1:

HF = -1712.0754828 hartrees (-1074344.48621183 kcal/mol)

Imaginary Frequencies: none found

Zero-point correction = 0.390001 (Hartree/Particle)

Temperature 298.150 Kelvin. Pressure 1.00000 Atm.

Sum of electronic and thermal Free Energies =

-1711.742319 hartrees (-1074135.42259569 kcal/mol)

Comments:

Coordinates (from last standard orientation):

```
-----  
Center      Atomic      Coordinates (Angstroms)  
Number      Number      X          Y          Z  
-----  
  1         6         -0.154183  1.654713  1.284790  
  2         6         -1.206319 -0.366778  0.284203  
  3         6         -1.038176  1.161296  0.170868  
  4         6         -0.411956  1.530950 -1.212825
```

|    |    |           |           |           |
|----|----|-----------|-----------|-----------|
| 5  | 6  | -0.337104 | -1.164872 | -0.727313 |
| 6  | 6  | 0.938948  | 0.851693  | -1.345586 |
| 7  | 6  | 0.950168  | -0.458169 | -1.065573 |
| 8  | 6  | -0.388476 | 3.033571  | -1.507435 |
| 9  | 6  | 4.242242  | -2.865825 | -0.407324 |
| 10 | 6  | 1.955515  | -2.244303 | 1.582018  |
| 11 | 6  | 3.894524  | -0.025527 | 0.772197  |
| 12 | 6  | 2.171050  | 1.628411  | -1.716439 |
| 13 | 6  | -2.668149 | -0.748346 | 0.114379  |
| 14 | 6  | -4.157389 | -2.569606 | -0.030194 |
| 15 | 6  | -4.077929 | -4.078198 | -0.057167 |
| 16 | 17 | -0.507604 | 3.385832  | 1.775369  |
| 17 | 1  | -0.926280 | -0.689798 | 1.293380  |
| 18 | 1  | -2.014393 | 1.644019  | 0.253315  |
| 19 | 1  | -1.125896 | 1.098392  | -1.930569 |
| 20 | 1  | -0.132886 | -2.160942 | -0.330634 |
| 21 | 1  | -0.913003 | -1.304686 | -1.652668 |
| 22 | 1  | 0.352713  | 3.555023  | -0.888705 |
| 23 | 1  | -0.091092 | 3.173181  | -2.551224 |
| 24 | 1  | 4.830785  | -2.488525 | -1.250793 |
| 25 | 1  | 4.940535  | -3.146944 | 0.389188  |
| 26 | 1  | 3.724387  | -3.773486 | -0.735777 |
| 27 | 1  | 1.451631  | -3.177051 | 1.306548  |
| 28 | 1  | 2.571057  | -2.447089 | 2.466849  |
| 29 | 1  | 1.196811  | -1.509015 | 1.874054  |
| 30 | 1  | 4.473085  | -0.233234 | 1.680761  |
| 31 | 1  | 4.585965  | 0.366337  | 0.018716  |
| 32 | 1  | 3.168801  | 0.758445  | 1.016270  |
| 33 | 1  | -1.800207 | 3.852636  | -0.444575 |
| 34 | 1  | 2.027145  | 2.196038  | -2.643174 |
| 35 | 1  | 2.447284  | 2.349884  | -0.936424 |

|    |    |           |           |           |
|----|----|-----------|-----------|-----------|
| 36 | 1  | 3.014369  | 0.950356  | -1.863961 |
| 37 | 1  | -4.566480 | -2.164464 | -0.959821 |
| 38 | 1  | -4.768758 | -2.205407 | 0.800728  |
| 39 | 1  | -3.657501 | -4.462744 | 0.876141  |
| 40 | 1  | -5.080698 | -4.495892 | -0.182771 |
| 41 | 1  | -3.455159 | -4.417640 | -0.889609 |
| 42 | 8  | 0.713842  | 1.084506  | 1.853374  |
| 43 | 8  | 2.070541  | -1.240047 | -1.154997 |
| 44 | 8  | -1.670391 | 3.617610  | -1.376130 |
| 45 | 8  | -2.813512 | -2.074625 | 0.136142  |
| 46 | 8  | -3.589837 | 0.023334  | -0.021830 |
| 47 | 14 | 3.029666  | -1.581915 | 0.198529  |

---

**Exo cycloadduct (background reaction):**

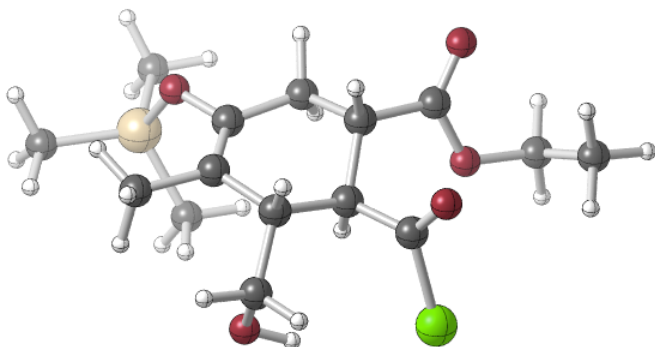

Charge = 0 Multiplicity = 1

mem = 57GB

Link 0: opt freq=noraman M062X/6-31g(d) scrf=(smd,solvent=dichloromethane)

Job cpu time: 0 days 4 hours 44 minutes 50.9 seconds.

File lengths (MBytes): RWF= 397 Int= 0 D2E= 0 Chk= 17 Scr= 1

Normal termination of Gaussian 09 at Wed Oct 9 23:02:15 2013.

| Item                 | Value    | Threshold | Converged? |
|----------------------|----------|-----------|------------|
| Maximum Force        | 0.000027 | 0.000450  | YES        |
| RMS Force            | 0.000005 | 0.000300  | YES        |
| Maximum Displacement | 0.001382 | 0.001800  | YES        |
| RMS Displacement     | 0.000303 | 0.001200  | YES        |

Predicted change in Energy = -3.280765D-08

Optimization completed.

-- Stationary point found.

Link 1: N Geom=AllCheck Guess=TCheck SCRF=Check GenChk RM062X/6-31G(d) Freq

Job cpu time: 0 days 3 hours 14 minutes 57.0 seconds.

File lengths (MBytes): RWF= 1053 Int= 0 D2E= 0 Chk= 24 Scr= 1

Normal termination of Gaussian 09 at Wed Oct 9 23:14:42 2013.

| Item | Value | Threshold | Converged? |
|------|-------|-----------|------------|
|------|-------|-----------|------------|

|                      |          |          |     |
|----------------------|----------|----------|-----|
| Maximum Force        | 0.000027 | 0.000450 | YES |
| RMS Force            | 0.000005 | 0.000300 | YES |
| Maximum Displacement | 0.004768 | 0.001800 | NO  |
| RMS Displacement     | 0.000868 | 0.001200 | YES |

Predicted change in Energy = -8.778539D-08

Values come from Link 1:

HF = -1712.084226 hartrees (-1074349.97265726 kcal/mol)

Imaginary Frequencies: none found

Zero-point correction = 0.390590 (Hartree/Particle)

Temperature 298.150 Kelvin. Pressure 1.00000 Atm.

Sum of electronic and thermal Free Energies =

-1711.750175 hartrees (-1074140.35231425 kcal/mol)

Comments:

Coordinates (from last standard orientation):

| -----  |        |                         |           |           |
|--------|--------|-------------------------|-----------|-----------|
| Center | Atomic | Coordinates (Angstroms) |           |           |
| Number | Number | X                       | Y         | Z         |
| -----  |        |                         |           |           |
| 1      | 6      | 2.458361                | 1.137674  | -0.327573 |
| 2      | 6      | 0.956213                | -0.714155 | -1.023078 |
| 3      | 6      | 1.038896                | 0.628876  | -0.290363 |
| 4      | 6      | 0.081069                | 1.639775  | -0.960971 |
| 5      | 6      | -0.428060               | -1.315693 | -0.762797 |
| 6      | 6      | -1.307717               | 1.030291  | -1.070545 |
| 7      | 6      | -1.510775               | -0.285126 | -0.917866 |
| 8      | 6      | 0.042787                | 2.968180  | -0.190641 |
| 9      | 6      | -2.759394               | -0.115094 | 1.900776  |

|    |    |           |           |           |
|----|----|-----------|-----------|-----------|
| 10 | 6  | -4.154620 | -2.645268 | 0.810024  |
| 11 | 6  | -5.294975 | 0.121478  | 0.138509  |
| 12 | 6  | -2.456600 | 1.970451  | -1.314018 |
| 13 | 6  | 2.019638  | -1.712619 | -0.611649 |
| 14 | 6  | 3.623292  | -2.263366 | 1.045691  |
| 15 | 6  | 4.931117  | -1.861185 | 0.395701  |
| 16 | 17 | 2.981276  | 1.956372  | 1.215116  |
| 17 | 1  | 1.083031  | -0.549144 | -2.098364 |
| 18 | 1  | 0.736874  | 0.492146  | 0.752601  |
| 19 | 1  | 0.471026  | 1.871758  | -1.964506 |
| 20 | 1  | -0.471567 | -1.744199 | 0.249886  |
| 21 | 1  | -0.618055 | -2.136592 | -1.462855 |
| 22 | 1  | 1.036196  | 3.436290  | -0.201538 |
| 23 | 1  | -0.633114 | 3.661676  | -0.696579 |
| 24 | 1  | -3.393645 | -0.045222 | 2.792612  |
| 25 | 1  | -1.895139 | -0.737611 | 2.161559  |
| 26 | 1  | -2.387769 | 0.889764  | 1.668287  |
| 27 | 1  | -3.248011 | -3.237272 | 0.980076  |
| 28 | 1  | -4.790583 | -2.742931 | 1.697627  |
| 29 | 1  | -4.691549 | -3.089675 | -0.035482 |
| 30 | 1  | -6.030437 | -0.046381 | 0.934248  |
| 31 | 1  | -5.103618 | 1.198135  | 0.083477  |
| 32 | 1  | -5.752219 | -0.191607 | -0.807193 |
| 33 | 1  | 0.277966  | 2.495300  | 1.689644  |
| 34 | 1  | -3.342110 | 1.421831  | -1.641931 |
| 35 | 1  | -2.713827 | 2.538307  | -0.410005 |
| 36 | 1  | -2.202725 | 2.700096  | -2.092298 |
| 37 | 1  | 3.365649  | -3.303192 | 0.833575  |
| 38 | 1  | 3.645654  | -2.109367 | 2.125586  |
| 39 | 1  | 5.164139  | -0.815054 | 0.615215  |
| 40 | 1  | 5.741757  | -2.485191 | 0.783783  |

|    |    |           |           |           |
|----|----|-----------|-----------|-----------|
| 41 | 1  | 4.882019  | -1.993821 | -0.688556 |
| 42 | 8  | 3.221124  | 1.070365  | -1.230973 |
| 43 | 8  | -2.768338 | -0.833614 | -0.913111 |
| 44 | 8  | -0.444244 | 2.821705  | 1.130299  |
| 45 | 8  | 2.550630  | -1.416270 | 0.582227  |
| 46 | 8  | 2.319567  | -2.680943 | -1.268526 |
| 47 | 14 | -3.734068 | -0.852259 | 0.481974  |

---



**Endo cycloadduct (asymmetric reaction):**

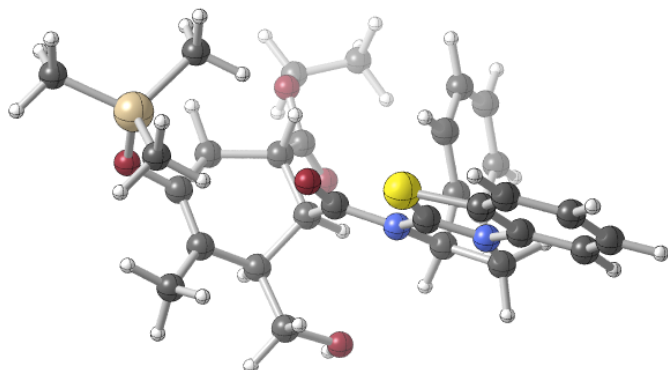

Charge = 1 Multiplicity = 1

mem = 57GB

Link 0: opt freq=noraman M062X/6-31g(d) scrf=(smd,solvent=dichloromethane)

Job cpu time: 3 days 23 hours 33 minutes 21.5 seconds.

File lengths (MBytes): RWF= 1103 Int= 0 D2E= 0 Chk= 40 Scr= 1

Normal termination of Gaussian 09 at Fri Oct 11 03:46:42 2013.

| Item                 | Value    | Threshold | Converged? |
|----------------------|----------|-----------|------------|
| Maximum Force        | 0.000017 | 0.000450  | YES        |
| RMS Force            | 0.000002 | 0.000300  | YES        |
| Maximum Displacement | 0.000690 | 0.001800  | YES        |
| RMS Displacement     | 0.000144 | 0.001200  | YES        |

Predicted change in Energy = -9.200397D-09

Optimization completed.

-- Stationary point found.

Link 1: N Geom=AllCheck Guess=TCheck SCRF=Check GenChk RM062X/6-31G(d) Freq

Job cpu time: 0 days 17 hours 45 minutes 55.8 seconds.

File lengths (MBytes): RWF= 4190 Int= 0 D2E= 0 Chk= 53 Scr= 1

Normal termination of Gaussian 09 at Fri Oct 11 04:53:46 2013.

| Item | Value | Threshold | Converged? |
|------|-------|-----------|------------|
|------|-------|-----------|------------|

|                      |          |          |     |
|----------------------|----------|----------|-----|
| Maximum Force        | 0.000017 | 0.000450 | YES |
| RMS Force            | 0.000002 | 0.000300 | YES |
| Maximum Displacement | 0.002979 | 0.001800 | NO  |
| RMS Displacement     | 0.000389 | 0.001200 | YES |

Predicted change in Energy = -2.034819D-08

Values come from Link 1:

HF = -2338.0058055 hartrees (-1467122.0230093 kcal/mol)

Imaginary Frequencies: none found

Zero-point correction = 0.633959 (Hartree/Particle)

Temperature 298.150 Kelvin. Pressure 1.00000 Atm.

Sum of electronic and thermal Free Energies =

-2337.442357 hartrees (-1466768.45344107 kcal/mol)

Comments:

Coordinates (from last standard orientation):

| -----  |        |                         |           |           |
|--------|--------|-------------------------|-----------|-----------|
| Center | Atomic | Coordinates (Angstroms) |           |           |
| Number | Number | X                       | Y         | Z         |
| -----  |        |                         |           |           |
| 1      | 6      | -6.028443               | -0.351319 | -0.080054 |
| 2      | 6      | -4.690019               | -0.723403 | -0.157688 |
| 3      | 6      | -4.288515               | -1.921822 | -0.761050 |
| 4      | 6      | -5.226731               | -2.788241 | -1.313068 |
| 5      | 6      | -6.565766               | -2.422412 | -1.236920 |
| 6      | 6      | -6.959804               | -1.222396 | -0.629220 |
| 7      | 6      | -2.425956               | -0.625474 | 0.121761  |
| 8      | 6      | -3.429889               | 1.213020  | 1.094257  |
| 9      | 6      | -1.882555               | 1.407563  | 1.092278  |

|    |   |           |           |           |
|----|---|-----------|-----------|-----------|
| 10 | 6 | -1.424117 | 2.527680  | 0.182443  |
| 11 | 6 | -1.435982 | 3.826881  | 0.693744  |
| 12 | 6 | -1.030764 | 2.307182  | -1.138233 |
| 13 | 6 | -1.080916 | 4.901352  | -0.115480 |
| 14 | 6 | -0.660789 | 3.384321  | -1.943236 |
| 15 | 6 | -0.695461 | 4.681438  | -1.437213 |
| 16 | 6 | -0.064188 | -0.349901 | 0.432696  |
| 17 | 6 | 1.030634  | 0.497998  | 1.028591  |
| 18 | 6 | 2.096054  | 0.814298  | -0.040044 |
| 19 | 6 | 1.637913  | -0.251262 | 2.253611  |
| 20 | 6 | 3.436451  | 0.059632  | 0.187534  |
| 21 | 6 | 0.564762  | -0.548277 | 3.302699  |
| 22 | 6 | 3.239903  | -1.310369 | 0.779558  |
| 23 | 6 | 5.014138  | -4.159729 | -1.619768 |
| 24 | 6 | 2.881116  | -2.059195 | -2.420930 |
| 25 | 6 | 2.109434  | -4.360309 | -0.574532 |
| 26 | 6 | 2.404383  | -1.485010 | 1.810480  |
| 27 | 6 | 2.422808  | 2.298080  | -0.050745 |
| 28 | 6 | 3.769418  | 3.914312  | -1.142624 |
| 29 | 6 | 2.788152  | 4.972579  | -1.598358 |
| 30 | 6 | 2.214542  | -2.806891 | 2.499354  |
| 31 | 1 | -6.319913 | 0.580264  | 0.393770  |
| 32 | 1 | -4.923165 | -3.717345 | -1.784164 |
| 33 | 1 | -7.317853 | -3.082011 | -1.656557 |
| 34 | 1 | -8.013222 | -0.966725 | -0.586014 |
| 35 | 1 | -3.950065 | 2.034689  | 0.600918  |
| 36 | 1 | -3.830181 | 1.055062  | 2.097785  |
| 37 | 1 | -1.724684 | 3.994879  | 1.728677  |
| 38 | 1 | -1.010108 | 1.302026  | -1.553162 |
| 39 | 1 | -1.096117 | 5.909059  | 0.288300  |
| 40 | 1 | -0.353297 | 3.206353  | -2.969441 |

|    |   |           |           |           |
|----|---|-----------|-----------|-----------|
| 41 | 1 | -0.412114 | 5.519379  | -2.066962 |
| 42 | 1 | -1.522654 | 1.561009  | 2.110883  |
| 43 | 1 | 0.614498  | 1.437153  | 1.393606  |
| 44 | 1 | 2.335159  | 0.477454  | 2.699376  |
| 45 | 1 | 3.982795  | -0.006162 | -0.755071 |
| 46 | 1 | 4.057026  | 0.651383  | 0.876117  |
| 47 | 1 | 1.726294  | 0.546877  | -1.034932 |
| 48 | 1 | -0.154449 | -1.287120 | 2.930642  |
| 49 | 1 | 1.030030  | -0.970942 | 4.201197  |
| 50 | 1 | 5.832012  | -3.481537 | -1.886159 |
| 51 | 1 | 5.371861  | -4.822824 | -0.824431 |
| 52 | 1 | 4.791916  | -4.779467 | -2.495951 |
| 53 | 1 | 1.998490  | -1.506515 | -2.077925 |
| 54 | 1 | 3.642734  | -1.340536 | -2.742409 |
| 55 | 1 | 2.580315  | -2.640742 | -3.300945 |
| 56 | 1 | 2.421812  | -5.077173 | 0.192118  |
| 57 | 1 | 1.257329  | -3.787692 | -0.191272 |
| 58 | 1 | 1.762966  | -4.930953 | -1.445163 |
| 59 | 1 | 4.599336  | 3.813112  | -1.844034 |
| 60 | 1 | 4.166262  | 4.137976  | -0.148802 |
| 61 | 1 | 3.311966  | 5.926733  | -1.713130 |
| 62 | 1 | 2.351706  | 4.701040  | -2.564440 |
| 63 | 1 | 1.987679  | 5.099019  | -0.866510 |
| 64 | 1 | 0.405028  | 1.251836  | 4.033577  |
| 65 | 1 | 1.193137  | -3.190472 | 2.382963  |
| 66 | 1 | 2.903446  | -3.547444 | 2.088112  |
| 67 | 1 | 2.409402  | -2.728755 | 3.575831  |
| 68 | 8 | 0.109793  | -1.390329 | -0.170740 |
| 69 | 8 | 4.017715  | -2.310585 | 0.257228  |
| 70 | 8 | 2.130780  | 3.085246  | 0.820760  |
| 71 | 8 | 3.172643  | 2.600597  | -1.114210 |

|    |    |           |           |           |
|----|----|-----------|-----------|-----------|
| 72 | 8  | -0.196944 | 0.603787  | 3.630219  |
| 73 | 7  | -3.584223 | -0.024649 | 0.319241  |
| 74 | 7  | -1.390714 | 0.079285  | 0.623290  |
| 75 | 16 | -2.528362 | -2.123607 | -0.704677 |
| 76 | 14 | 3.498730  | -3.212665 | -1.079601 |

---

**Exo cycloadduct (asymmetric reaction):**

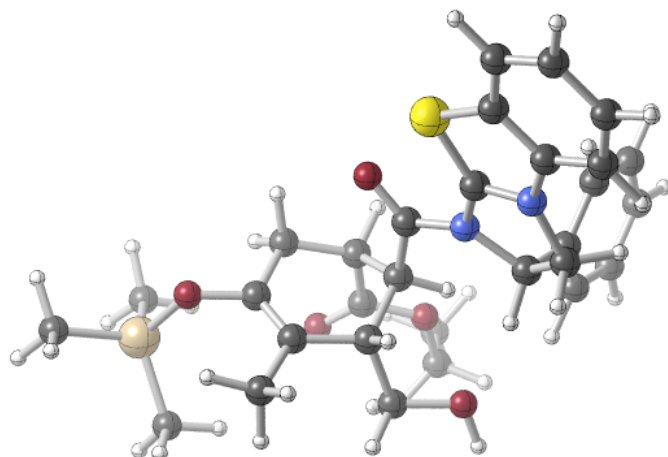

Charge = 1 Multiplicity = 1

mem = 57GB

Link 0: opt freq=norman M062X/6-31g(d) scrf=(smd,solvent=dichloromethane)

Job cpu time: 1 days 0 hours 46 minutes 21.8 seconds.

File lengths (MBytes): RWF= 1059 Int= 0 D2E= 0 Chk= 39 Scr= 1

Normal termination of Gaussian 09 at Wed Oct 9 03:00:00 2013.

| Item                 | Value    | Threshold | Converged? |
|----------------------|----------|-----------|------------|
| Maximum Force        | 0.000003 | 0.000450  | YES        |
| RMS Force            | 0.000001 | 0.000300  | YES        |
| Maximum Displacement | 0.000175 | 0.001800  | YES        |
| RMS Displacement     | 0.000032 | 0.001200  | YES        |

Predicted change in Energy = -5.731885D-10

Optimization completed.

-- Stationary point found.

Link 1: N Geom=AllCheck Guess=TCheck SCRF=Check GenChk RM062X/6-31G(d) Freq

Job cpu time: 0 days 16 hours 35 minutes 4.4 seconds.

File lengths (MBytes): RWF= 4176 Int= 0 D2E= 0 Chk= 52 Scr= 1

Normal termination of Gaussian 09 at Wed Oct 9 04:02:37 2013.

| Item                 | Value    | Threshold | Converged? |
|----------------------|----------|-----------|------------|
| Maximum Force        | 0.000003 | 0.000450  | YES        |
| RMS Force            | 0.000001 | 0.000300  | YES        |
| Maximum Displacement | 0.000596 | 0.001800  | YES        |
| RMS Displacement     | 0.000083 | 0.001200  | YES        |

Predicted change in Energy = -1.789859D-09

Optimization completed.

-- Stationary point found.

Values come from Link 1:

HF = -2338.0127968 hartrees (-1467126.41011997 kcal/mol)

Imaginary Frequencies: none found

Zero-point correction = 0.634114 (Hartree/Particle)

Temperature 298.150 Kelvin. Pressure 1.00000 Atm.

Sum of electronic and thermal Free Energies =

-2337.450449 hartrees (-1466773.53125199 kcal/mol)

Comments:

Coordinates (from last standard orientation):

| -----  |        |                         |           |           |
|--------|--------|-------------------------|-----------|-----------|
| Center | Atomic | Coordinates (Angstroms) |           |           |
| Number | Number | X                       | Y         | Z         |
| -----  |        |                         |           |           |
| 1      | 6      | -6.238075               | -1.215360 | 1.042573  |
| 2      | 6      | -5.015632               | -1.324817 | 0.388431  |
| 3      | 6      | -4.790404               | -2.282228 | -0.608914 |
| 4      | 6      | -5.797449               | -3.166676 | -0.981947 |
| 5      | 6      | -7.022732               | -3.060955 | -0.332668 |

|    |   |           |           |           |
|----|---|-----------|-----------|-----------|
| 6  | 6 | -7.239203 | -2.099585 | 0.664001  |
| 7  | 6 | -2.843683 | -0.884921 | -0.165348 |
| 8  | 6 | -3.528990 | 0.507834  | 1.545246  |
| 9  | 6 | -2.162247 | 1.010393  | 0.995328  |
| 10 | 6 | -2.252006 | 2.319043  | 0.236097  |
| 11 | 6 | -1.411895 | 3.377878  | 0.582246  |
| 12 | 6 | -3.176112 | 2.479539  | -0.802162 |
| 13 | 6 | -1.493935 | 4.589211  | -0.103988 |
| 14 | 6 | -3.255724 | 3.688047  | -1.485005 |
| 15 | 6 | -2.415133 | 4.745683  | -1.135380 |
| 16 | 6 | -0.534721 | -0.353330 | -0.561286 |
| 17 | 6 | 1.725021  | 0.616745  | -1.090935 |
| 18 | 6 | 0.626750  | 0.441953  | -0.028392 |
| 19 | 6 | 1.142896  | -0.252517 | 1.261410  |
| 20 | 6 | 2.447410  | -0.683725 | -1.418660 |
| 21 | 6 | 2.144201  | -1.357231 | 0.998302  |
| 22 | 6 | 2.737707  | -1.508535 | -0.195002 |
| 23 | 6 | 1.713201  | 0.766400  | 2.253088  |
| 24 | 6 | 5.984638  | -1.284501 | -1.619940 |
| 25 | 6 | 5.941045  | -4.112348 | -0.380596 |
| 26 | 6 | 5.695739  | -1.594137 | 1.405508  |
| 27 | 6 | 2.443222  | -2.267229 | 2.160997  |
| 28 | 6 | 2.715808  | 1.674837  | -0.617892 |
| 29 | 6 | 2.899473  | 3.857048  | 0.285274  |
| 30 | 6 | 3.463950  | 4.693780  | -0.843814 |
| 31 | 1 | -6.389535 | -0.466638 | 1.812976  |
| 32 | 1 | -5.634858 | -3.912878 | -1.752522 |
| 33 | 1 | -7.825819 | -3.736902 | -0.606204 |
| 34 | 1 | -8.206988 | -2.043159 | 1.150864  |
| 35 | 1 | -4.291008 | 1.288464  | 1.531790  |
| 36 | 1 | -3.446490 | 0.074738  | 2.544217  |



|    |   |           |           |           |
|----|---|-----------|-----------|-----------|
| 37 | 1 | -0.683262 | 3.241950  | 1.377820  |
| 38 | 1 | -3.841899 | 1.664380  | -1.081019 |
| 39 | 1 | -0.836645 | 5.409257  | 0.169177  |
| 40 | 1 | -3.976432 | 3.806551  | -2.288058 |
| 41 | 1 | -2.480087 | 5.688848  | -1.669350 |
| 42 | 1 | -1.425293 | 1.085848  | 1.798588  |
| 43 | 1 | 1.261210  | 1.027764  | -1.996362 |
| 44 | 1 | 0.256970  | 1.431565  | 0.248372  |
| 45 | 1 | 0.276809  | -0.699801 | 1.774408  |
| 46 | 1 | 3.389290  | -0.453990 | -1.924780 |
| 47 | 1 | 1.847173  | -1.283206 | -2.109389 |
| 48 | 1 | 2.003552  | 0.236586  | 3.168797  |
| 49 | 1 | 2.615958  | 1.242284  | 1.846123  |
| 50 | 1 | 7.081044  | -1.287636 | -1.580625 |
| 51 | 1 | 5.686955  | -1.644018 | -2.611282 |
| 52 | 1 | 5.650776  | -0.246148 | -1.514293 |
| 53 | 1 | 5.493086  | -4.753413 | 0.386754  |
| 54 | 1 | 5.716088  | -4.549621 | -1.359543 |
| 55 | 1 | 7.028316  | -4.135652 | -0.244992 |
| 56 | 1 | 6.771920  | -1.390950 | 1.466516  |
| 57 | 1 | 5.174960  | -0.637902 | 1.532947  |
| 58 | 1 | 5.431035  | -2.247878 | 2.242677  |
| 59 | 1 | 1.036201  | 2.328376  | 3.216256  |
| 60 | 1 | 3.102231  | -1.793750 | 2.899014  |
| 61 | 1 | 1.517015  | -2.535979 | 2.683995  |
| 62 | 1 | 2.926951  | -3.187496 | 1.824882  |
| 63 | 1 | 3.692980  | 3.430493  | 0.904610  |
| 64 | 1 | 2.223637  | 4.437104  | 0.916757  |
| 65 | 1 | 2.657218  | 5.087681  | -1.468631 |
| 66 | 1 | 4.026091  | 5.537039  | -0.431595 |
| 67 | 1 | 4.137767  | 4.099311  | -1.466224 |

|    |    |           |           |           |
|----|----|-----------|-----------|-----------|
| 68 | 8  | -0.496980 | -1.203335 | -1.425101 |
| 69 | 8  | 3.619775  | -2.532359 | -0.422265 |
| 70 | 8  | 0.705090  | 1.724631  | 2.532231  |
| 71 | 8  | 2.083136  | 2.785922  | -0.226467 |
| 72 | 8  | 3.918635  | 1.542970  | -0.597645 |
| 73 | 7  | -3.874246 | -0.555150 | 0.592352  |
| 74 | 7  | -1.767443 | -0.114299 | 0.077601  |
| 75 | 16 | -3.142385 | -2.174217 | -1.255814 |
| 76 | 14 | 5.296222  | -2.364429 | -0.253913 |

---

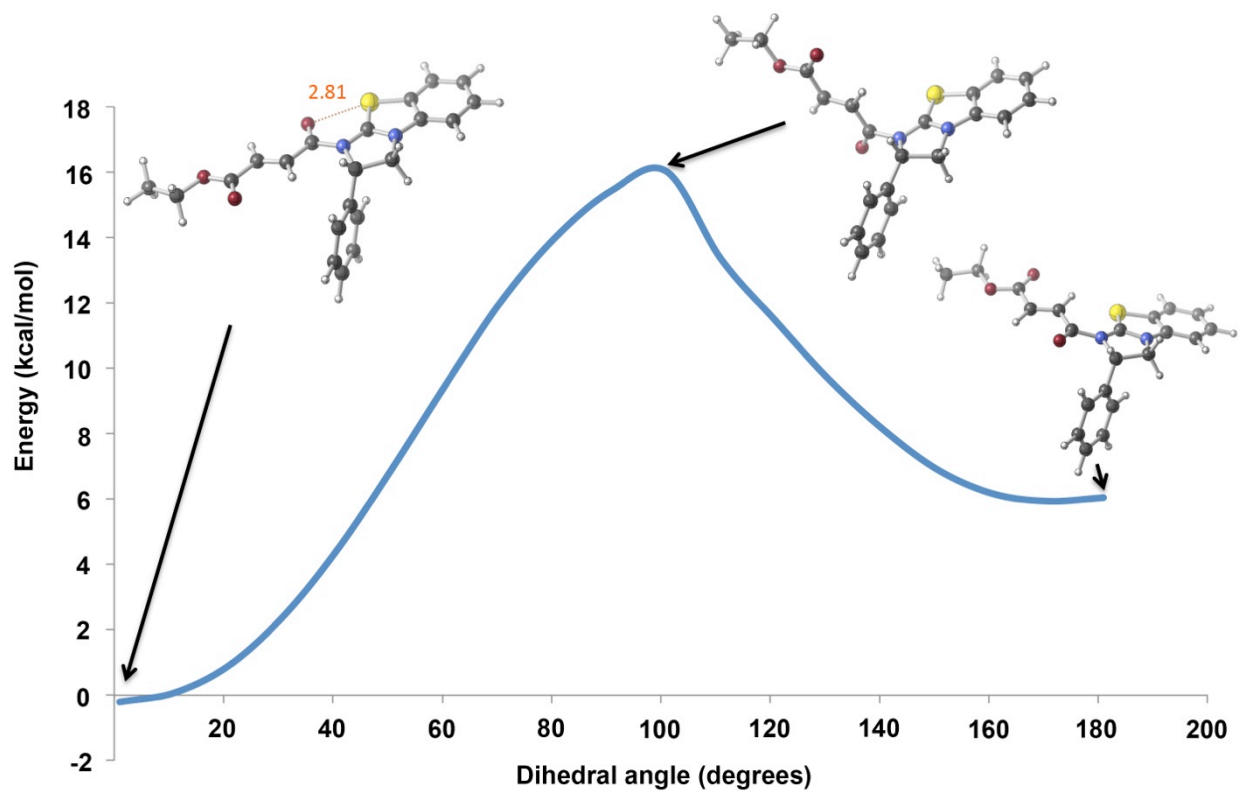

**Figure S4.** Dihedral angle scan of the O–C–N–C angle at 10-degree increments for 18 steps shows the lowest energy conformation where the sulfur atom is in close proximity to the oxygen atom. Selected distance is shown in Angstroms.

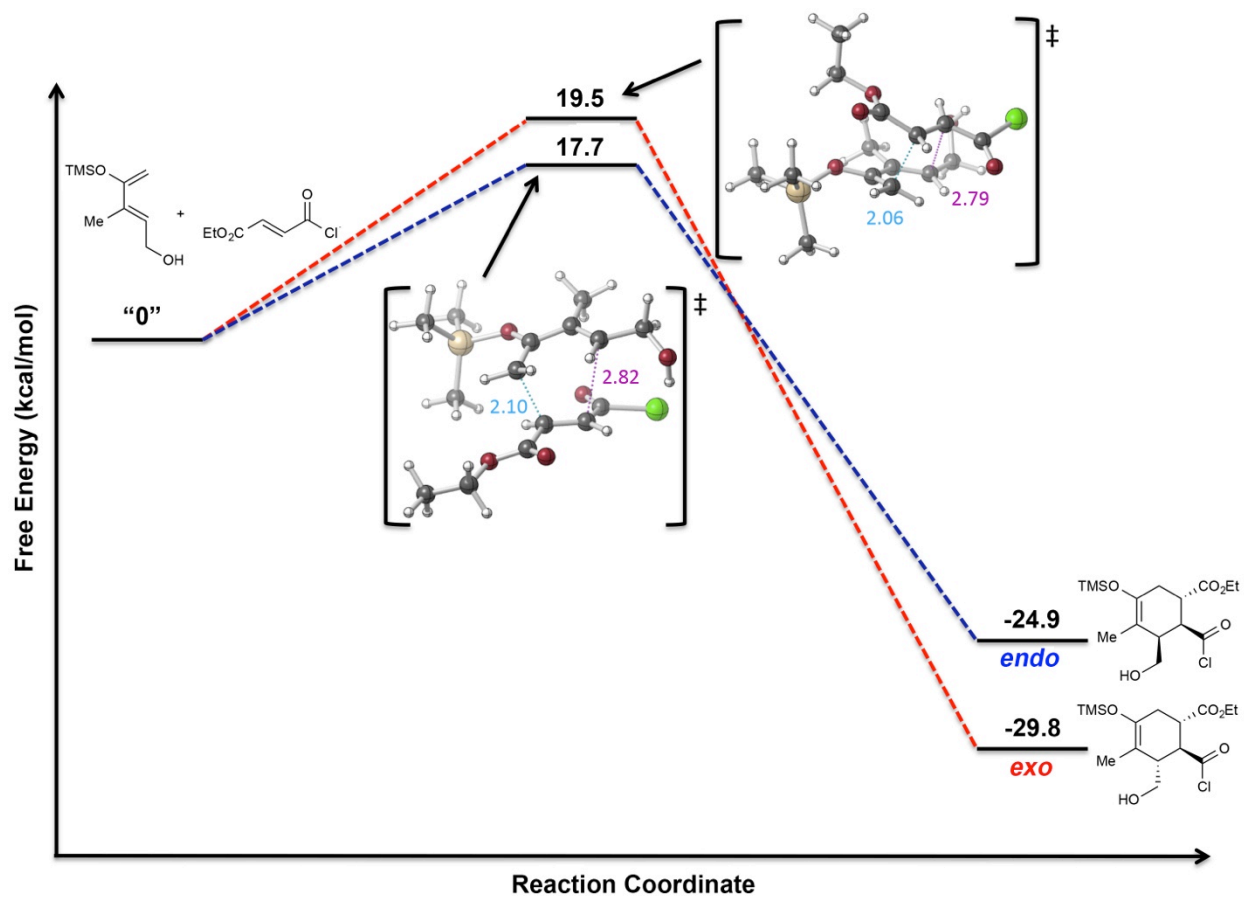

**Figure S5.** Reaction coordinate of the background reaction proceeding directly with ethyl fumaroyl chloride. Minima and transition state structures were optimized at the M06-2X/6-31G(d) level with an implicit solvent model (SMD(dichloromethane)). The TIPS group was truncated to a TMS group. Energies are Gibbs Free Energies in kcal/mol relative to the reactants. Selected distances are in Angstroms.

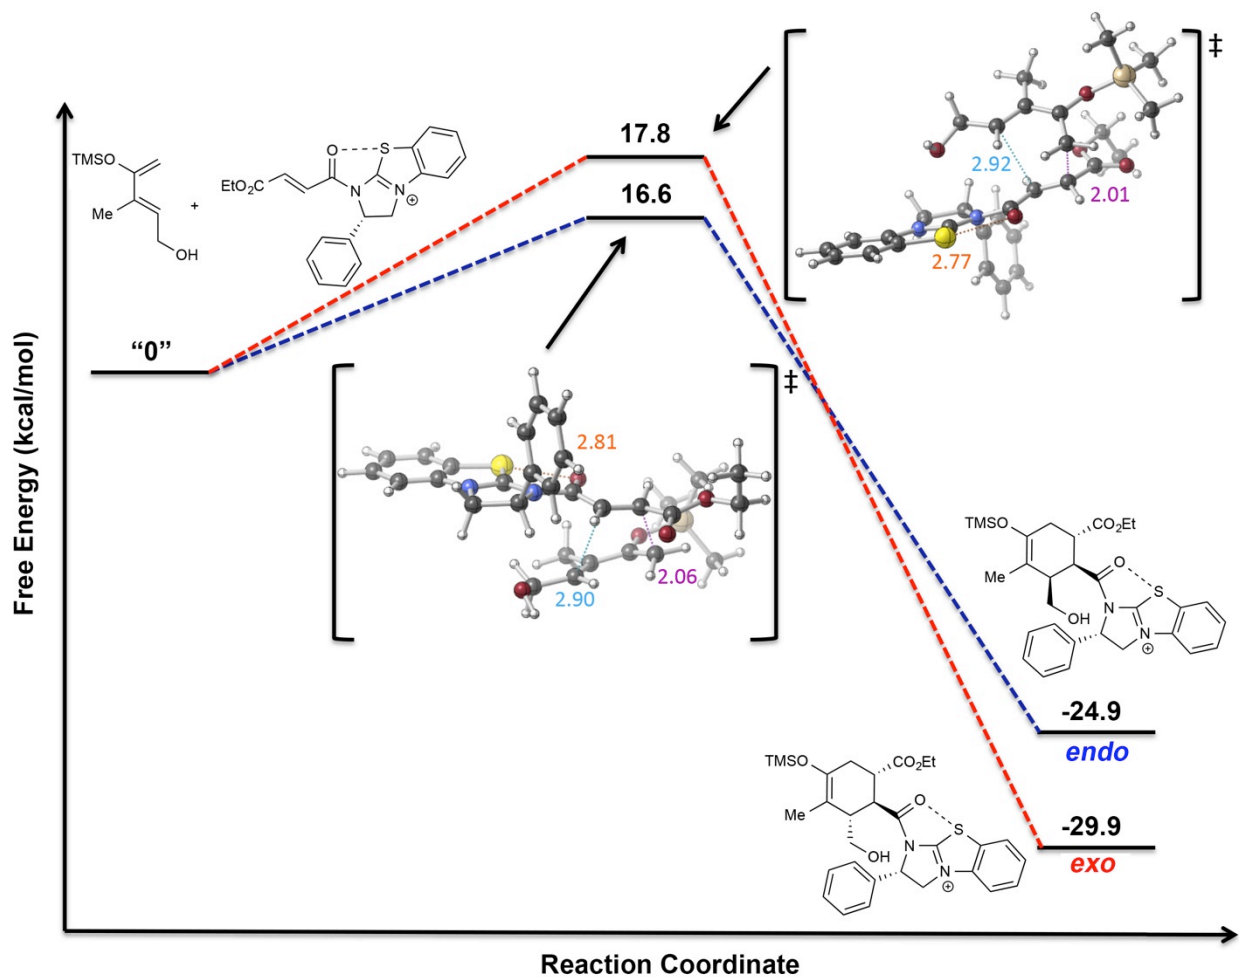

**Figure S6.** Reaction coordinates for the asymmetric Diels-Alder cycloaddition. Minima and transition state structures were optimized at the M06-2X/6-31G(d) level with an implicit solvent model (SMD(dichloromethane)). The TIPS group was truncated to a TMS group. Silyloxydiene and acylammonium cation energies were calculated for the reactants. Energies are Gibbs Free Energies in kcal/mol relative to the reactants. Selected distances are in Angstroms.

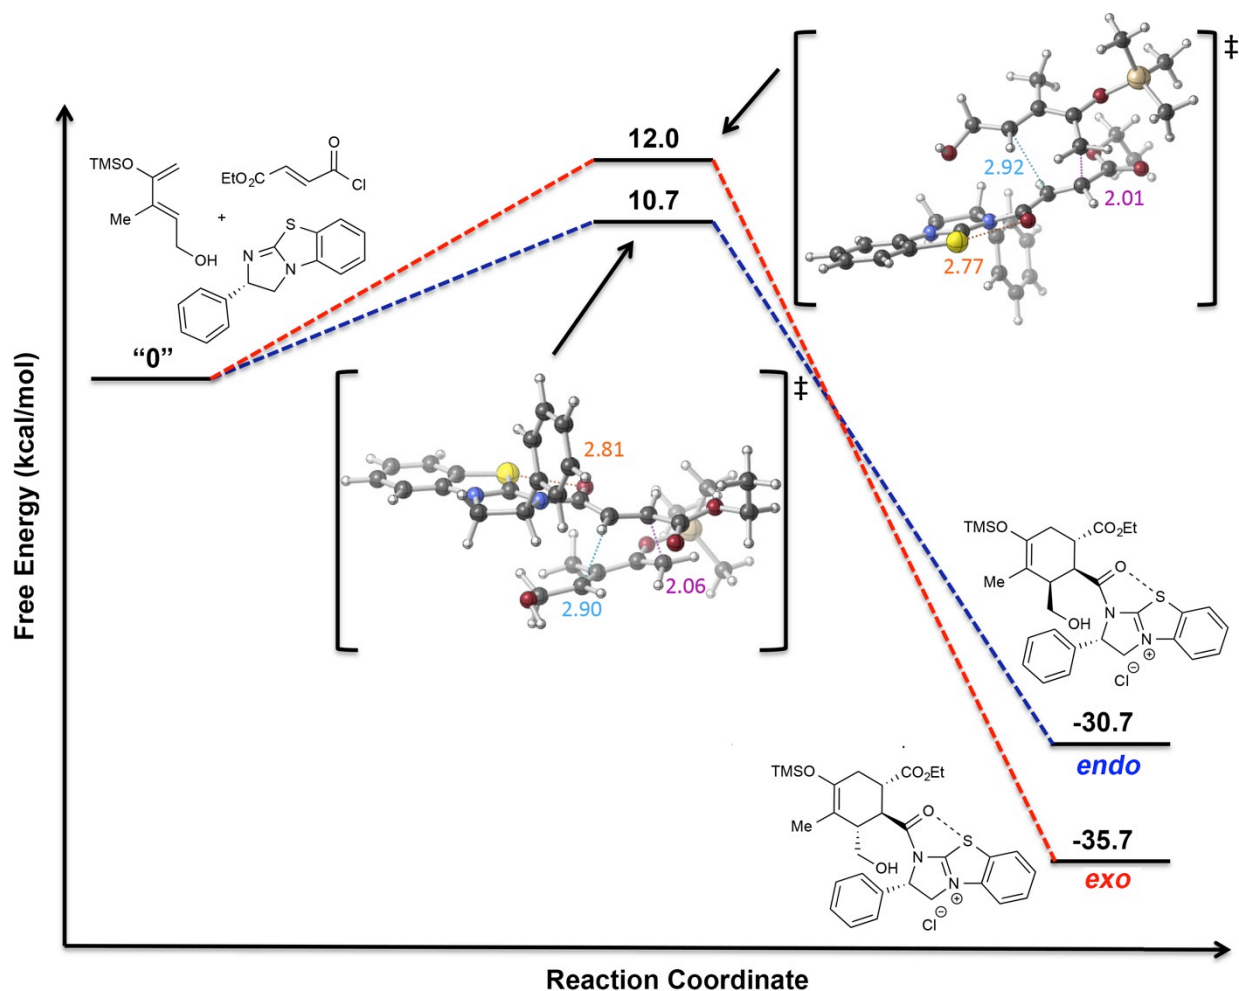

**Figure S7.** Reaction coordinates for the asymmetric Diels-Alder cycloaddition. Minima and transition state structures were optimized at the M06-2X/6-31G(d) level with an implicit solvent model (SMD(dichloromethane)). The TIPS group was truncated to a TMS group. Silyloxydiene, ethyl fumaroyl chloride and (S)-(-)-BTM energies were calculated for the reactants. Energies are Gibbs Free Energies in kcal/mol relative to the reactants. Selected distances are in Angstroms.

**Intrinsic Reaction Coordinate:** The following IRC was generated at the uM062X/6-31g(d) level with “guess=(mix,always)” keywords to assure that diradical processes were not missed and using the SMD(dichloromethane) continuum model. The IRC is for the *endo* Diels-Alder cycloadduct. This model has been truncated. The TIPS group was truncated to a TMS group, the ethyl ester moiety was removed from the acylammonium, and the alcohol tether was removed from the silyloxydiene. Note that there is a likely “hidden intermediate” in the area of the plateau.<sup>16</sup>

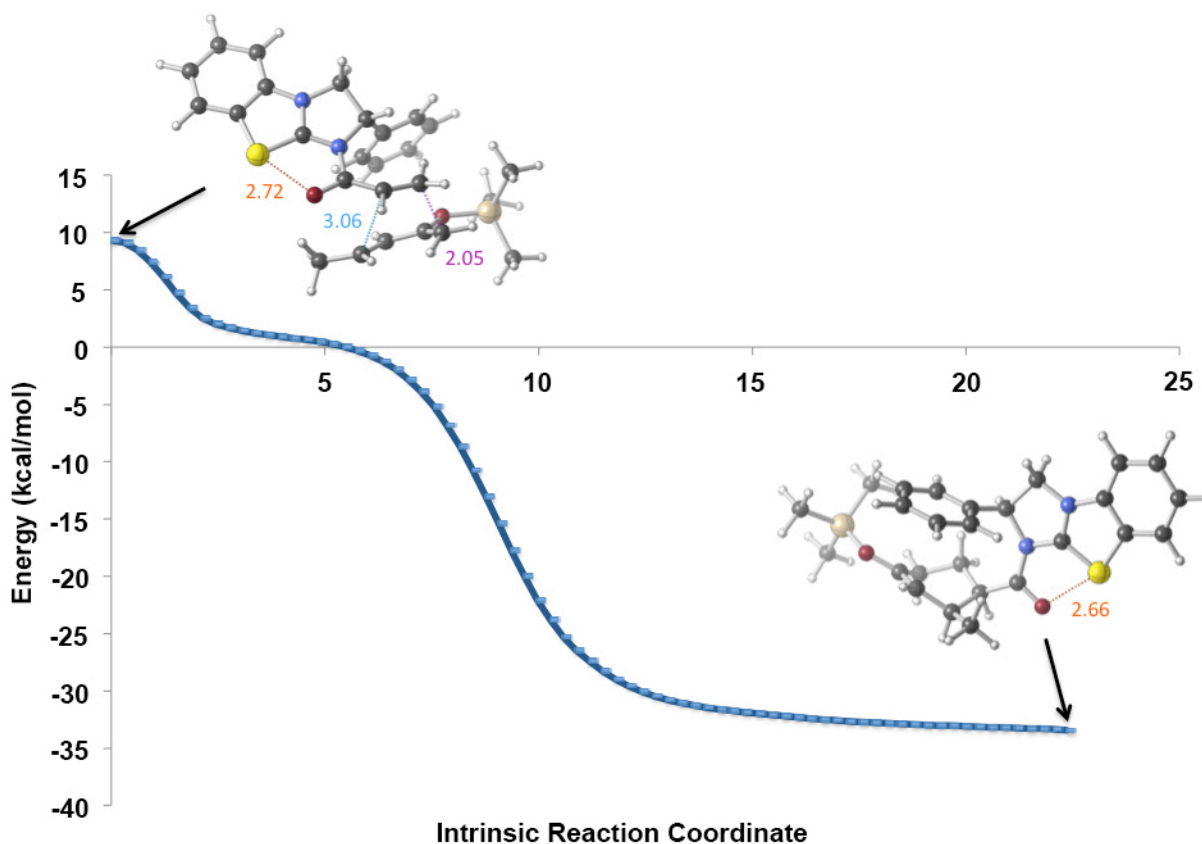

**Figure S8.** Total energy along IRC (*EndoTop*) generated at the uM062X/6-31g(d) level with an implicit solvent model (SMD(dichloromethane)) for the *endo* cycloadduct of the asymmetric Diels-Alder reaction. The TIPS group was truncated to a TMS group, the ethyl ester moiety was removed from the acylammonium, and the alcohol tether was removed from the silyloxydiene. Selected distances are in Angstroms.

**NBO Analysis:** All NBO calculations were done at the M06-2X/6-31G(d) level with the following keywords in the route card: pop(nbo6read) scf(tight) int(finegrid) iop(3/32=2). The keywords “E2PERT=0.1” and “STERIC=0.1” were used to compute all favorable (lone pair<sub>N</sub> ↔ S\*<sub>SC</sub>) and unfavorable (lone pair<sub>N</sub> ↔ lone pair<sub>S</sub>) interactions that were 0.1 kcal/mol or higher in energy.

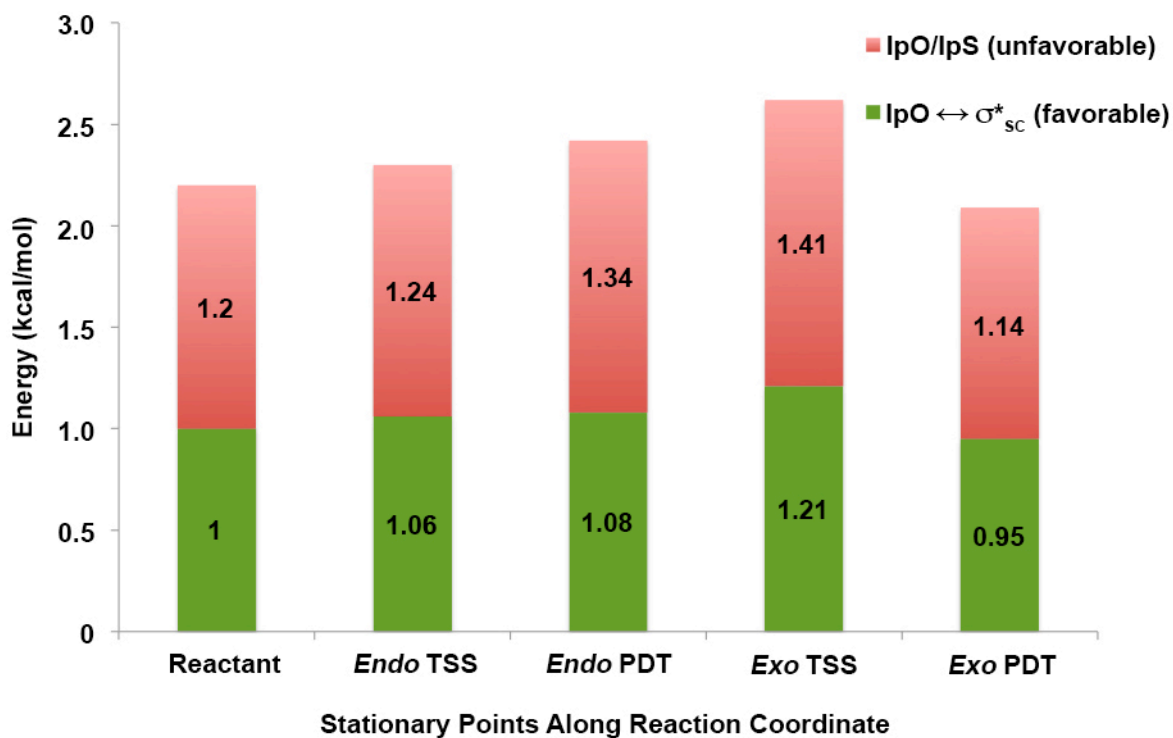

**Figure S9.** Natural bonding orbital (NBO) interactions generated at the M06-2X/6-31G(d) level. Favorable (lone pair<sub>N</sub> ↔ σ\*<sub>SC</sub>) and unfavorable (lone pair<sub>N</sub> ↔ lone pair<sub>S</sub>) interactions tracked along the reaction coordinate (reactant → TS → product).



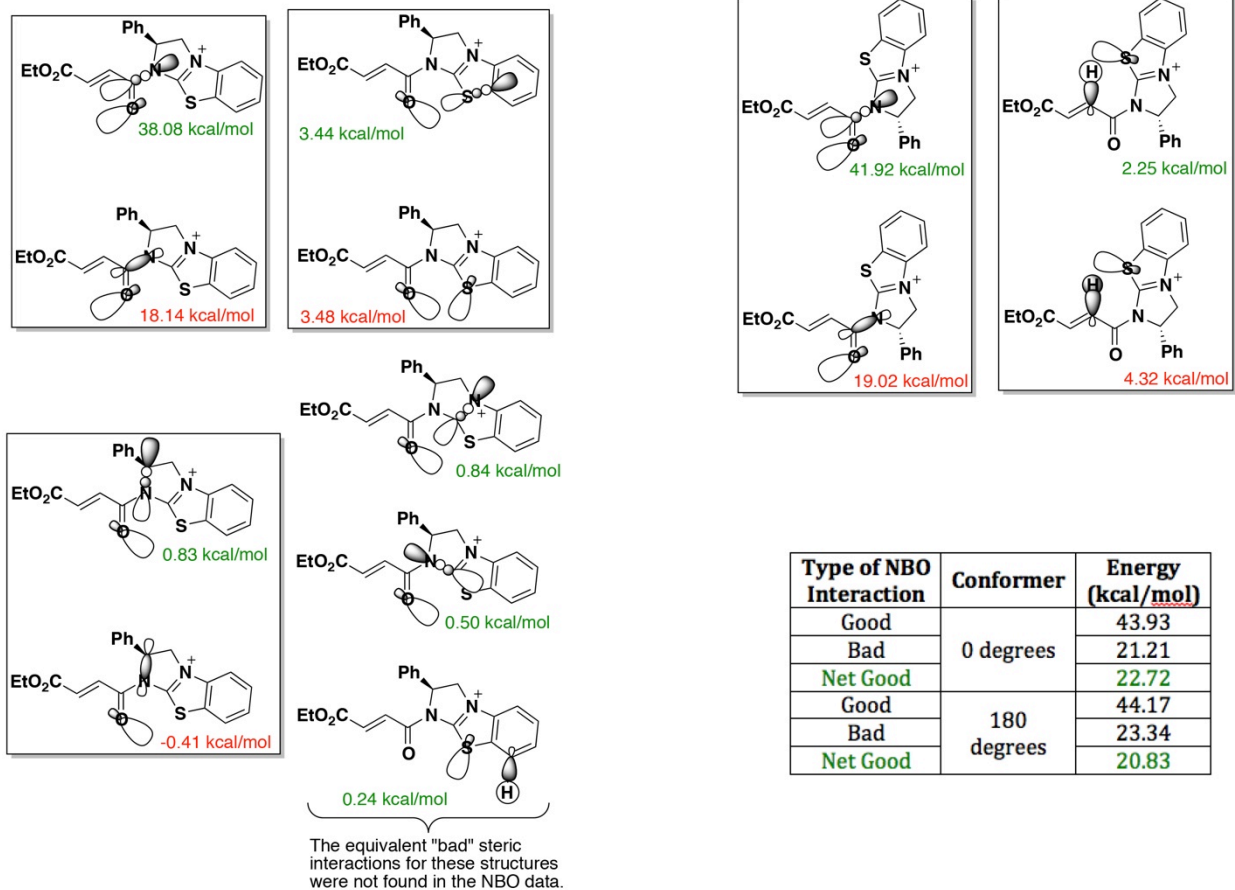

**Figure S10.** Relevant NBO interactions in the acylammonium cation. “Good” donor-acceptor interaction energies are shown in green, and “bad” filled-filled interaction energies are shown in red. The orbital interactions favor the 0-degree conformer (where the sulfur atom is in close proximity to the oxygen atom) by 1.89 kcal/mol.

**Spin density maps:** Spin density maps of the silyloxydiene **2c** and dienophiles (ethyl fumaroyl chloride **1a** and (*S*)-(-)-BTM catalyst-bound acylammonium cation) were generated using Spartan10. Optimizations were carried out using Spartan10, Truhlar M05-2X functional and 6-31+G(d) basis set.<sup>17</sup> The silyloxydiene **2c** was optimized as a radical cation and the dienophiles as radical anions.

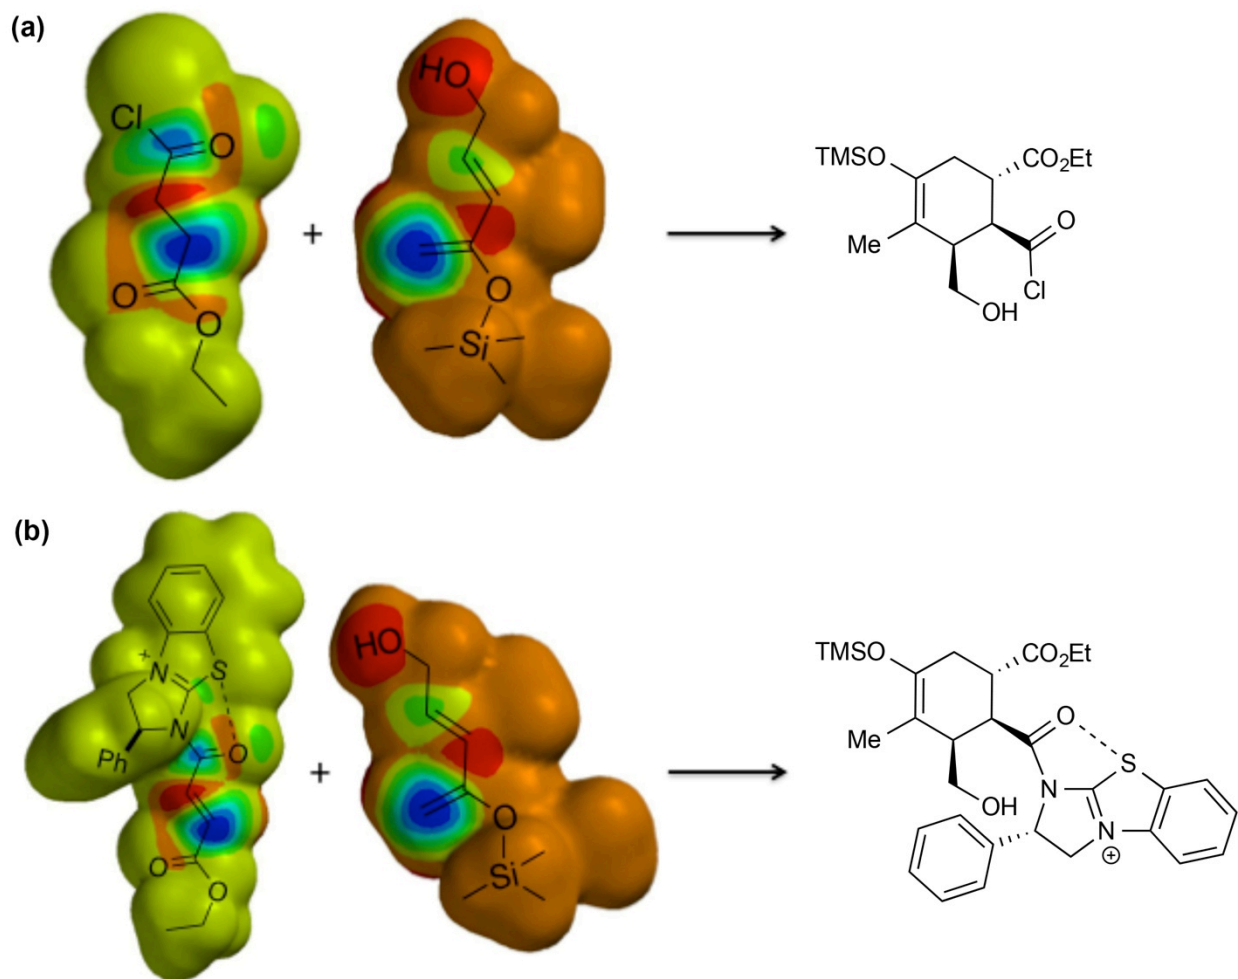

**Figure S11.** Spin density maps of the (a) background Diels-Alder cycloaddition and (b) asymmetric Diels-Alder cycloaddition leading to the preferred *endo* cycloadduct. The blue regions represent the reactive sites (highest spin density). The new bond occurs preferentially at these reactive sites. The above maps correctly predict the site of the first bond formations that occur in the Diels-Alder reaction.

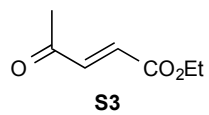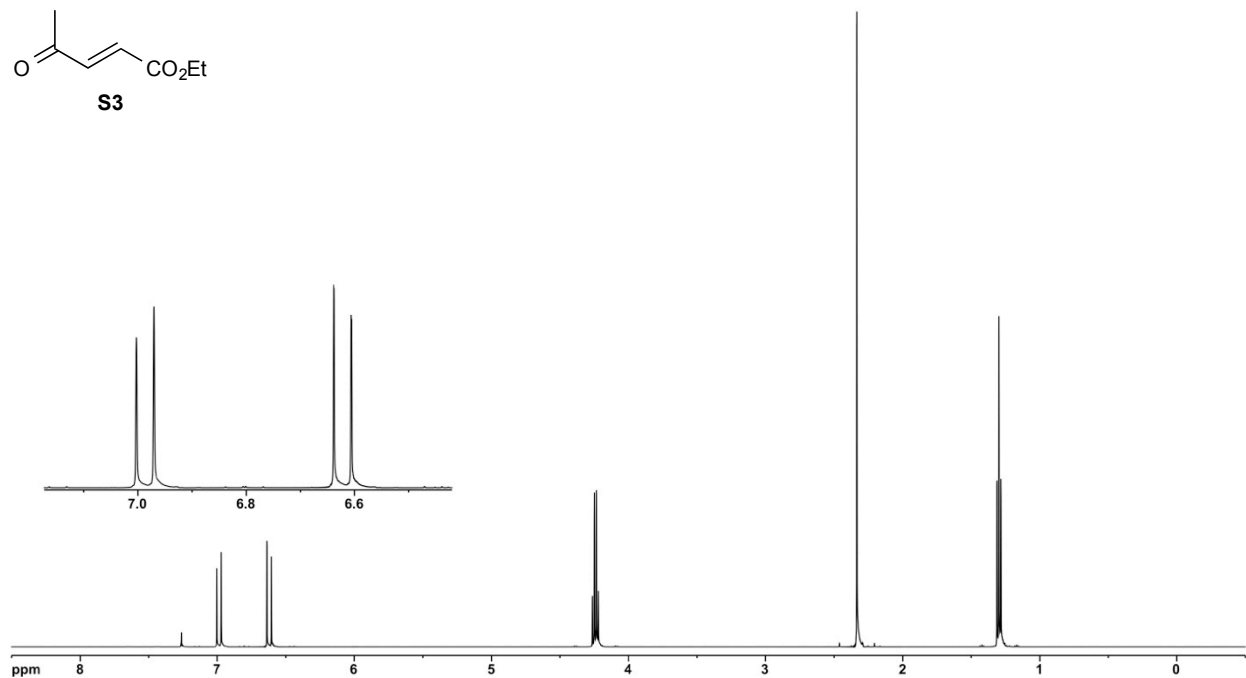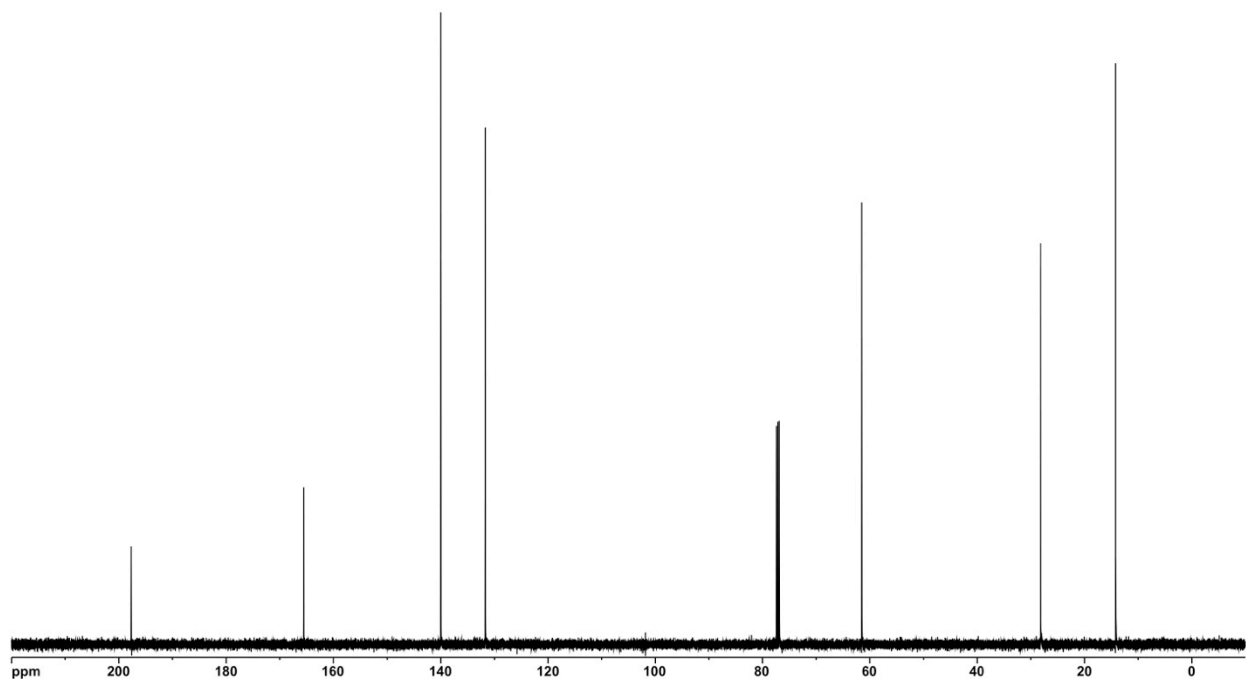

$^1\text{H}$  (500 MHz) and  $^{13}\text{C}$  NMR (125 MHz) spectra of ketoester **S3** in  $\text{CDCl}_3$



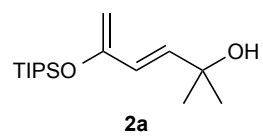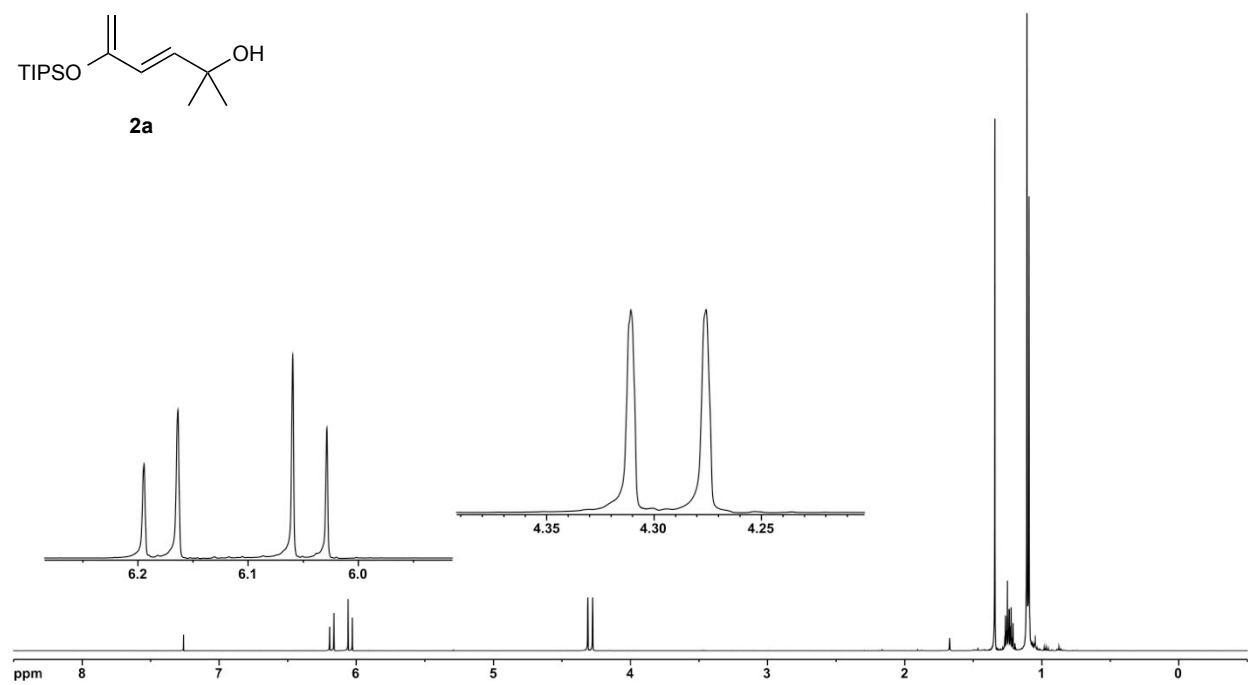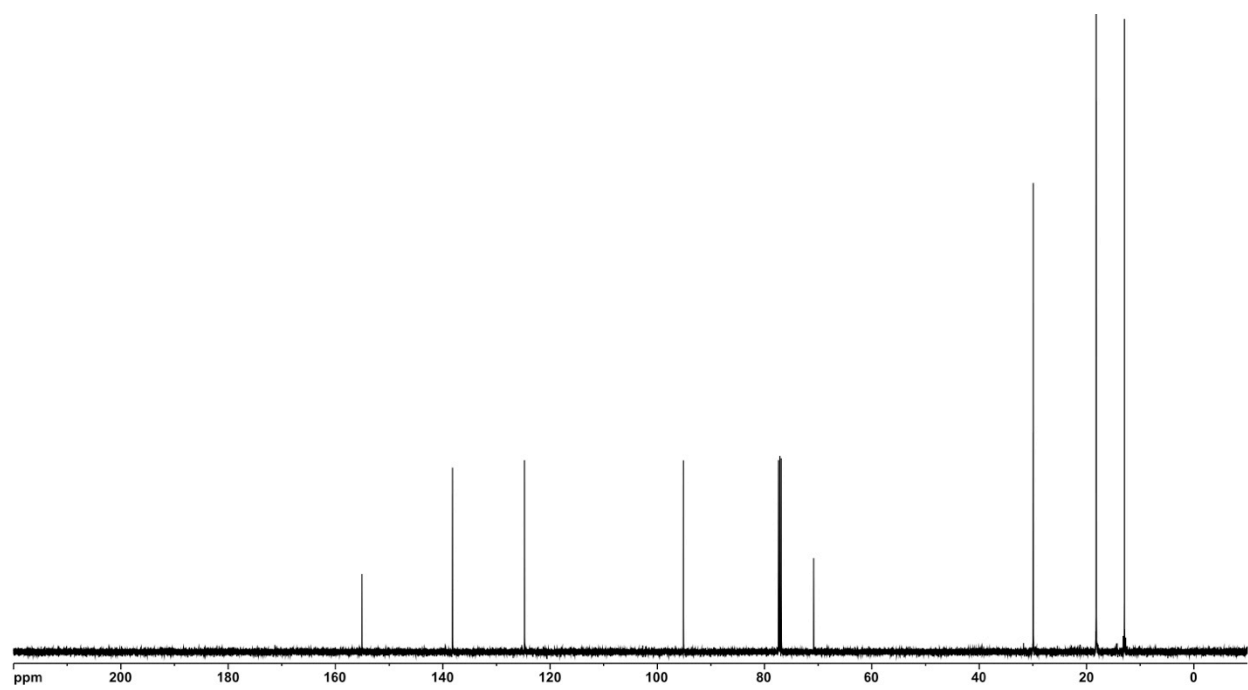

$^1\text{H}$  (500 MHz) and  $^{13}\text{C}$  NMR (125 MHz) spectra of silyloxydiene alcohol **2a** in  $\text{CDCl}_3$

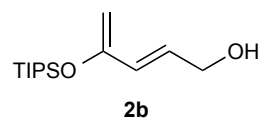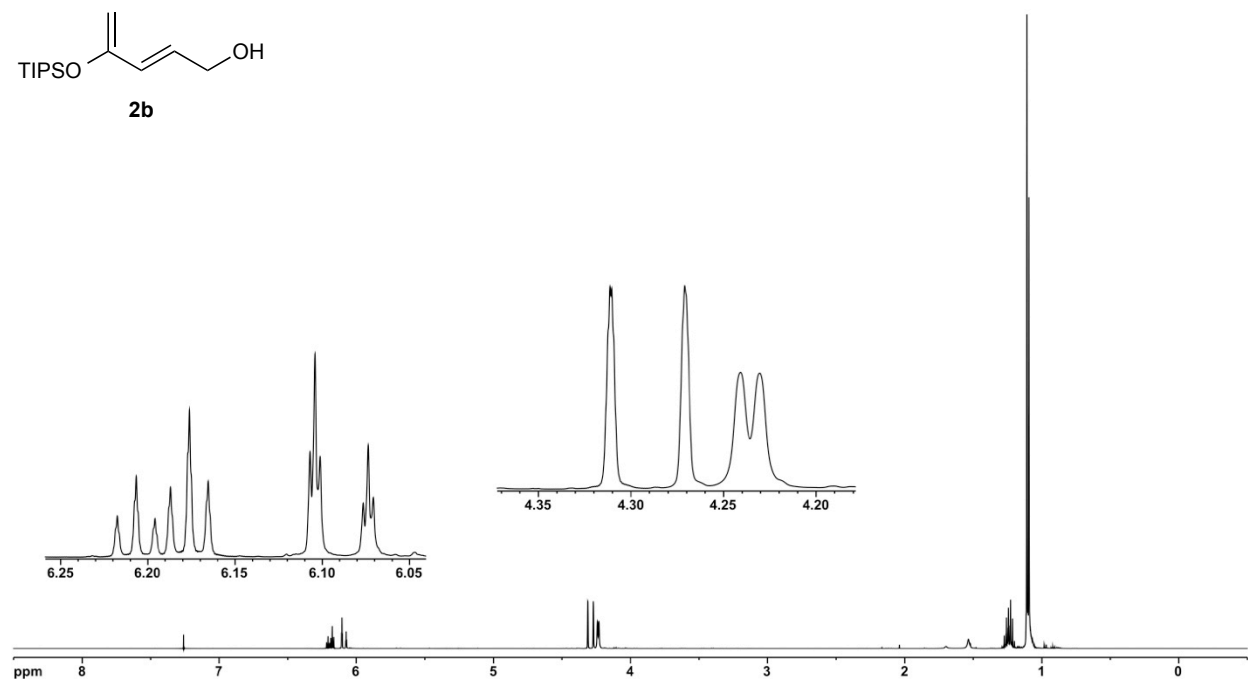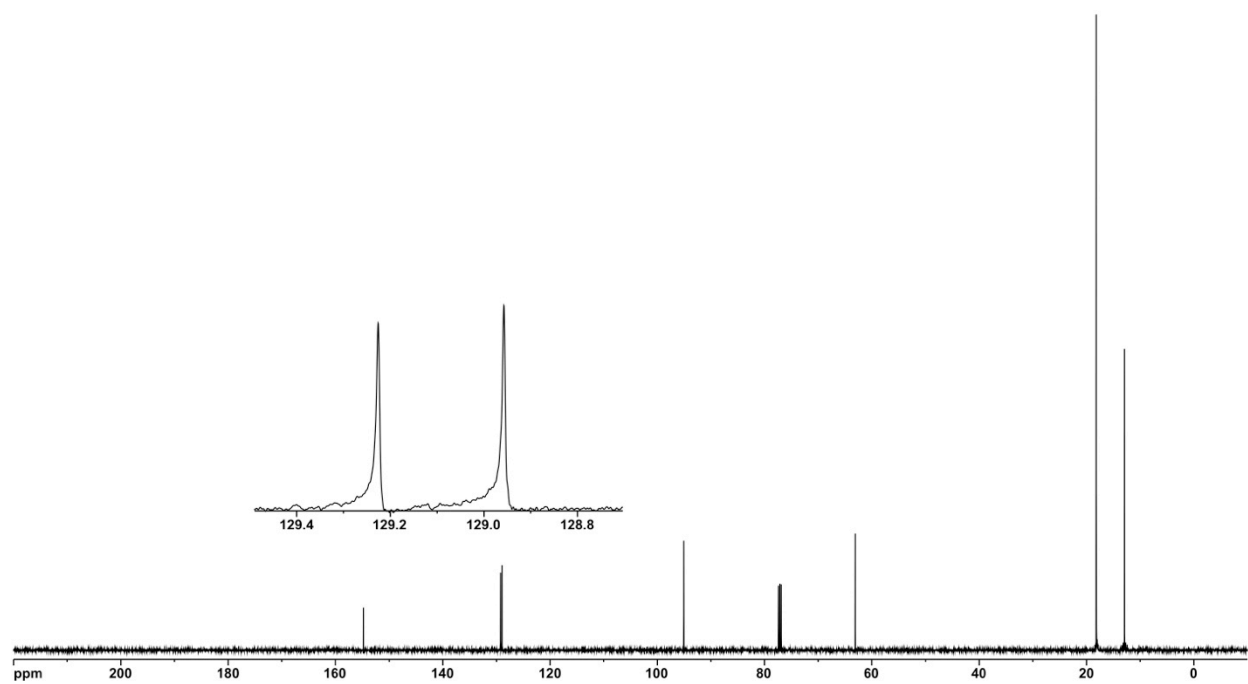

$^1\text{H}$  (500 MHz) and  $^{13}\text{C}$  NMR (125 MHz) spectra of silyloxydiene alcohol **2b** in  $\text{CDCl}_3$

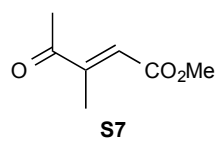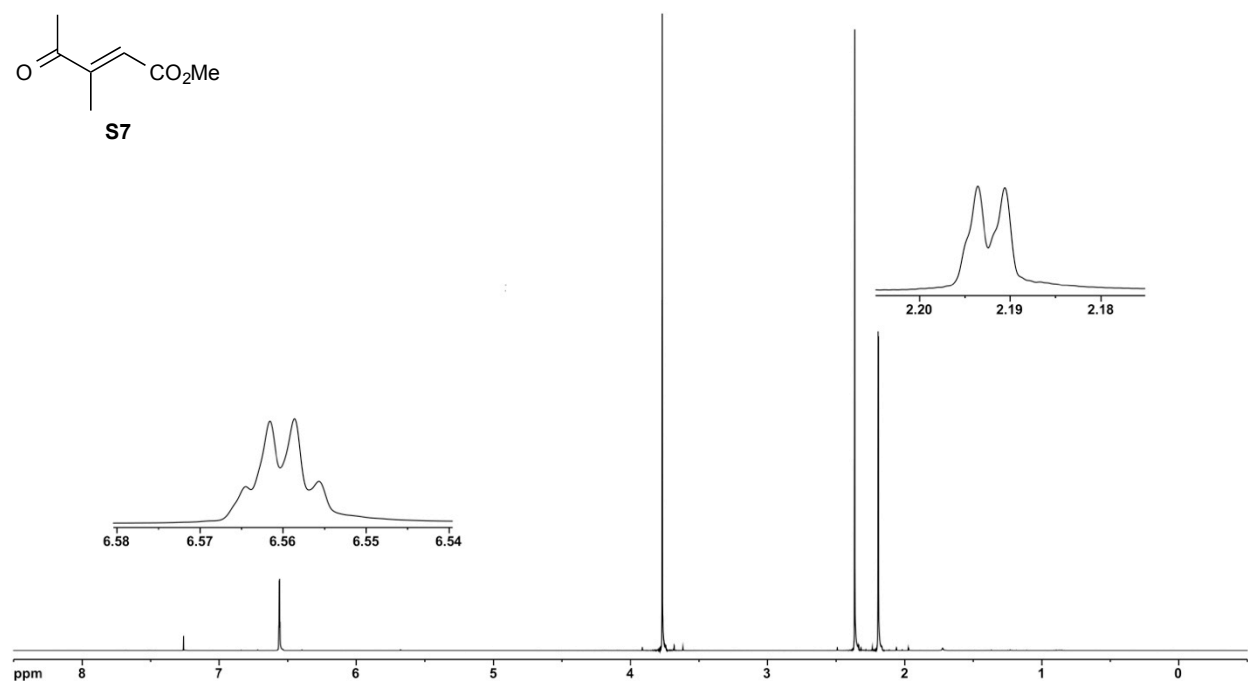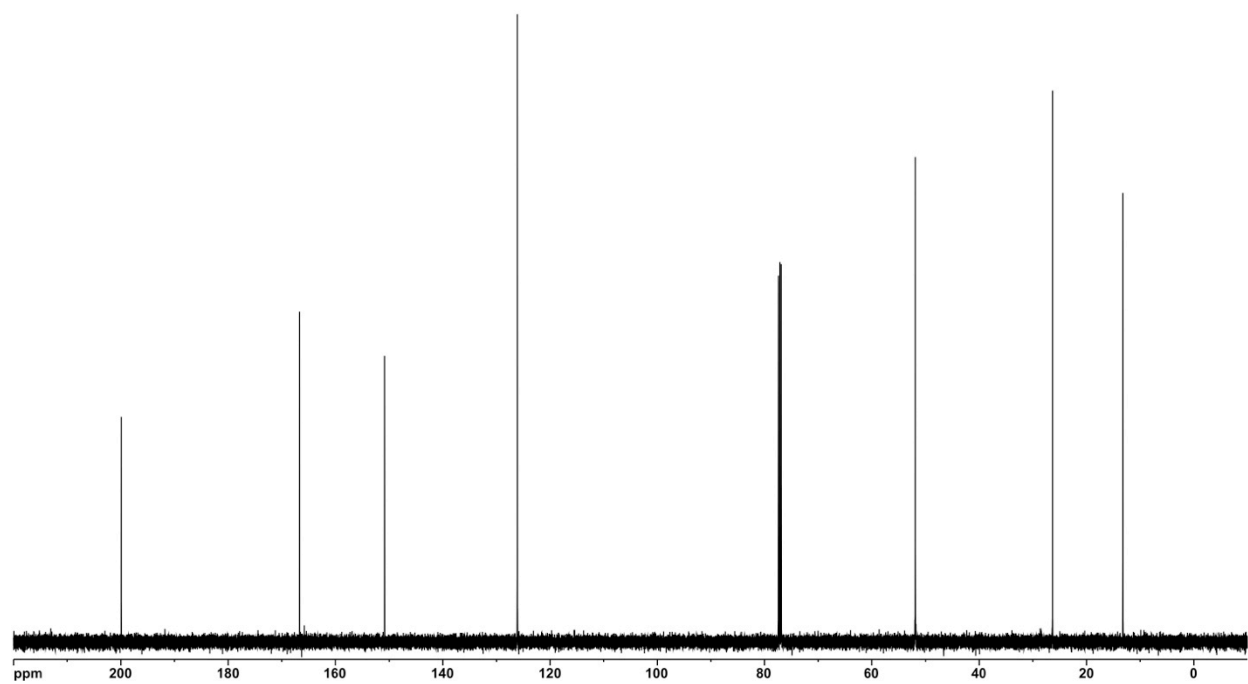

<sup>1</sup>H (500 MHz) and <sup>13</sup>C NMR (125 MHz) spectra of ketoester **S7** in CDCl<sub>3</sub>

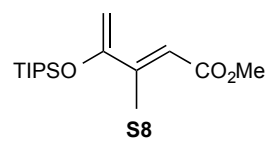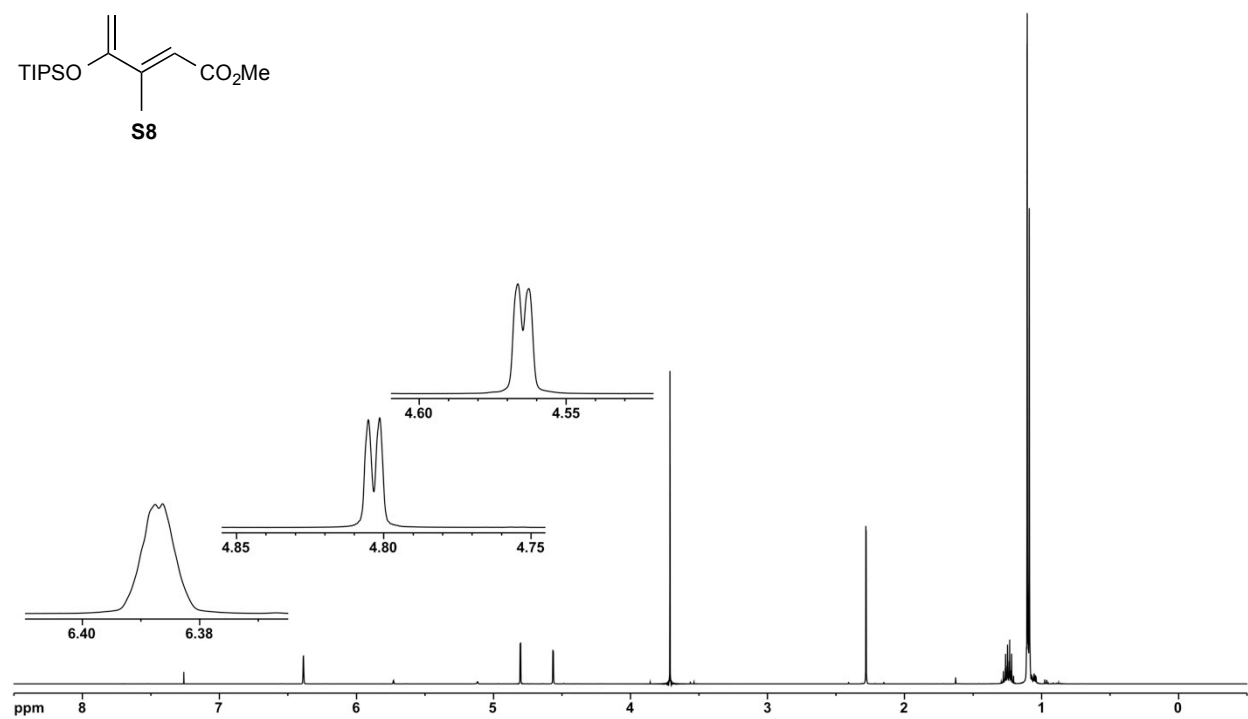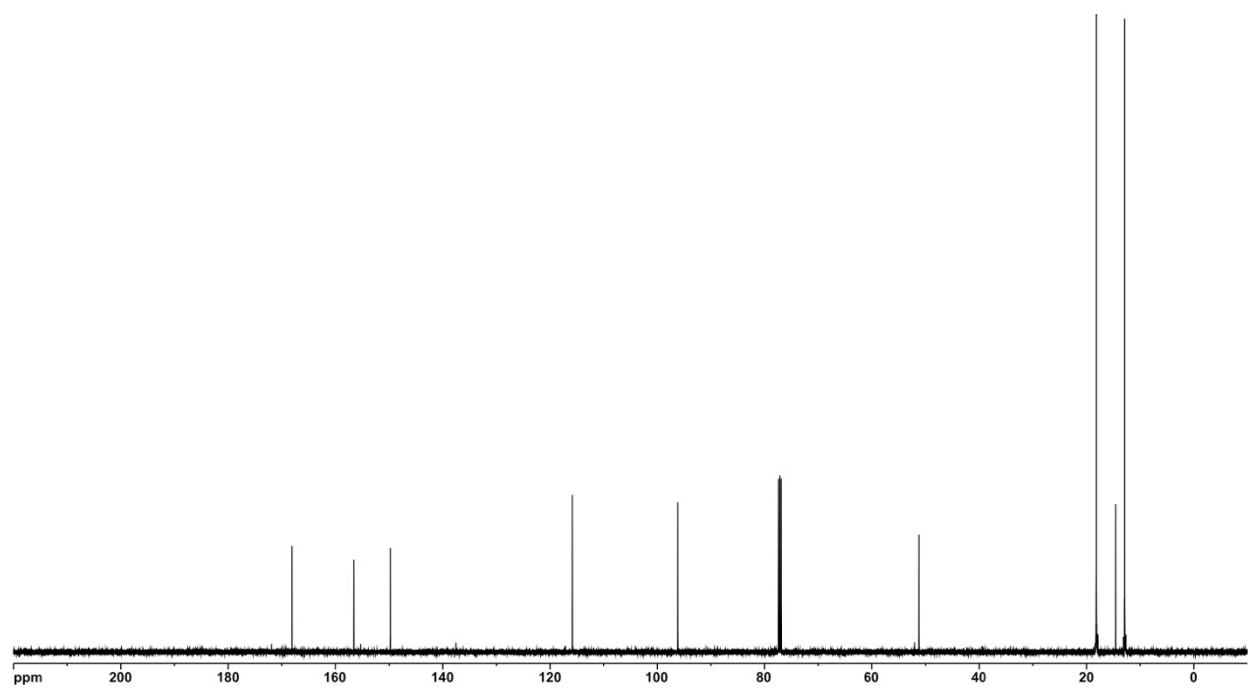

$^1\text{H}$  (500 MHz) and  $^{13}\text{C}$  NMR (125 MHz) spectra of diene **S8** in  $\text{CDCl}_3$





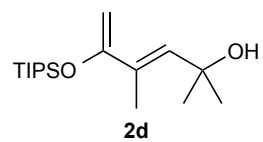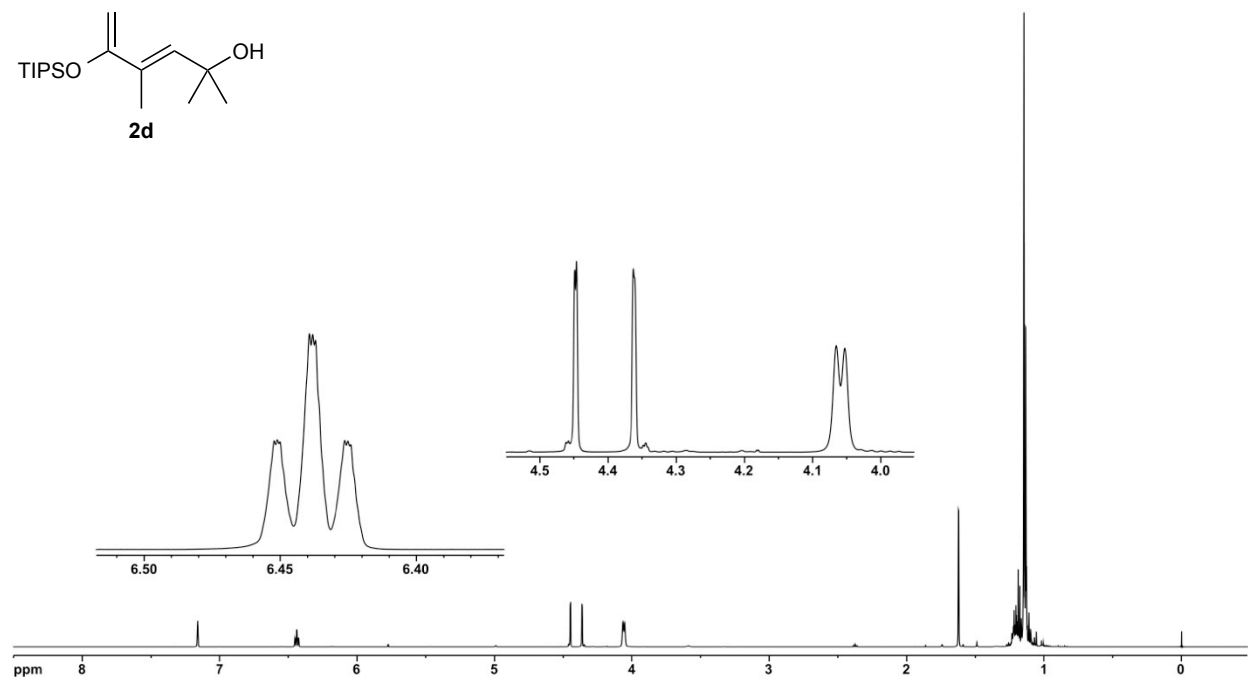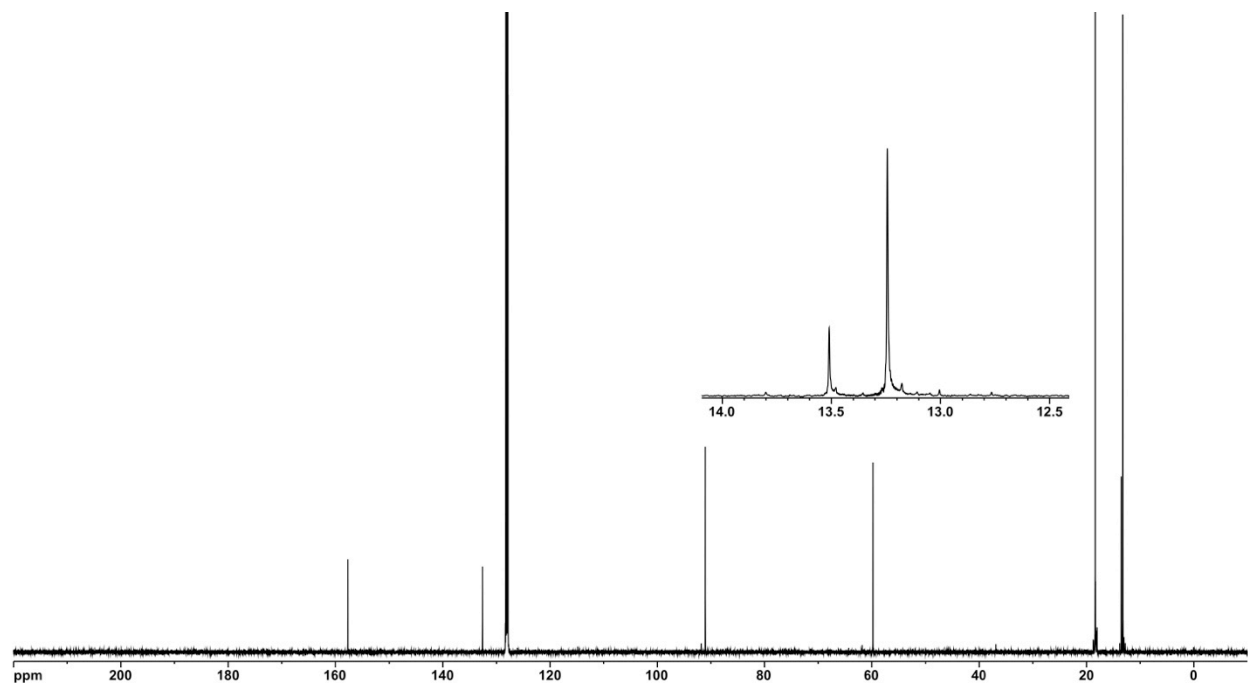

$^1\text{H}$  (500 MHz) and  $^{13}\text{C}$  NMR (125 MHz) spectra of silyloxydiene alcohol **2d** in  $\text{C}_6\text{D}_6$

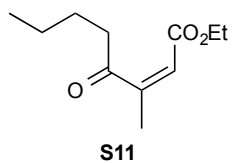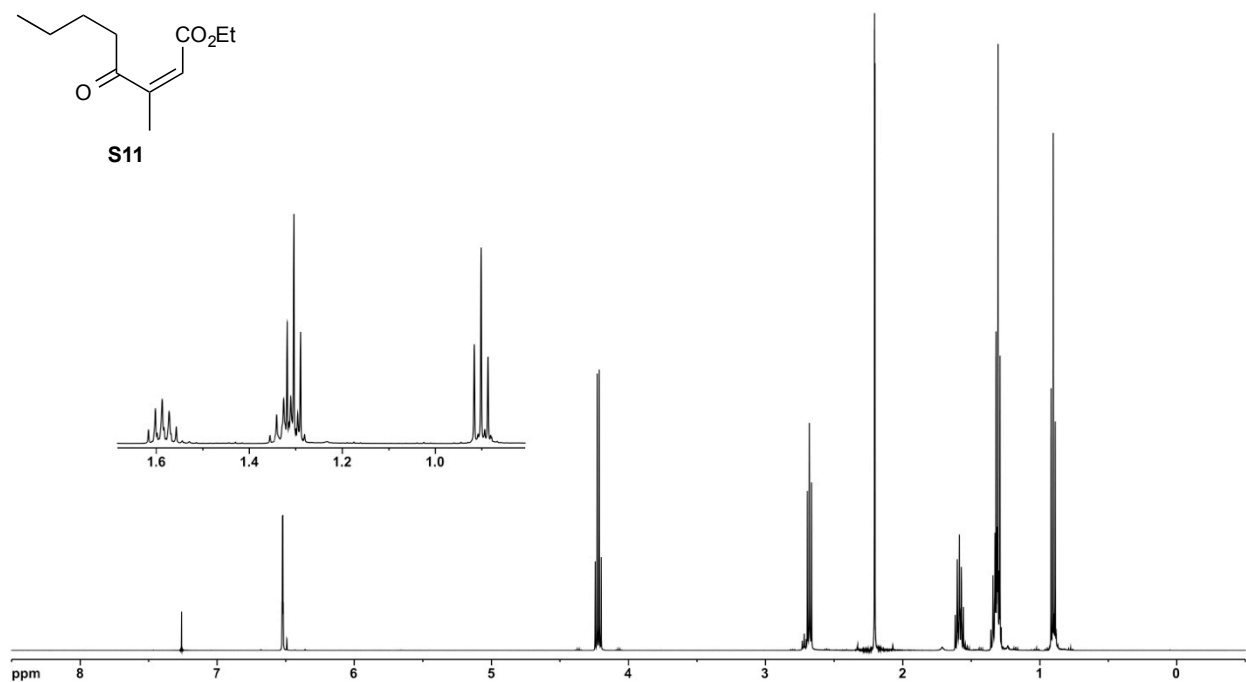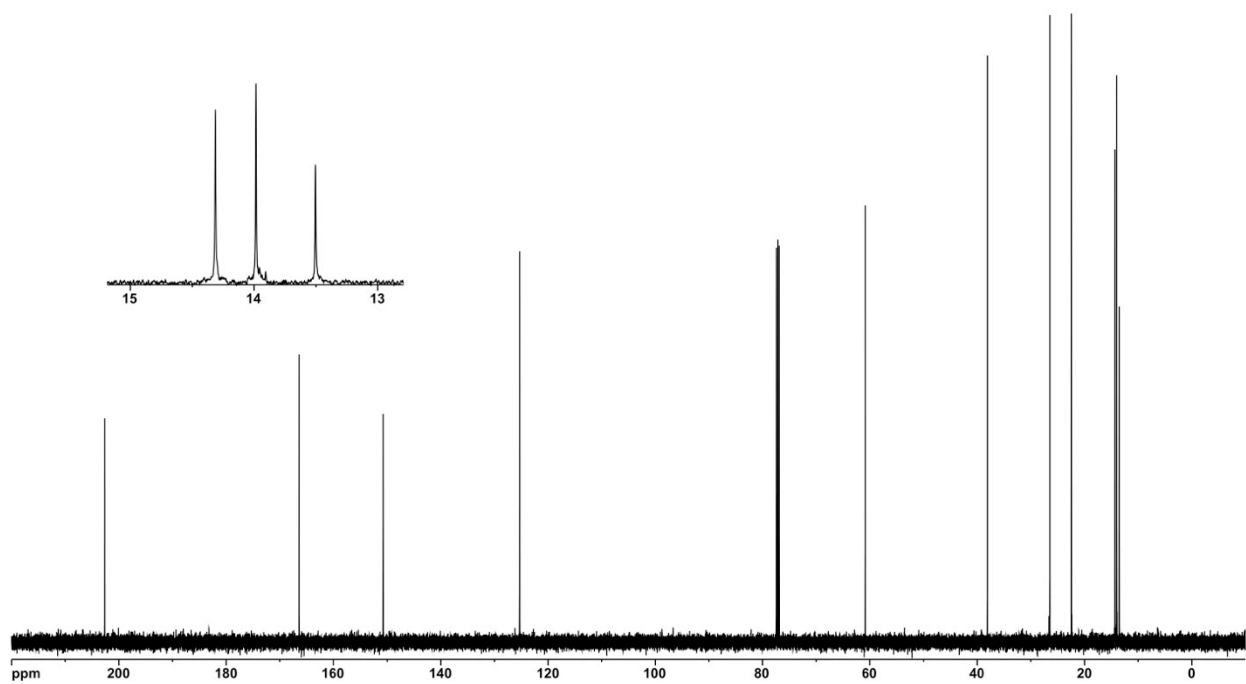

$^1\text{H}$  (500 MHz) and  $^{13}\text{C}$  NMR (125 MHz) spectra of ketoester **S11** in  $\text{CDCl}_3$

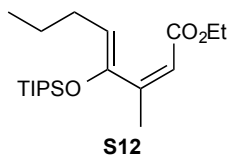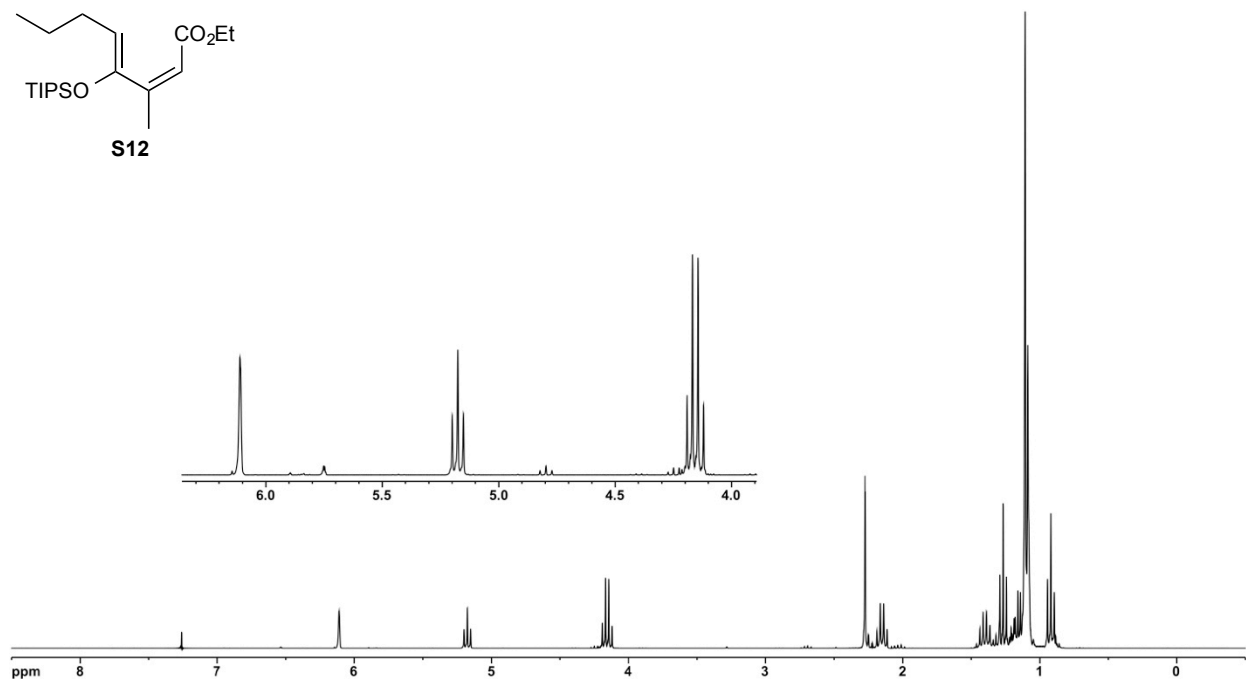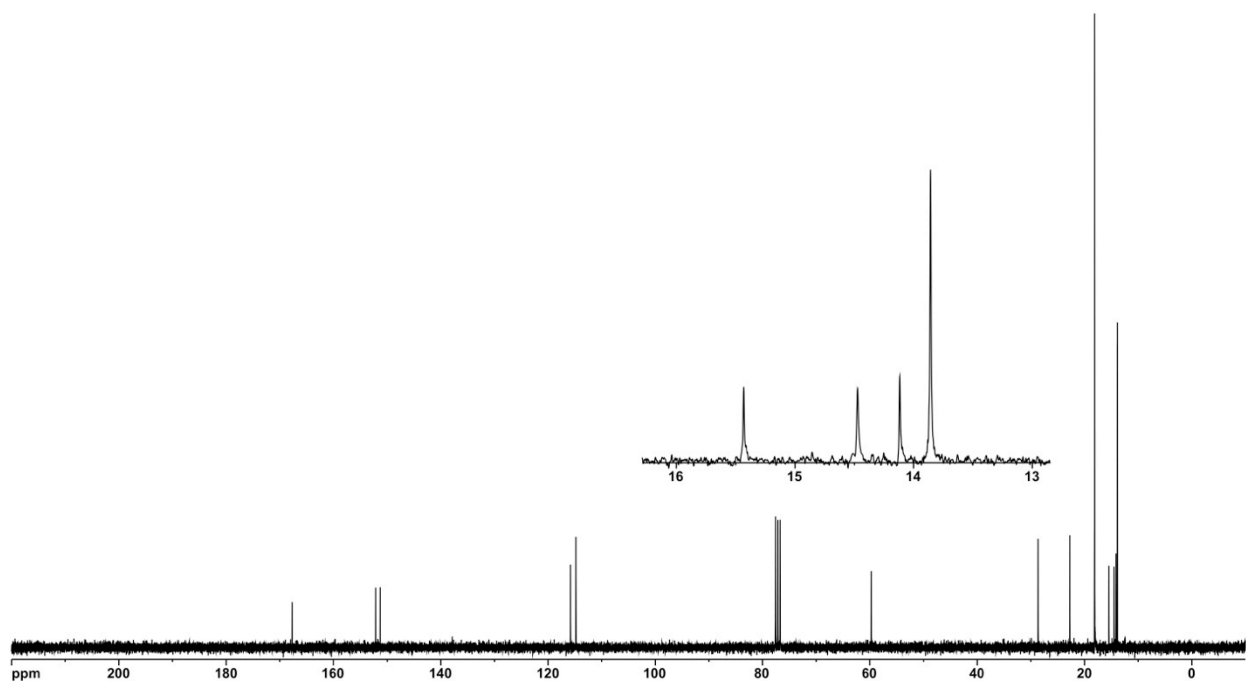

$^1\text{H}$  (500 MHz) and  $^{13}\text{C}$  NMR (125 MHz) spectra of diene **S12** in  $\text{CDCl}_3$

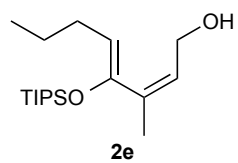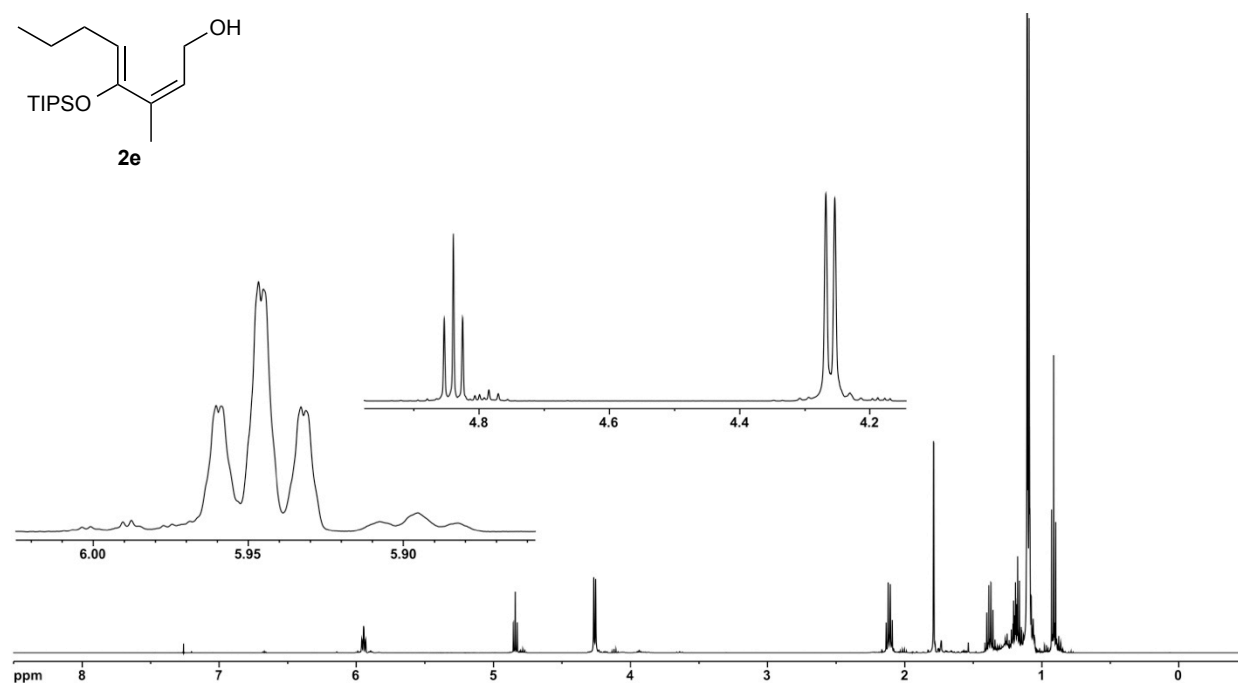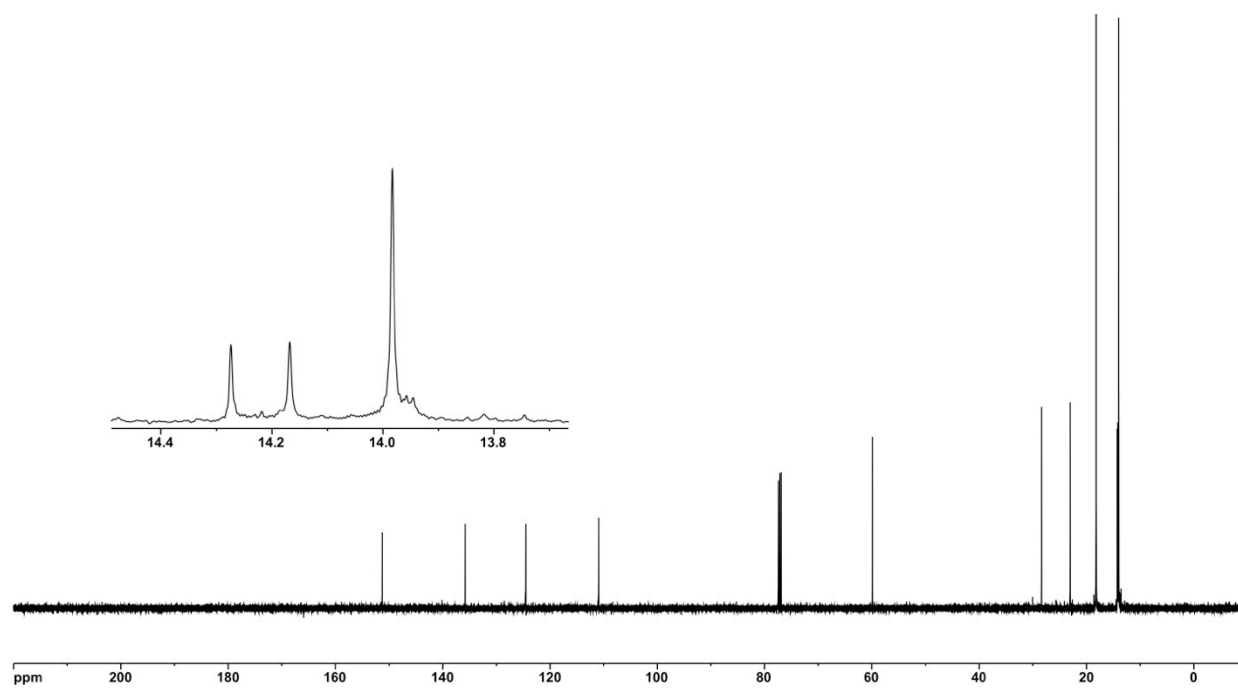

$^1\text{H}$  (500 MHz) and  $^{13}\text{C}$  NMR (125 MHz) spectra of silyloxydiene alcohol **2e** in  $\text{CDCl}_3$

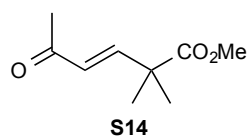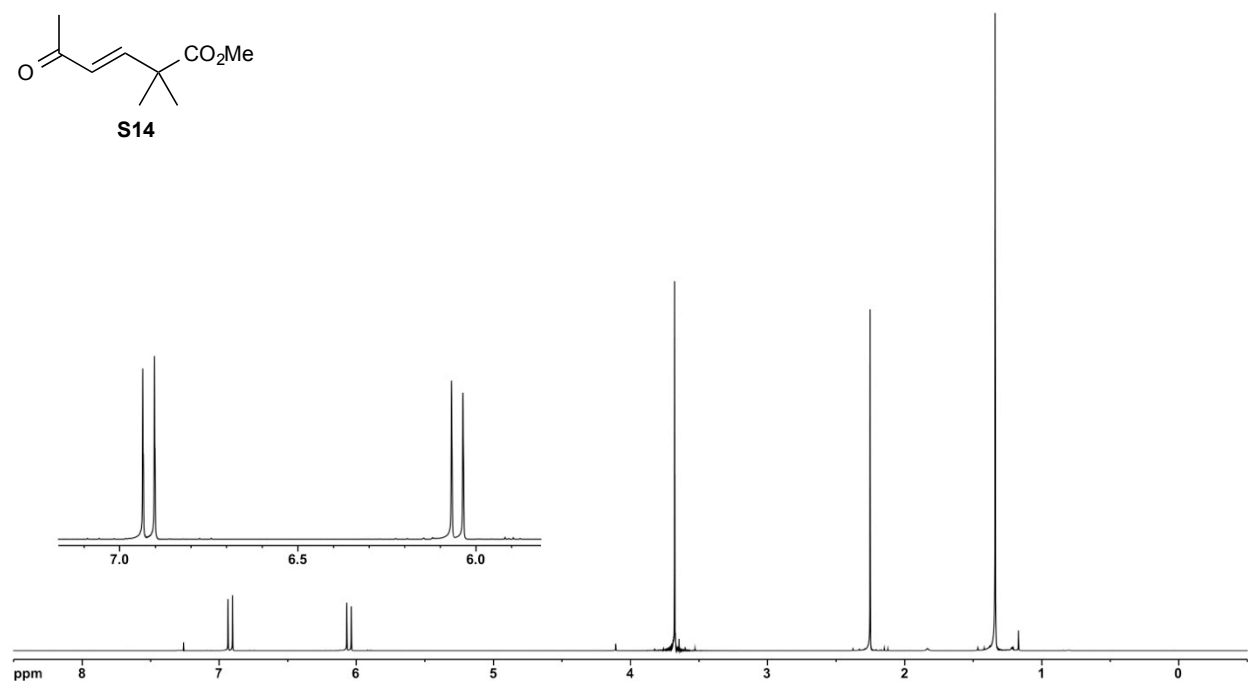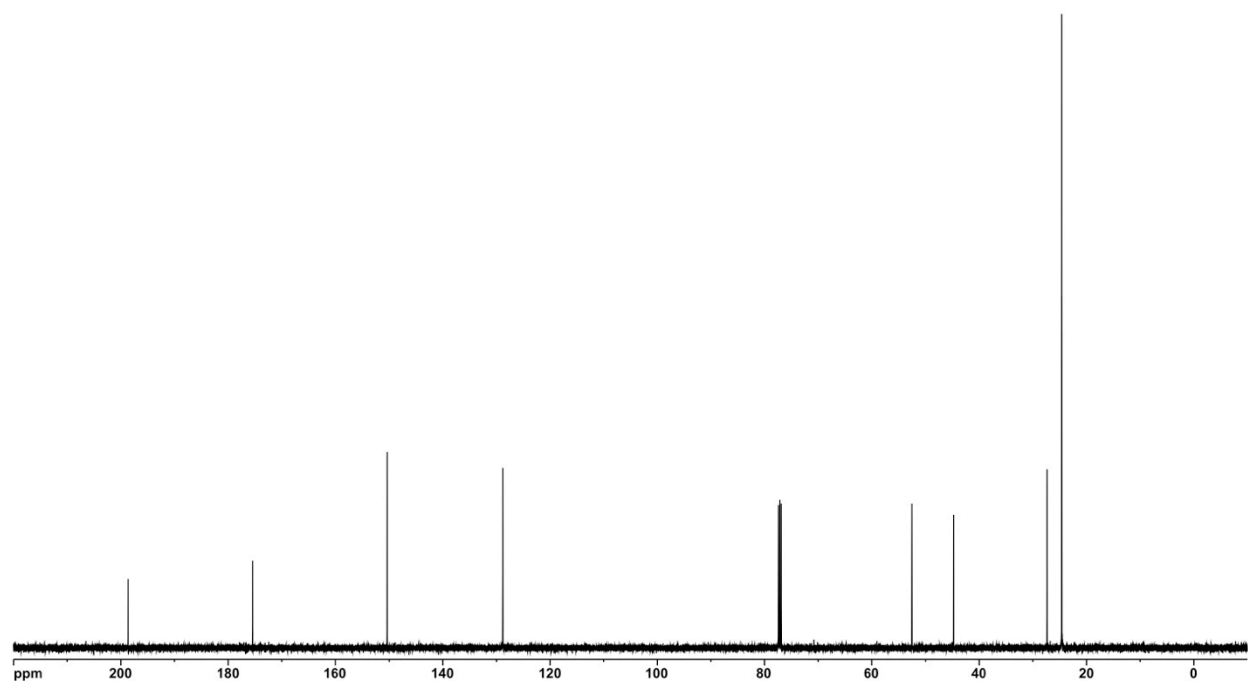

$^1\text{H}$  (500 MHz) and  $^{13}\text{C}$  NMR (125 MHz) spectra of ketoester **S14** in  $\text{CDCl}_3$

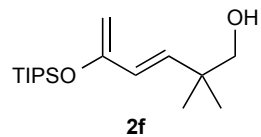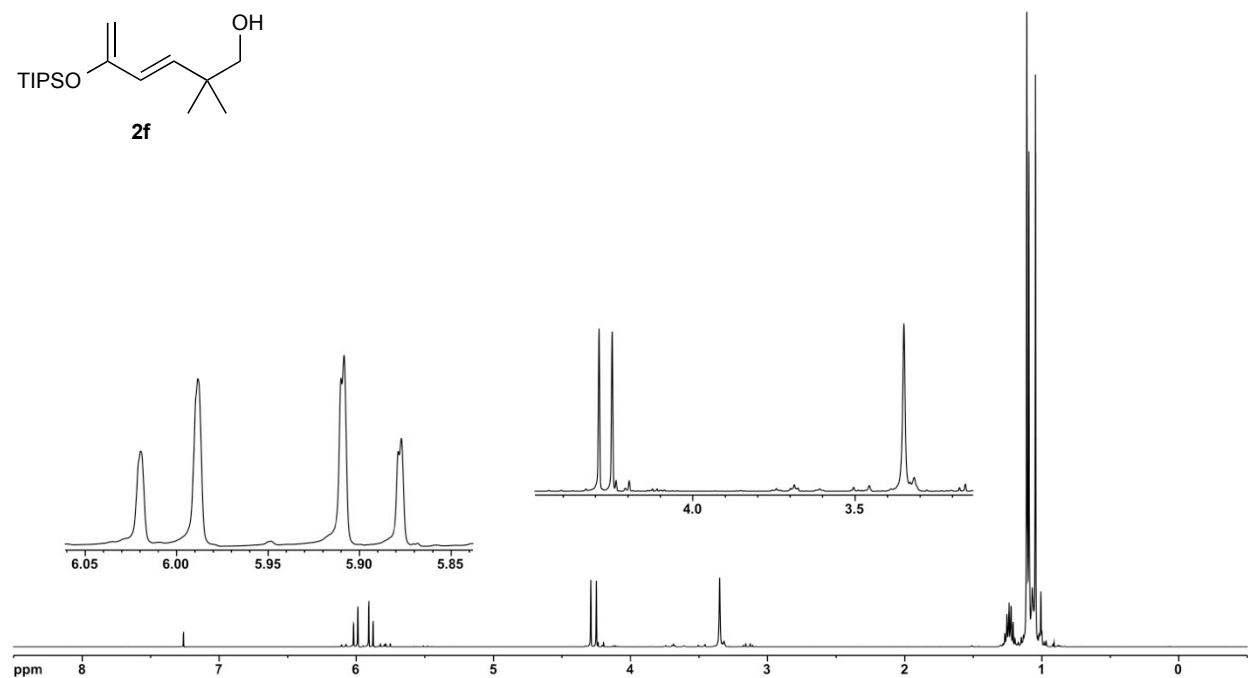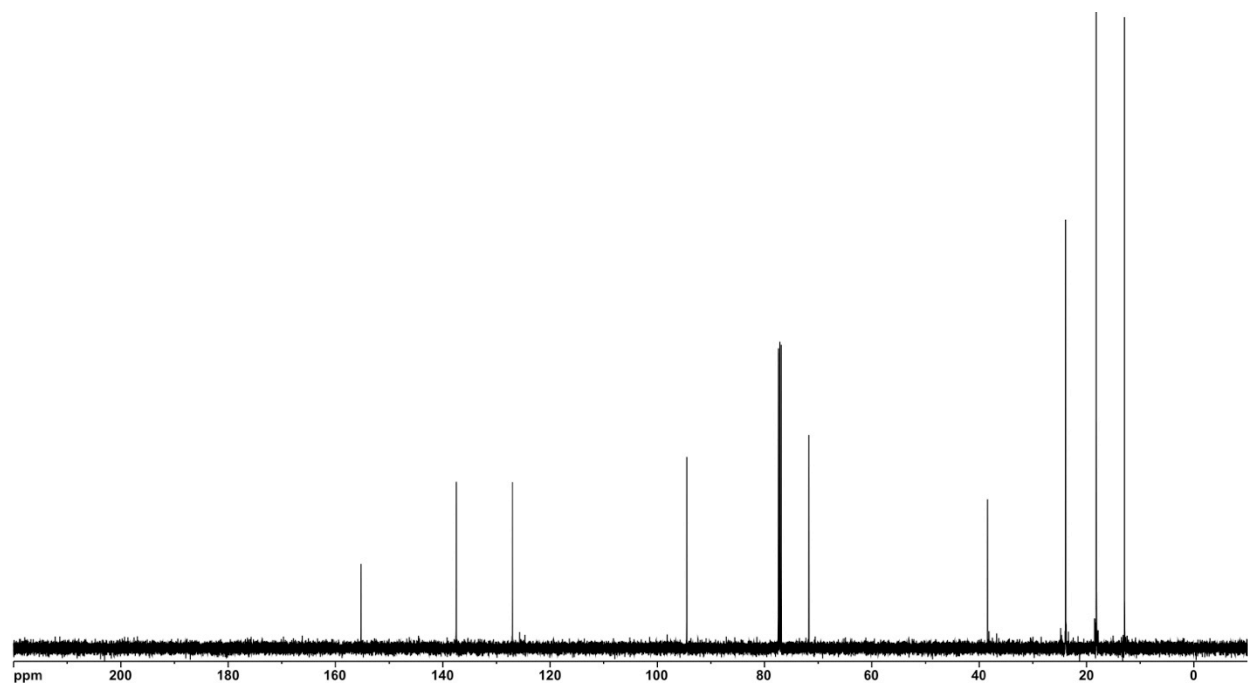

$^1\text{H}$  (500 MHz) and  $^{13}\text{C}$  NMR (125 MHz) spectra of silyloxydiene alcohol **2f** in  $\text{CDCl}_3$

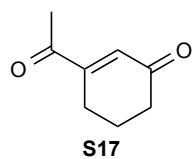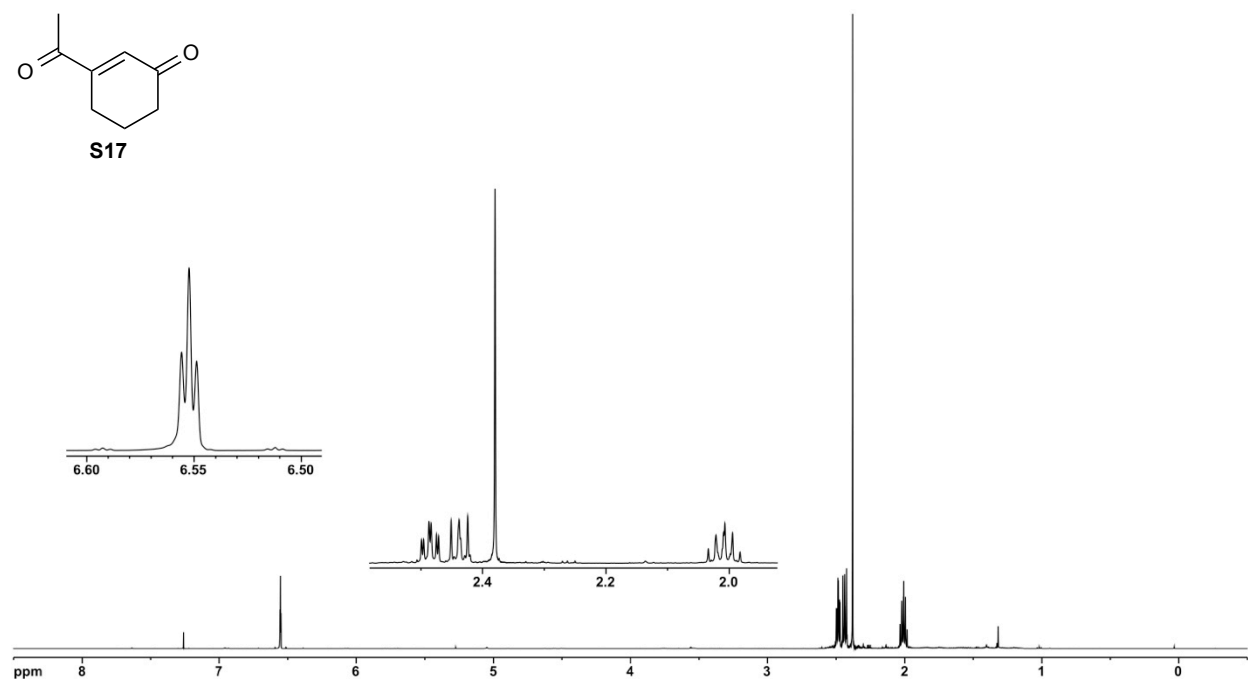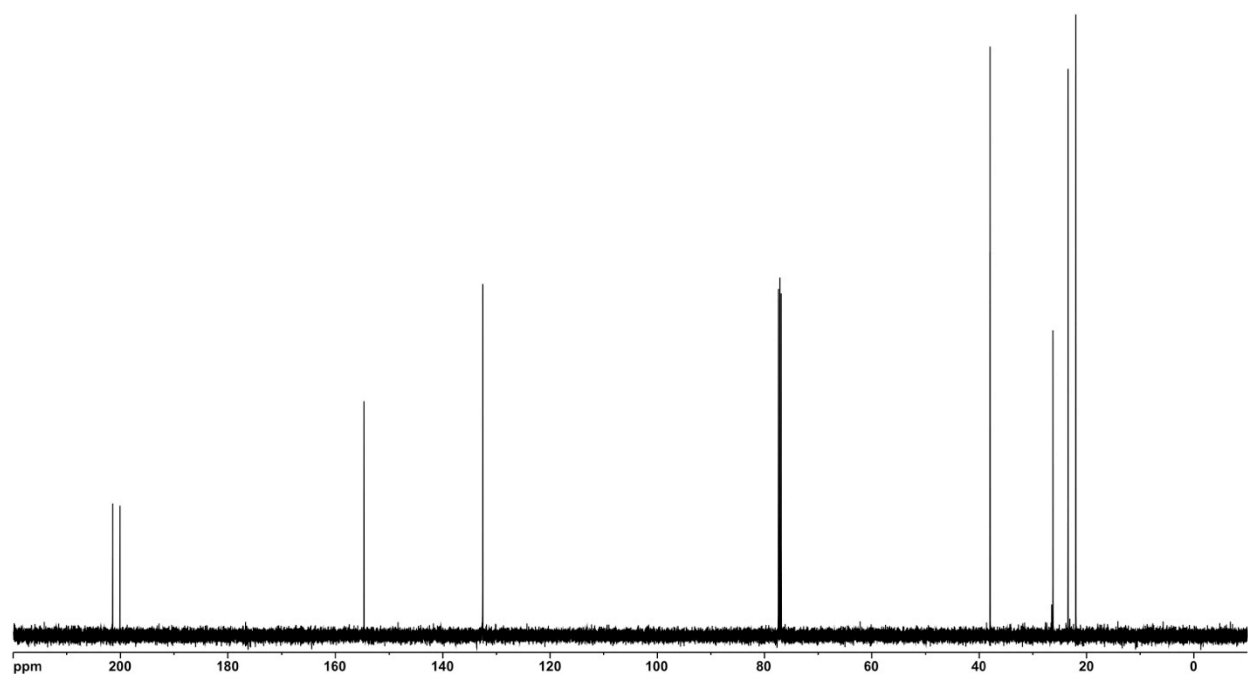

$^1\text{H}$  (500 MHz) and  $^{13}\text{C}$  NMR (125 MHz) spectra of diketone **S17** in  $\text{CDCl}_3$



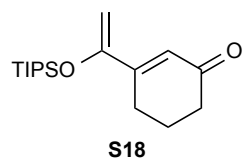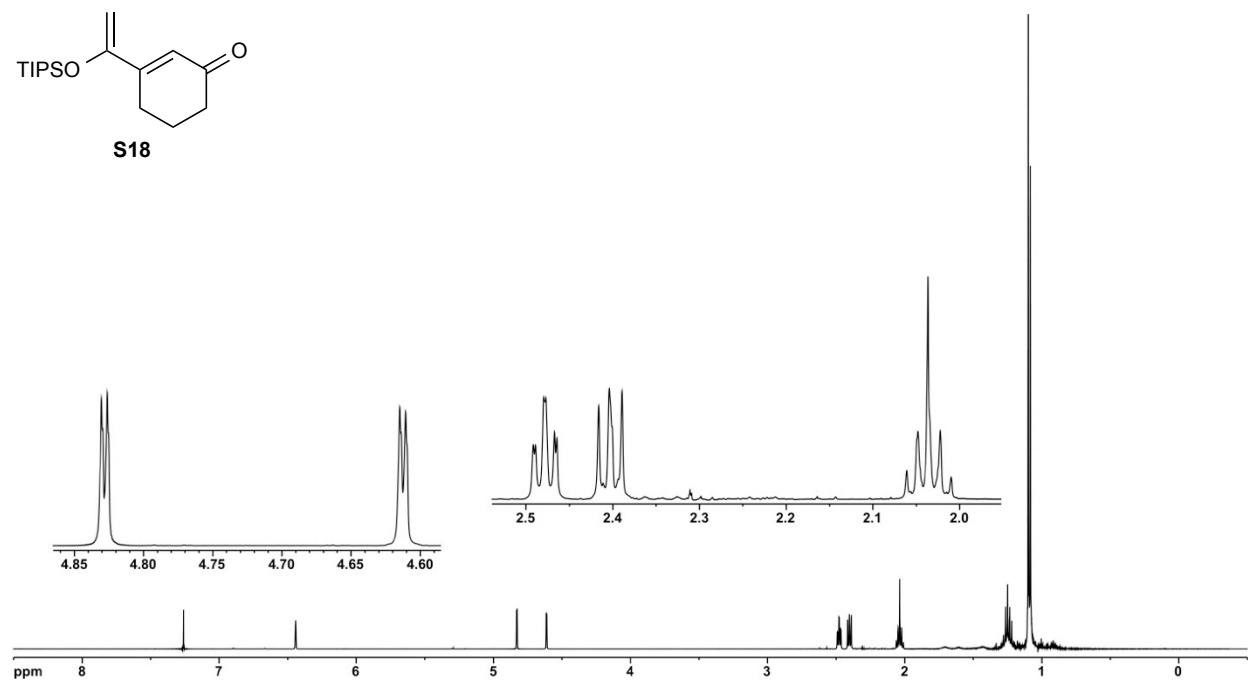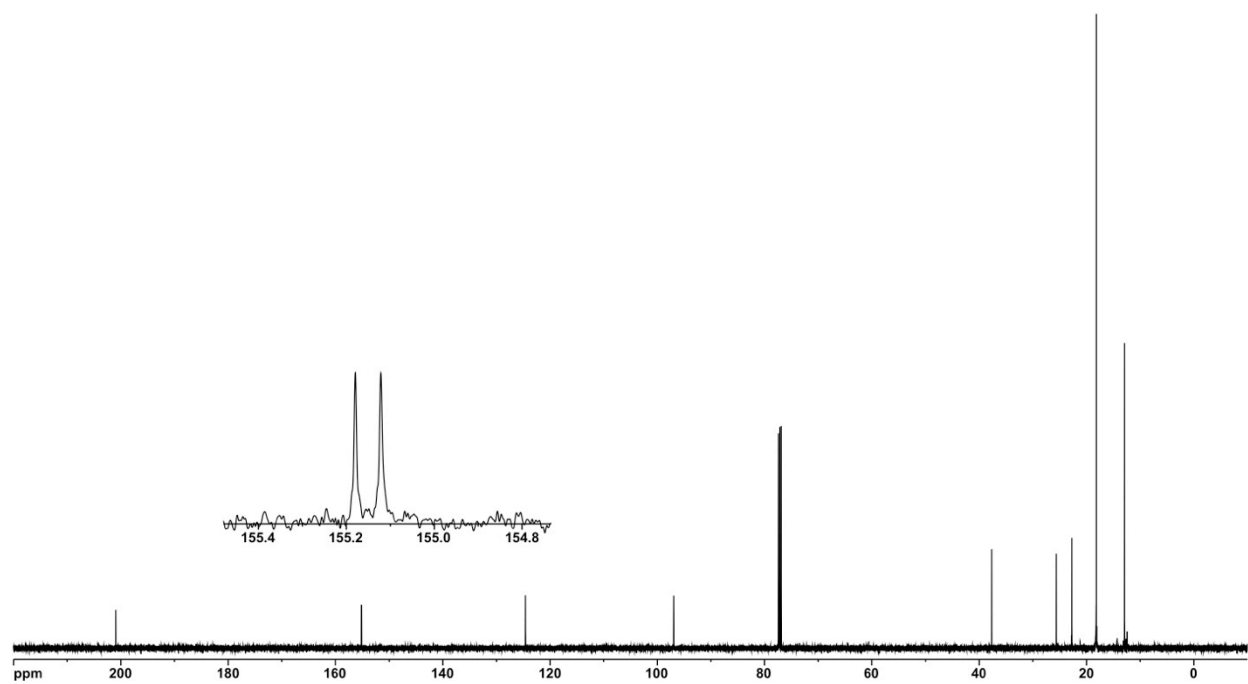

$^1\text{H}$  (500 MHz) and  $^{13}\text{C}$  NMR (125 MHz) spectra of diene **S18** in  $\text{CDCl}_3$



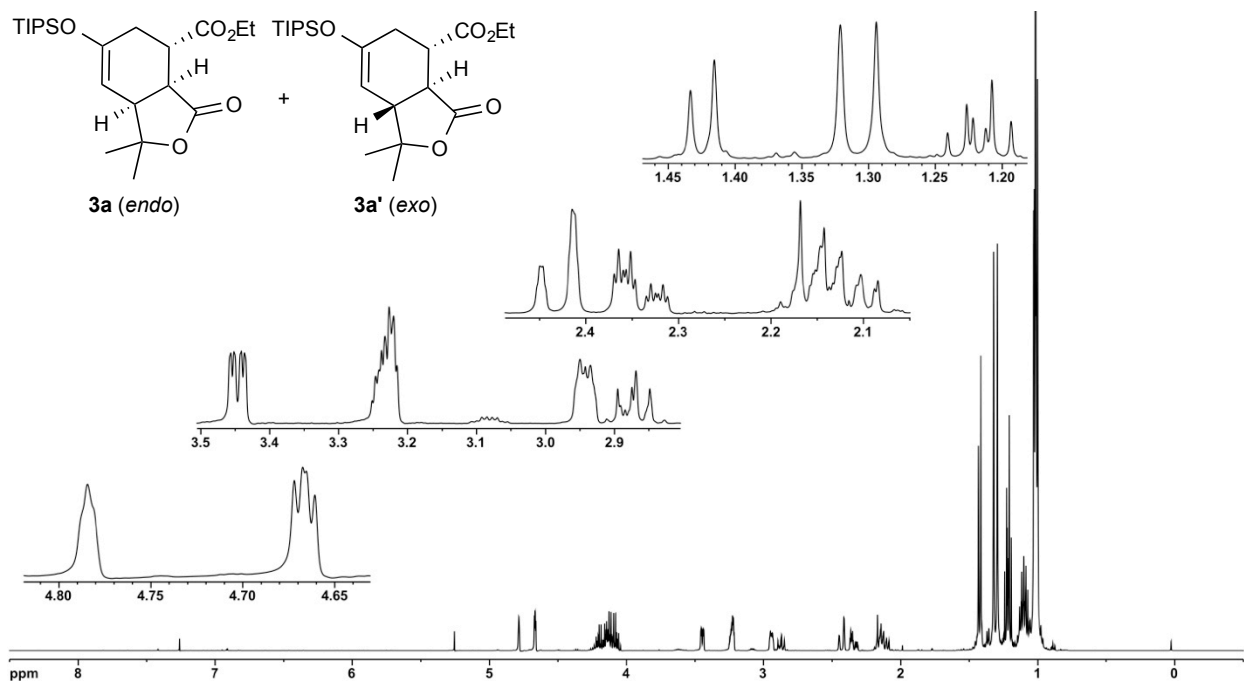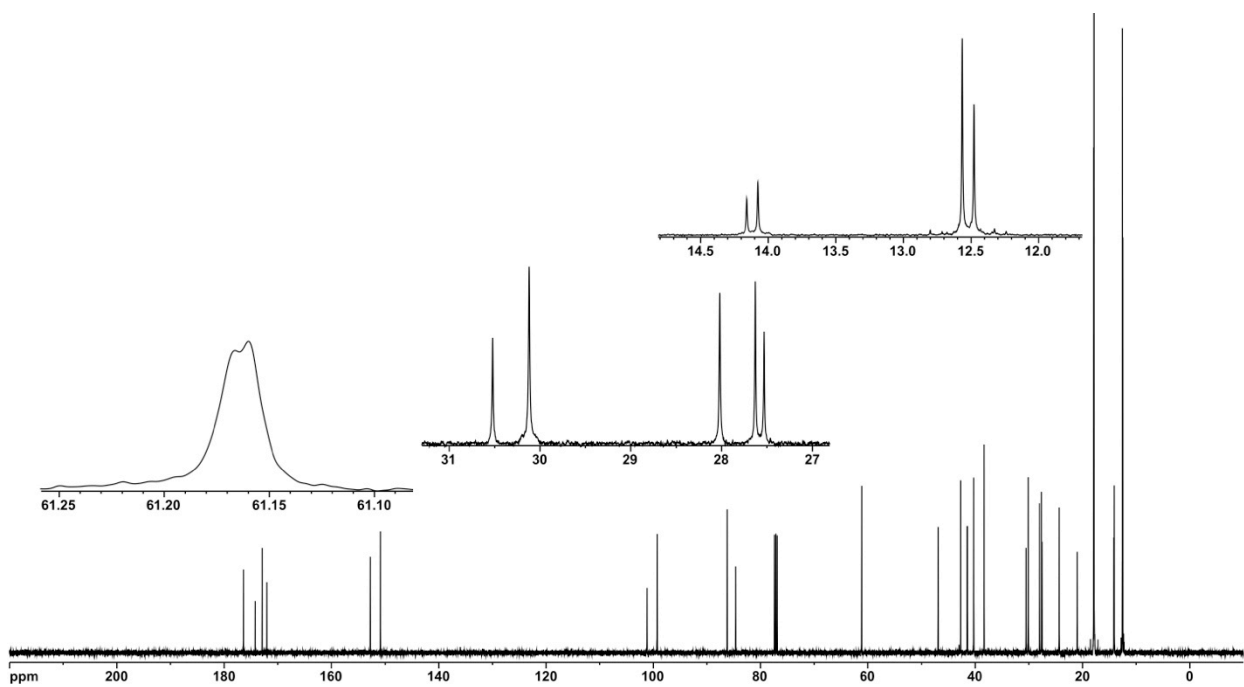

<sup>1</sup>H (500 MHz) and <sup>13</sup>C NMR (125 MHz) spectra of bicyclic  $\gamma$ -lactones **3a** and **3a'** (1.5:1 mixture of *endo/exo* diastereomers) in CDCl<sub>3</sub>



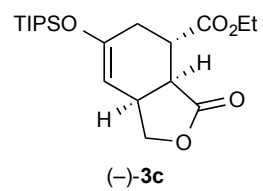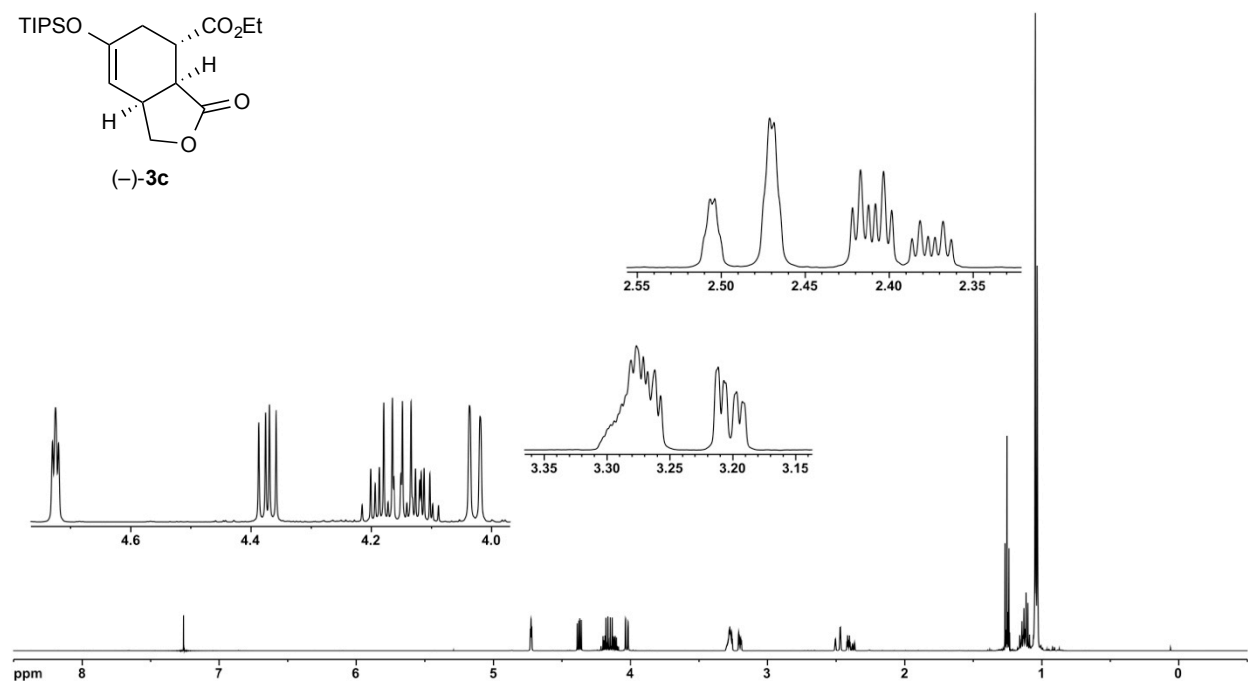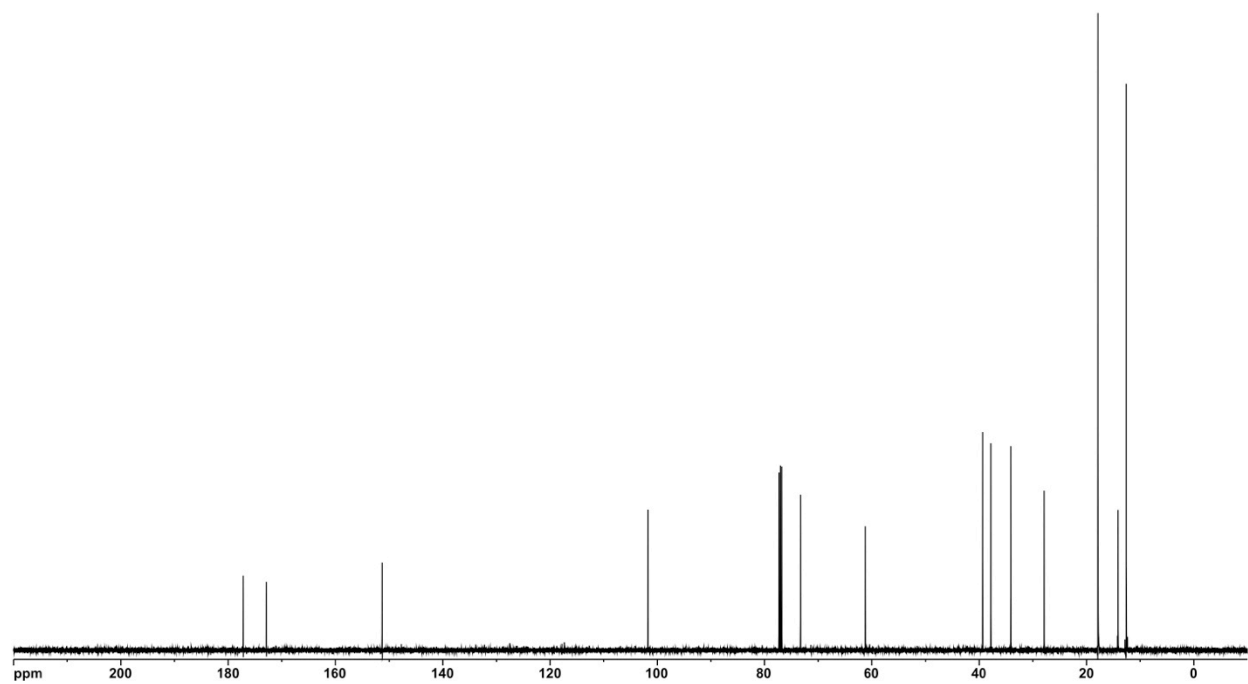

$^1\text{H}$  (500 MHz) and  $^{13}\text{C}$  NMR (125 MHz) spectra of bicyclic  $\gamma$ -lactone (-)-**3c** in  $\text{CDCl}_3$

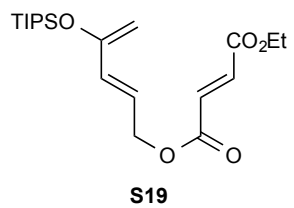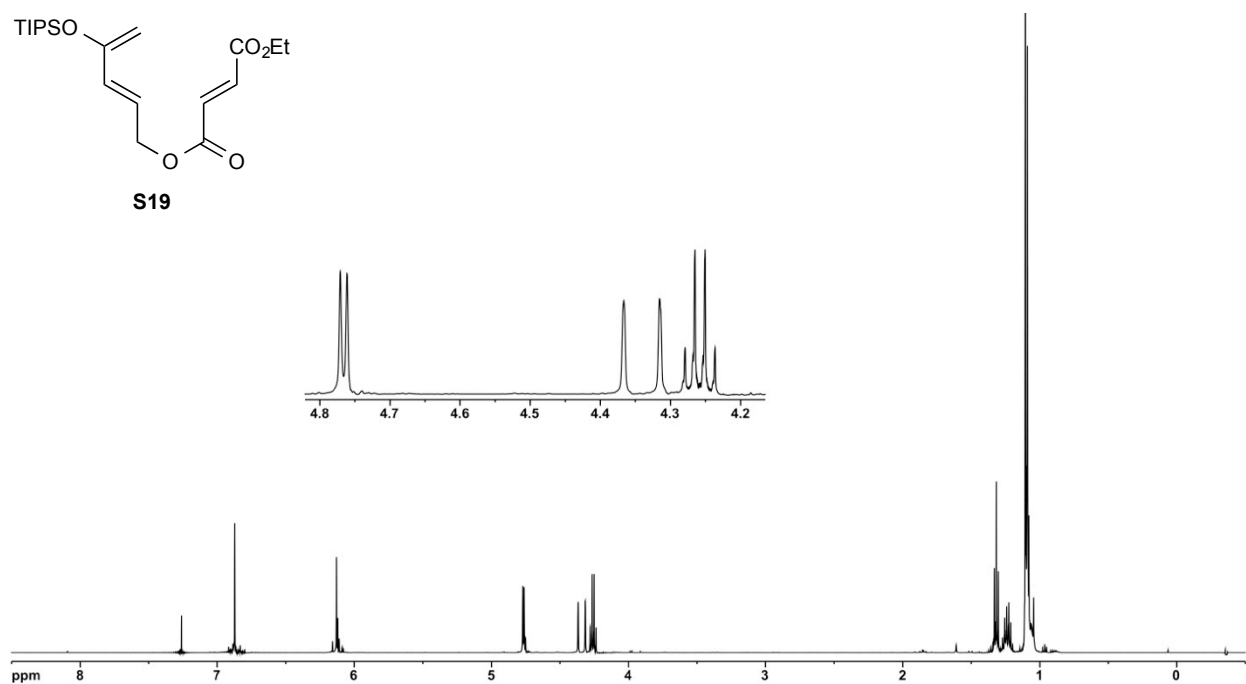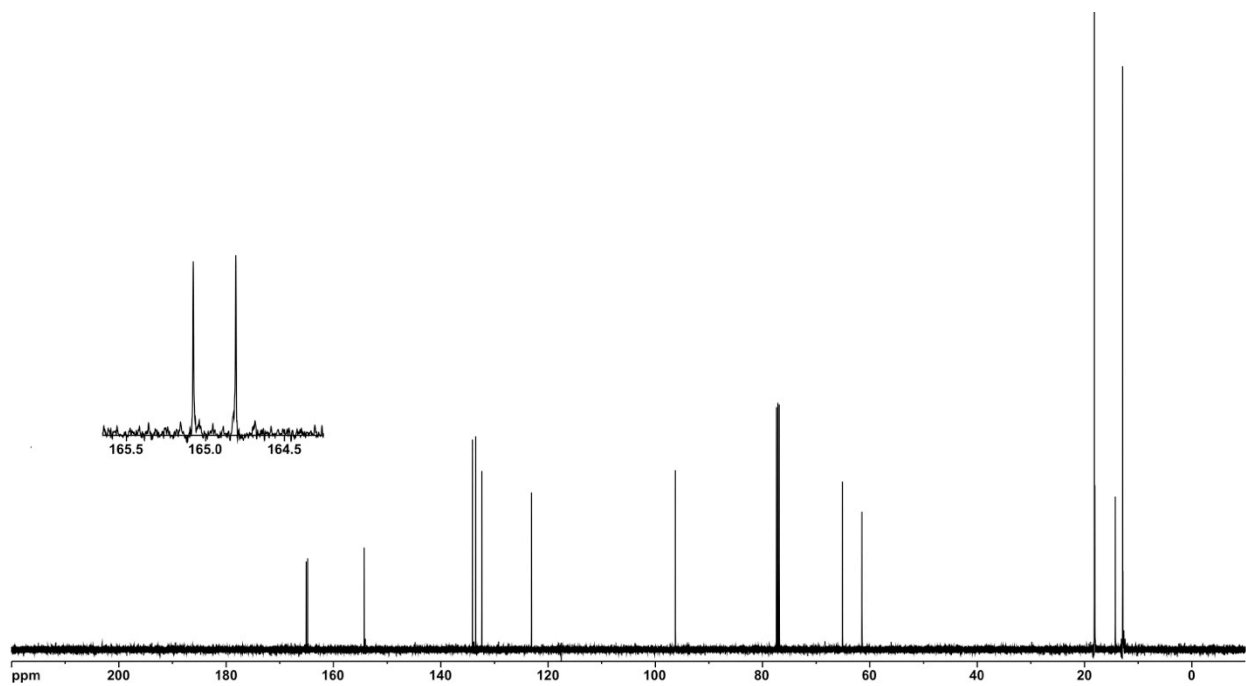

$^1\text{H}$  (500 MHz) and  $^{13}\text{C}$  NMR (125 MHz) spectra of ester **S19** in  $\text{CDCl}_3$

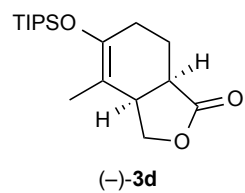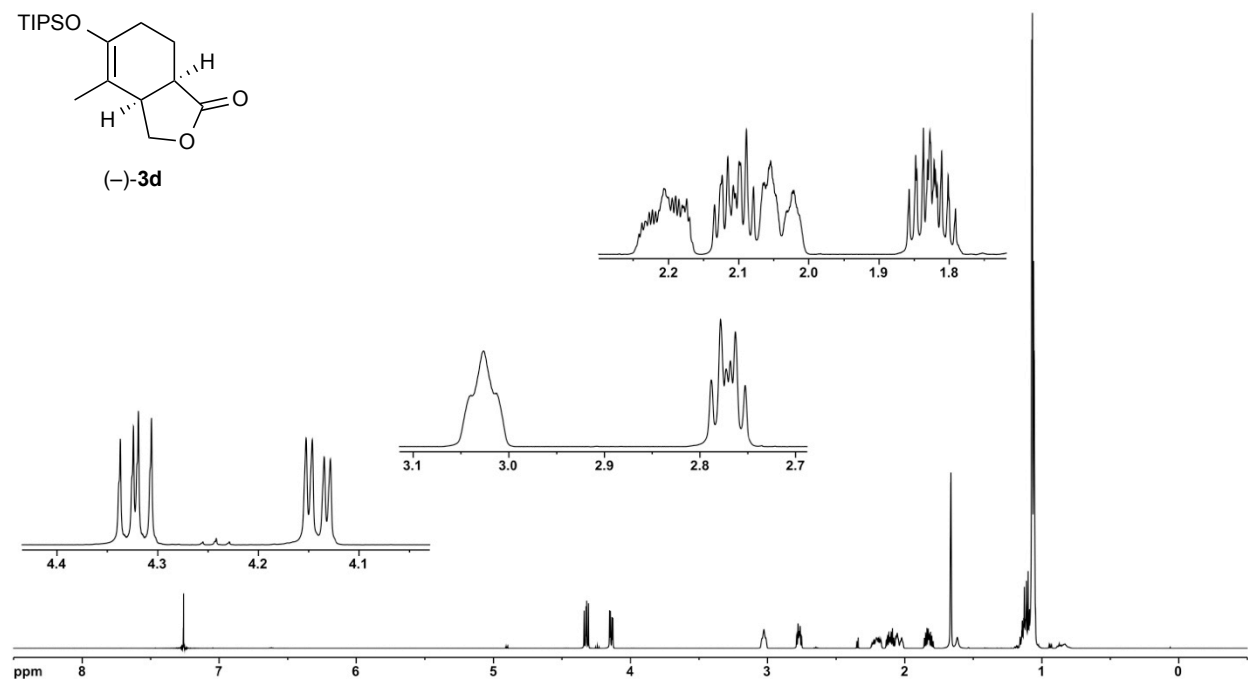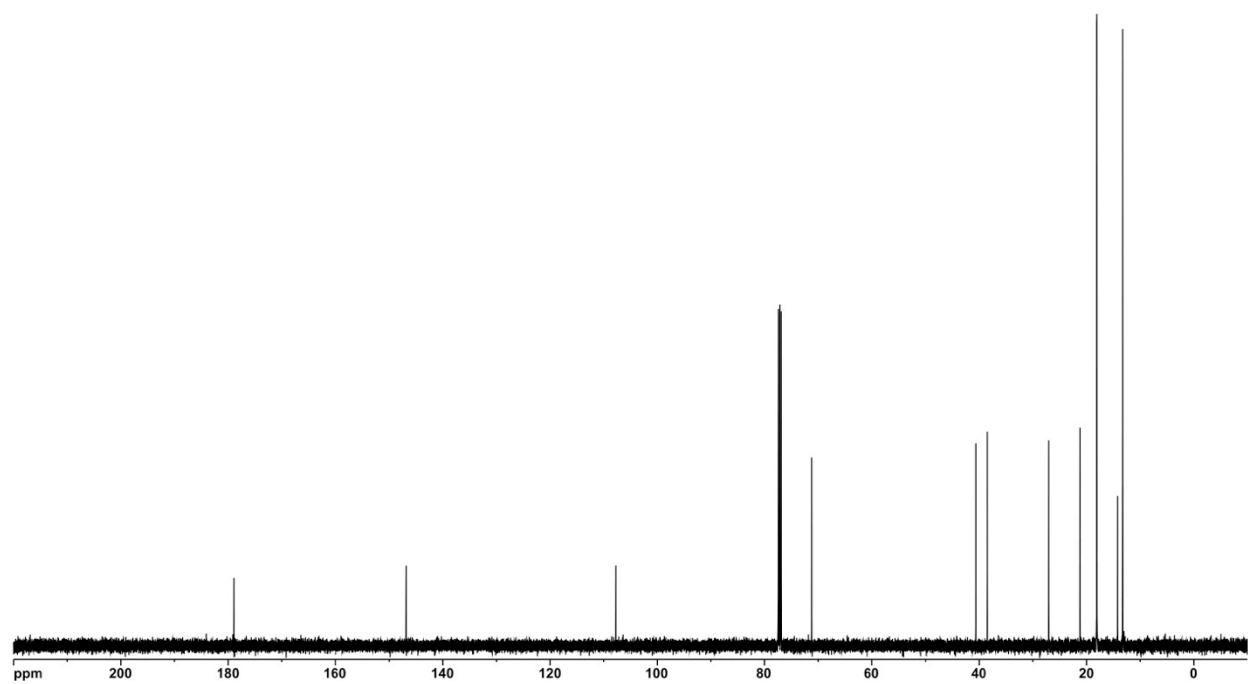

$^1\text{H}$  (500 MHz) and  $^{13}\text{C}$  NMR (125 MHz) spectra of bicyclic  $\gamma$ -lactone (-)-**3d** in  $\text{CDCl}_3$

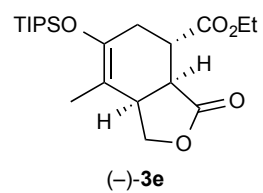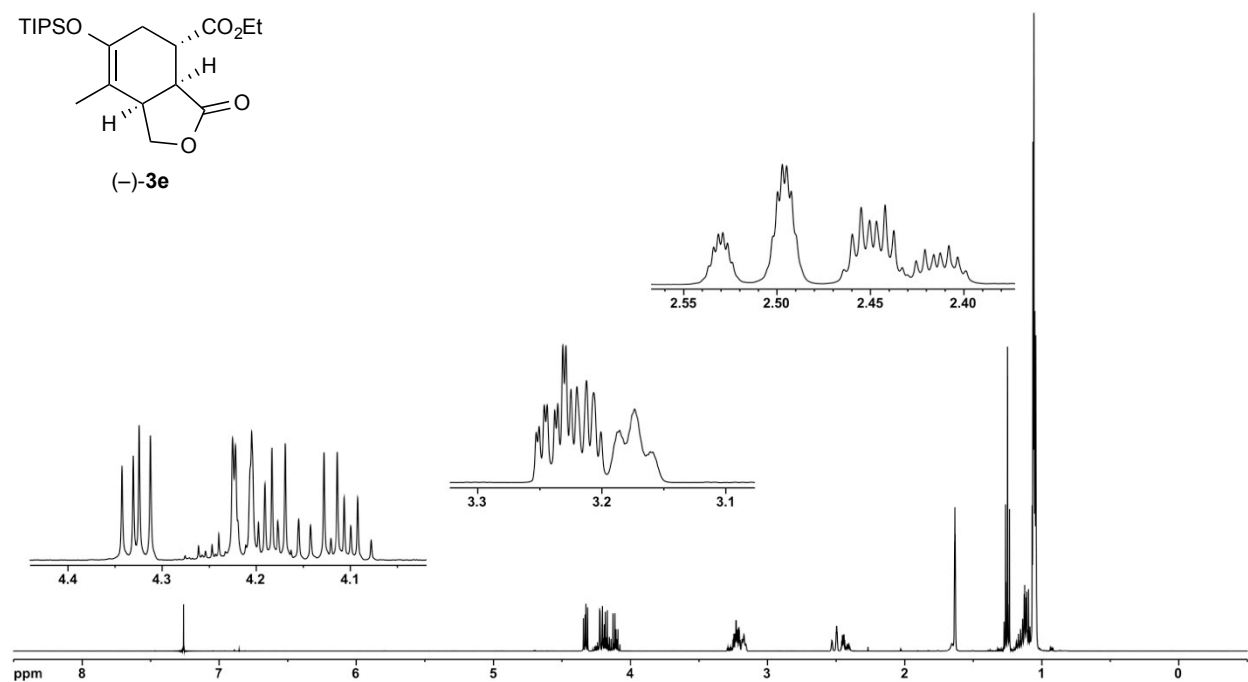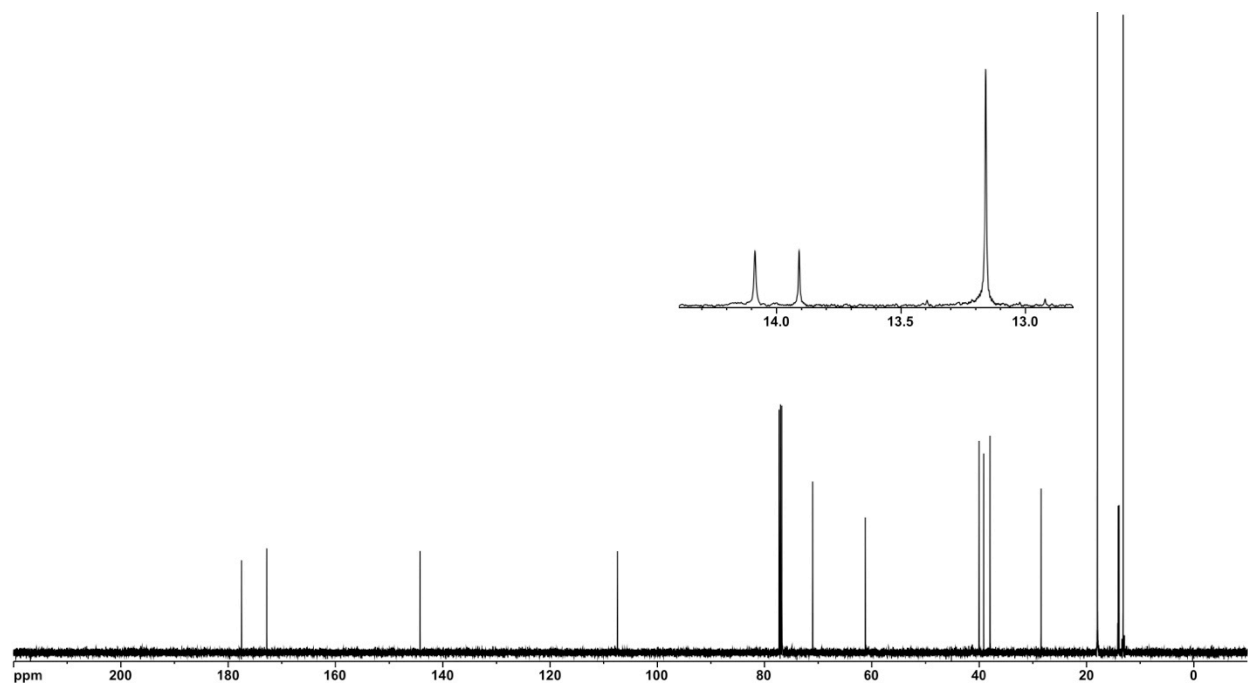

<sup>1</sup>H (500 MHz) and <sup>13</sup>C NMR (125 MHz) spectra of bicyclic  $\gamma$ -lactone (-)-**3e** in CDCl<sub>3</sub>



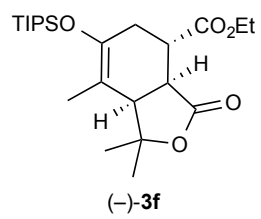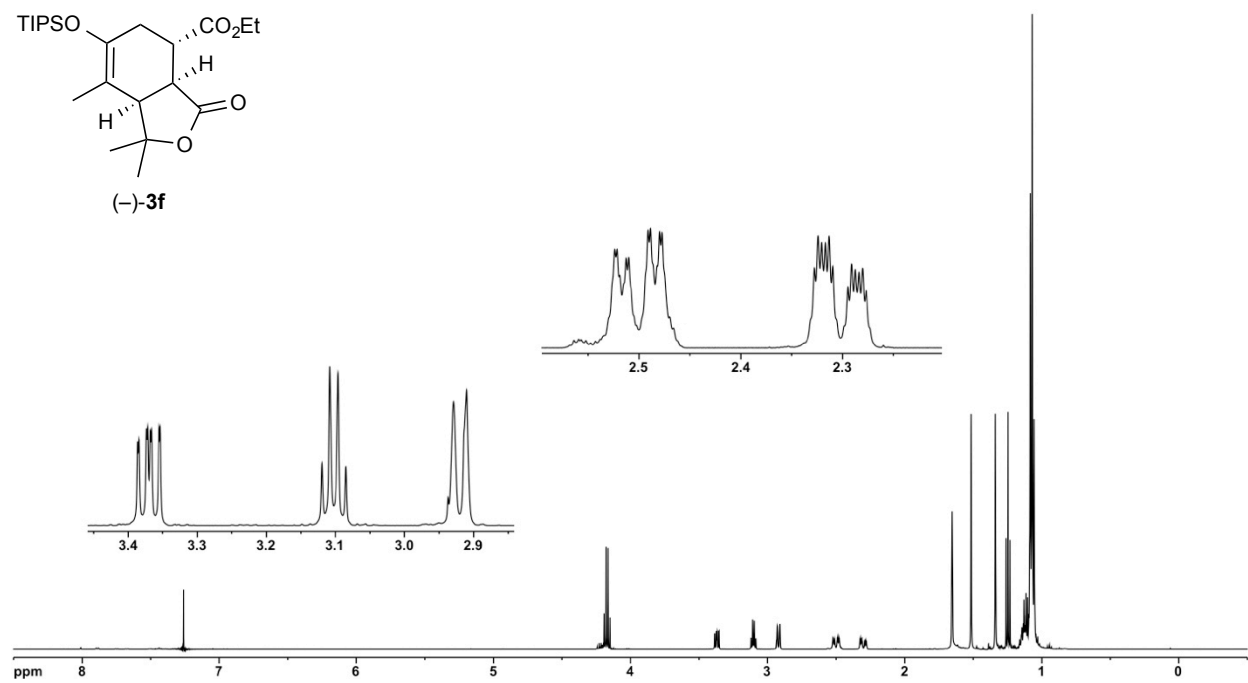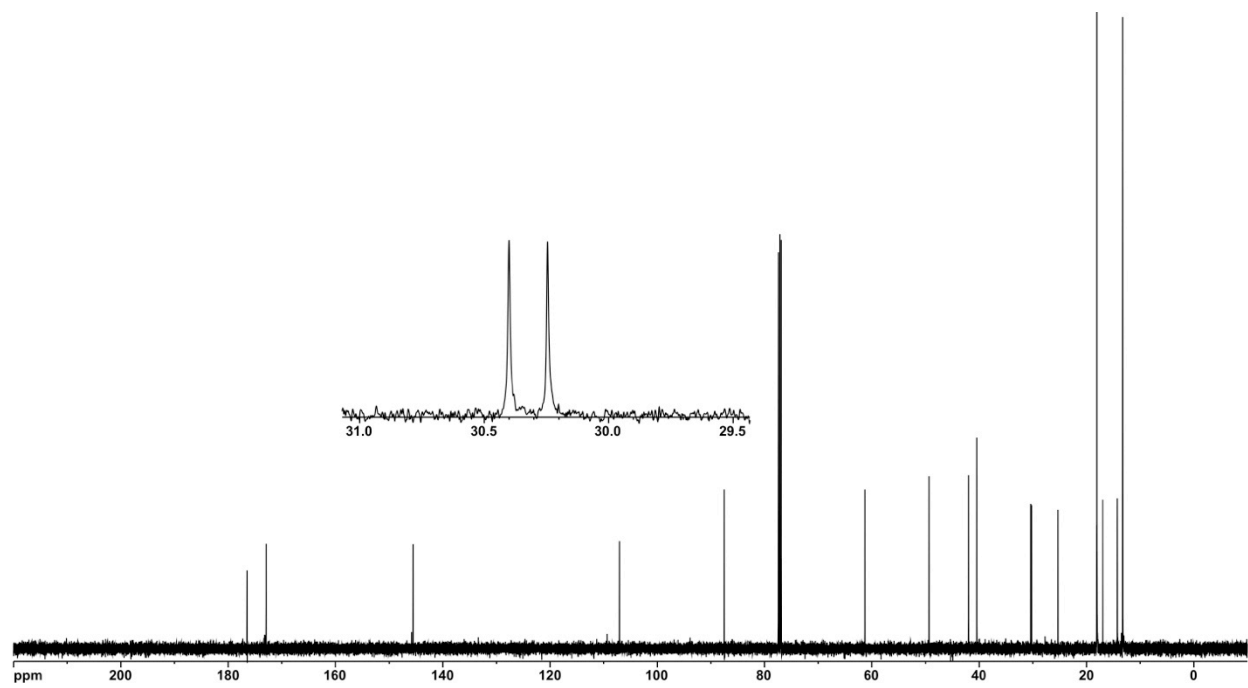

$^1\text{H}$  (500 MHz) and  $^{13}\text{C}$  NMR (125 MHz) spectra of bicyclic  $\gamma$ -lactone (-)-**3f** in  $\text{CDCl}_3$

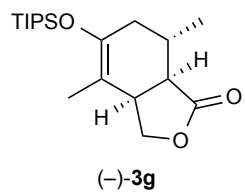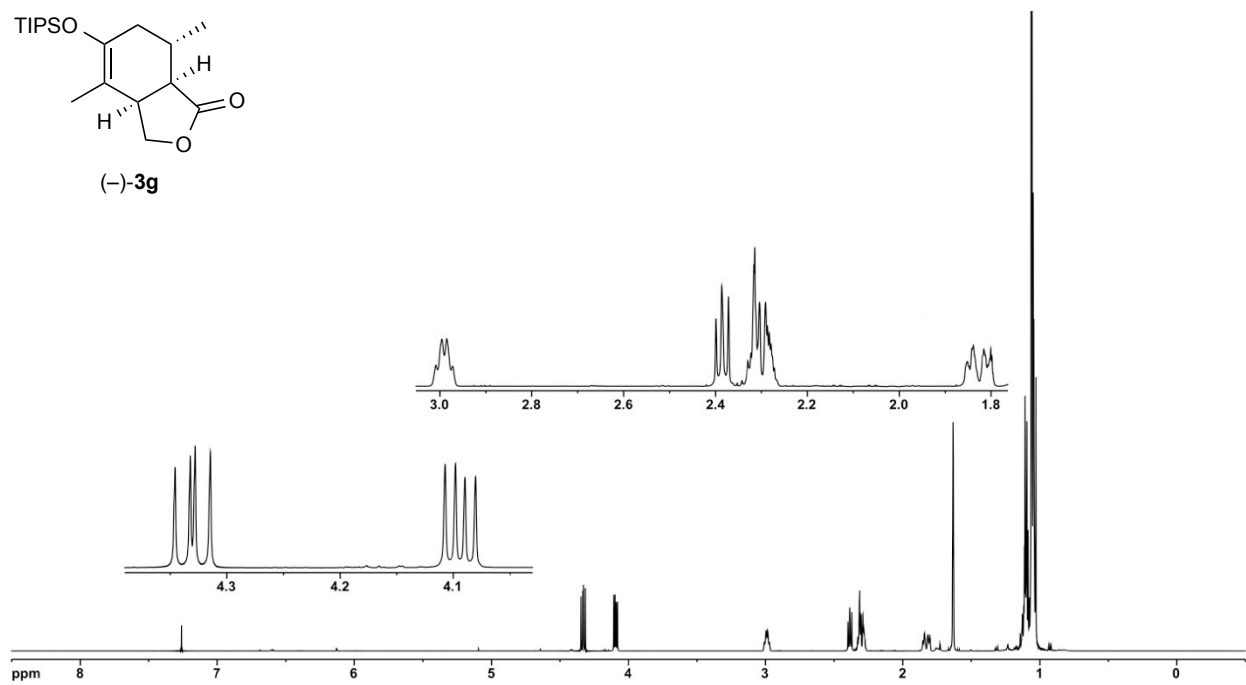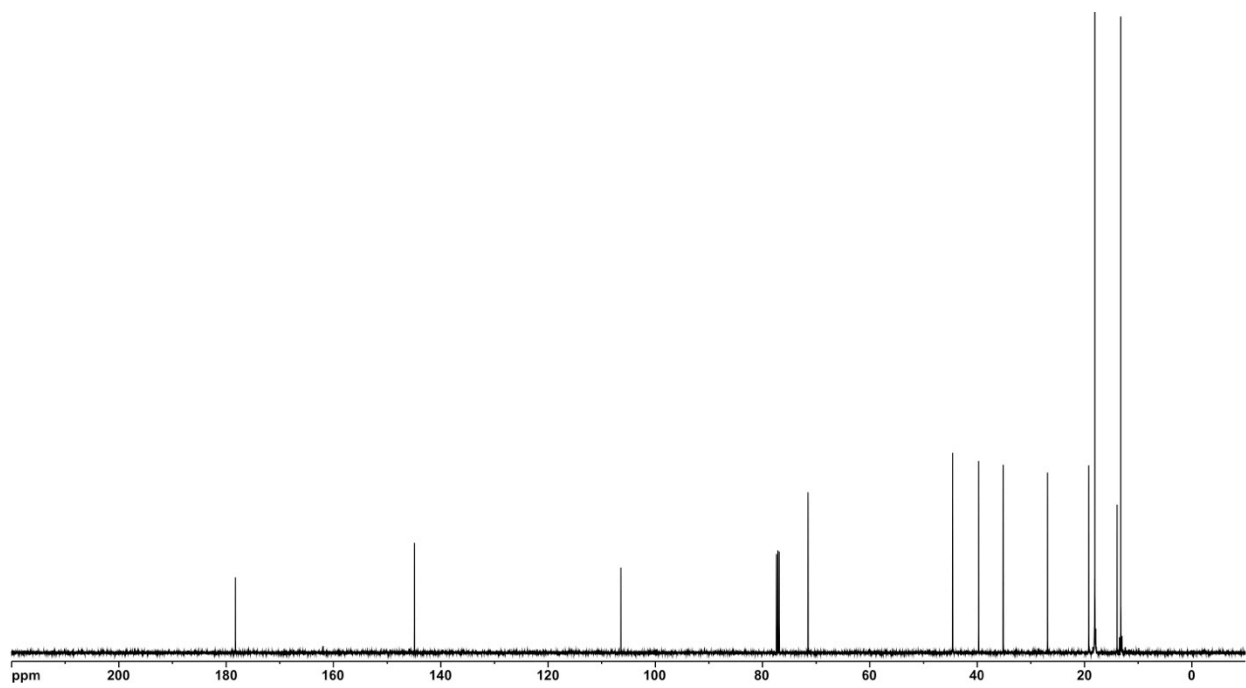

<sup>1</sup>H (500 MHz) and <sup>13</sup>C NMR (125 MHz) spectra of bicyclic  $\gamma$ -lactone (-)-**3g** in CDCl<sub>3</sub>

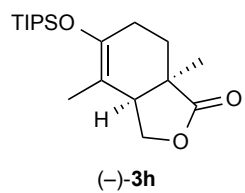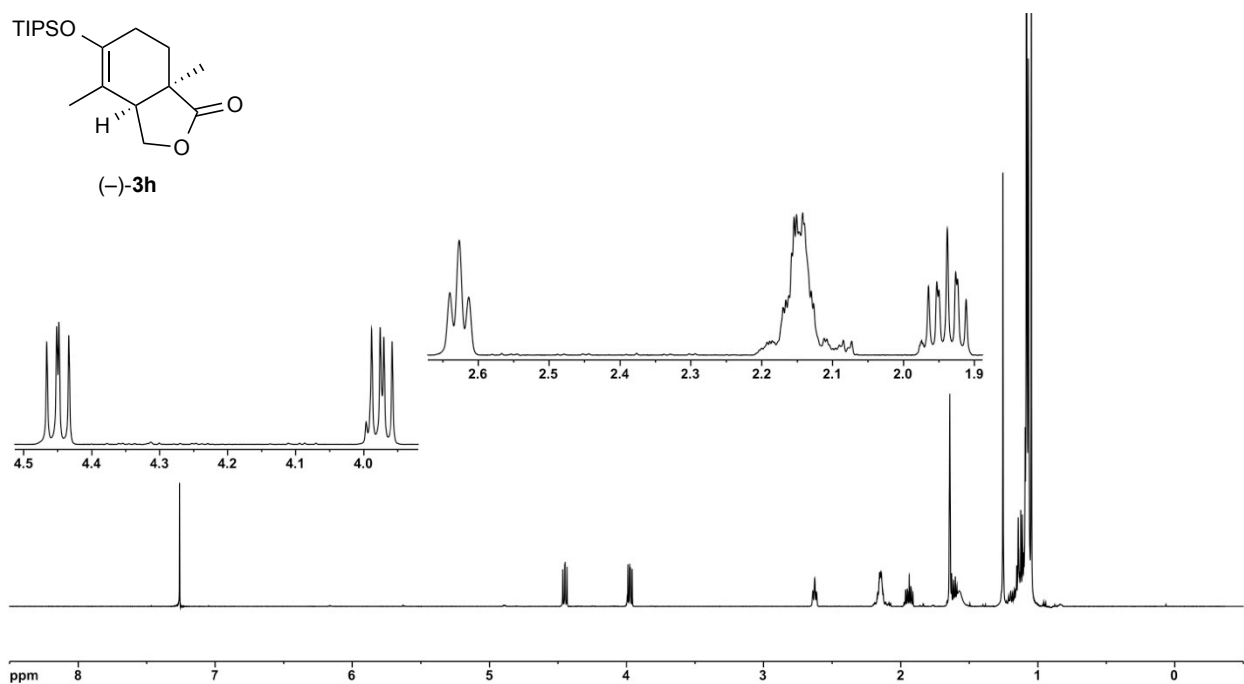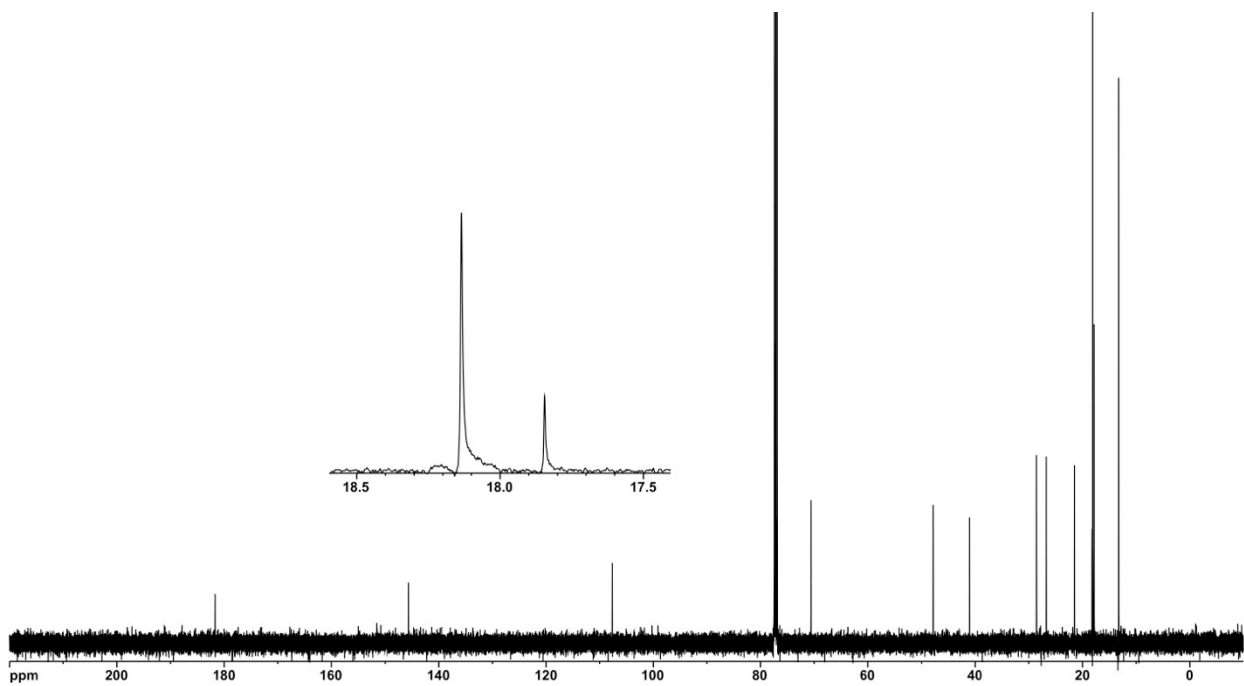

$^1\text{H}$  (500 MHz) and  $^{13}\text{C}$  NMR (125 MHz) spectra of bicyclic  $\gamma$ -lactone (-)-**3h** in  $\text{CDCl}_3$

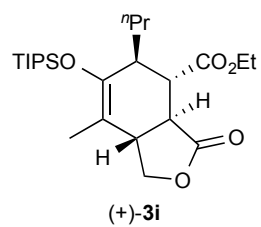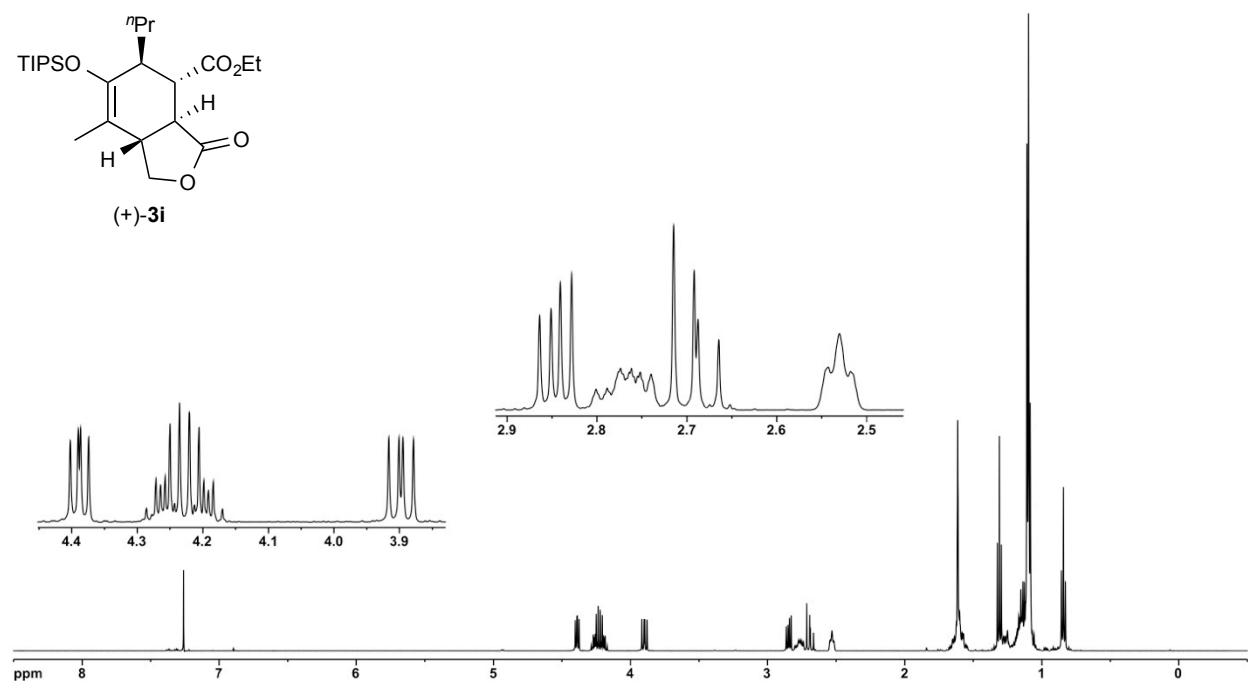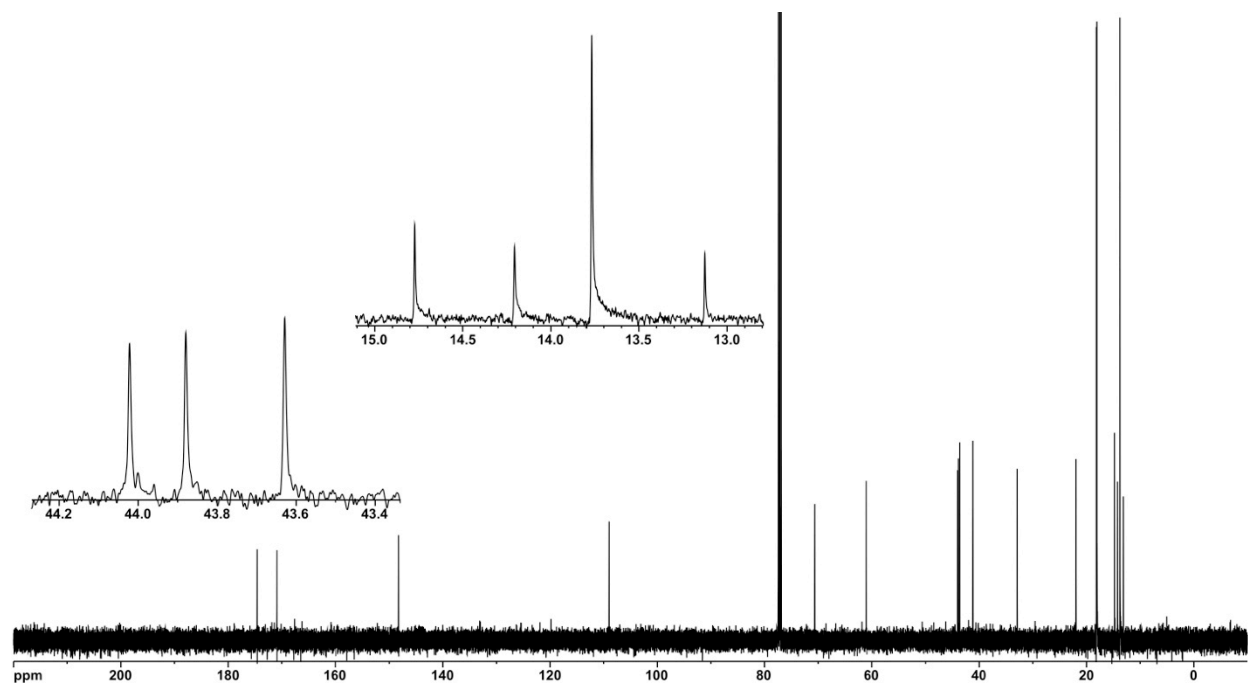

$^1\text{H}$  (500 MHz) and  $^{13}\text{C}$  NMR (125 MHz) spectra of bicyclic  $\gamma$ -lactone (+)-**3i** in  $\text{CDCl}_3$

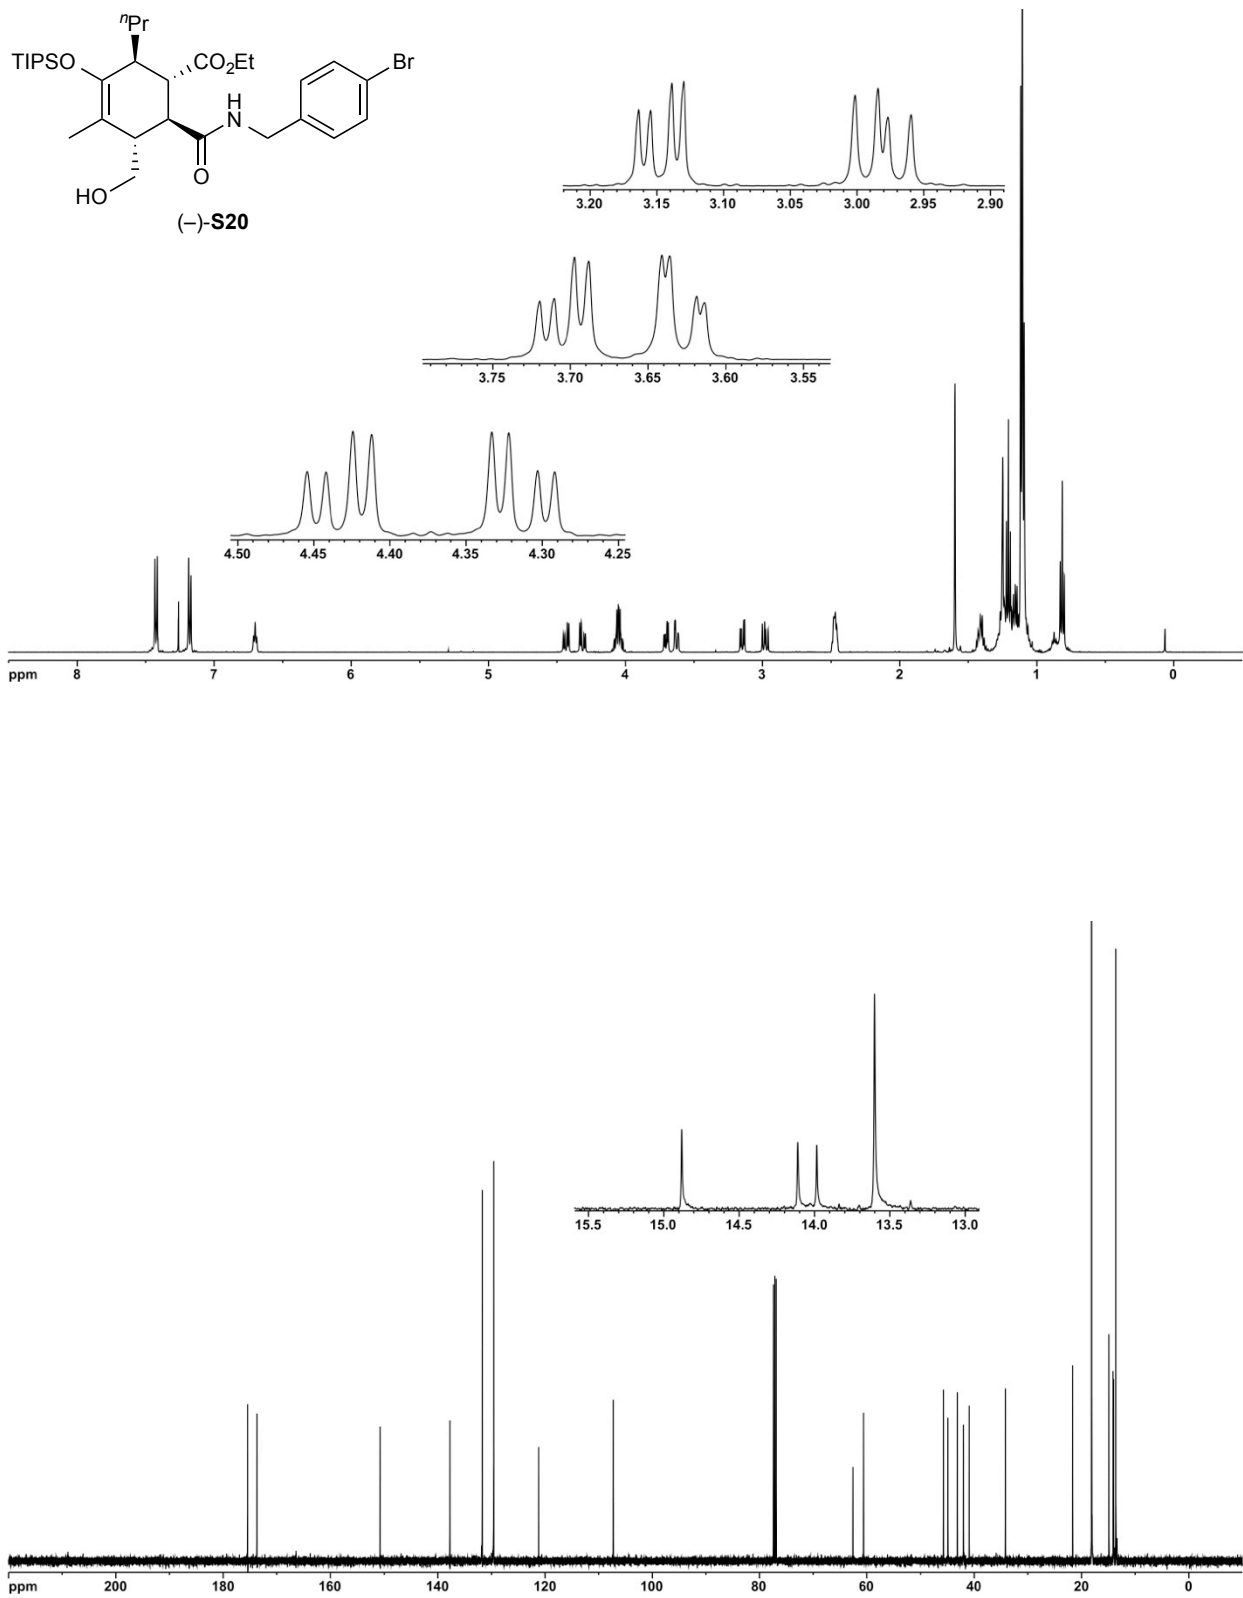

$^1\text{H}$  (500 MHz) and  $^{13}\text{C}$  NMR (125 MHz) spectra of amide (-)-**S20** in  $\text{CDCl}_3$

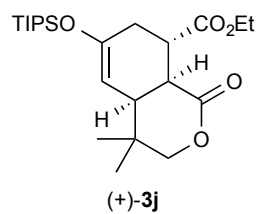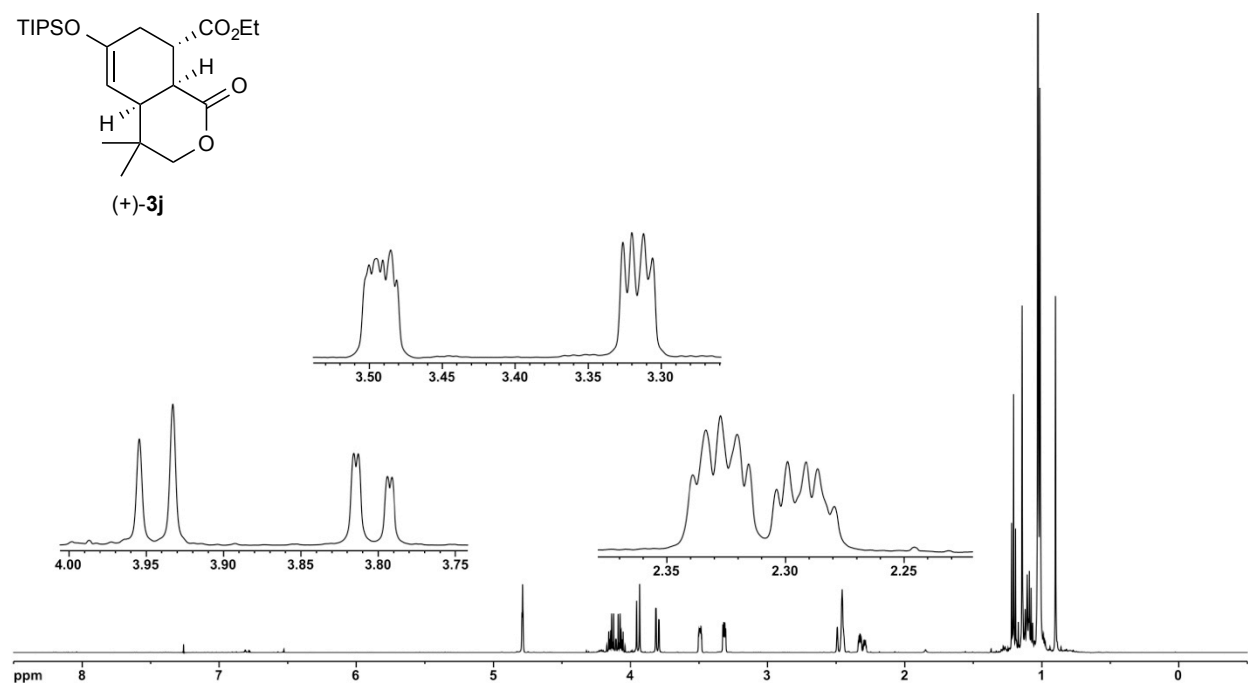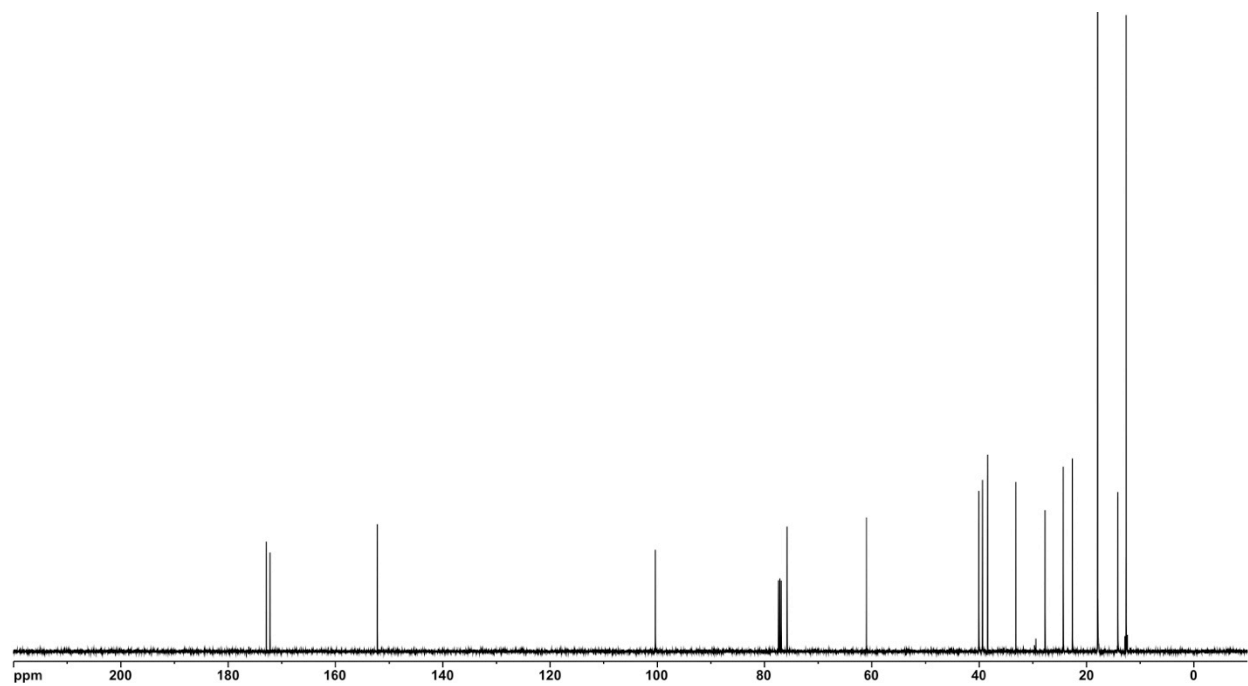

$^1\text{H}$  (500 MHz) and  $^{13}\text{C}$  NMR (125 MHz) spectra of bicyclic  $\delta$ -lactone (+)-**3j** in  $\text{CDCl}_3$

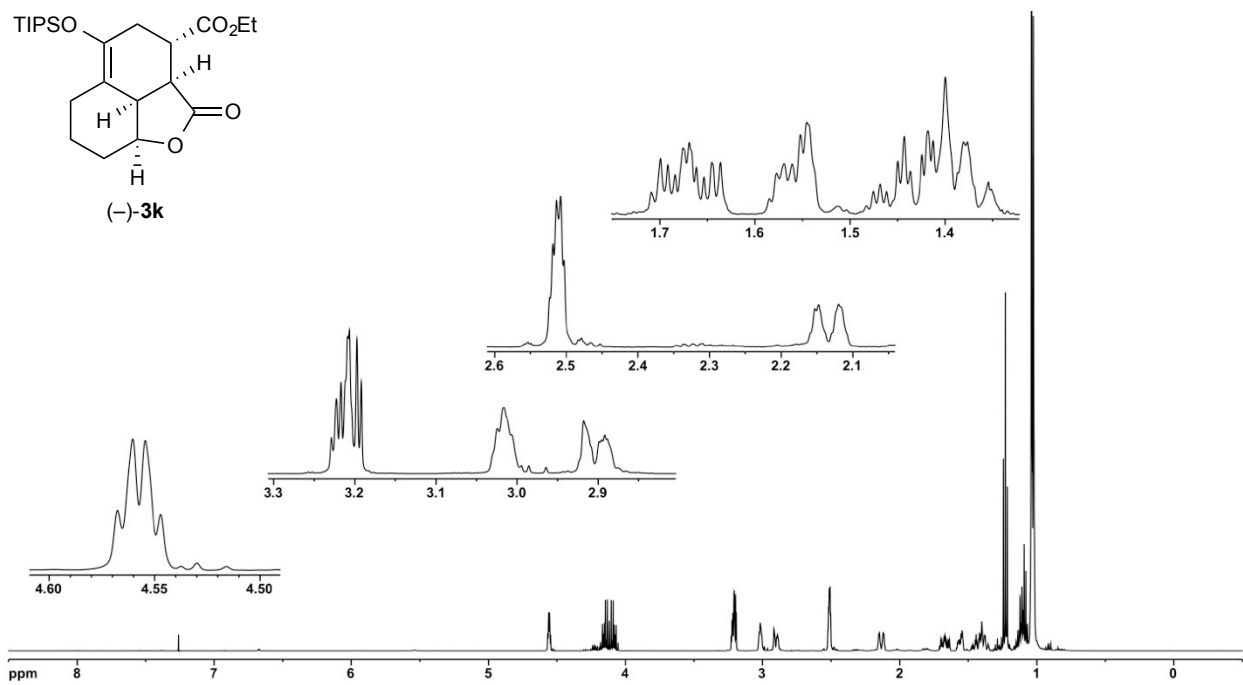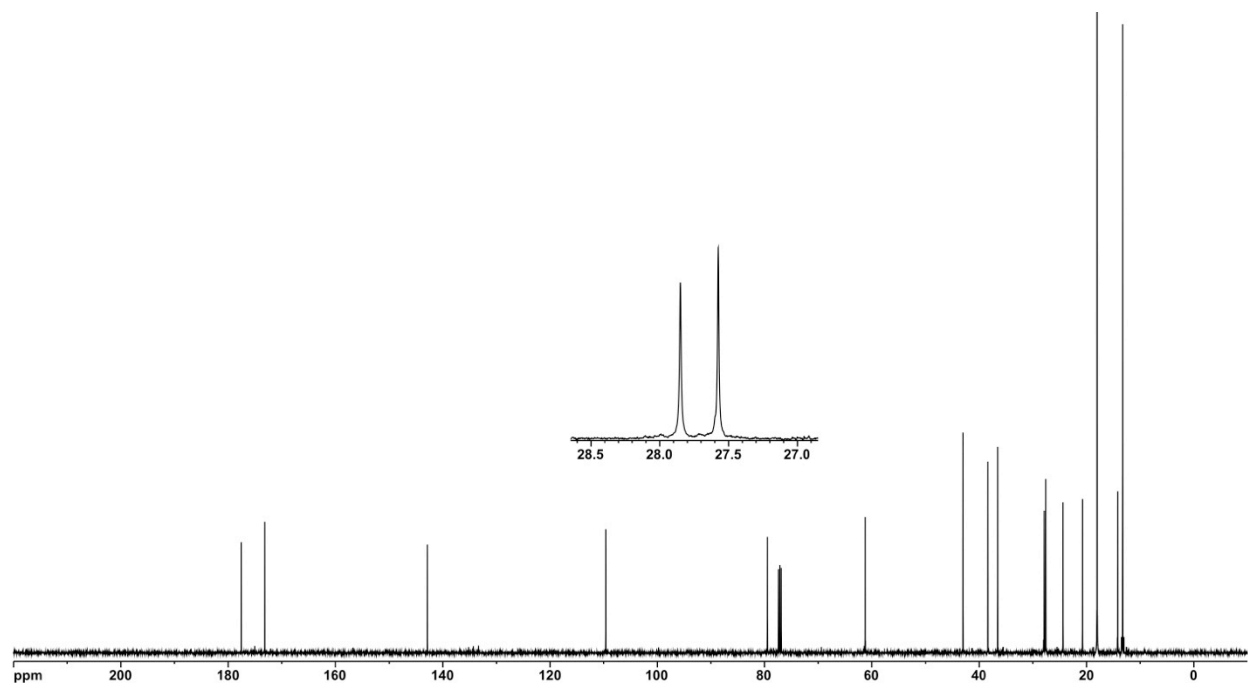

<sup>1</sup>H (500 MHz) and <sup>13</sup>C NMR (125 MHz) spectra of tricyclic  $\gamma$ -lactone (-)-**3k** in CDCl<sub>3</sub>

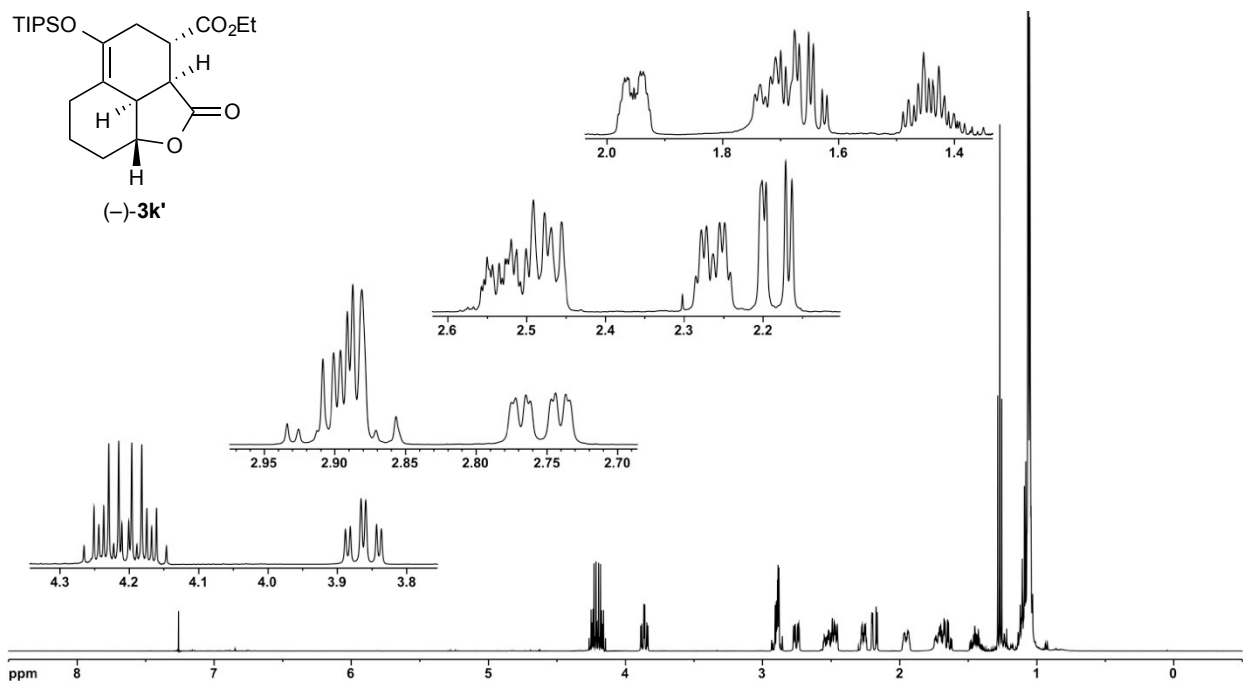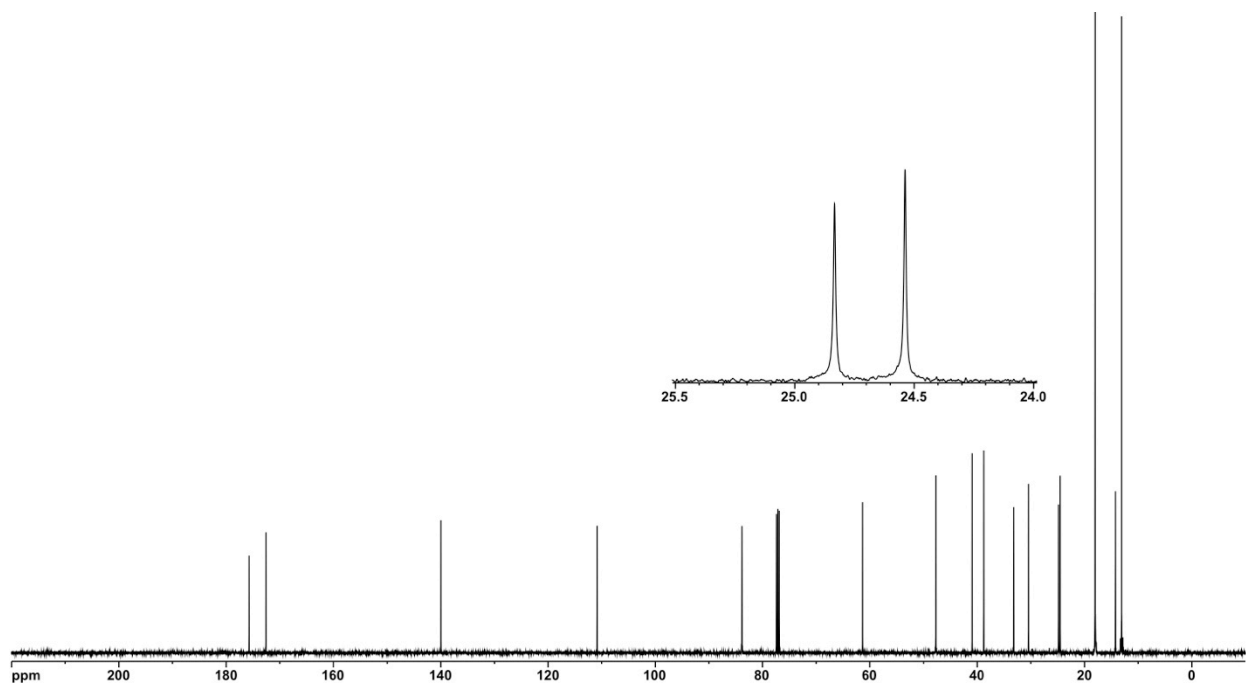

<sup>1</sup>H (500 MHz) and <sup>13</sup>C NMR (125 MHz) spectra of tricyclic  $\gamma$ -lactone (-)-**3k'** in CDCl<sub>3</sub>



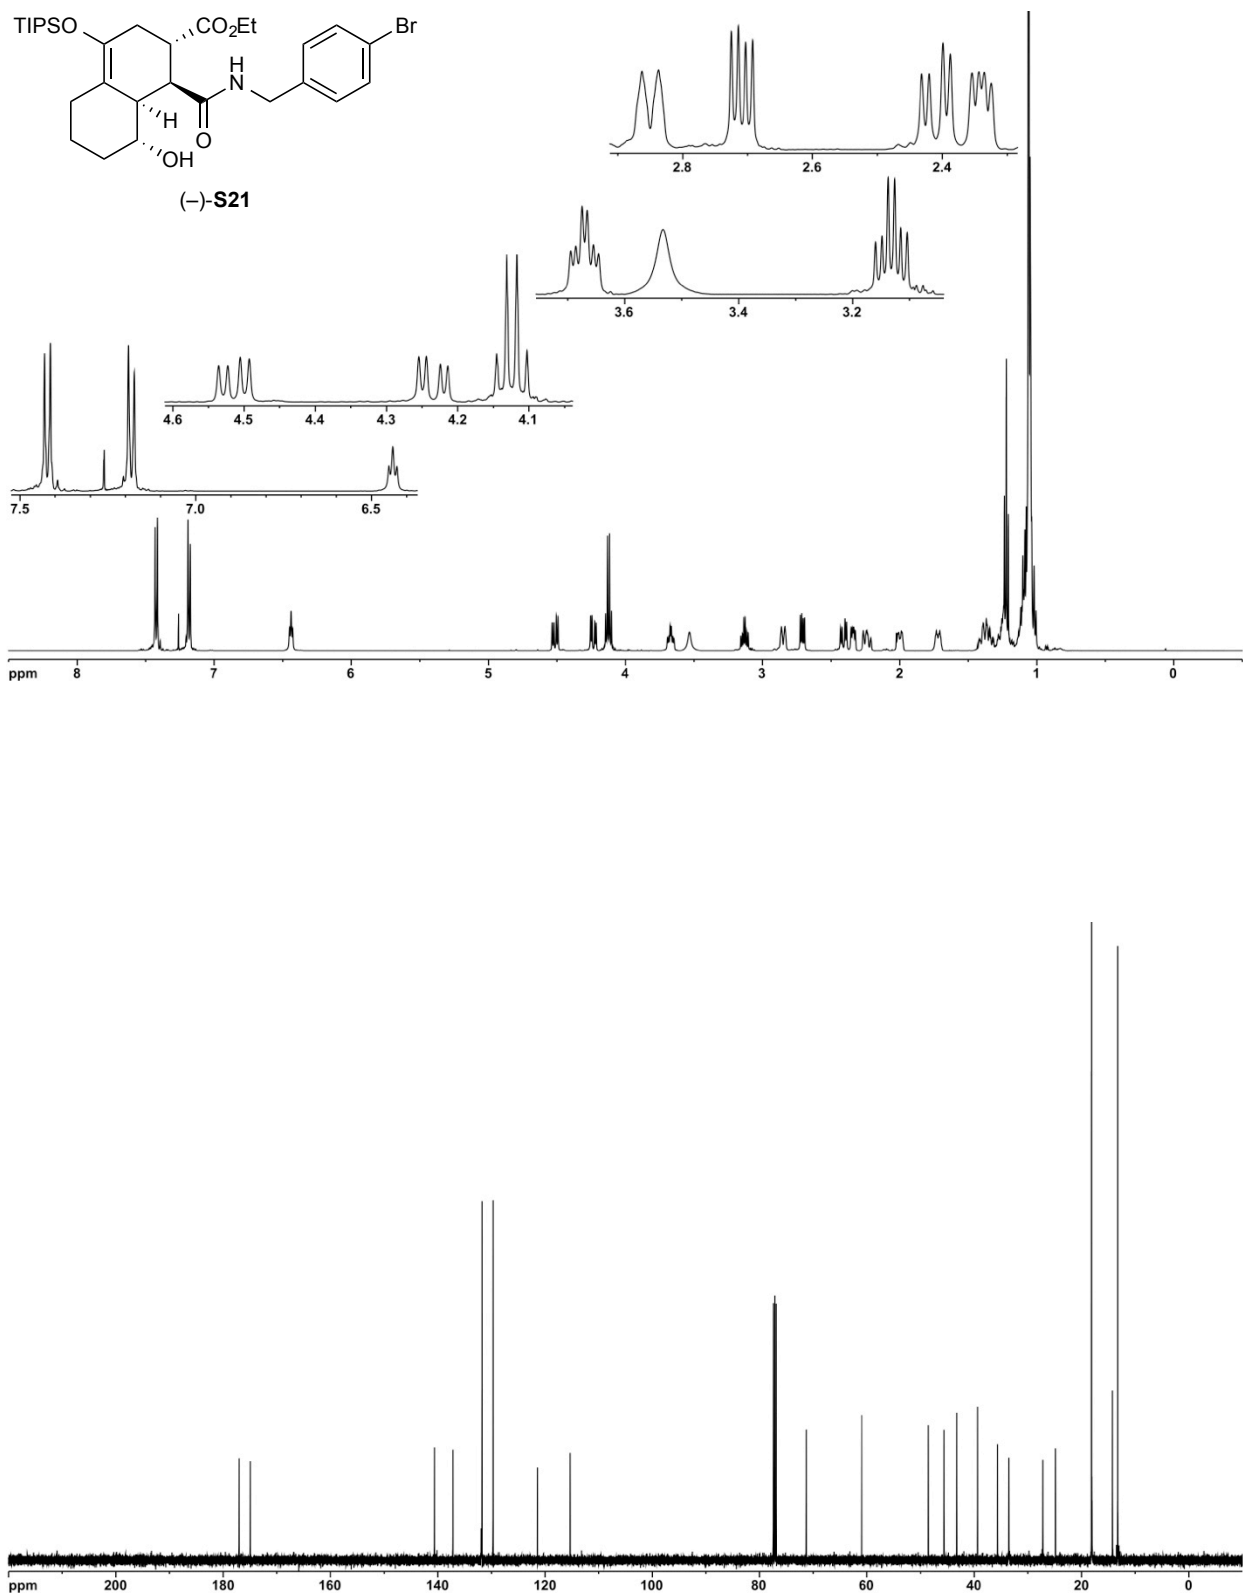

$^1\text{H}$  (500 MHz) and  $^{13}\text{C}$  NMR (125 MHz) spectra of bicyclic amide (-)-**S21** in CDCl<sub>3</sub>

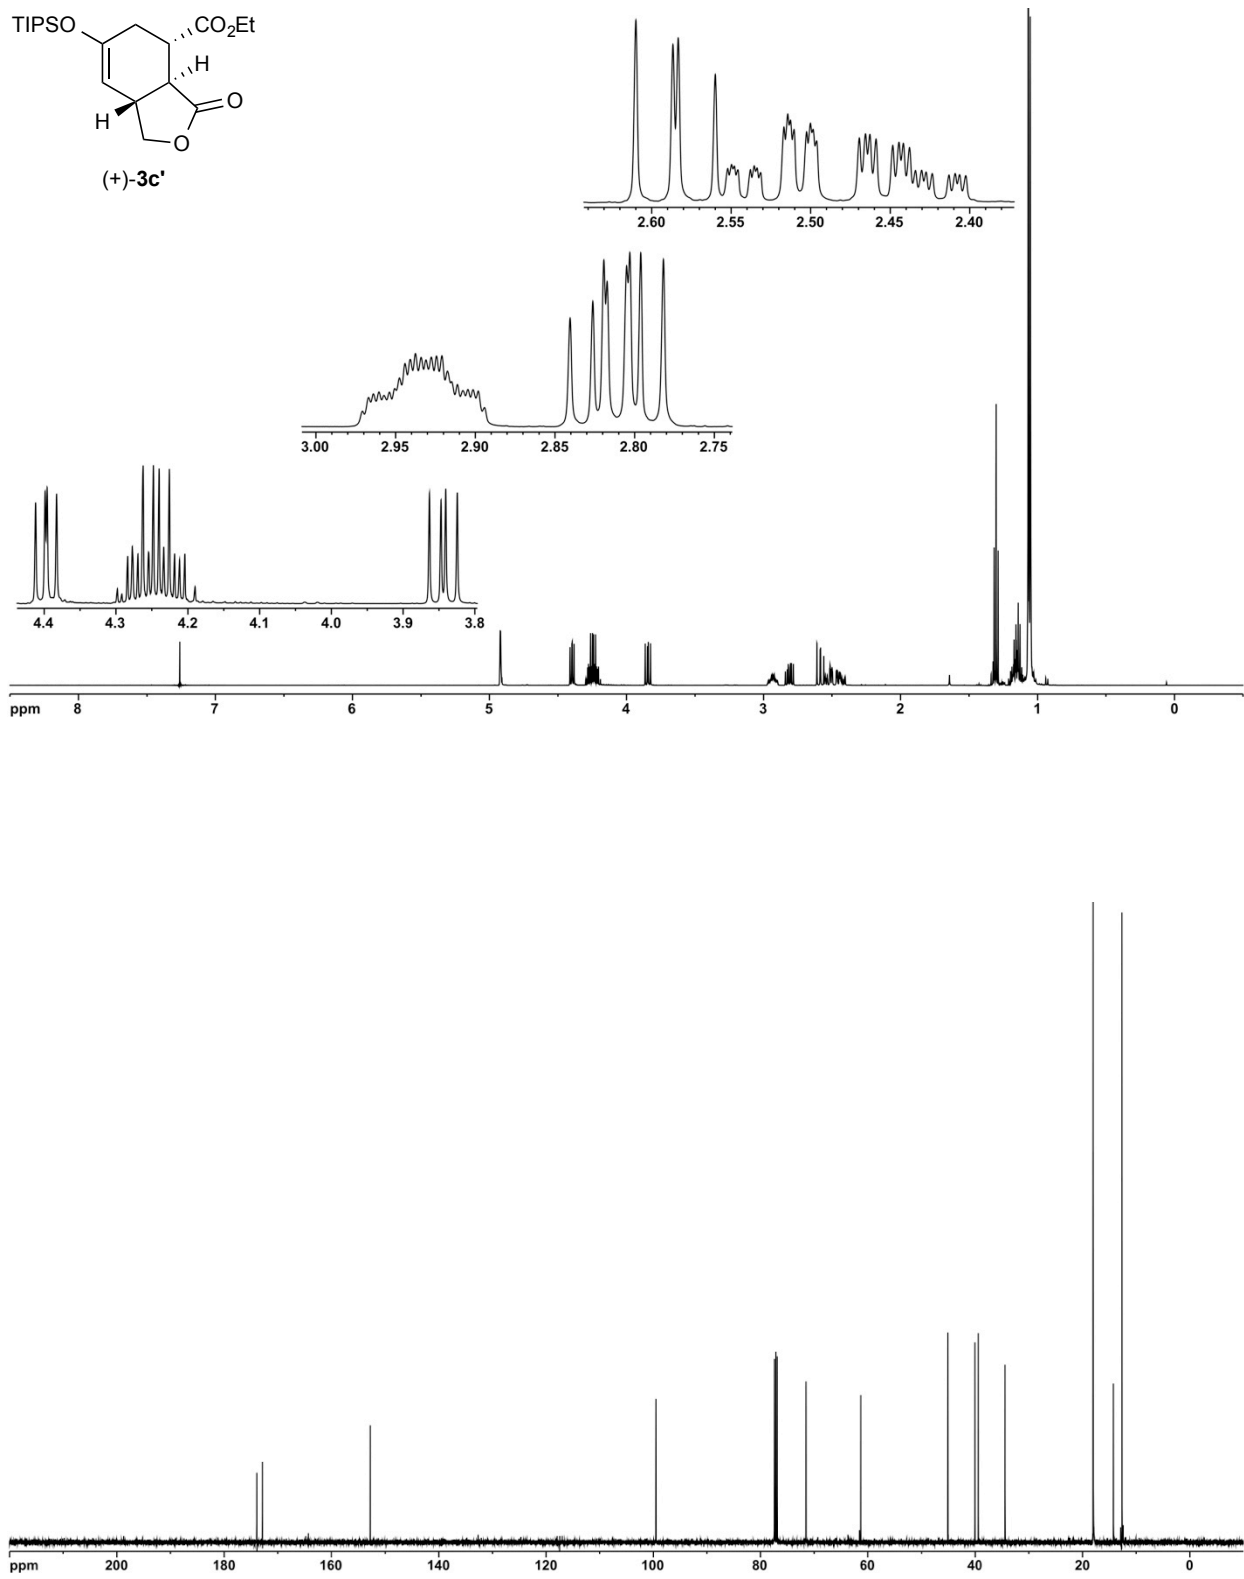

<sup>1</sup>H (500 MHz) and <sup>13</sup>C NMR (125 MHz) spectra of bicyclic γ-lactone (+)-**3c'** in CDCl<sub>3</sub>

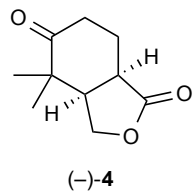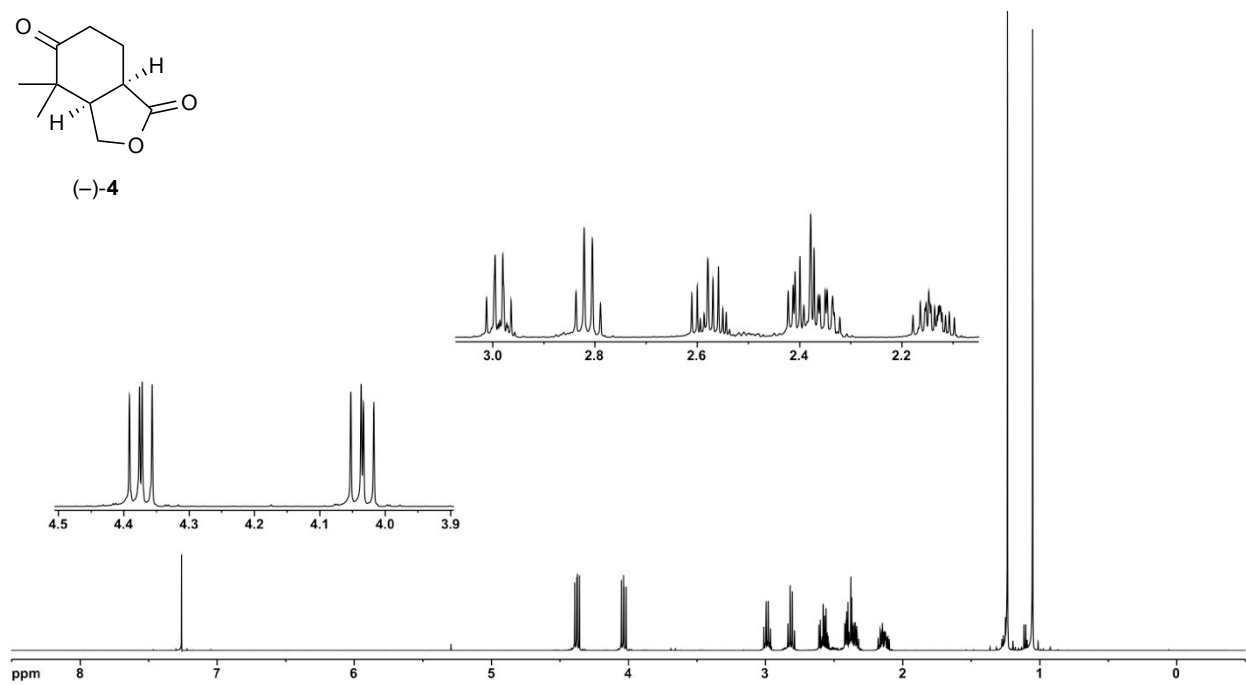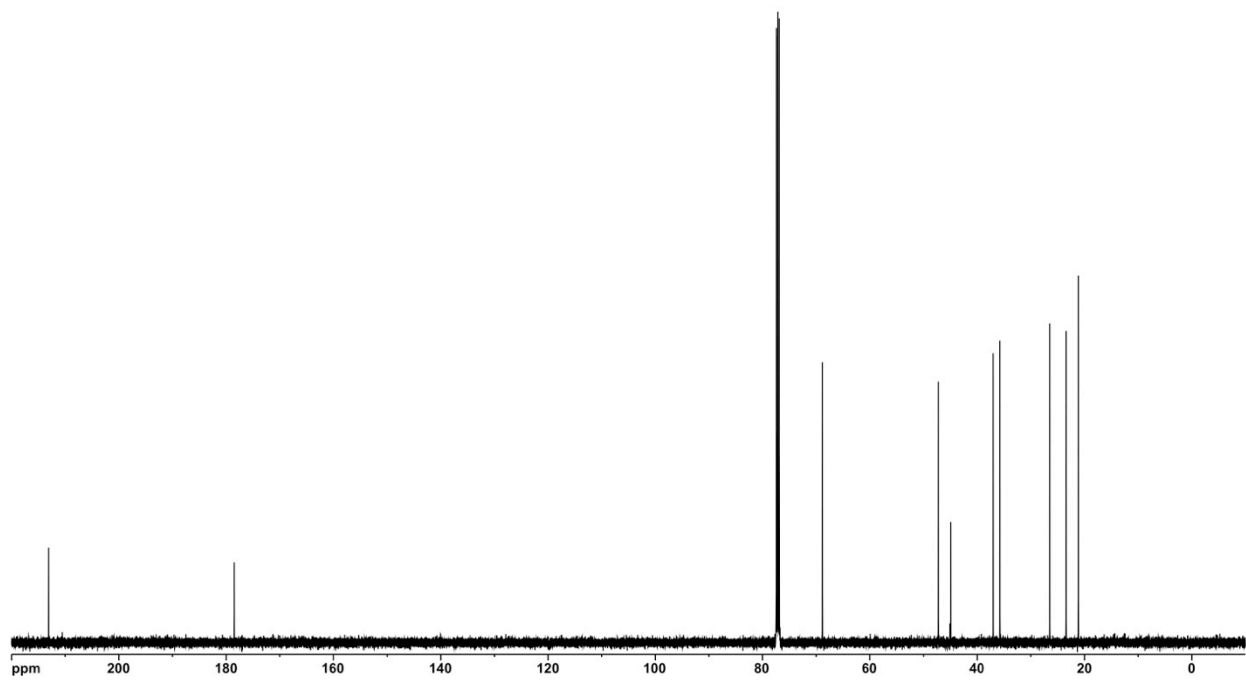

$^1\text{H}$  (500 MHz) and  $^{13}\text{C}$  NMR (125 MHz) spectra of  $\alpha,\alpha$ -dimethyl ketone (-)-**4** in  $\text{CDCl}_3$

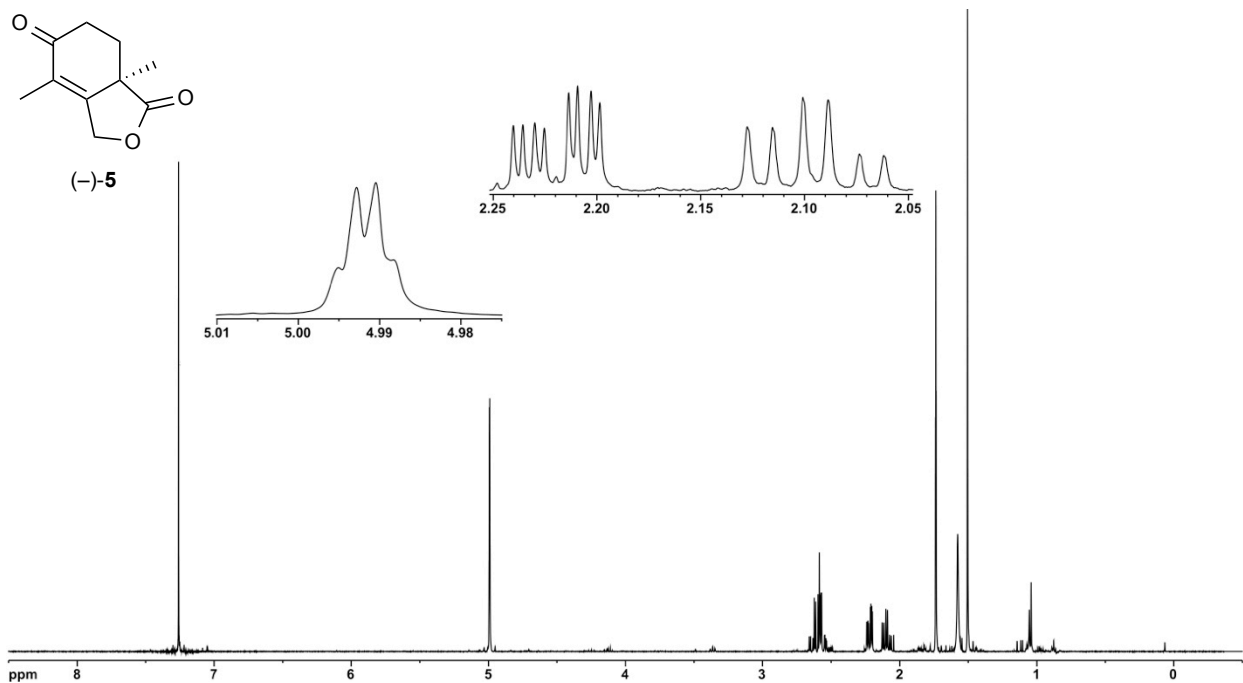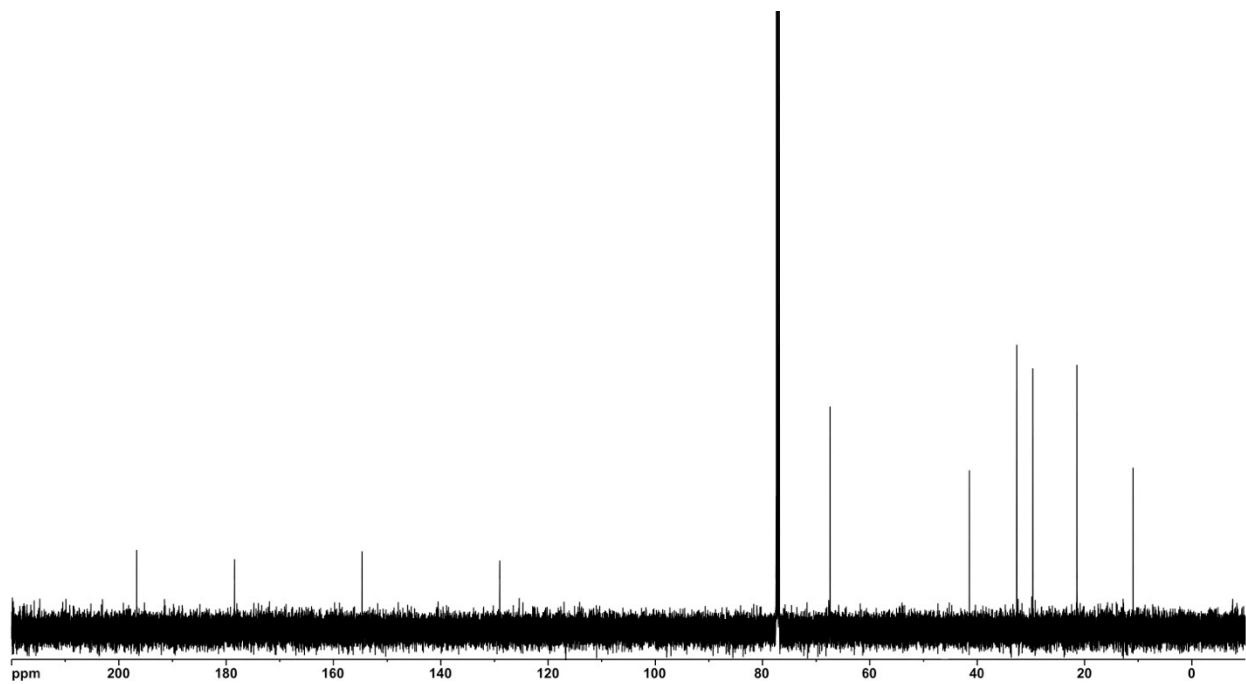

<sup>1</sup>H (500 MHz) and <sup>13</sup>C NMR (125 MHz) spectra of enone  $\gamma$ -lactone (-)-**5** in CDCl<sub>3</sub>

**Figure S12. Chiral HPLC determination of enantiomeric excess of bicyclic  $\gamma$ -lactones **3a** and **3a'**:**

**Chiral HPLC analysis of bicyclic  $\gamma$ -lactone **3a** and **3a'**:** Chiralcel OD-H column: hexanes:*i*PrOH = 95:05, flow rate 0.5 mL/min,  $\lambda$  = 210 nm:  $t_{\text{major}}$  = 10.3 min,  $t_{\text{minor}}$  = 10.9 min; 99% ee;  $t_{\text{minor}}$  = 12.7 min,  $t_{\text{major}}$  = 19.4 min; 99% ee.

**Table S1, entry 11:**

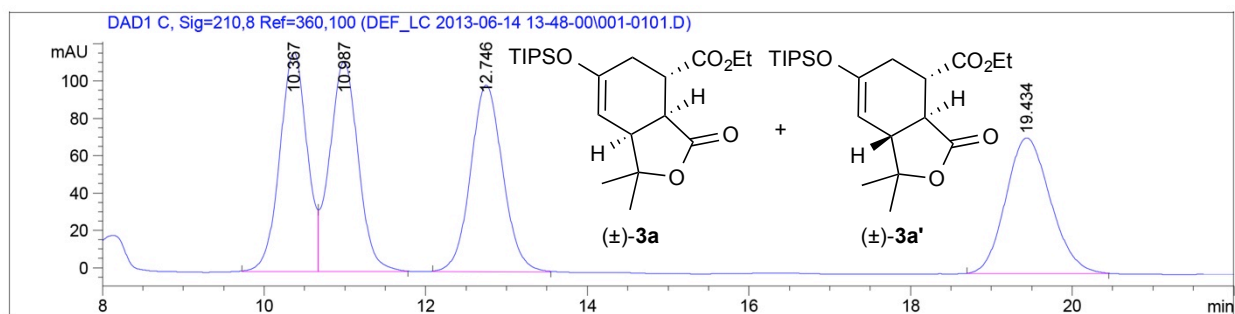

Signal 3: DAD1 C, Sig=210,8 Ref=360,100

| Peak # | RetTime [min] | Type | Width [min] | Area [mAU*s] | Height [mAU] | Area %  |
|--------|---------------|------|-------------|--------------|--------------|---------|
| 1      | 10.367        | BV   | 0.3620      | 2754.59033   | 117.28511    | 24.8423 |
| 2      | 10.987        | VB   | 0.3772      | 2763.33936   | 112.26688    | 24.9212 |
| 3      | 12.746        | BB   | 0.4276      | 2769.97803   | 99.87013     | 24.9811 |
| 4      | 19.434        | BB   | 0.5993      | 2800.39136   | 72.71989     | 25.2554 |

Totals : 1.10883e4 402.14201

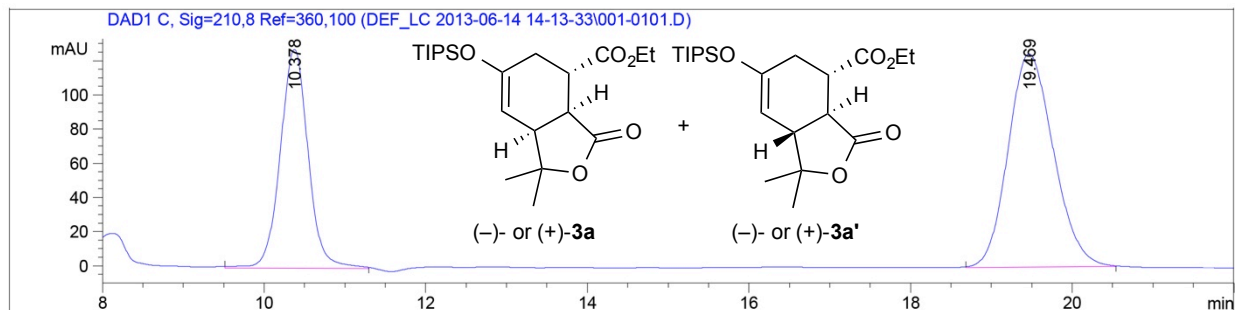

Signal 3: DAD1 C, Sig=210,8 Ref=360,100

| Peak # | RetTime [min] | Type | Width [min] | Area [mAU*s] | Height [mAU] | Area %  |
|--------|---------------|------|-------------|--------------|--------------|---------|
| 1      | 10.378        | MM   | 0.4019      | 3085.39746   | 127.96414    | 38.8161 |
| 2      | 19.469        | BB   | 0.6070      | 4863.35352   | 124.70683    | 61.1839 |

Totals : 7948.75098 252.67097

**Figure S13. Chiral HPLC determinations of enantiomeric excess of bicyclic lactones 3b-j:**

**Determination of enantiomeric excess of bicyclic  $\gamma$ -lactone (–)-3b:**

**Chiral HPLC analysis of bicyclic  $\gamma$ -lactone (–)-3b:** Chiralcel OD-H column: hexanes:*i*PrOH = 98:02, flow rate 0.5 mL/min,  $\lambda$  = 210 nm:  $t_{\text{major}}$  = 15.9 min,  $t_{\text{minor}}$  = 17.9 min; 94% ee.

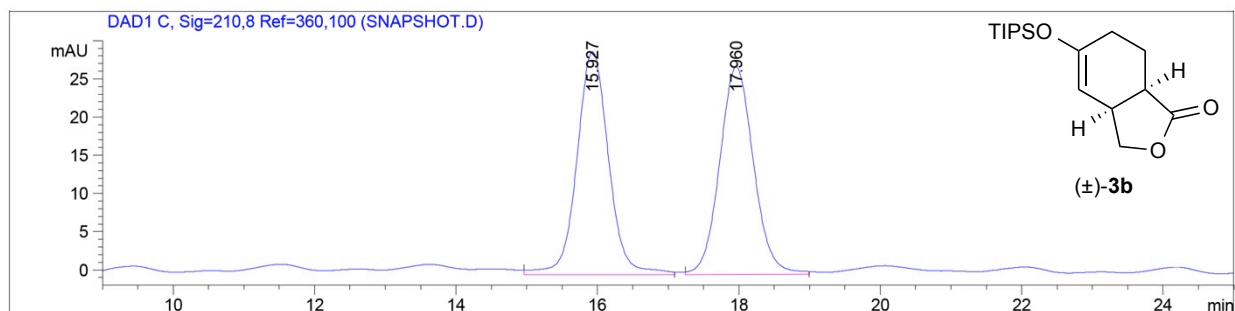

Signal 3: DAD1 C, Sig=210,8 Ref=360,100

| Peak # | RetTime [min] | Type | Width [min] | Area [mAU*s] | Height [mAU] | Area %  |
|--------|---------------|------|-------------|--------------|--------------|---------|
| 1      | 15.927        | VB   | 0.4815      | 914.27545    | 29.18653     | 50.2026 |
| 2      | 17.960        | BB   | 0.5175      | 906.89441    | 27.16312     | 49.7974 |

Totals : 1821.16986 56.34965

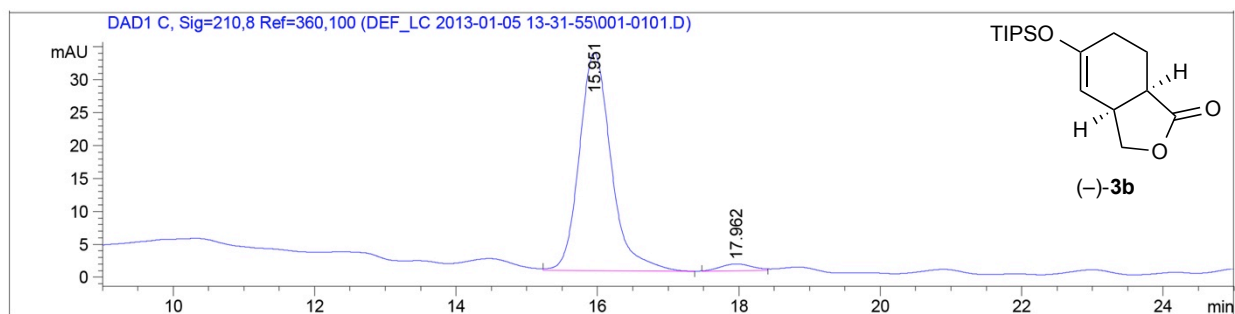

Signal 3: DAD1 C, Sig=210,8 Ref=360,100

| Peak # | RetTime [min] | Type | Width [min] | Area [mAU*s] | Height [mAU] | Area %  |
|--------|---------------|------|-------------|--------------|--------------|---------|
| 1      | 15.951        | MM   | 0.5203      | 1032.26636   | 33.06614     | 97.0640 |
| 2      | 17.962        | MM   | 0.5113      | 31.22353     | 1.01772      | 2.9360  |

Totals : 1063.48989 34.08386

## Determination of enantiomeric excess of bicyclic $\gamma$ -lactone (–)-3c:

**Chiral HPLC analysis of bicyclic  $\gamma$ -lactone (–)-3c:** Chiralcel OD-H column: hexanes:*i*PrOH = 95:05, flow rate 0.5 mL/min,  $\lambda$  = 210 nm:  $t_{\text{minor}}$  = 15.4 min,  $t_{\text{major}}$  = 18.1 min; 99% ee (using 20 mol% (S)-(–)-BTM), 98% ee (using 10 mol% (S)-(–)-BTM).

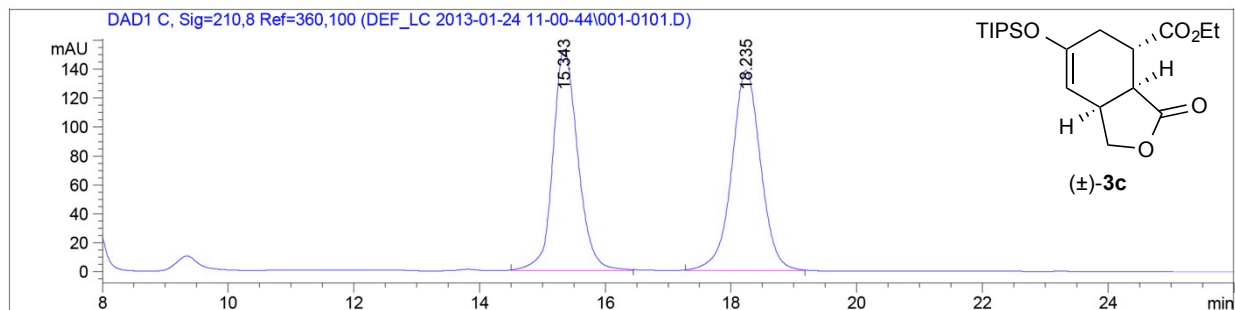

Signal 3: DAD1 C, Sig=210,8 Ref=360,100

| Peak # | RetTime [min] | Type | Width [min] | Area [mAU*s] | Height [mAU] | Area %  |
|--------|---------------|------|-------------|--------------|--------------|---------|
| 1      | 15.343        | MM   | 0.4858      | 4449.61182   | 152.66600    | 50.1120 |
| 2      | 18.235        | BB   | 0.4896      | 4429.72021   | 138.32141    | 49.8880 |

Totals : 8879.33203 290.98741

## Using 20 mol% (S)-(–)-BTM:

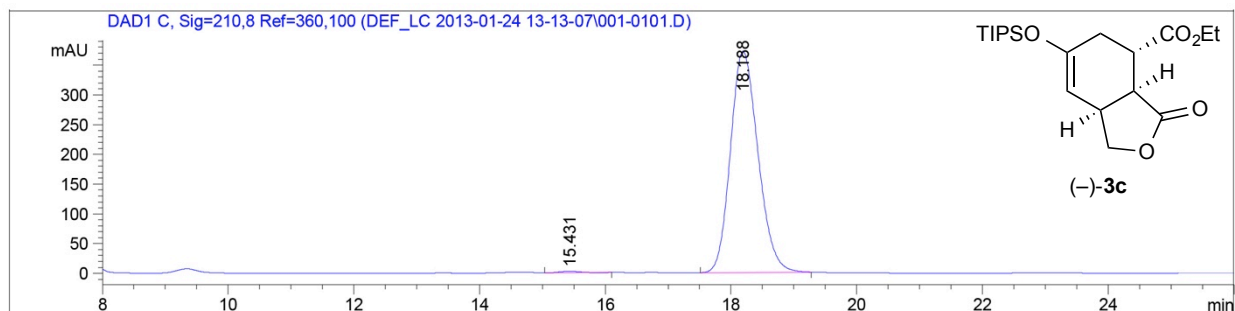

Signal 3: DAD1 C, Sig=210,8 Ref=360,100

| Peak # | RetTime [min] | Type | Width [min] | Area [mAU*s] | Height [mAU] | Area %  |
|--------|---------------|------|-------------|--------------|--------------|---------|
| 1      | 15.431        | BB   | 0.3303      | 52.56739     | 2.53123      | 0.4602  |
| 2      | 18.188        | BB   | 0.4743      | 1.13713e4    | 372.35049    | 99.5398 |

Totals : 1.14239e4 374.88173

**Using 10 mol% (S)-(-)-BTM:**

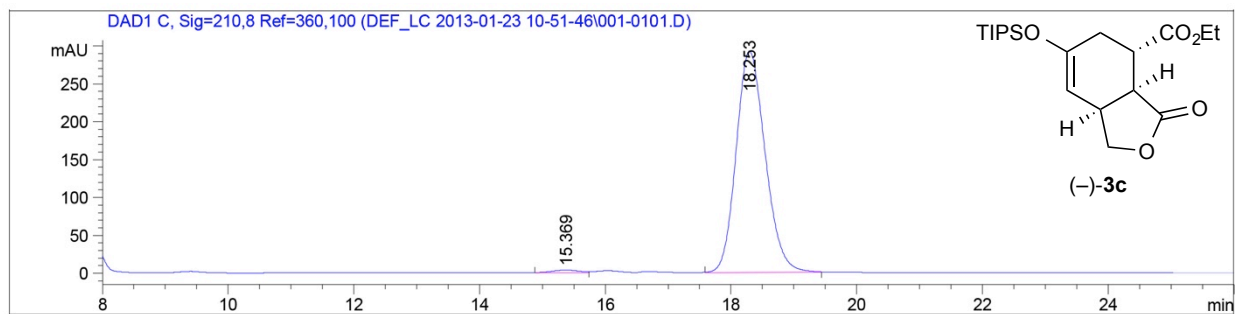

Signal 3: DAD1 C, Sig=210,8 Ref=360,100

| Peak # | RetTime [min] | Type | Width [min] | Area [mAU*s] | Height [mAU] | Area %  |
|--------|---------------|------|-------------|--------------|--------------|---------|
| 1      | 15.369        | BV   | 0.4333      | 99.30708     | 3.37506      | 1.0494  |
| 2      | 18.253        | BB   | 0.4961      | 9363.54004   | 292.00168    | 98.9506 |

Totals : 9462.84712 295.37674



## Determination of enantiomeric excess of bicyclic $\gamma$ -lactone (–)-3d:

**Chiral HPLC analysis of bicyclic  $\gamma$ -lactone (–)-3d:** Chiralcel AS-H column: hexanes:<sup>i</sup>PrOH = 99:01, flow rate 1.0 mL/min,  $\lambda$  = 210 nm:  $t_{\text{major}}$  = 10.3 min,  $t_{\text{minor}}$  = 11.5 min; 99% ee.

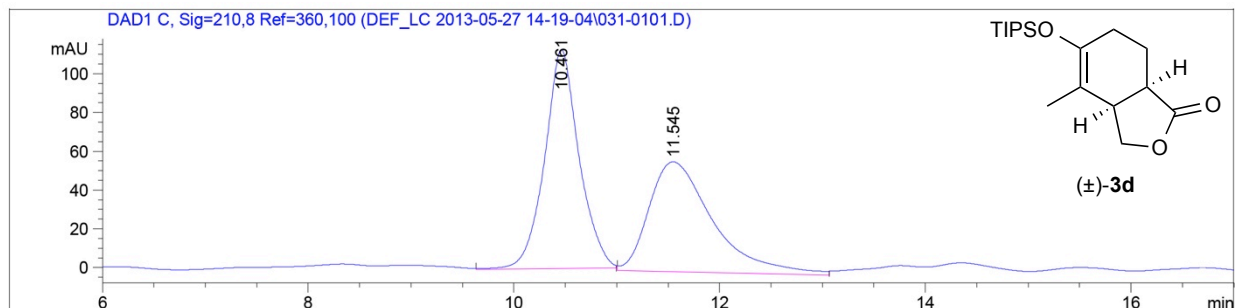

Signal 3: DAD1 C, Sig=210,8 Ref=360,100

| Peak # | RetTime [min] | Type | Width [min] | Area [mAU*s] | Height [mAU] | Area %  |
|--------|---------------|------|-------------|--------------|--------------|---------|
| 1      | 10.461        | MM   | 0.3872      | 2622.94019   | 112.89551    | 51.7560 |
| 2      | 11.545        | MM   | 0.7187      | 2444.95142   | 56.69883     | 48.2440 |

Totals : 5067.89160 169.59433

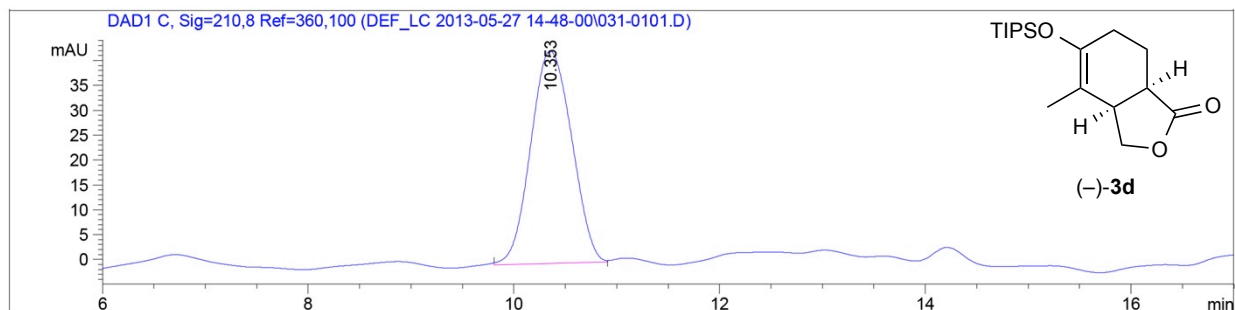

Signal 3: DAD1 C, Sig=210,8 Ref=360,100

| Peak # | RetTime [min] | Type | Width [min] | Area [mAU*s] | Height [mAU] | Area %   |
|--------|---------------|------|-------------|--------------|--------------|----------|
| 1      | 10.353        | BV   | 0.4441      | 1179.79602   | 42.73602     | 100.0000 |

Totals : 1179.79602 42.73602

## Determination of enantiomeric excess of bicyclic $\gamma$ -lactone (–)-3e:

**Chiral HPLC analysis of bicyclic  $\gamma$ -lactone (–)-3e:** Chiralcel OD-H column: hexanes:<sup>i</sup>PrOH = 98:02, flow rate 0.4 mL/min,  $\lambda$  = 210 nm:  $t_{\text{major}}$  = 20.0 min,  $t_{\text{minor}}$  = 21.3 min; 99% ee.

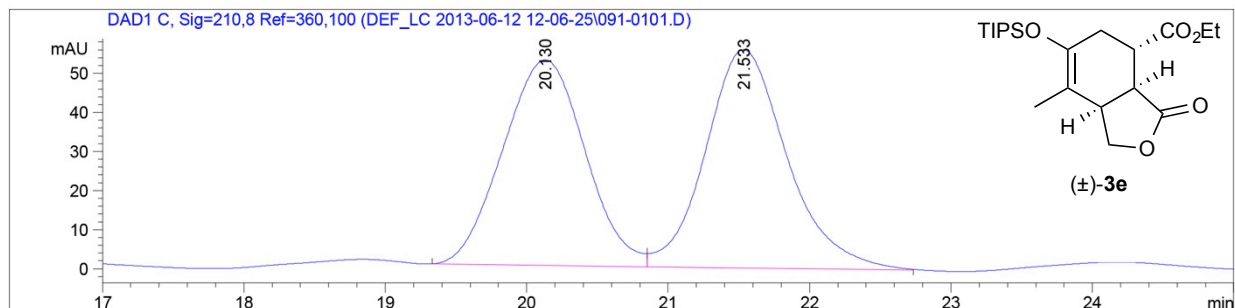

Signal 3: DAD1 C, Sig=210,8 Ref=360,100

| Peak # | RetTime [min] | Type | Width [min] | Area [mAU*s] | Height [mAU] | Area %  |
|--------|---------------|------|-------------|--------------|--------------|---------|
| 1      | 20.130        | BV   | 0.6185      | 2121.67554   | 52.60606     | 48.6533 |
| 2      | 21.533        | VB   | 0.6094      | 2239.12891   | 55.88930     | 51.3467 |

Totals : 4360.80444 108.49536

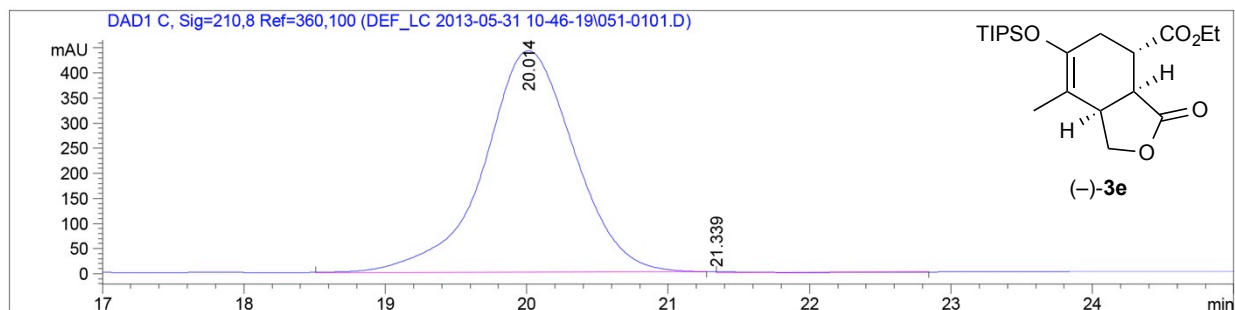

Signal 3: DAD1 C, Sig=210,8 Ref=360,100

| Peak # | RetTime [min] | Type | Width [min] | Area [mAU*s] | Height [mAU] | Area %  |
|--------|---------------|------|-------------|--------------|--------------|---------|
| 1      | 20.014        | BB   | 0.6478      | 1.96563e4    | 441.19595    | 99.8988 |
| 2      | 21.339        | MM   | 0.1555      | 19.91752     | 1.55744      | 0.1012  |

Totals : 1.96762e4 442.75339

## Determination of enantiomeric excess of bicyclic $\gamma$ -lactone (–)-3f:

**Chiral HPLC analysis of bicyclic  $\gamma$ -lactone (–)-3f:** Chiralcel OD-H column: hexanes:*i*PrOH = 95:05, flow rate 0.5 mL/min,  $\lambda$  = 210 nm:  $t_{\text{major}}$  = 11.6 min,  $t_{\text{minor}}$  = 13.6 min; 98% ee.

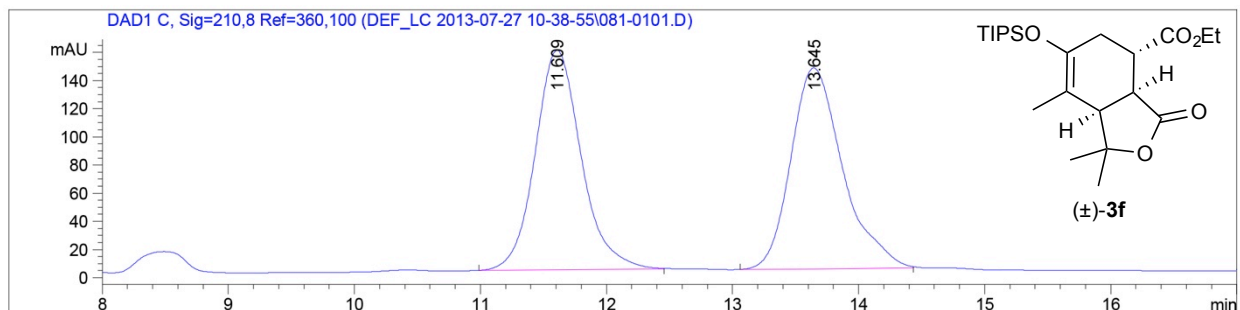

Signal 3: DAD1 C, Sig=210,8 Ref=360,100

| Peak # | RetTime [min] | Type | Width [min] | Area [mAU*s] | Height [mAU] | Area %  |
|--------|---------------|------|-------------|--------------|--------------|---------|
| 1      | 11.609        | BB   | 0.3884      | 3964.71484   | 156.04489    | 50.1639 |
| 2      | 13.645        | BV   | 0.4256      | 3938.81152   | 142.89645    | 49.8361 |

Totals : 7903.52637 298.94135

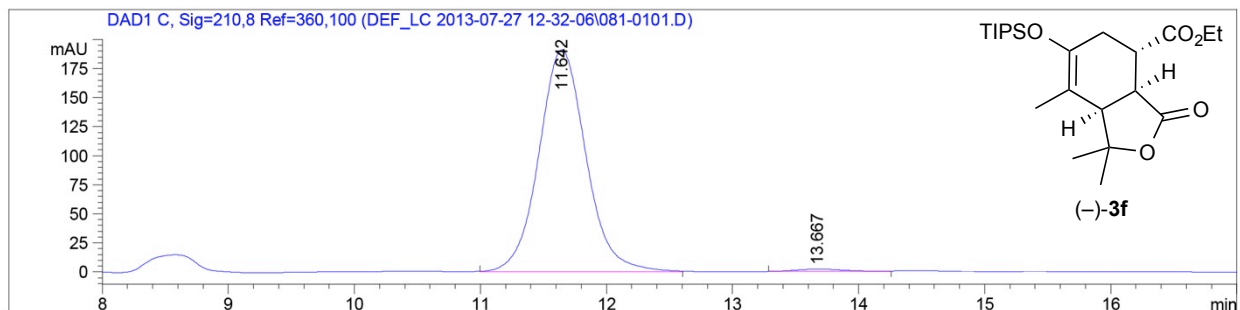

Signal 3: DAD1 C, Sig=210,8 Ref=360,100

| Peak # | RetTime [min] | Type | Width [min] | Area [mAU*s] | Height [mAU] | Area %  |
|--------|---------------|------|-------------|--------------|--------------|---------|
| 1      | 11.642        | BB   | 0.3965      | 4945.87793   | 190.72485    | 99.0991 |
| 2      | 13.667        | BB   | 0.2957      | 44.95997     | 1.87553      | 0.9009  |

Totals : 4990.83790 192.60038

## Determination of enantiomeric excess of bicyclic $\gamma$ -lactone (+)-3f:

**Chiral HPLC analysis of bicyclic  $\gamma$ -lactone (+)-3f:** Chiralcel OD-H column: hexanes:*i*PrOH = 95:05, flow rate 0.5 mL/min,  $\lambda$  = 210 nm:  $t_{\text{minor}}$  = 11.4 min,  $t_{\text{major}}$  = 13.5 min; 96% ee.

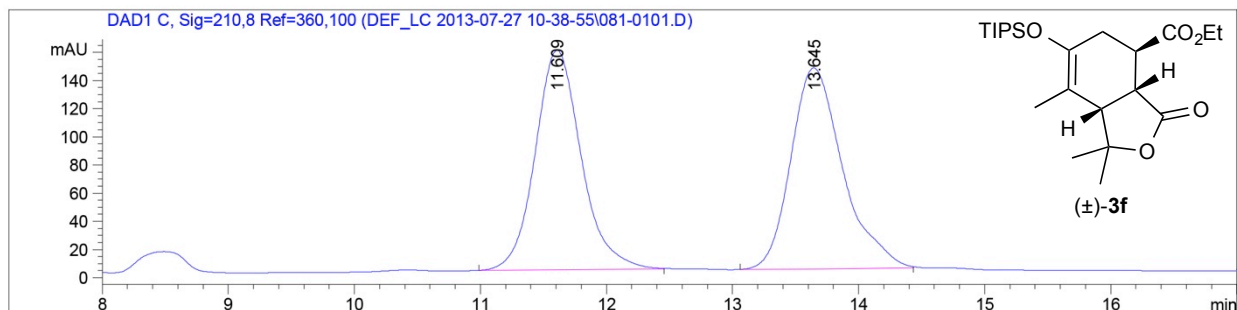

Signal 3: DAD1 C, Sig=210,8 Ref=360,100

| Peak # | RetTime [min] | Type | Width [min] | Area [mAU*s] | Height [mAU] | Area %  |
|--------|---------------|------|-------------|--------------|--------------|---------|
| 1      | 11.609        | BB   | 0.3884      | 3964.71484   | 156.04489    | 50.1639 |
| 2      | 13.645        | BV   | 0.4256      | 3938.81152   | 142.89645    | 49.8361 |

Totals : 7903.52637 298.94135

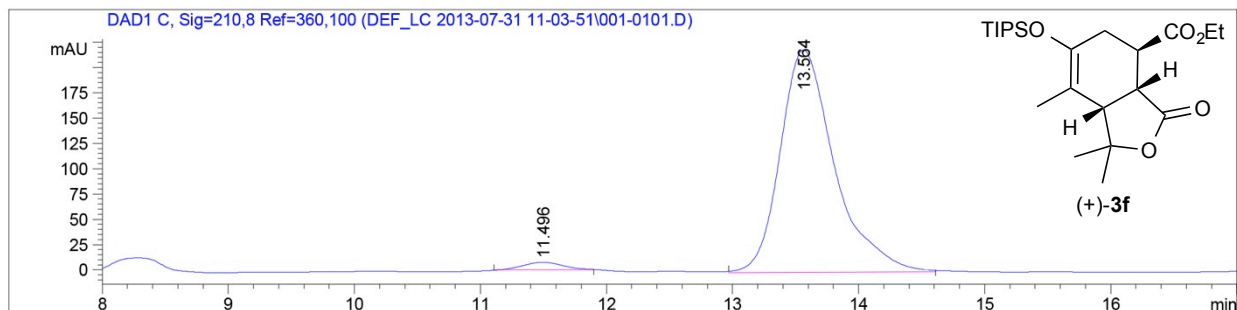

Signal 3: DAD1 C, Sig=210,8 Ref=360,100

| Peak # | RetTime [min] | Type | Width [min] | Area [mAU*s] | Height [mAU] | Area %  |
|--------|---------------|------|-------------|--------------|--------------|---------|
| 1      | 11.496        | MM   | 0.3682      | 165.08434    | 7.47177      | 2.1938  |
| 2      | 13.564        | MM   | 0.5582      | 7359.91846   | 219.76448    | 97.8062 |

Totals : 7525.00279 227.23625

## Determination of enantiomeric excess of bicyclic $\gamma$ -lactone (–)-3g:

**Chiral HPLC analysis of bicyclic  $\gamma$ -lactone (–)-3g:** Chiralcel OD-H column: hexanes:<sup>i</sup>PrOH = 98:02, flow rate 0.5 mL/min,  $\lambda$  = 210 nm:  $t_{\text{minor}}$  = 16.0 min,  $t_{\text{major}}$  = 17.0 min; 95% ee.

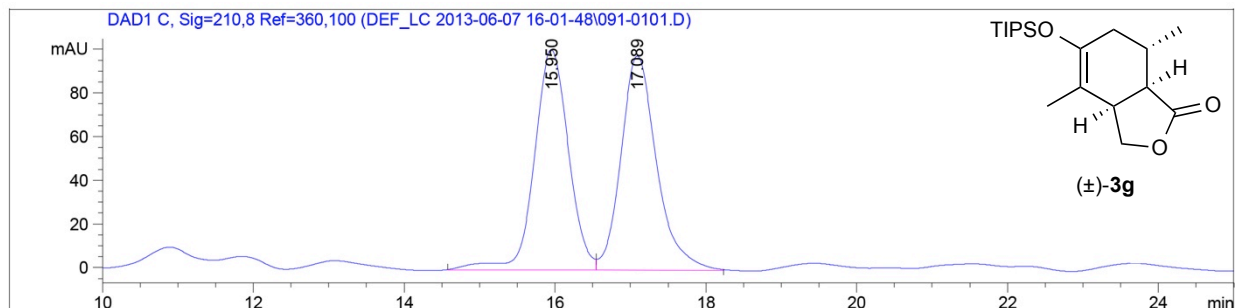

Signal 3: DAD1 C, Sig=210,8 Ref=360,100

| Peak # | RetTime [min] | Type | Width [min] | Area [mAU*s] | Height [mAU] | Area %  |
|--------|---------------|------|-------------|--------------|--------------|---------|
| 1      | 15.950        | BV   | 0.4880      | 3186.13794   | 101.00188    | 49.7150 |
| 2      | 17.089        | VB   | 0.5011      | 3222.66260   | 98.14114     | 50.2850 |

Totals : 6408.80054 199.14302

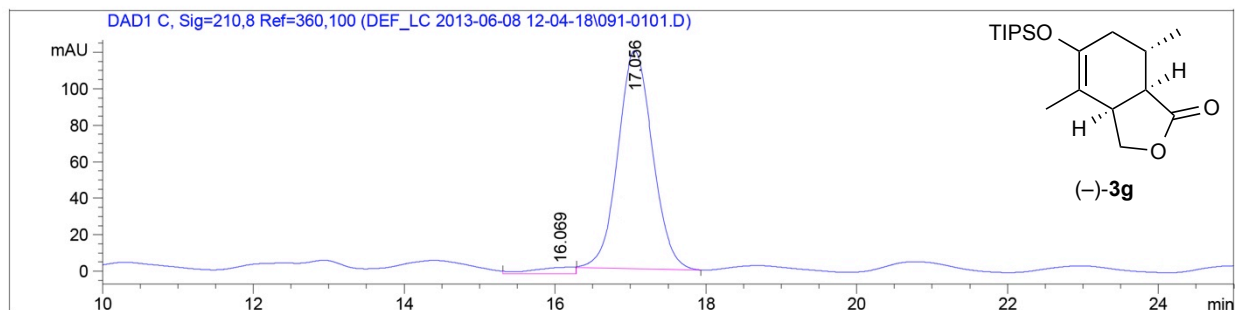

Signal 3: DAD1 C, Sig=210,8 Ref=360,100

| Peak # | RetTime [min] | Type | Width [min] | Area [mAU*s] | Height [mAU] | Area %  |
|--------|---------------|------|-------------|--------------|--------------|---------|
| 1      | 16.069        | MM   | 0.6625      | 87.59249     | 2.20367      | 2.2516  |
| 2      | 17.056        | BB   | 0.4934      | 3802.59204   | 119.45309    | 97.7484 |

Totals : 3890.18453 121.65676

## Determination of enantiomeric excess of bicyclic $\gamma$ -lactone (–)-3h:

**Chiral HPLC analysis of bicyclic  $\gamma$ -lactone (–)-3h:** Chiralcel AS-H column: hexanes:<sup>i</sup>PrOH = 98:02, flow rate 0.5 mL/min,  $\lambda$  = 210 nm:  $t_{\text{major}}$  = 11.8 min,  $t_{\text{minor}}$  = 14.0 min; 91% ee.

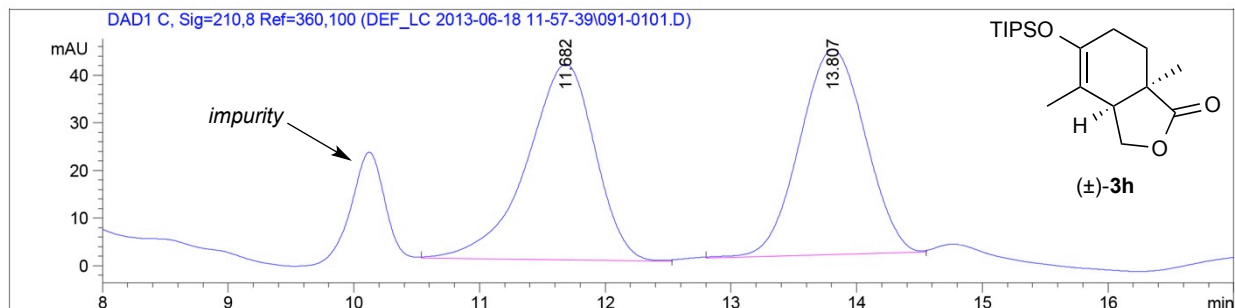

Signal 3: DAD1 C, Sig=210,8 Ref=360,100

| Peak # | RetTime [min] | Type | Width [min] | Area [mAU*s] | Height [mAU] | Area %  |
|--------|---------------|------|-------------|--------------|--------------|---------|
| 1      | 11.682        | MM   | 0.6297      | 1554.04358   | 41.13143     | 49.8886 |
| 2      | 13.807        | MM   | 0.6046      | 1560.98486   | 43.03236     | 50.1114 |

Totals : 3115.02844 84.16378

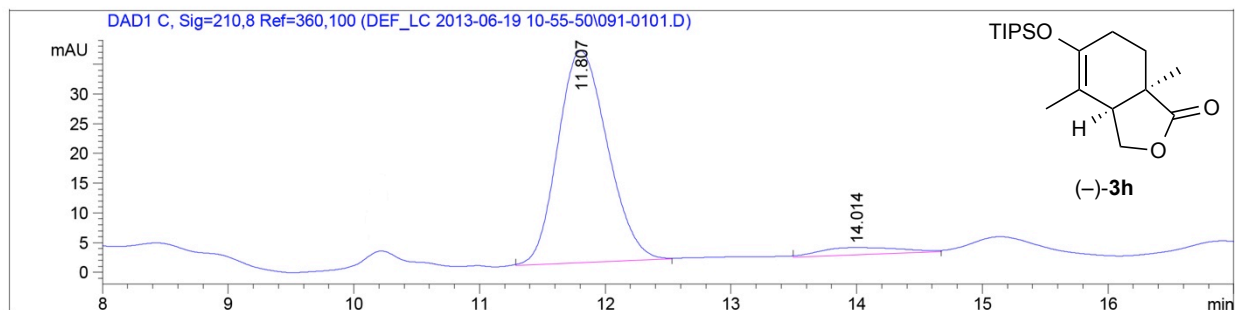

Signal 3: DAD1 C, Sig=210,8 Ref=360,100

| Peak # | RetTime [min] | Type | Width [min] | Area [mAU*s] | Height [mAU] | Area %  |
|--------|---------------|------|-------------|--------------|--------------|---------|
| 1      | 11.807        | BB   | 0.5004      | 9266.48242   | 290.29224    | 95.5840 |
| 2      | 14.014        | BB   | 0.7472      | 428.11127    | 9.54867      | 4.4160  |

Totals : 9694.59369 299.84090

## Determination of enantiomeric excess of bicyclic $\gamma$ -lactone (+)-3i:

**Chiral HPLC analysis of bicyclic  $\gamma$ -lactone (+)-3i:** Chiralcel AD-H column: hexanes:*i*PrOH = 95:05, flow rate 0.5 mL/min,  $\lambda$  = 210 nm:  $t_{\text{major}}$  = 11.4 min,  $t_{\text{minor}}$  = 12.8 min; 99% ee (using 20 mol% (S)-(-)-BTM), 97% ee (using 5 mol% (S)-(-)-BTM).

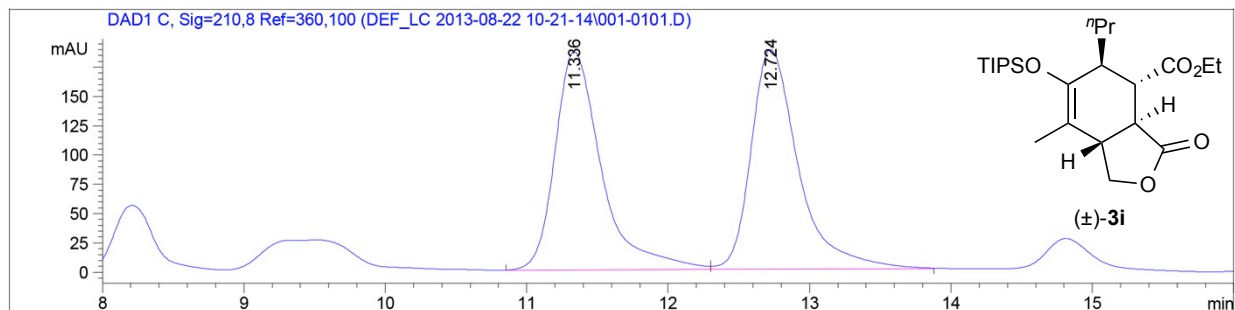

Signal 3: DAD1 C, Sig=210,8 Ref=360,100

| Peak # | RetTime [min] | Type | Width [min] | Area [mAU*s] | Height [mAU] | Area %  |
|--------|---------------|------|-------------|--------------|--------------|---------|
| 1      | 11.336        | BV   | 0.3475      | 4267.38916   | 186.10463    | 49.4355 |
| 2      | 12.724        | VB   | 0.3557      | 4364.84277   | 187.40324    | 50.5645 |

Totals : 8632.23193 373.50787

## Using 20 mol% (S)-(-)-BTM:

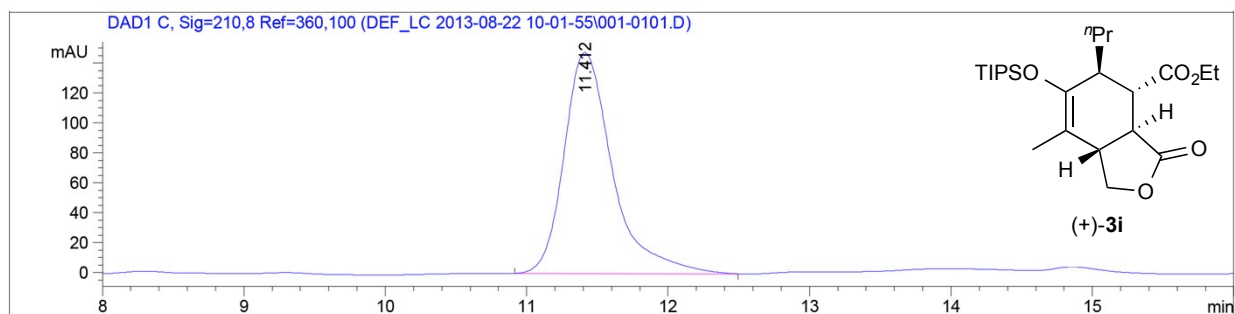

Signal 3: DAD1 C, Sig=210,8 Ref=360,100

| Peak # | RetTime [min] | Type | Width [min] | Area [mAU*s] | Height [mAU] | Area %   |
|--------|---------------|------|-------------|--------------|--------------|----------|
| 1      | 11.412        | BB   | 0.3652      | 3537.73755   | 147.84750    | 100.0000 |

Totals : 3537.73755 147.84750

## Using 5 mol% (S)-(-)-BTM:

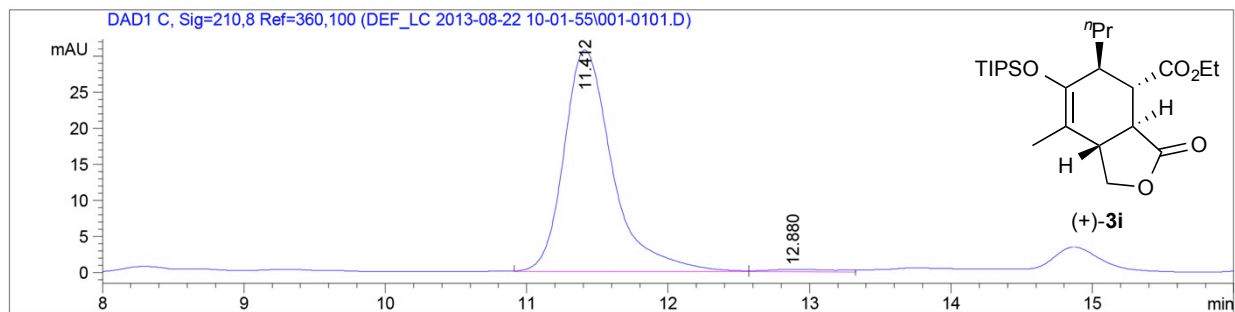

Signal 3: DAD1 C, Sig=210,8 Ref=360,100

| Peak # | RetTime [min] | Type | Width [min] | Area [mAU*s] | Height [mAU] | Area %  |
|--------|---------------|------|-------------|--------------|--------------|---------|
| 1      | 11.412        | BV   | 0.3628      | 733.42120    | 30.69212     | 98.4827 |
| 2      | 12.880        | VB   | 0.3948      | 11.29927     | 3.44362e-1   | 1.5173  |

Totals :                      744.72048    31.03648



## Determination of enantiomeric excess of bicyclic $\delta$ -lactone (+)-**3j**:

**Chiral HPLC analysis of bicyclic  $\delta$ -lactone (+)-**3j**:** Chiralcel OD-H column: hexanes:<sup>i</sup>PrOH = 95:05, flow rate 0.5 mL/min,  $\lambda$  = 210 nm:  $t_{\text{minor}}$  = 10.7 min,  $t_{\text{major}}$  = 12.5 min; 92% ee.

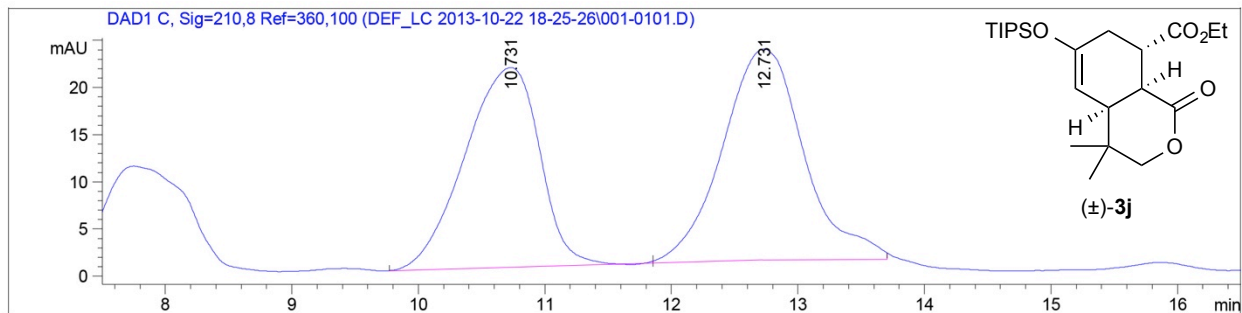

Signal 3: DAD1 C, Sig=210,8 Ref=360,100

| Peak # | RetTime [min] | Type | Width [min] | Area [mAU*s] | Height [mAU] | Area %  |
|--------|---------------|------|-------------|--------------|--------------|---------|
| 1      | 10.731        | BB   | 0.6469      | 868.67236    | 21.16243     | 48.0105 |
| 2      | 12.731        | BV   | 0.6094      | 940.66602    | 22.33294     | 51.9895 |

Totals : 1809.33838 43.49536

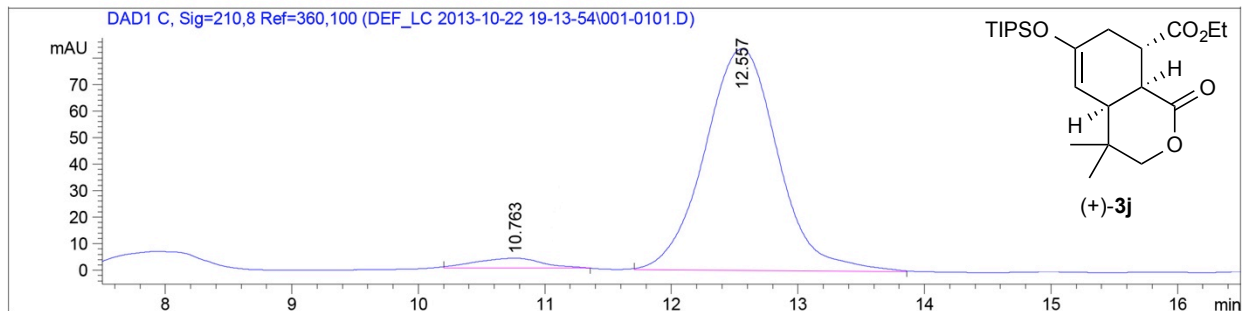

Signal 3: DAD1 C, Sig=210,8 Ref=360,100

| Peak # | RetTime [min] | Type | Width [min] | Area [mAU*s] | Height [mAU] | Area %  |
|--------|---------------|------|-------------|--------------|--------------|---------|
| 1      | 10.763        | MM   | 0.5989      | 131.20264    | 3.65145      | 3.7611  |
| 2      | 12.557        | BB   | 0.6211      | 3357.17163   | 83.48924     | 96.2389 |

Totals : 3488.37427 87.14069

**Figure S14. Chiral HPLC determinations of enantiomeric excess of lactones 3k, 3k' and 3c':**

**Determination of enantiomeric excess of tricyclic  $\gamma$ -lactone (-)-3k:**

**Chiral HPLC analysis of tricyclic  $\gamma$ -lactone (-)-3k:** Chiralcel AS-H column: hexanes:<sup>i</sup>PrOH = 97:03, flow rate 0.5 mL/min,  $\lambda$  = 210 nm:  $t_{\text{major}}$  = 21.1 min,  $t_{\text{minor}}$  = 28.6 min; 99% ee.

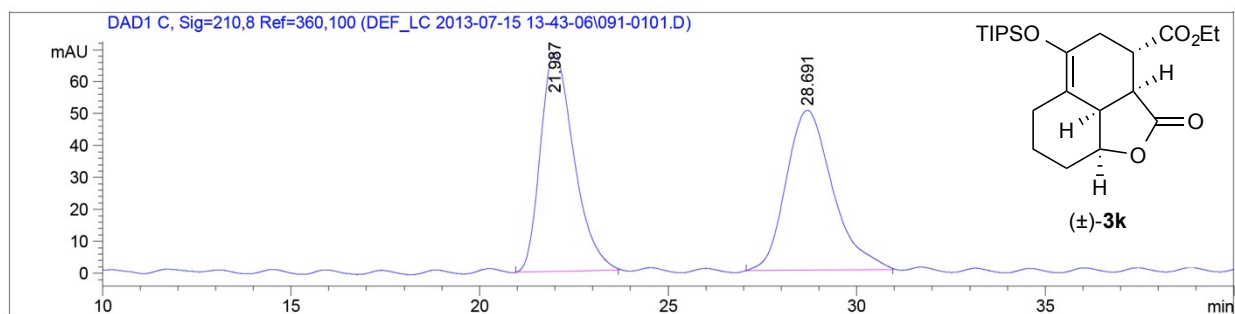

Signal 3: DAD1 C, Sig=210,8 Ref=360,100

| Peak # | RetTime [min] | Type | Width [min] | Area [mAU*s] | Height [mAU] | Area %  |
|--------|---------------|------|-------------|--------------|--------------|---------|
| 1      | 21.987        | BB   | 0.9366      | 4223.71094   | 68.57260     | 49.4877 |
| 2      | 28.691        | BB   | 1.2717      | 4311.16748   | 50.10910     | 50.5123 |

Totals : 8534.87842 118.68170

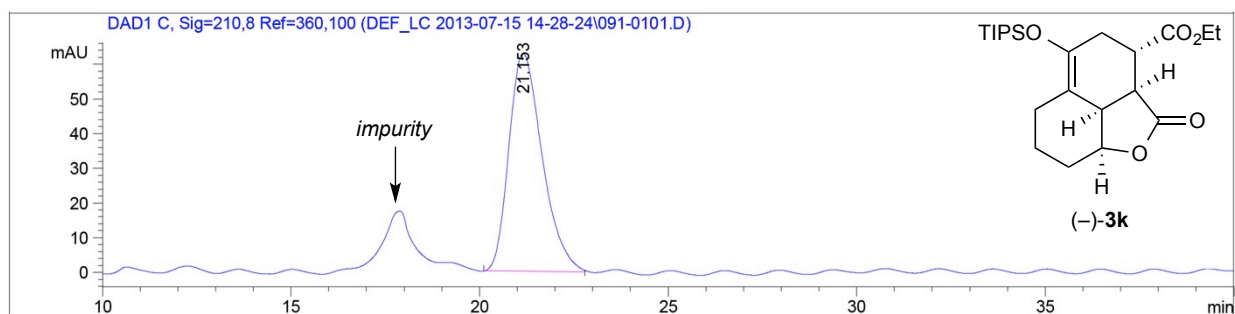

Signal 3: DAD1 C, Sig=210,8 Ref=360,100

| Peak # | RetTime [min] | Type | Width [min] | Area [mAU*s] | Height [mAU] | Area %   |
|--------|---------------|------|-------------|--------------|--------------|----------|
| 1      | 21.153        | BB   | 0.9376      | 3851.73779   | 62.79996     | 100.0000 |

Totals : 3851.73779 62.79996

## Determination of enantiomeric excess of tricyclic $\gamma$ -lactone (–)-3k':

**Chiral HPLC analysis of tricyclic  $\gamma$ -lactone (–)-3k':** Chiralcel OD-H column: hexanes:<sup>i</sup>PrOH = 95:05, flow rate 0.5 mL/min,  $\lambda$  = 210 nm:  $t_{\text{minor}}$  = 17.4 min,  $t_{\text{major}}$  = 25.7 min; 99% ee.

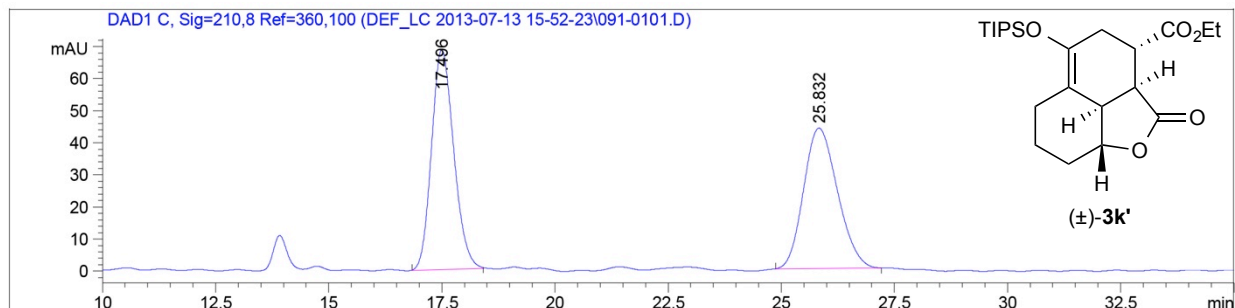

Signal 3: DAD1 C, Sig=210,8 Ref=360,100

| Peak # | RetTime [min] | Type | Width [min] | Area [mAU*s] | Height [mAU] | Area %  |
|--------|---------------|------|-------------|--------------|--------------|---------|
| 1      | 17.496        | BB   | 0.5305      | 2341.91187   | 68.56427     | 50.6538 |
| 2      | 25.832        | BB   | 0.8102      | 2281.45386   | 43.76495     | 49.3462 |

Totals : 4623.36572 112.32922

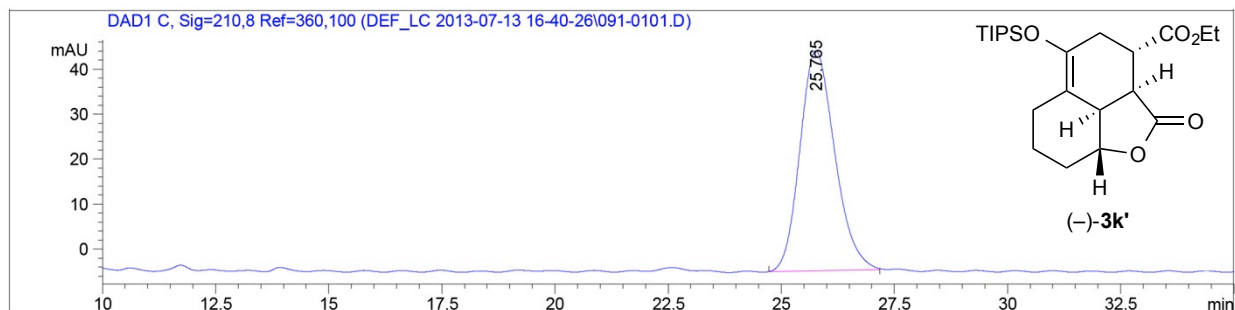

Signal 3: DAD1 C, Sig=210,8 Ref=360,100

| Peak # | RetTime [min] | Type | Width [min] | Area [mAU*s] | Height [mAU] | Area %   |
|--------|---------------|------|-------------|--------------|--------------|----------|
| 1      | 25.765        | BB   | 0.8166      | 2615.85327   | 48.86073     | 100.0000 |

Totals : 2615.85327 48.86073

## Determination of enantiomeric excess of bicyclic $\gamma$ -lactone (+)-3c':

**Chiral HPLC analysis of bicyclic  $\gamma$ -lactone (+)-3c':** Chiralcel OD-H column: hexanes:<sup>i</sup>PrOH = 95:05, flow rate 0.5 mL/min,  $\lambda$  = 210 nm:  $t_{\text{minor}}$  = 22.1 min,  $t_{\text{major}}$  = 26.1 min; 99% ee.

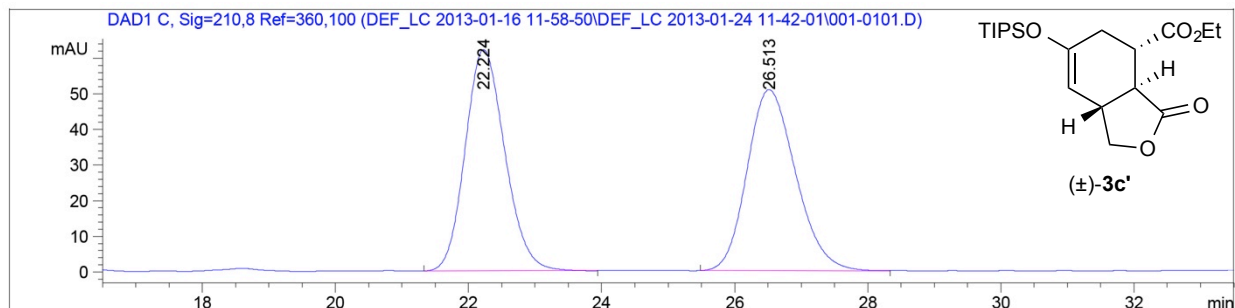

Signal 3: DAD1 C, Sig=210,8 Ref=360,100

| Peak # | RetTime [min] | Type | Width [min] | Area [mAU*s] | Height [mAU] | Area %  |
|--------|---------------|------|-------------|--------------|--------------|---------|
| 1      | 22.224        | BB   | 0.6433      | 2574.76782   | 62.15416     | 49.9667 |
| 2      | 26.513        | BB   | 0.7918      | 2578.20190   | 50.82896     | 50.0333 |

Totals : 5152.96973 112.98312

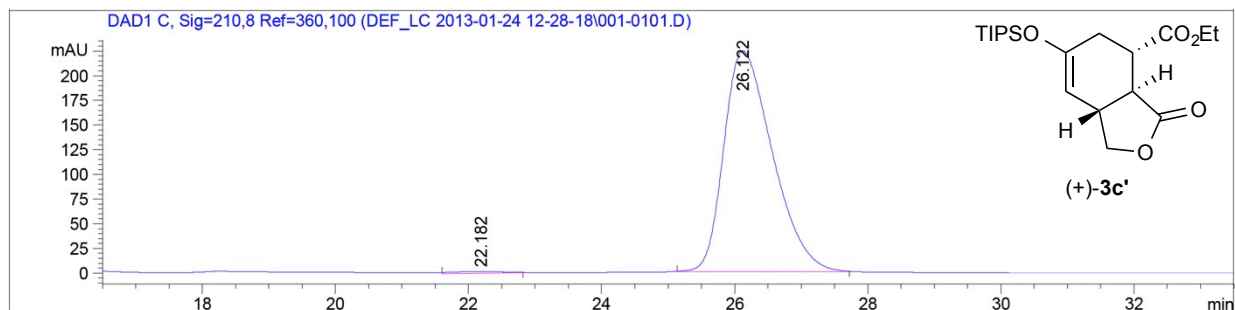

Signal 3: DAD1 C, Sig=210,8 Ref=360,100

| Peak # | RetTime [min] | Type | Width [min] | Area [mAU*s] | Height [mAU] | Area %  |
|--------|---------------|------|-------------|--------------|--------------|---------|
| 1      | 22.182        | MM   | 0.8519      | 85.42705     | 1.67124      | 0.7437  |
| 2      | 26.122        | BB   | 0.7879      | 1.14013e4    | 223.98254    | 99.2563 |

Totals : 1.14867e4 225.65378

## References:

1. Seebach, D., Imwinkelried, R. & Stucky, G. Optically-active alcohols from 1,3-dioxan-4-ones – a practical version of enantioselective synthesis with nucleophilic-substitution at acetal centers. *Helv. Chim. Acta.* **70**, 448-464 (1987).
2. Birman, V. B. & Li, X. M. Homobenzotetramisole: An effective catalyst for kinetic resolution of aryl-cycloalkanols. *Org. Lett.* **10**, 1115-1118 (2008).
3. Calter, M. A. Catalytic, asymmetric dimerization of methylketene. *J. Org. Chem.* **61**, 8006-8007 (1996).
4. Pracejus, H. & Matje, H. Zusammenhänge zwischen dem räumlichen Bau einiger alkaloidartiger Katalysatoren und ihren stereospezifischen Wirkungen bei asymmetrischen Estersynthesen. *J. Prakt. Chem.* **24**, 195-205 (1964).
5. Runcie, K. A. & Taylor, R. J. K. The in situ oxidation-Wittig reaction of  $\alpha$ -hydroxyketones. *Chem. Commun.* 974-975 (2002).
6. Ng, S. S. & Jamison, T. F. Simple alkenes as substitutes for organometallic reagents: Nickel-catalyzed, intermolecular coupling of aldehydes, silyl triflates, and alpha olefins. *J. Am. Chem. Soc.* **127**, 14194-14195 (2005).
7. Yu, J. Q. & Corey, E. J. A mild, catalytic, and highly selective method for the oxidation of  $\alpha,\beta$ -enones to 1,4-enediones. *J. Am. Chem. Soc.* **125**, 3232-3233 (2003).
8. Gaussian 09, Revision **B.01**, Frisch, M. J., Trucks, G. W., Schlegel, H. B., Scuseria, G. E., Robb, M. A., Cheeseman, J. R., Scalmani, G., Barone, V., Mennucci, B., Petersson, G. A., Nakatsuji, H., Caricato, M., Li, X., Hratchian, H. P., Izmaylov, A. F., Bloino, J., Zheng, G., Sonnenberg, J. L., Hada, M., Ehara, M., Toyota, K., Fukuda, R., Hasegawa, J., Ishida, M., Nakajima, T., Honda, Y., Kitao, O., Nakai, H., Vreven, T., Montgomery, Jr., J. A., Peralta, J. E., Ogliaro, F., Bearpark, M., Heyd, J. J., Brothers, E., Kudin, K. N., Staroverov, V. N., Kobayashi, R., Normand, J., Raghavachari, K., Rendell, A., Burant, J. C., Iyengar, S. S., Tomasi, J., Cossi, M., Rega, N., Millam, N. J., Klene, M., Knox, J. E., Cross, J. B., Bakken, V., Adamo, C., Jaramillo, J., Gomperts, R., Stratmann, R. E., Yazyev, O., Austin, A. J., Cammi, R., Pomelli, C., Ochterski, J. W., Martin, R. L., Morokuma, K., Zakrzewski, V. G., Voth, G. A., Salvador, P., Dannenberg, J. J., Dapprich, S., Daniels, A. D., Farkas, Ö., Foresman, J. B., Ortiz, J. V., Cioslowski, J. & Fox, D. J. Gaussian, Inc., Wallingford CT, 2009.
9. Gaussian 09, Revision **D.01**, Frisch, M. J., Trucks, G. W., Schlegel, H. B., Scuseria, G. E., Robb, M. A., Cheeseman, J. R., Scalmani, G., Barone, V., Mennucci, B., Petersson, G. A., Nakatsuji, H., Caricato, M., Li, X., Hratchian, H. P., Izmaylov, A. F., Bloino, J., Zheng, G., Sonnenberg, J. L., Hada, M., Ehara, M.,

- Toyota, K., Fukuda, R., Hasegawa, J., Ishida, M., Nakajima, T., Honda, Y., Kitao, O., Nakai, H., Vreven, T., Montgomery, Jr., J. A., Peralta, J. E., Ogliaro, F., Bearpark, M., Heyd, J. J., Brothers, E., Kudin, K. N., Staroverov, V. N., Keith, T., Kobayashi, R., Normand, J., Raghavachari, K., Rendell, A., Burant, J. C., Iyengar, S. S., Tomasi, J., Cossi, M., Rega, N., Millam, J. M., Klene, M., Knox, J. E., Cross, J. B., Bakken, V., Adamo, C., Jaramillo, J., Gomperts, R., Stratmann, R. E., Yazyev, O., Austin, A. J., Cammi, R., Pomelli, C., Ochterski, J. W., Martin, R. L., Morokuma, K., Zakrzewski, V. G., Voth, G. A., Salvador, P., Dannenberg, J. J., Dapprich, S., Daniels, A. D., Farkas, O., Foresman, J. B., Ortiz, J. V., Cioslowski, J. & Fox, D. J. Gaussian, Inc., Wallingford CT, 2013.
10. Shao, Y., Molnar, L. F., Jung, Y., Kussmann, J., Ochsenfeld, C., Brown, S. T., Gilbert, A. T., Slipchenko, L. V., Levchenko, S. V., O'Neill, D. P., DiStasio, R. A., Jr., Lochan, R. C., Wang, T., Beran, G. J., Besley, N. A., Herbert, J. M., Lin, C. Y., Van Voorhis, T., Chien, S. H., Sodt, A., Steele, R. P., Rassolov, V. A., Maslen, P. E., Korambath, P. P., Adamson, R. D., Austin, B., Baker, J., Byrd, E. F., Dachsel, H., Doerksen, R. J., Dreuw, A., Dunietz, B. D., Dutoi, A. D., Furlani, T. R., Gwaltney, S. R., Heyden, A., Hirata, S., Hsu, C. P., Kedziora, G., Khalliulin, R. Z., Klunzinger, P., Lee, A. M., Lee, M. S., Liang, W., Lotan, I., Nair, N., Peters, B., Proynov, E. I., Pieniazek, P. A., Rhee, Y. M., Ritchie, J., Rosta, E., Sherrill, C. D., Simmonett, A. C., Subotnik, J. E., Woodcock, H. L., 3rd, Zhang, W., Bell, A. T., Chakraborty, A. K., Chipman, D. M., Keil, F. J., Warshel, A., Hehre, W. J., Schaefer, H. F., 3rd, Kong, J., Krylov, A. I., Gill, P. M. & Head-Gordon, M. Advances in methods and algorithms in a modern quantum chemistry program package. *Phys. Chem. Chem. Phys.* **8**, 3172-3191 (2006).
  11. Zhao, Y. & Truhlar, D. The M06 suite of density functionals for main group thermochemistry, thermochemical kinetics, noncovalent interactions, excited states, and transition elements: Two new functionals and systematic testing of four M06-class functionals and 12 other functionals. *Theor. Chem. Acc.* **120**, 215-241 (2008).
  12. Zhao, Y. & Truhlar, D. G. Density functionals with broad applicability in chemistry. *Acc. Chem. Res.* **41**, 157-167 (2008).
  13. Marenich, A. V., Cramer, C. J. & Truhlar, D. G. Universal solvation model based on solute electron density and on a continuum model of the solvent defined by the bulk dielectric constant and atomic surface tensions. *J. Phys. Chem. B* **113**, 6378-6396 (2009).
  14. NBO 6.0. Glendening, E. D., Badenhoop, J. K., Reed, A. E., Carpenter, J. E., Bohmann, J. A., Morales, C. M., Landis, C. R. & Weinhold, F. Theoretical Chemistry Institute, University of Wisconsin, Madison, WI, 2013 (<http://nbo6.chem.wisc.edu>)
  15. CYLview, 1.0b; Legault, C. Y., Université de Sherbrooke, 2009 (<http://www.cylview.org>)

16. Kraka, E. & Cremer, D. Computational analysis of the mechanism of chemical reactions in terms of reaction phases: Hidden intermediates and hidden transition states. *Acc. Chem. Res.* **43**, 591-601 (2010).
17. Cahill, K. J. & Johnson, R. P. Beyond frontier molecular orbital theory: A systematic electron transfer model (ETM) for polar bimolecular organic reactions. *J. Org. Chem.* **78**, 1864-1873 (2012).
